# Supplementary material
Source: publisher figshare collection journal article supplement (https://gsapubs.figshare.com/articles/dataset/_/24470773)
Supplement: Supplementary file 1 [file 1]

Supplementary Table S4. Sr–Nd data of Early Permian intrusions from northern NCC and Paleoproterozoic mafic dykes from Western Shandong peninsula

| Sample                                            | No. | $^{87}\text{Sr}/^{86}\text{Sr}$ | 2 $\sigma$ | $^{143}\text{Nd}/^{144}\text{Nd}$ | 2 $\sigma$ | $\epsilon_{\text{Nd}}(0)$ | $\epsilon_{\text{Nd}}(t)$ | Reference           |
|---------------------------------------------------|-----|---------------------------------|------------|-----------------------------------|------------|---------------------------|---------------------------|---------------------|
| Boluonuo complexes<br>(T = 300 Ma)                | 1   | 0.705483                        | 0.000013   | 0.51195                           | 0.000013   | -13.4                     | -10.9                     | Zhang et al., 2009a |
|                                                   | 2   | 0.706271                        | 0.000015   | 0.512014                          | 0.000013   | -12.2                     | -13.4                     |                     |
| Liuying complexes (T = 300 Ma)                    | 1   | 0.705716                        | 0.000012   | 0.511862                          | 0.000013   | -15.1                     | -14.1                     |                     |
| Xianghuangqi–Wudaoyingzi<br>pluton (T = 280 Ma)   | 1   | 0.705997                        | 0.00001    | 0.512016                          | 0.000011   | -12.1                     | -9.3                      |                     |
|                                                   | 2   | 0.7062                          | 0.000011   | 0.511936                          | 0.000012   | -13.7                     | -11.1                     | Zhang et al., 2012  |
|                                                   | 1   | 0.707986                        | 0.000012   | 0.511979                          | 0.000014   | -12.9                     | -8.9                      |                     |
|                                                   | 2   | 0.707761                        | 0.000013   | 0.511746                          | 0.000013   | -17.4                     | -13.68                    |                     |
|                                                   | 3   | 0.708272                        | 0.000012   | 0.511954                          | 0.000021   | -13.3                     | -9.95                     |                     |
|                                                   | 4   | 0.708178                        | 0.000012   | 0.511844                          | 0.000012   | -15.5                     | -12.26                    |                     |
|                                                   | 5   | 0.70965                         | 0.000013   | 0.511834                          | 0.000011   | -15.7                     | -13.13                    |                     |
|                                                   | 6   | 0.706283                        | 0.000011   | 0.511936                          | 0.000015   | -13.7                     | -10.84                    |                     |
|                                                   | 7   | 0.709802                        | 0.000016   | 0.511815                          | 0.000014   | -16.1                     | -13.4                     |                     |
|                                                   | 8   | 0.708317                        | 0.000012   | 0.511932                          | 0.000014   | -13.8                     | -10.58                    |                     |
|                                                   | 9   | 0.708478                        | 0.00001    | 0.511961                          | 0.000013   | -13.2                     | -10.45                    |                     |
|                                                   | 10  | 0.708552                        | 0.00001    | 0.511932                          | 0.000012   | -13.8                     | -10.99                    |                     |
| Appinitic intrusions from south<br>Inner Mongolia | 11  | 0.705941                        | 0.000011   | 0.512069                          | 0.000013   | -11.1                     | -8.27                     | Zhang et al., 2011  |
|                                                   | 12  | 0.705657                        | 0.000011   | 0.512054                          | 0.000014   | -11.4                     | -8.79                     |                     |
|                                                   | 1   | 0.70589                         | 0.00001    | 0.512078                          | 0.000017   | -10.9                     | -8.08                     |                     |
|                                                   | 2   | 0.705821                        | 0.000011   | 0.512043                          | 0.000012   | -11.6                     | -8.71                     |                     |
|                                                   | 3   | 0.704658                        | 0.000011   | 0.512097                          | 0.000012   | -10.6                     | -7.74                     |                     |
|                                                   | 4   | 0.704783                        | 0.000013   | 0.512094                          | 0.000016   | -10.6                     | -7.82                     |                     |
|                                                   | 5   | 0.704735                        | 0.00001    | 0.512096                          | 0.000016   | -10.6                     | -7.73                     |                     |
|                                                   | 6   | 0.705917                        | 0.00001    | 0.511985                          | 0.000013   | -12.7                     | -9.75                     |                     |
|                                                   | 7   | 0.705795                        | 0.000011   | 0.511981                          | 0.000012   | -12.8                     | -9.9                      |                     |
|                                                   | 8   | 0.705468                        | 0.000012   | 0.511961                          | 0.000015   | -13.2                     | -10.2                     |                     |
|                                                   | 9   | 0.706743                        | 0.000011   | 0.51208                           | 0.000018   | -10.9                     | -7.73                     |                     |
| Guyang batholith                                  |     |                                 |            |                                   |            |                           |                           |                     |

|                                                 |    |          |          |          |          |       |        |                     |
|-------------------------------------------------|----|----------|----------|----------|----------|-------|--------|---------------------|
|                                                 | 10 | 0.706016 | 0.00001  | 0.512024 | 0.000015 | -12.0 | -9.2   |                     |
|                                                 | 11 | 0.705977 | 0.000011 | 0.512019 | 0.000013 | -12.1 | -9.36  |                     |
|                                                 | 12 | 0.70691  | 0.000011 | 0.511798 | 0.00001  | -16.4 | -13.81 |                     |
|                                                 | 13 | 0.706568 | 0.000011 | 0.511787 | 0.000015 | -16.6 | -13.77 |                     |
|                                                 | 14 | 0.70729  | 0.000012 | 0.511802 | 0.000014 | -16.3 | -13.86 |                     |
|                                                 | 15 | 0.708886 | 0.000009 | 0.511758 | 0.000014 | -17.2 | -13.51 |                     |
|                                                 | 16 | 0.70627  | 0.00001  | 0.512258 | 0.000015 | -7.4  | -4.67  |                     |
|                                                 | 17 | 0.706258 | 0.000011 | 0.511773 | 0.000012 | -16.9 | -13.88 |                     |
|                                                 | 18 | 0.706158 | 0.000011 | 0.511913 | 0.000011 | -14.1 | -11.44 |                     |
|                                                 | 19 | 0.706391 | 0.00001  | 0.511996 | 0.000014 | -12.5 | -9.85  |                     |
|                                                 | 20 | 0.707028 | 0.000012 | 0.511958 | 0.000012 | -13.3 | -10.12 |                     |
|                                                 | 21 | 0.706751 | 0.000012 | 0.511963 | 0.000013 | -13.2 | -10.36 |                     |
|                                                 | 22 | 0.706907 | 0.000011 | 0.511981 | 0.000013 | -12.8 | -10.1  |                     |
|                                                 | 23 | 0.707625 | 0.000015 | 0.511822 | 0.000011 | -15.9 | -12.34 |                     |
|                                                 | 24 | 0.707188 | 0.000012 | 0.511893 | 0.000012 | -14.5 | -10.52 |                     |
|                                                 | 25 | 0.705331 | 0.00001  | 0.512054 | 0.000011 | -11.4 | -8.48  |                     |
|                                                 | 26 | 0.707449 | 0.000012 | 0.511886 | 0.00001  | -14.7 | -10.88 |                     |
|                                                 | 27 | 0.706611 | 0.000012 | 0.511944 | 0.000011 | -13.5 | -10.1  |                     |
|                                                 | 28 | 0.710298 | 0.000013 | 0.511888 | 0.000009 | -14.6 | -11.31 |                     |
|                                                 | 29 | 0.706795 | 0.000013 | 0.512047 | 0.000012 | -11.5 | -8.36  |                     |
| Xianghuangqi–Wudaoyingzi<br>pluton (T = 280 Ma) | 1  | 0.705997 | 0.00001  | 0.512016 | 0.000012 | -12.1 | -9.3   |                     |
|                                                 | 2  | 0.706256 | 0.000013 | 0.511794 | 0.000012 | -16.5 | -13.2  |                     |
|                                                 | 3  | 0.705985 | 0.000013 | 0.511817 | 0.000013 | -16.0 | -13.1  |                     |
|                                                 | 4  | 0.7062   | 0.000011 | 0.511936 | 0.000012 | -13.7 | -11.1  |                     |
| Tianqiao pluton (T = 285 Ma)                    | 1  | 0.706332 | 0.000013 | 0.511903 | 0.000013 | -14.3 | -11.2  | Zhang et al., 2009b |
|                                                 | 2  | 0.706529 | 0.000008 | 0.511781 | 0.000013 | -16.7 | -14.2  |                     |
| Lingying pluton (T = 288 Ma)                    | 1  | 0.706051 | 0.000013 | 0.511526 | 1.000013 | -21.7 | -17.4  |                     |
| Zhoutaizi pluton (T = 291 Ma)                   | 1  | 0.705524 | 0.000011 | 0.511889 | 0.000011 | -14.6 | -11    |                     |
| Longhua pluton 311 Ma                           | 1  | 0.708518 | 0.000014 | 0.51179  | 0.000009 | -16.5 | -12.6  | Zhang et al., 2009c |

|                                |   |          |          |          |          |       |       |                 |
|--------------------------------|---|----------|----------|----------|----------|-------|-------|-----------------|
|                                | 2 | 0.709116 | 0.000012 | 0.511788 | 0.000011 | -16.6 | -12.9 |                 |
|                                | 1 | 0.70494  | 0.000011 | 0.511888 | 0.00001  | -14.6 | -11   |                 |
| Daguangding pluton 318 Ma      | 2 | 0.704814 | 0.000011 | 0.511934 | 0.000009 | -13.7 | -9.9  |                 |
|                                | 3 | 0.704991 | 0.000009 | 0.511836 | 0.000011 | -15.6 | -11.5 |                 |
| Boluonuo PLUTON (T = 302 Ma)   | 1 | 0.705084 | 1.00001  | 0.511632 | 0.000012 | -19.6 | -15.9 |                 |
|                                | 2 | 0.705238 | 0.000011 | 0.511656 | 0.000012 | -19.2 | -15.6 |                 |
| Hushiha pluton 310 Ma          | 1 | 0.705147 | 0.000011 | 0.511829 | 0.000012 | -15.8 | -11.5 |                 |
|                                | 2 | 0.705033 | 0.000011 | 0.511545 | 0.000011 | -21.3 | -17.1 |                 |
| Jianping diorite pluton 304 Ma | 1 | 0.708109 | 1.00001  | 0.511831 | 0.000012 | -15.7 | -12.1 |                 |
|                                | 2 | 0.711185 | 1.00001  | 0.511692 | 0.000012 | -18.5 | -15.3 |                 |
|                                | 1 | 0.706103 | 0.000018 | 0.512094 | 0.000006 | -10.6 | -8.2  |                 |
|                                | 2 | 0.705864 | 0.00002  | 0.512074 | 0.000007 | -11.0 | -8.2  |                 |
|                                | 3 | 0.705365 | 0.000016 | 0.512024 | 0.000011 | -12.0 | -9.6  |                 |
| Boluonuo PLUTON (T = 296 Ma)   | 4 | 0.705409 | 0.000018 | 0.512026 | 0.000006 | -11.9 | -9.8  |                 |
|                                | 5 | 0.704931 | 0.000016 | 0.511781 | 0.000005 | -16.7 | -13.1 |                 |
|                                | 6 | 0.70473  | 0.000014 | 0.511697 | 0.00001  | -18.4 | -14.6 | Ma et al., 2013 |
|                                | 7 | 0.70482  | 0.00002  | 0.511613 | 0.000007 | -20.0 | -16.5 |                 |
|                                | 1 | 0.705491 | 0.000013 | 0.51177  | 0.000006 | -16.9 | -11.8 |                 |
| Daguangding pluton 314 Ma      | 2 | 0.705734 | 0.000017 | 0.511757 | 0.000007 | -17.2 | -12.2 |                 |
|                                | 3 | 0.706275 | 0.000017 | 0.511686 | 0.000007 | -18.6 | -15.2 |                 |

Zhang, S.H., Zhao, Y., Liu, X.C., Liu, D.Y., Chen, F., Xie, L.W. and Chen, H.H., 2009a. Late Paleozoic to Early Mesozoic mafic–ultramafic complexes from the northern North China Block: constraints on the composition and evolution of the lithospheric mantle. *Lithos*, 110(1-4), pp.229-246.

Zhang, X., Gao, Y., Wang, Z., Liu, H. and Ma, Y., 2012. Carboniferous appinitic intrusions from the northern North China craton: geochemistry, petrogenesis and tectonic implications. *Journal of the Geological Society*, 169(3), pp.337-351.

Zhang, X., Mao, Q., Zhang, H., Zhai, M., Yang, Y. and Hu, Z., 2011. Mafic and felsic magma interaction during the construction of high-K calc-alkaline plutons within a metacratonic passive margin: the Early Permian Guyang batholith from the northern North China Craton. *Lithos*, 125(1-2), pp.569-591.

Zhang, S.H., Zhao, Y., Kröner, A., Liu, X.M., Xie, L.W. and Chen, F.K., 2009b. Early Permian plutons from the northern North China Block: constraints on continental arc evolution and convergent margin magmatism related to the Central Asian Orogenic Belt. *International Journal of Earth Sciences*, 98(6), pp.1441-1467.

Zhang, S.H., Zhao, Y., Song, B., Hu, J.M., Liu, S.W., Yang, Y.H., Chen, F.K., Liu, X.M. and Liu, J., 2009c. Contrasting Late Carboniferous and Late Permian–Middle Triassic intrusive suites from the northern margin of the North China craton: Geochronology, petrogenesis, and tectonic implications. *Geological Society of America Bulletin*, 121(1-2), pp.181-200.

Ma, X., Chen, B., Chen, J. and Niu, X., 2013. Zircon SHRIMP U-Pb age, geochemical, Sr-Nd isotopic, and in-situ Hf isotopic data of the Late Carboniferous-Early Permian plutons in the northern margin of the North China Craton. *Science China Earth Sciences*, 56(1), pp.126-144.
