# Supplementary material
Source: publisher figshare collection journal article supplement (https://gsapubs.figshare.com/articles/dataset/_/24470773)
Supplement: Supplementary file 1 [file 1]

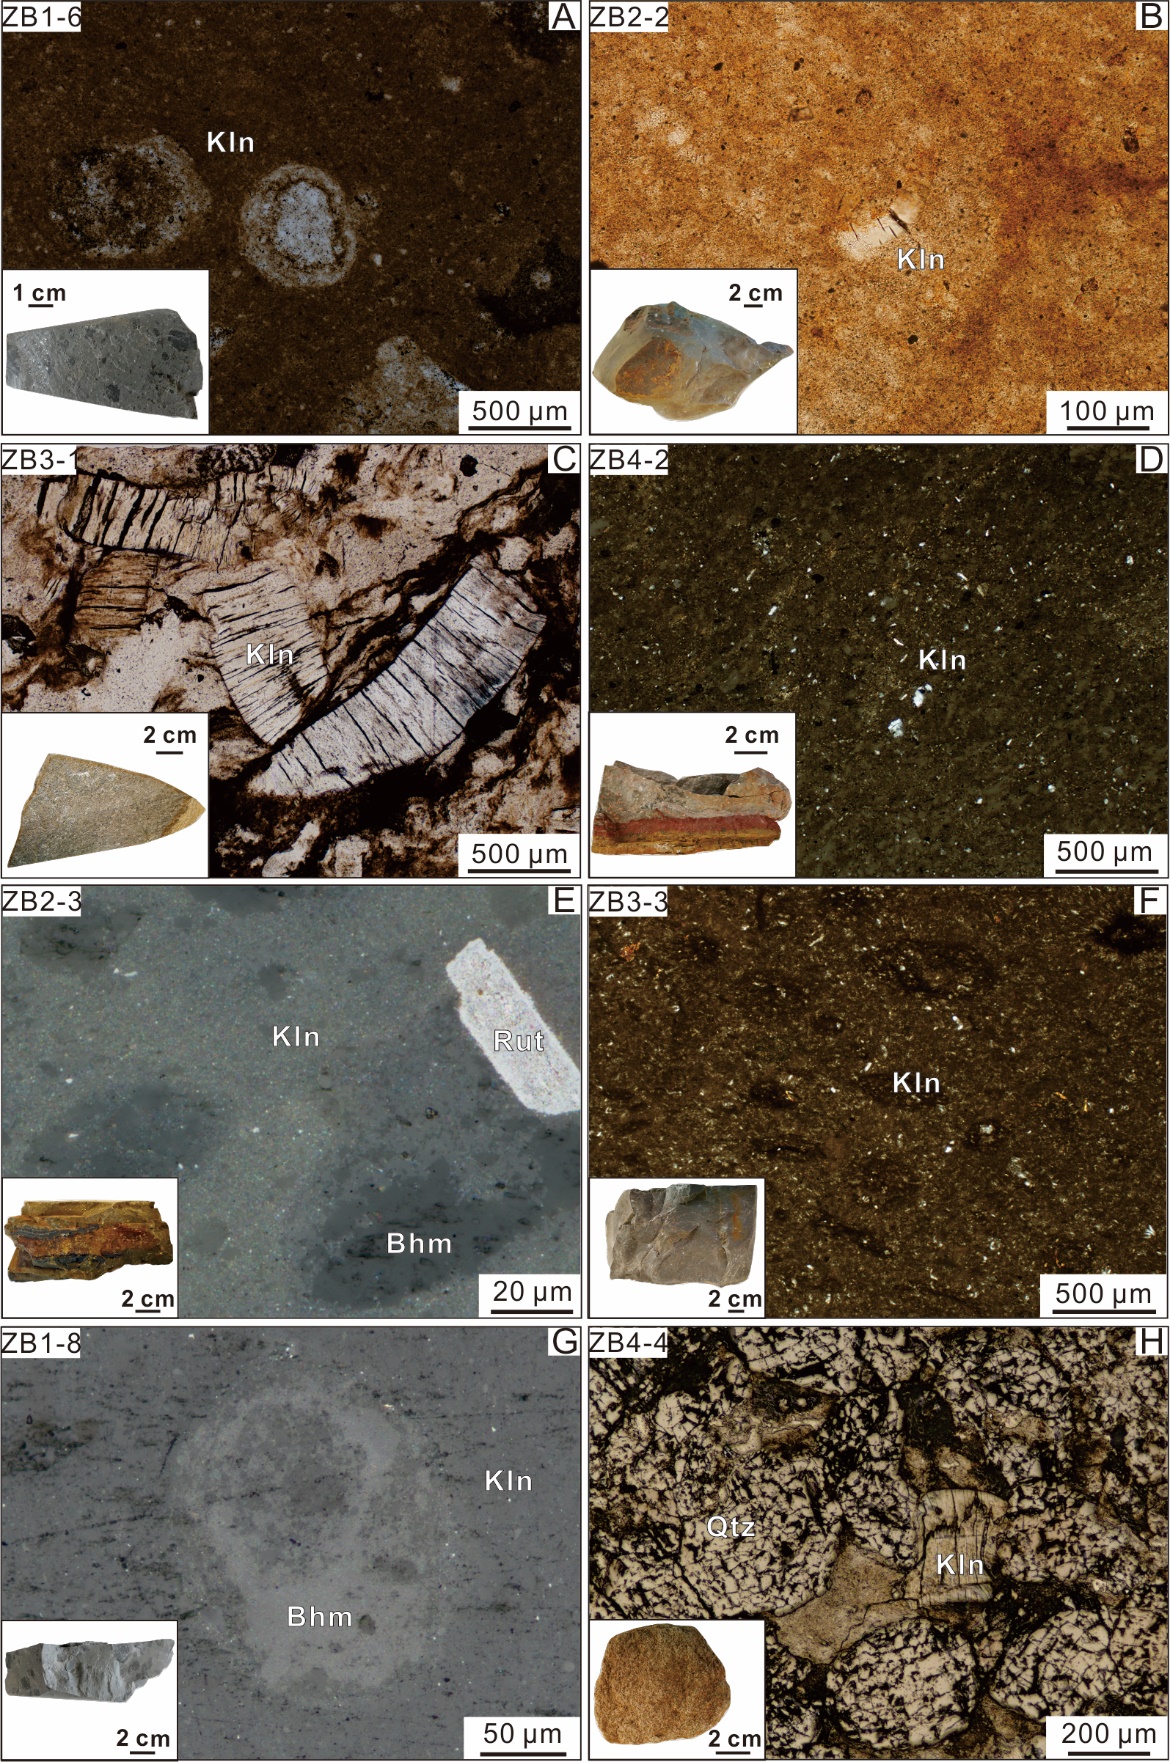


Fig. S1. Photomicrographs and hand specimen photographs of the bauxite-clay ore from Zibo, eastern NCC.


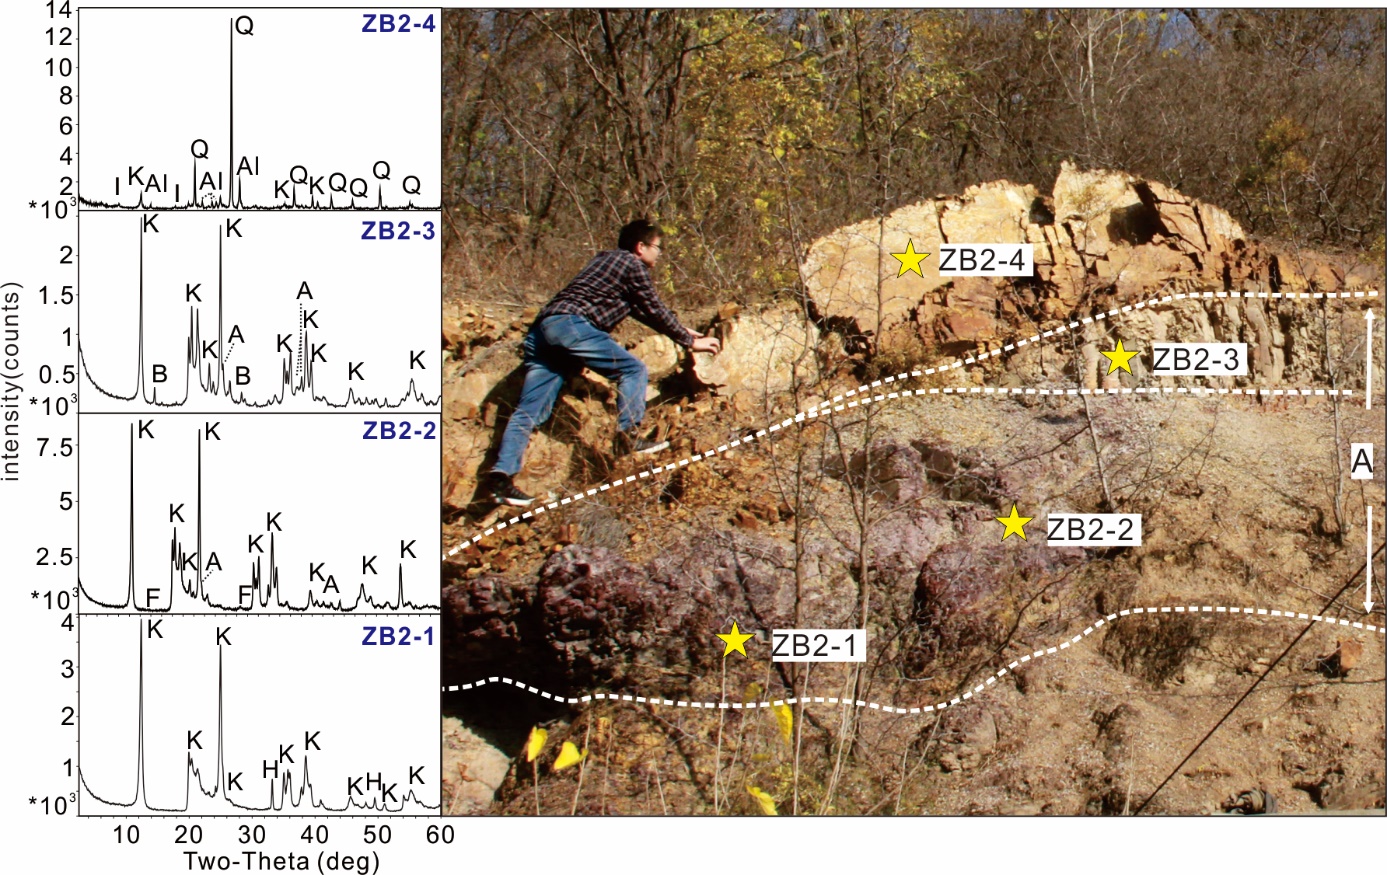


Fig. S2. Field photos and XRD patterns of bauxite-clay and sandstone samples from Dongdingshan, Zibo illustrating kaolinite in the lower section has a medium- to high-defect structure while kaolinite in the upper section has lower-defect.


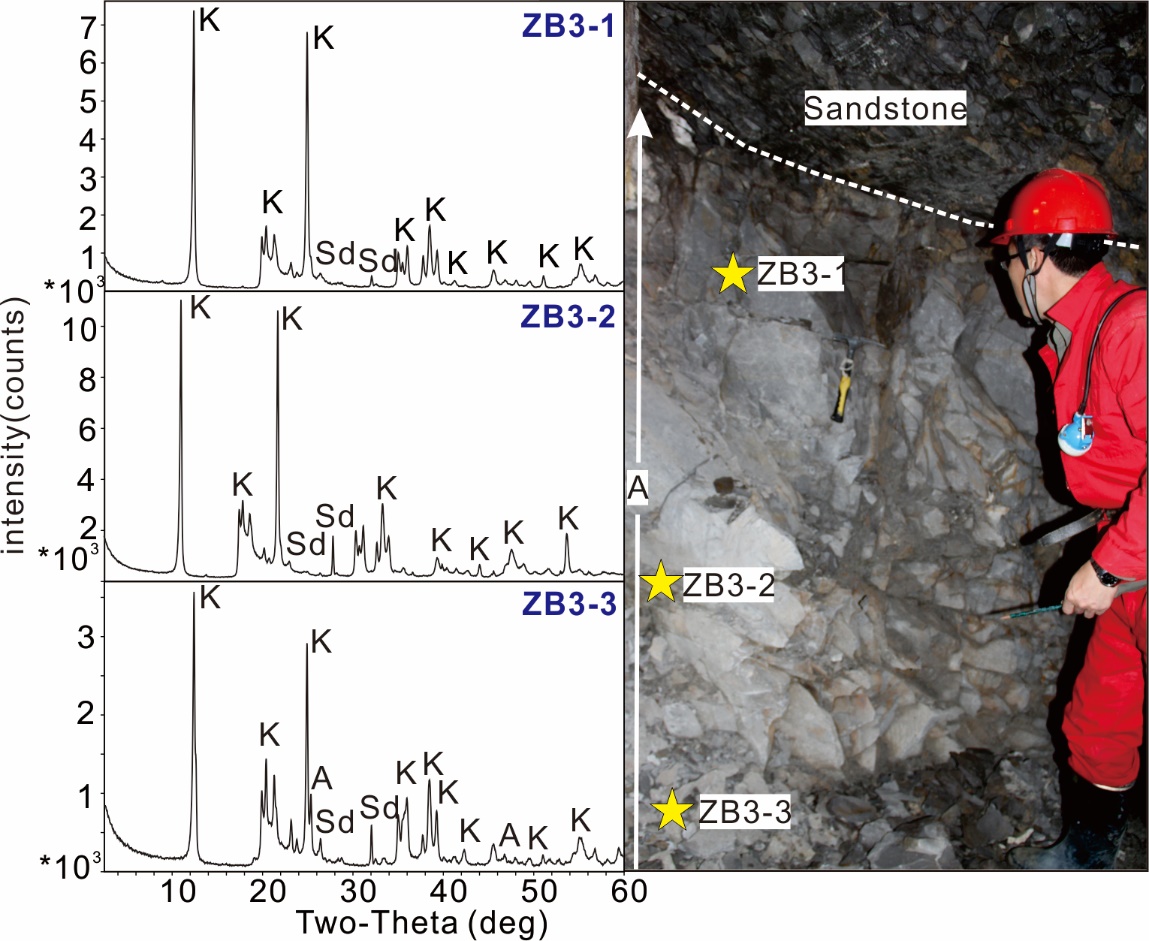


Fig. S3. Field photos and XRD patterns of bauxite-clay and sandstone samples from Yang’gu, Zibo illustrating kaolinite in the lower section has a medium- to high-defect structure while kaolinite in the upper section has lower-defect.


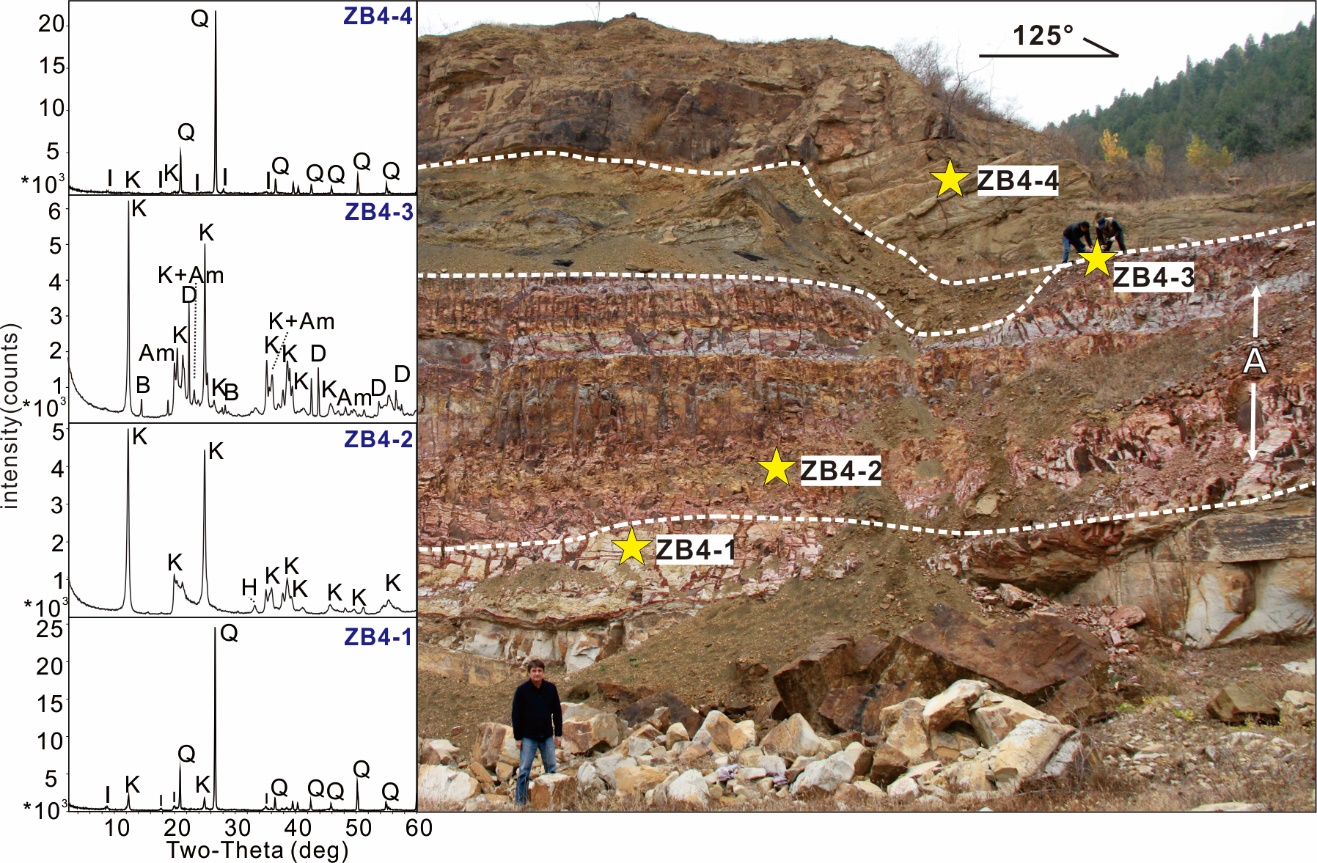


Fig. S4. Field photos and XRD patterns of bauxite-clay and sandstone samples from Dongchongshan, Zibo illustrating kaolinite in the lower section has a medium- to high-defect structure while kaolinite in the upper section has lower-defect.


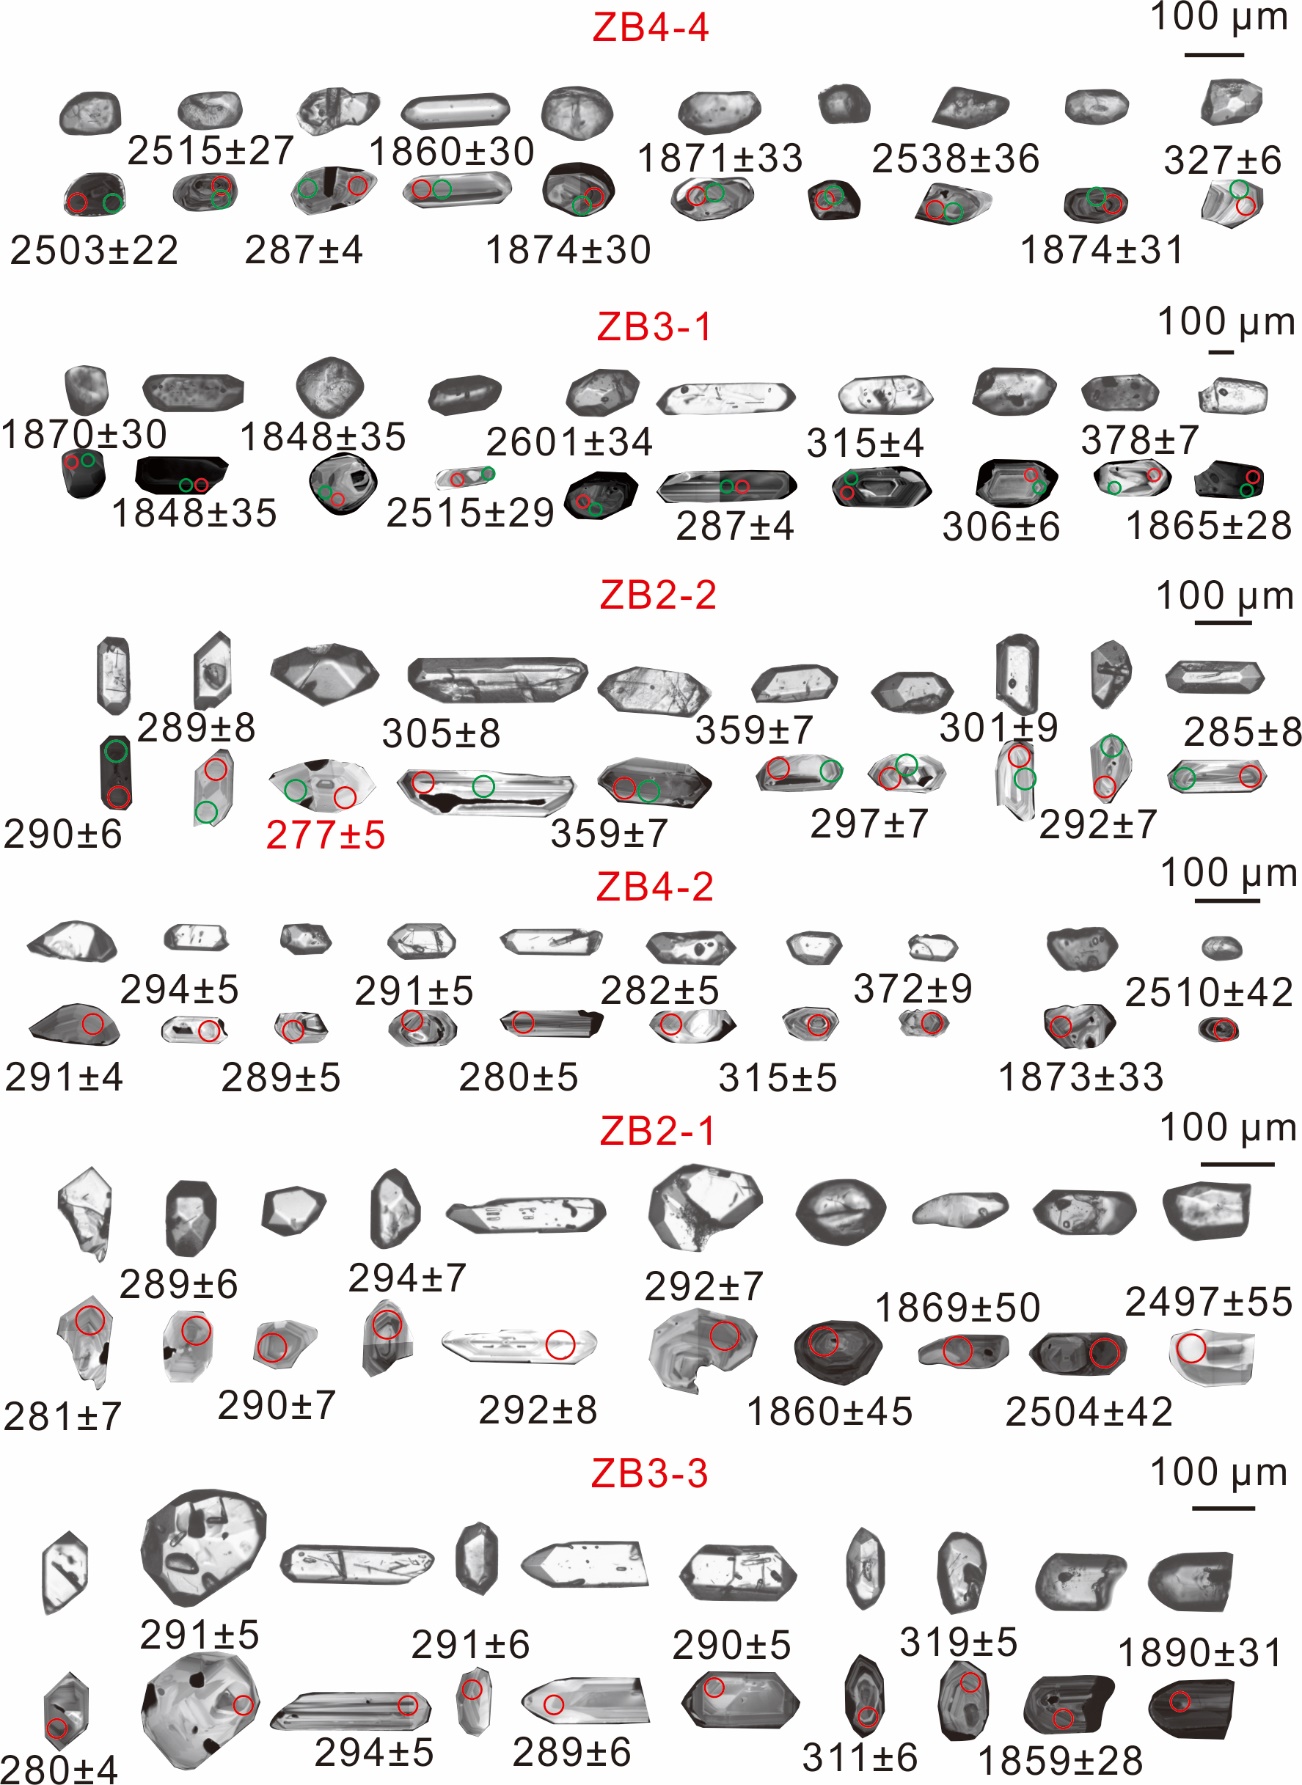


Fig. S5. Representative CL images of detrital zircon crystals from several bauxite-clay deposits in Zibo. Red and green circles represent the U–Pb and Lu–Hf analytical targets, respectively.


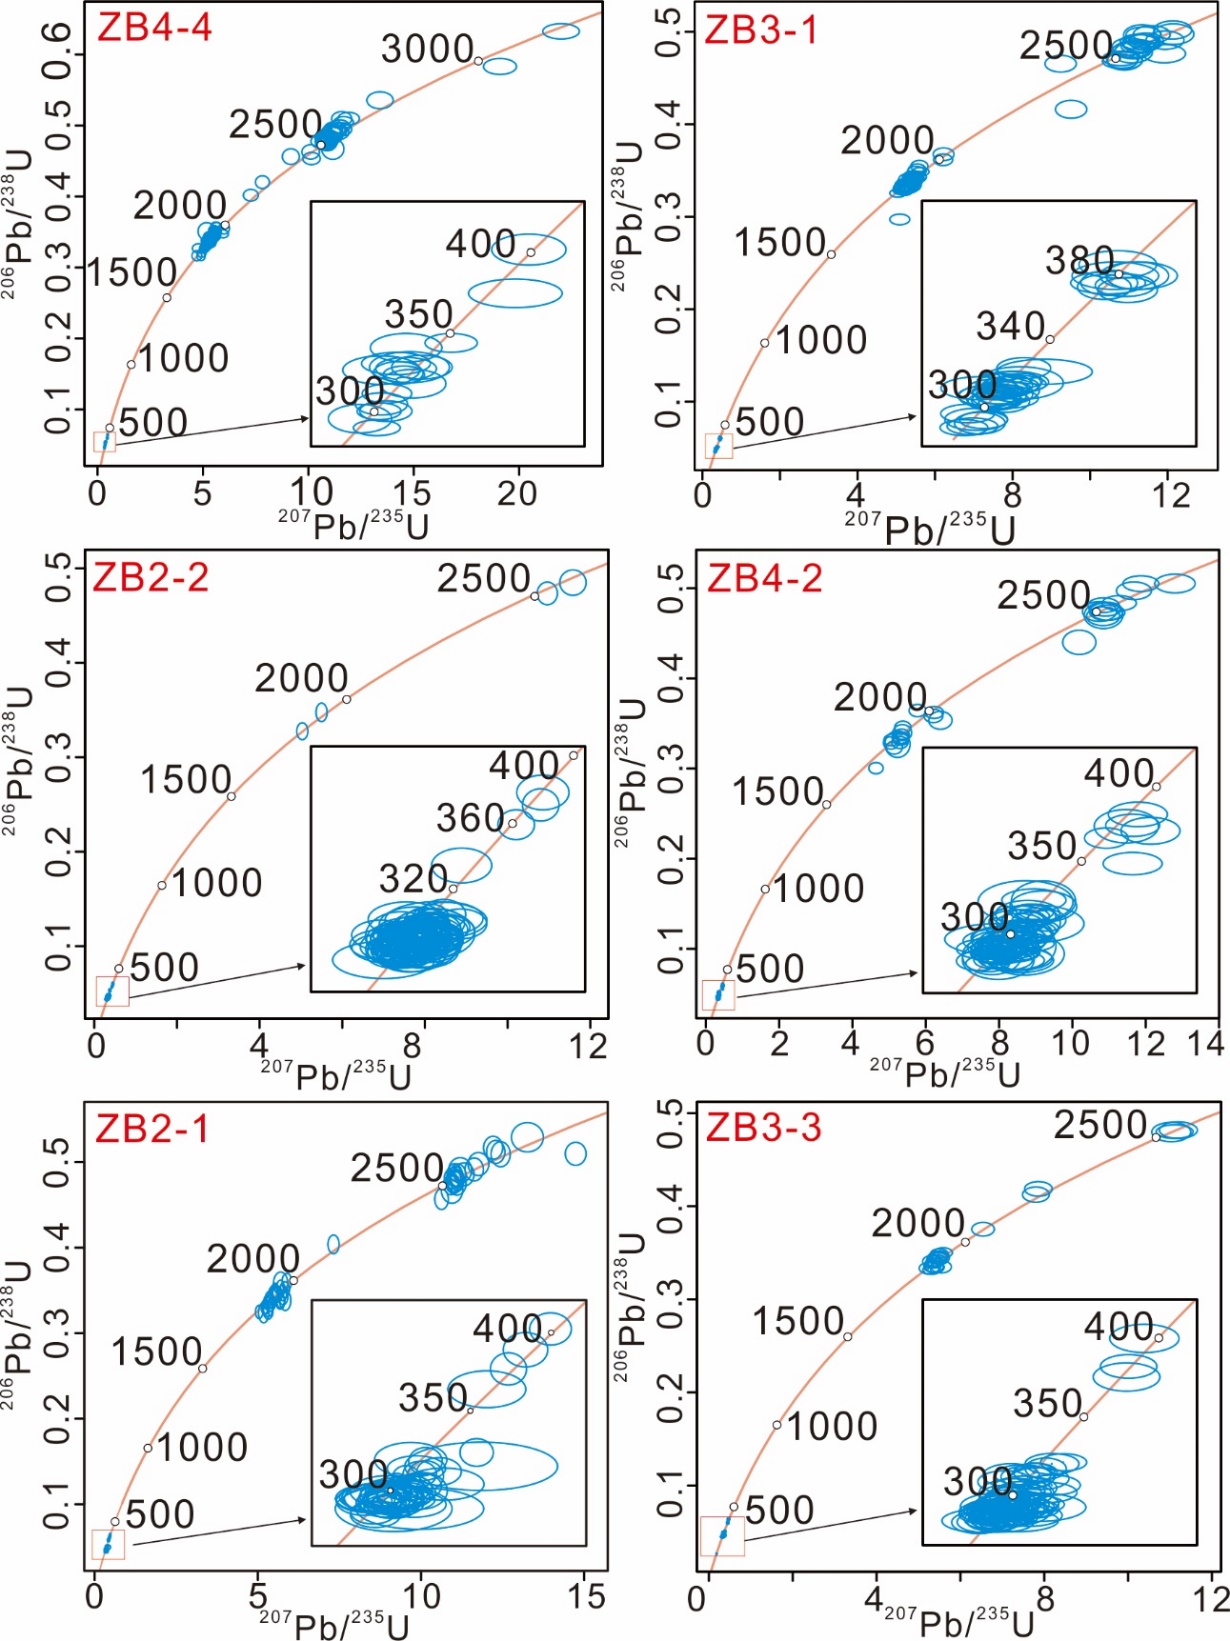


Fig. S6. Concordia diagrams of the U–Pb ages of detrital zircon crystals.


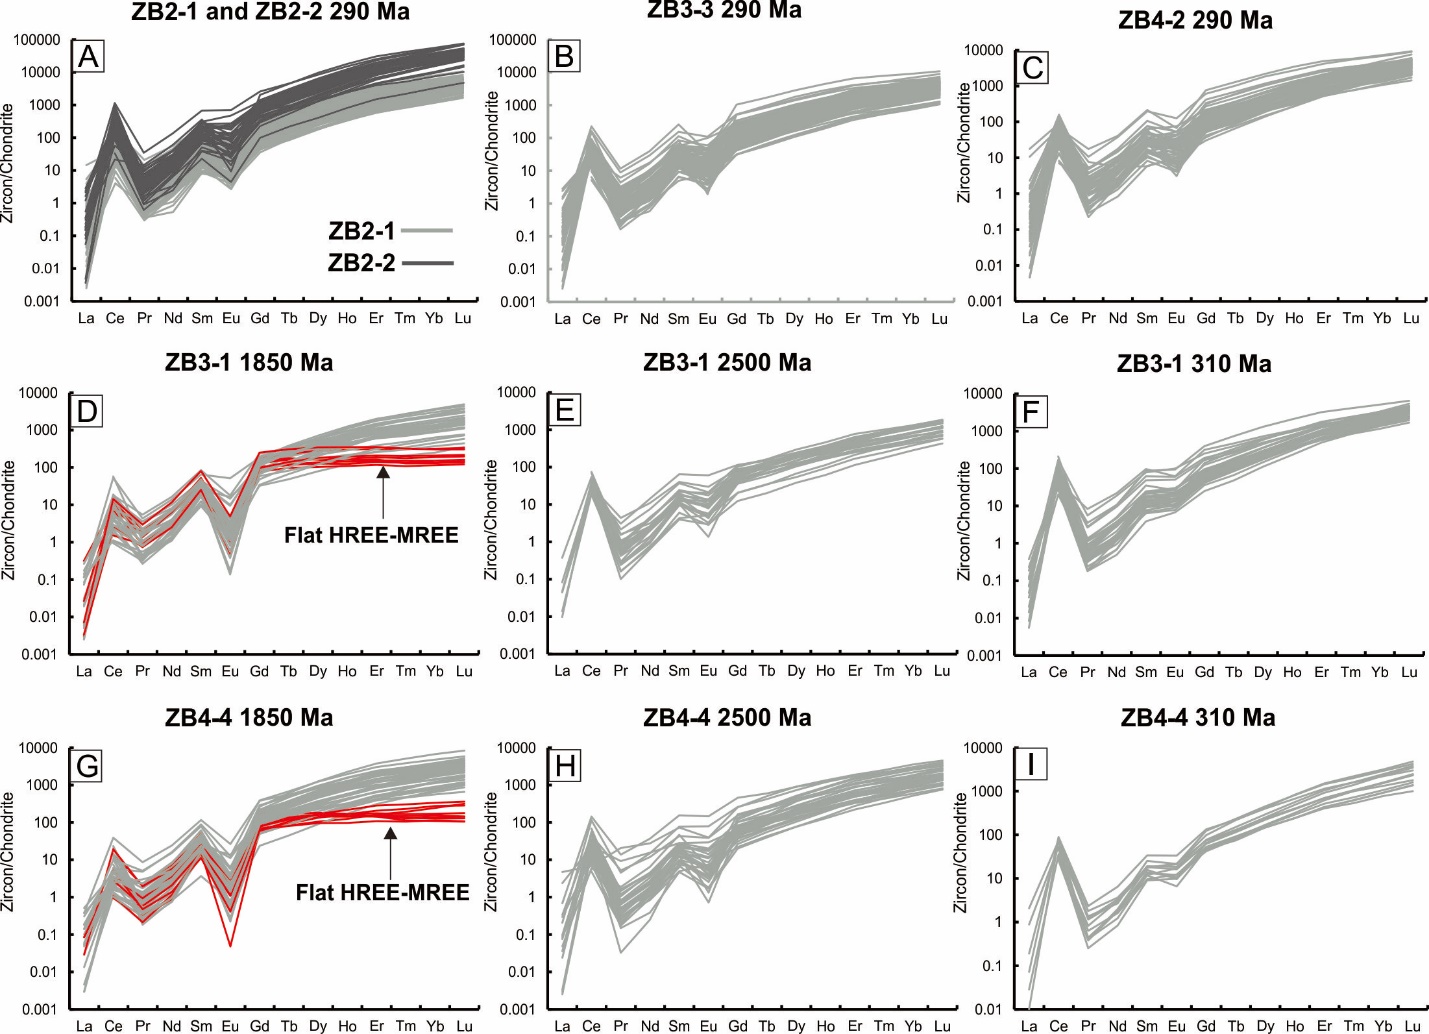


Fig. S7


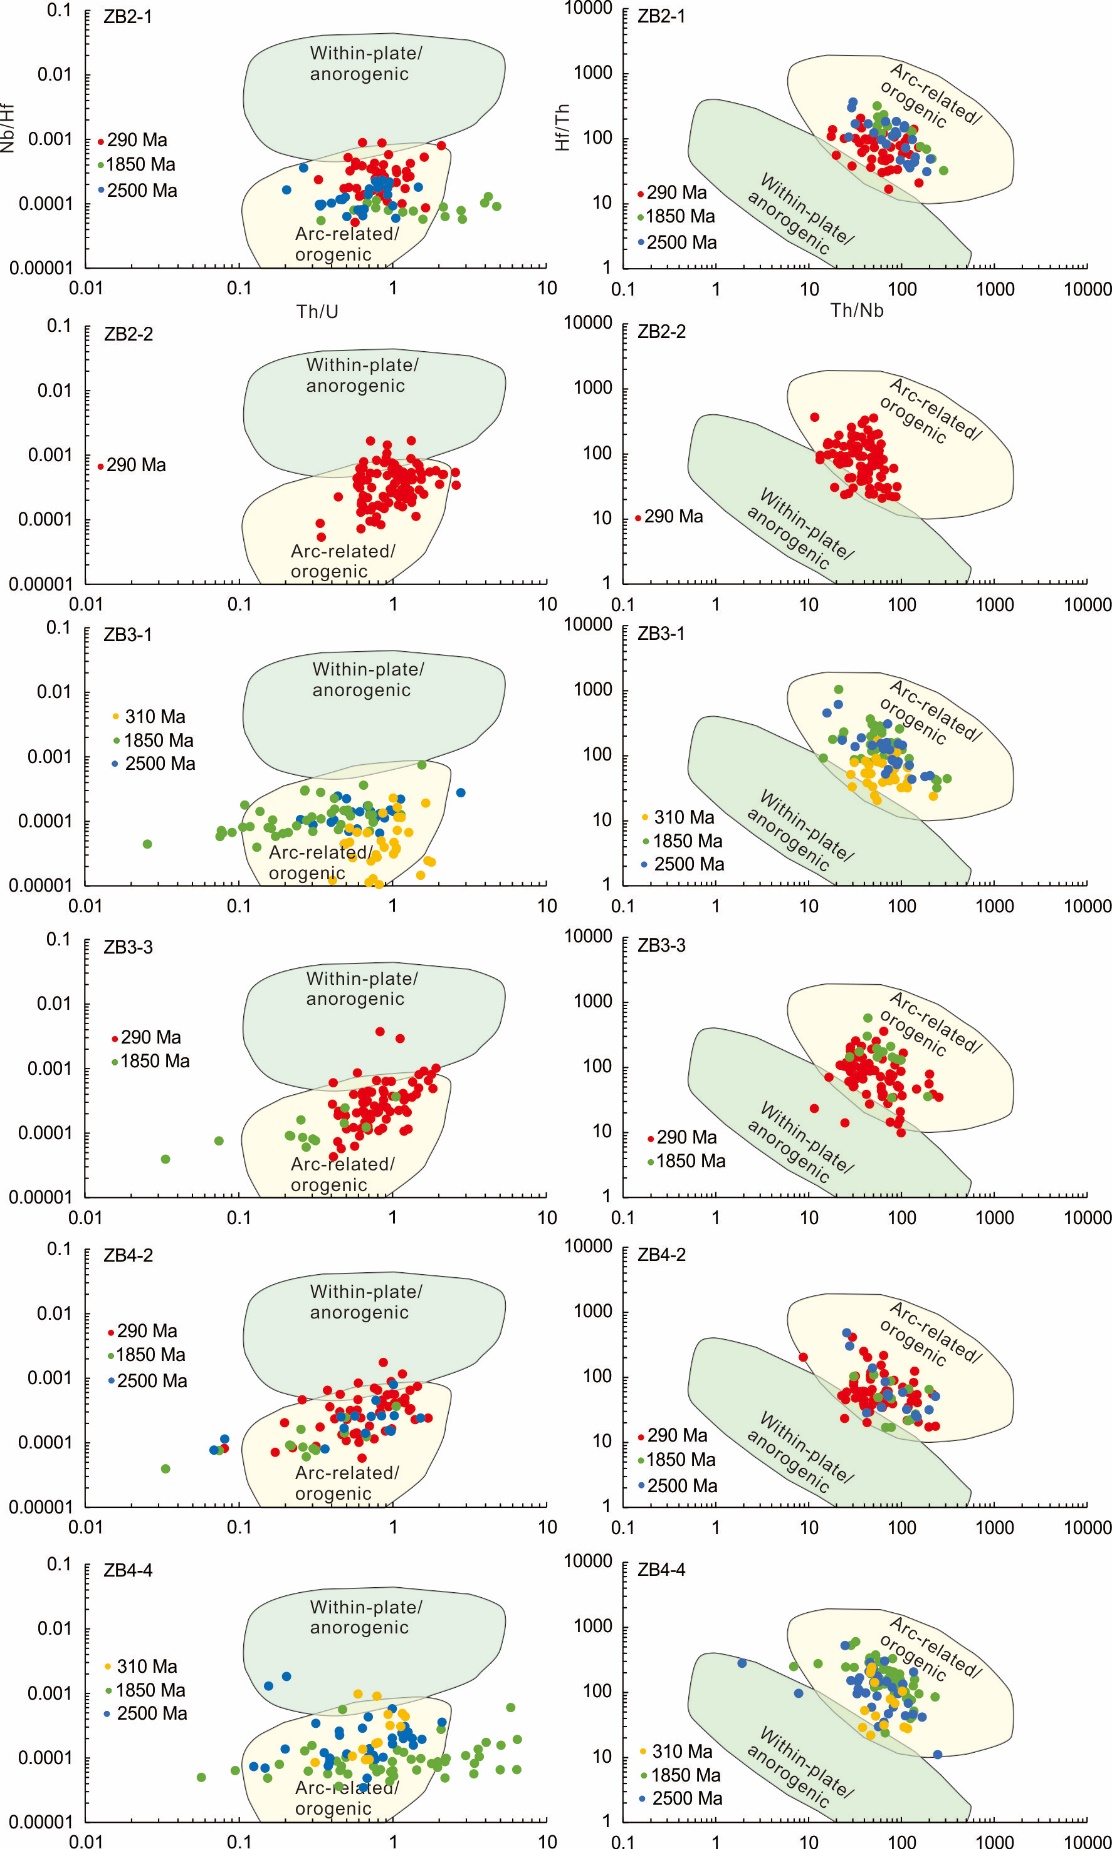


Fig. S8. Th/U versus Nb/Hf and Th/Nb versus Hf/Th for the ca. 290 Ma, 1850Ma, and 2500 Ma zircons from the Zibo bauxite-clay.
