# Supplementary material
Source: publisher figshare collection journal article supplement (https://gsapubs.figshare.com/articles/dataset/_/24470773)
Supplement: Supplementary file 2 [file 1]

Supplementary Table S1. U-Pb ages of the detrital zircons from Zibo bauxite-clay in eastern North China Block

| Spot     | U<br>(ppm) | Th<br>(ppm) | Th/U | <sup>238</sup> U/ <sup>206</sup> Pb | ± 2σ   | <sup>207</sup> Pb/ <sup>206</sup> Pb | ± 2σ   | <sup>206</sup> Pb/ <sup>238</sup> U<br>age<br>(Ma) | ± 2σ | <sup>207</sup> Pb/ <sup>206</sup> Pb<br>age<br>(Ma) | ± 2σ | Concordance | Intersects<br>Concordia | Concordia<br>age<br>(Ma) | ± 2σ |
|----------|------------|-------------|------|-------------------------------------|--------|--------------------------------------|--------|----------------------------------------------------|------|-----------------------------------------------------|------|-------------|-------------------------|--------------------------|------|
| ZB2-1-1  | 335.00     | 71.30       | 0.21 | 3.03                                | 0.0571 | 0.11                                 | 0.0029 | 1836.0                                             | 30.0 | 1863                                                | 46   | 99          | Yes                     | 1845.0                   | 12.7 |
| ZB2-1-2  | 457.60     | 50.41       | 0.11 | 3.08                                | 0.0597 | 0.11                                 | 0.0029 | 1813.0                                             | 31.0 | 1831                                                | 47   | 99          | Yes                     | 1819.5                   | 12.9 |
| ZB2-1-3  | 248.50     | 283.00      | 1.14 | 21.76                               | 0.4736 | 0.05                                 | 0.0029 | 289.6                                              | 6.5  | 260                                                 | 120  | 100         | Yes                     | 289.7                    | 3.1  |
| ZB2-1-4  | 69.70      | 91.20       | 1.31 | 21.52                               | 0.5559 | 0.05                                 | 0.0051 | 292.7                                              | 7.3  | 130                                                 | 180  | 97          | Yes                     | 292.8                    | 3.7  |
| ZB2-1-5  | 328.00     | 119.50      | 0.36 | 2.10                                | 0.0398 | 0.17                                 | 0.0041 | 2507.0                                             | 39.0 | 2521                                                | 42   | 99          | Yes                     | 2514.4                   | 14.3 |
| ZB2-1-6  | 131.00     | 114.70      | 0.88 | 20.17                               | 0.4477 | 0.05                                 | 0.0033 | 311.8                                              | 6.8  | 250                                                 | 130  | 99          | Yes                     | 311.9                    | 3.4  |
| ZB2-1-7  | 136.00     | 182.90      | 1.34 | 21.85                               | 0.4774 | 0.05                                 | 0.0031 | 288.5                                              | 6.2  | 330                                                 | 120  | 95          | Yes                     | 288.6                    | 3.1  |
| ZB2-1-8  | 278.60     | 84.70       | 0.30 | 2.97                                | 0.0601 | 0.12                                 | 0.0033 | 1868.0                                             | 33.0 | 1986                                                | 48   | 97          | Yes                     | 1905.4                   | 14.2 |
| ZB2-1-9  | 132.00     | 124.60      | 0.94 | 21.95                               | 0.4818 | 0.05                                 | 0.0031 | 287.2                                              | 6.2  | 290                                                 | 120  | 98          | Yes                     | 287.3                    | 3.1  |
| ZB2-1-10 | 422.00     | 672.00      | 1.59 | 19.38                               | 0.4507 | 0.08                                 | 0.0053 | 324.3                                              | 7.1  | 1100                                                | 140  | 67          | No                      | 321.3                    | 3.7  |
| ZB2-1-11 | 156.60     | 130.80      | 0.84 | 21.99                               | 0.4835 | 0.05                                 | 0.0031 | 286.7                                              | 6.3  | 310                                                 | 120  | 96          | Yes                     | 286.8                    | 3.1  |
| ZB2-1-12 | 862.00     | 212.10      | 0.25 | 3.02                                | 0.0603 | 0.11                                 | 0.0028 | 1842.0                                             | 32.0 | 1859                                                | 46   | 99          | Yes                     | 1848.7                   | 13.1 |
| ZB2-1-13 | 554.80     | 160.00      | 0.29 | 2.96                                | 0.0839 | 0.12                                 | 0.0037 | 1878.0                                             | 46.0 | 2020                                                | 53   | 96          | Yes                     | 1939.0                   | 18.4 |
| ZB2-1-14 | 212.40     | 117.70      | 0.55 | 21.42                               | 0.5505 | 0.05                                 | 0.0041 | 294.1                                              | 7.3  | 310                                                 | 160  | 98          | Yes                     | 294.3                    | 3.7  |
| ZB2-1-15 | 403.00     | 385.00      | 0.96 | 2.09                                | 0.0423 | 0.17                                 | 0.0041 | 2523.0                                             | 44.0 | 2526                                                | 42   | 100         | Yes                     | 2524.4                   | 14.8 |
| ZB2-1-16 | 164.30     | 236.90      | 1.44 | 22.05                               | 0.4862 | 0.06                                 | 0.0032 | 285.8                                              | 6.2  | 480                                                 | 120  | 90          | No                      | 285.9                    | 3.1  |
| ZB2-1-17 | 921.00     | 515.00      | 0.56 | 2.98                                | 0.0585 | 0.11                                 | 0.0028 | 1866.0                                             | 32.0 | 1859                                                | 45   | 100         | Yes                     | 1865.0                   | 12.9 |
| ZB2-1-18 | 744.00     | 683.00      | 0.92 | 20.41                               | 0.4583 | 0.05                                 | 0.002  | 308.3                                              | 6.6  | 346                                                 | 82   | 98          | Yes                     | 308.6                    | 3.4  |
| ZB2-1-19 | 372.00     | 117.00      | 0.31 | 2.83                                | 0.0552 | 0.12                                 | 0.003  | 1951.0                                             | 33.0 | 1897                                                | 47   | 99          | Yes                     | 1934.5                   | 13.2 |
| ZB2-1-20 | 114.70     | 173.60      | 1.51 | 19.80                               | 0.5882 | 0.05                                 | 0.0042 | 317.3                                              | 9.0  | 190                                                 | 160  | 97          | Yes                     | 317.5                    | 4.6  |
| ZB2-1-21 | 376.90     | 225.90      | 0.60 | 2.11                                | 0.0424 | 0.17                                 | 0.0042 | 2497.0                                             | 42.0 | 2523                                                | 42   | 99          | Yes                     | 2509.9                   | 15.0 |
| ZB2-1-22 | 209.80     | 194.60      | 0.93 | 20.41                               | 0.5831 | 0.06                                 | 0.0047 | 308.1                                              | 8.8  | 410                                                 | 170  | 96          | Yes                     | 308.5                    | 4.3  |
| ZB2-1-23 | 132.10     | 110.50      | 0.84 | 22.40                               | 0.5520 | 0.05                                 | 0.0033 | 281.4                                              | 6.7  | 260                                                 | 130  | 99          | Yes                     | 281.7                    | 3.4  |
| ZB2-1-24 | 235.90     | 240.90      | 1.02 | 2.07                                | 0.0407 | 0.17                                 | 0.0043 | 2540.0                                             | 41.0 | 2507                                                | 44   | 99          | Yes                     | 2527.3                   | 14.9 |
| ZB2-1-25 | 252.30     | 435.00      | 1.72 | 21.54                               | 0.5567 | 0.05                                 | 0.0035 | 292.6                                              | 7.2  | 180                                                 | 150  | 96          | Yes                     | 292.4                    | 3.7  |
| ZB2-1-26 | 379.10     | 138.70      | 0.37 | 2.07                                | 0.0402 | 0.17                                 | 0.0041 | 2543.0                                             | 42.0 | 2504                                                | 42   | 99          | Yes                     | 2525.0                   | 14.4 |

|          |        |        |      |       |        |      |        |        |      |      |     |     |     |        |      |
|----------|--------|--------|------|-------|--------|------|--------|--------|------|------|-----|-----|-----|--------|------|
| ZB2-1-27 | 93.70  | 118.30 | 1.26 | 21.87 | 0.5260 | 0.06 | 0.0039 | 288.2  | 7.1  | 350  | 140 | 94  | Yes | 288.3  | 3.4  |
| ZB2-1-28 | 264.10 | 211.60 | 0.80 | 21.58 | 0.4657 | 0.05 | 0.0025 | 292.0  | 6.2  | 243  | 100 | 99  | Yes | 292.0  | 3.1  |
| ZB2-1-29 | 146.00 | 206.00 | 1.41 | 21.71 | 0.5656 | 0.05 | 0.0035 | 290.2  | 7.1  | 130  | 140 | 95  | Yes | 290.0  | 3.7  |
| ZB2-1-30 | 271.40 | 82.00  | 0.30 | 2.89  | 0.0644 | 0.12 | 0.0032 | 1913.0 | 37.0 | 1905 | 50  | 100 | Yes | 1912.6 | 14.7 |
| ZB2-1-31 | 499.00 | 96.20  | 0.19 | 2.86  | 0.0554 | 0.11 | 0.0028 | 1935.0 | 32.0 | 1860 | 45  | 98  | Yes | 1909.5 | 12.8 |
| ZB2-1-32 | 131.00 | 134.30 | 1.03 | 15.96 | 0.3565 | 0.17 | 0.013  | 391.7  | 8.3  | 2400 | 130 | 22  | No  | 377.7  | 4.2  |
| ZB2-1-33 | 121.80 | 87.90  | 0.72 | 2.06  | 0.0466 | 0.17 | 0.0048 | 2550.0 | 49.0 | 2544 | 48  | 100 | Yes | 2550.0 | 16.8 |
| ZB2-1-34 | 205.40 | 108.20 | 0.53 | 2.93  | 0.0574 | 0.12 | 0.0034 | 1894.0 | 32.0 | 1989 | 49  | 98  | Yes | 1922.6 | 14.0 |
| ZB2-1-35 | 126.9  | 193.3  | 1.52 | 22.17 | 0.6391 | 0.09 | 0.007  | 284.6  | 7.9  | 1260 | 190 | 57  | No  | 279.42 | 4    |
| ZB2-1-36 | 288.20 | 257.20 | 0.89 | 16.25 | 0.3433 | 0.06 | 0.0025 | 384.9  | 7.9  | 365  | 99  | 99  | Yes | 385.2  | 3.9  |
| ZB2-1-37 | 318.00 | 124.40 | 0.39 | 2.48  | 0.0546 | 0.13 | 0.0036 | 2185.0 | 41.0 | 2107 | 48  | 98  | Yes | 2154.6 | 15.2 |
| ZB2-1-38 | 441.00 | 276.80 | 0.63 | 3.03  | 0.0614 | 0.11 | 0.003  | 1838.0 | 32.0 | 1870 | 46  | 99  | Yes | 1850.4 | 13.6 |
| ZB2-1-39 | 78.90  | 72.10  | 0.91 | 1.94  | 0.0412 | 0.17 | 0.0048 | 2683.0 | 45.0 | 2562 | 46  | 97  | Yes | 2623.9 | 16.0 |
| ZB2-1-40 | 460.10 | 165.90 | 0.36 | 2.95  | 0.0628 | 0.12 | 0.0031 | 1881.0 | 36.0 | 1972 | 46  | 98  | Yes | 1914.3 | 14.3 |
| ZB2-1-41 | 179.70 | 253.50 | 1.41 | 22.28 | 0.4963 | 0.05 | 0.0027 | 283.0  | 6.4  | 253  | 110 | 100 | Yes | 283.1  | 3.1  |
| ZB2-1-42 | 149.40 | 85.40  | 0.57 | 21.59 | 0.5595 | 0.05 | 0.0031 | 291.7  | 7.2  | 310  | 130 | 98  | Yes | 292.0  | 3.7  |
| ZB2-1-43 | 124.70 | 125.10 | 1.00 | 1.95  | 0.0420 | 0.17 | 0.0046 | 2663.0 | 45.0 | 2587 | 45  | 98  | Yes | 2625.2 | 15.7 |
| ZB2-1-44 | 77.40  | 38.61  | 0.50 | 1.89  | 0.0500 | 0.18 | 0.0068 | 2734.0 | 58.0 | 2676 | 62  | 98  | Yes | 2712.2 | 20.9 |
| ZB2-1-45 | 122.50 | 122.60 | 1.00 | 20.72 | 0.5152 | 0.05 | 0.0031 | 303.8  | 7.2  | 240  | 120 | 100 | Yes | 303.8  | 3.7  |
| ZB2-1-46 | 80.20  | 92.20  | 1.15 | 2.08  | 0.0432 | 0.17 | 0.0046 | 2529.0 | 44.0 | 2502 | 47  | 100 | Yes | 2521.2 | 15.8 |
| ZB2-1-47 | 227.30 | 134.10 | 0.59 | 2.96  | 0.0631 | 0.12 | 0.0031 | 1874.0 | 35.0 | 1871 | 49  | 100 | Yes | 1876.8 | 14.1 |
| ZB2-1-48 | 546.40 | 90.20  | 0.17 | 2.88  | 0.0622 | 0.12 | 0.0031 | 1920.0 | 36.0 | 1962 | 45  | 99  | Yes | 1937.3 | 14.4 |
| ZB2-1-49 | 176.00 | 117.00 | 0.66 | 21.46 | 0.5986 | 0.05 | 0.0033 | 293.4  | 7.9  | 270  | 130 | 99  | Yes | 293.7  | 4.0  |
| ZB2-1-50 | 287.90 | 204.60 | 0.71 | 21.48 | 0.5074 | 0.05 | 0.0026 | 293.3  | 6.9  | 270  | 100 | 100 | Yes | 293.5  | 3.4  |
| ZB2-1-51 | 253.10 | 196.20 | 0.78 | 21.45 | 0.5061 | 0.05 | 0.0025 | 293.7  | 6.8  | 311  | 99  | 98  | Yes | 294.0  | 3.4  |
| ZB2-1-52 | 69.80  | 69.90  | 1.00 | 20.08 | 0.8468 | 0.06 | 0.0081 | 316.0  | 14.0 | 420  | 280 | 91  | Yes | 313.2  | 6.5  |
| ZB2-1-53 | 55.20  | 49.80  | 0.90 | 21.62 | 0.5608 | 0.05 | 0.0055 | 291.4  | 7.7  | 160  | 190 | 99  | Yes | 291.6  | 3.7  |
| ZB2-1-54 | 95.30  | 115.00 | 1.21 | 21.57 | 0.5586 | 0.05 | 0.0038 | 292.0  | 7.5  | 130  | 150 | 95  | Yes | 291.9  | 3.7  |
| ZB2-1-55 | 196.20 | 78.70  | 0.40 | 2.78  | 0.0617 | 0.12 | 0.0033 | 1981.0 | 38.0 | 1931 | 50  | 99  | Yes | 1967.1 | 14.8 |
| ZB2-1-56 | 359.60 | 127.40 | 0.35 | 21.21 | 0.4500 | 0.05 | 0.0022 | 296.9  | 6.4  | 269  | 89  | 100 | Yes | 297.0  | 3.1  |

|          |        |        |      |       |        |      |        |        |      |      |     |     |     |        |      |
|----------|--------|--------|------|-------|--------|------|--------|--------|------|------|-----|-----|-----|--------|------|
| ZB2-1-57 | 248.90 | 129.00 | 0.52 | 2.10  | 0.0439 | 0.17 | 0.0043 | 2513.0 | 43.0 | 2531 | 43  | 100 | Yes | 2525.0 | 15.4 |
| ZB2-1-58 | 243.30 | 93.30  | 0.38 | 2.85  | 0.0609 | 0.12 | 0.0034 | 1938.0 | 36.0 | 1950 | 50  | 99  | Yes | 1946.2 | 14.7 |
| ZB2-1-59 | 241.00 | 160.00 | 0.66 | 2.06  | 0.0468 | 0.17 | 0.0043 | 2545.0 | 46.0 | 2503 | 44  | 99  | Yes | 2525.9 | 16.0 |
| ZB2-1-60 | 61.90  | 58.00  | 0.94 | 21.55 | 0.6038 | 0.05 | 0.0053 | 292.2  | 7.9  | 170  | 190 | 98  | Yes | 292.4  | 4.0  |
| ZB2-1-61 | 205.00 | 281.00 | 1.37 | 21.05 | 0.4873 | 0.05 | 0.0029 | 299.1  | 7.0  | 318  | 110 | 97  | Yes | 299.4  | 3.4  |
| ZB2-1-62 | 311.80 | 320.00 | 1.03 | 2.01  | 0.0444 | 0.17 | 0.0047 | 2601.0 | 48.0 | 2570 | 45  | 99  | Yes | 2588.6 | 16.3 |
| ZB2-1-63 | 228.70 | 138.20 | 0.60 | 21.50 | 0.5085 | 0.05 | 0.003  | 293.0  | 6.9  | 310  | 120 | 97  | Yes | 293.2  | 3.4  |
| ZB2-1-64 | 133.40 | 95.00  | 0.71 | 2.04  | 0.0456 | 0.17 | 0.0048 | 2574.0 | 46.0 | 2567 | 46  | 100 | Yes | 2573.1 | 16.6 |
| ZB2-1-65 | 612.00 | 422.00 | 0.69 | 20.96 | 0.4835 | 0.05 | 0.0019 | 300.4  | 6.6  | 281  | 78  | 100 | Yes | 300.5  | 3.4  |
| ZB2-1-66 | 449.90 | 447.10 | 0.99 | 19.50 | 0.4565 | 0.06 | 0.0021 | 322.3  | 7.1  | 530  | 77  | 91  | Yes | 322.6  | 3.7  |
| ZB2-1-67 | 677.00 | 396.00 | 0.58 | 20.61 | 0.4671 | 0.05 | 0.0019 | 305.4  | 6.6  | 296  | 77  | 100 | Yes | 305.6  | 3.4  |
| ZB2-1-68 | 72.30  | 90.90  | 1.26 | 21.28 | 0.5888 | 0.05 | 0.0043 | 296.7  | 8.0  | 220  | 160 | 100 | Yes | 296.1  | 4.0  |
| ZB2-1-69 | 341.50 | 237.50 | 0.70 | 20.97 | 0.4837 | 0.06 | 0.0025 | 300.2  | 6.7  | 382  | 93  | 95  | Yes | 300.6  | 3.4  |
| ZB2-1-70 | 512.00 | 241.00 | 0.47 | 15.53 | 0.3375 | 0.05 | 0.0019 | 402.3  | 8.8  | 340  | 77  | 99  | Yes | 401.9  | 4.2  |
| ZB2-1-71 | 130.20 | 98.50  | 0.76 | 2.14  | 0.0594 | 0.17 | 0.0049 | 2471.0 | 55.0 | 2535 | 50  | 98  | Yes | 2512.5 | 18.9 |
| ZB2-1-72 | 133.10 | 79.50  | 0.60 | 21.66 | 0.5632 | 0.05 | 0.0032 | 290.8  | 7.1  | 270  | 120 | 99  | Yes | 291.0  | 3.7  |
| ZB2-1-73 | 584.00 | 645.00 | 1.10 | 3.09  | 0.0924 | 0.12 | 0.0037 | 1807.0 | 47.0 | 1901 | 55  | 98  | Yes | 1845.8 | 18.9 |
| ZB2-1-74 | 690.00 | 431.10 | 0.62 | 20.49 | 0.5459 | 0.06 | 0.0022 | 306.8  | 8.2  | 385  | 86  | 96  | Yes | 307.6  | 4.0  |
| ZB2-1-75 | 93.50  | 91.30  | 0.98 | 22.08 | 0.8772 | 0.06 | 0.0073 | 285.6  | 11.0 | 440  | 260 | 92  | Yes | 285.5  | 5.6  |
| ZB2-1-76 | 689.00 | 287.60 | 0.42 | 2.19  | 0.0475 | 0.17 | 0.0044 | 2426.0 | 45.0 | 2543 | 43  | 97  | Yes | 2484.7 | 16.1 |
| ZB2-1-77 | 87.40  | 90.70  | 1.04 | 21.55 | 0.6038 | 0.05 | 0.0042 | 292.1  | 8.0  | 160  | 150 | 97  | Yes | 292.4  | 4.0  |
| ZB2-1-78 | 269.20 | 75.00  | 0.28 | 2.98  | 0.0693 | 0.12 | 0.0034 | 1862.0 | 38.0 | 1892 | 49  | 99  | Yes | 1875.1 | 15.5 |
| ZB2-1-79 | 252.80 | 200.80 | 0.79 | 16.75 | 0.4209 | 0.05 | 0.0024 | 373.8  | 8.9  | 346  | 94  | 100 | Yes | 374.0  | 4.6  |
| ZB2-1-80 | 261.20 | 117.70 | 0.45 | 2.79  | 0.0858 | 0.12 | 0.0039 | 1971.0 | 53.0 | 1894 | 67  | 98  | Yes | 1939.3 | 19.2 |
| ZB2-1-81 | 71.20  | 129.30 | 1.82 | 21.23 | 0.6311 | 0.05 | 0.0048 | 296.6  | 8.4  | 170  | 170 | 98  | Yes | 296.8  | 4.3  |
| ZB2-1-82 | 328.80 | 285.30 | 0.87 | 1.96  | 0.0423 | 0.21 | 0.0054 | 2653.0 | 48.0 | 2897 | 42  | 95  | Yes | 2787.7 | 16.9 |
| ZB2-1-83 | 724.00 | 334.20 | 0.46 | 19.87 | 0.4737 | 0.05 | 0.0019 | 316.5  | 7.1  | 310  | 79  | 99  | Yes | 316.7  | 3.7  |
| ZB2-1-84 | 110.30 | 178.00 | 1.61 | 2.11  | 0.0488 | 0.17 | 0.005  | 2502.0 | 47.0 | 2547 | 50  | 99  | Yes | 2527.6 | 17.5 |
| ZB2-1-85 | 181.10 | 128.80 | 0.71 | 21.86 | 0.5255 | 0.05 | 0.003  | 288.3  | 6.5  | 250  | 120 | 99  | Yes | 288.4  | 3.4  |
| ZB2-1-86 | 530.00 | 469.30 | 0.89 | 2.09  | 0.0481 | 0.17 | 0.0044 | 2516.0 | 47.0 | 2530 | 45  | 100 | Yes | 2526.6 | 16.3 |

|           |        |        |      |       |        |      |        |        |      |      |     |     |     |        |      |
|-----------|--------|--------|------|-------|--------|------|--------|--------|------|------|-----|-----|-----|--------|------|
| ZB2-1-87  | 527.20 | 124.20 | 0.24 | 2.10  | 0.0484 | 0.17 | 0.0043 | 2511.0 | 48.0 | 2528 | 44  | 100 | Yes | 2524.4 | 16.1 |
| ZB2-1-88  | 252.70 | 132.60 | 0.52 | 22.08 | 0.9746 | 0.05 | 0.0054 | 285.0  | 13.0 | 360  | 240 | 96  | Yes | 285.8  | 6.2  |
| ZB2-1-89  | 155.80 | 59.60  | 0.38 | 2.90  | 0.0666 | 0.12 | 0.0032 | 1906.0 | 38.0 | 1869 | 50  | 99  | Yes | 1897.5 | 14.9 |
| ZB2-1-90  | 505.00 | 96.40  | 0.19 | 2.88  | 0.0673 | 0.12 | 0.0031 | 1917.0 | 39.0 | 1879 | 48  | 99  | Yes | 1905.8 | 14.9 |
| ZB2-1-91  | 216.60 | 258.00 | 1.19 | 3.04  | 0.0713 | 0.12 | 0.0033 | 1830.0 | 37.0 | 1910 | 50  | 98  | Yes | 1862.3 | 15.5 |
| ZB2-1-92  | 313.90 | 711.00 | 2.27 | 21.30 | 0.4992 | 0.05 | 0.0024 | 295.6  | 6.9  | 235  | 98  | 98  | Yes | 295.7  | 3.4  |
| ZB2-1-93  | 170.10 | 162.70 | 0.96 | 20.88 | 0.6102 | 0.06 | 0.0043 | 301.7  | 8.4  | 470  | 160 | 92  | Yes | 301.7  | 4.3  |
| ZB2-1-94  | 229.90 | 181.60 | 0.79 | 20.30 | 0.4947 | 0.06 | 0.0027 | 309.8  | 7.1  | 397  | 100 | 95  | Yes | 310.2  | 3.7  |
| ZB2-1-95  | 227.00 | 149.70 | 0.66 | 21.41 | 0.5042 | 0.05 | 0.0025 | 294.2  | 6.9  | 253  | 100 | 100 | Yes | 294.3  | 3.4  |
| ZB2-1-96  | 121.00 | 83.80  | 0.69 | 19.84 | 0.5905 | 0.14 | 0.011  | 316.6  | 9.2  | 2000 | 130 | 31  | No  | 303.4  | 4.5  |
| ZB2-1-97  | 385.30 | 129.10 | 0.34 | 3.07  | 0.0761 | 0.12 | 0.0033 | 1819.0 | 39.0 | 1923 | 50  | 97  | Yes | 1859.6 | 16.2 |
| ZB2-1-98  | 86.60  | 118.00 | 1.36 | 17.24 | 0.4756 | 0.05 | 0.0036 | 363.6  | 9.7  | 240  | 140 | 97  | Yes | 363.4  | 4.9  |
| ZB2-1-99  | 38.70  | 59.00  | 1.52 | 2.04  | 0.0499 | 0.17 | 0.0053 | 2569.0 | 50.0 | 2497 | 55  | 99  | Yes | 2543.1 | 18.3 |
| ZB2-1-100 | 135.80 | 75.50  | 0.56 | 1.96  | 0.0463 | 0.18 | 0.0048 | 2650.0 | 49.0 | 2620 | 45  | 99  | Yes | 2634.7 | 16.8 |
| ZB2-1-101 | 414.00 | 323.00 | 0.78 | 2.06  | 0.0469 | 0.17 | 0.0043 | 2544.0 | 48.0 | 2517 | 44  | 99  | Yes | 2531.0 | 15.9 |
| ZB2-1-102 | 282.30 | 300.70 | 1.07 | 21.61 | 0.5605 | 0.05 | 0.0022 | 291.5  | 7.2  | 237  | 94  | 98  | Yes | 291.4  | 3.7  |
| ZB2-1-103 | 439.00 | 195.20 | 0.44 | 2.95  | 0.0688 | 0.11 | 0.003  | 1879.0 | 38.0 | 1871 | 50  | 100 | Yes | 1878.0 | 14.8 |
| ZB2-1-104 | 209.80 | 77.80  | 0.37 | 2.89  | 0.0670 | 0.12 | 0.0032 | 1914.0 | 38.0 | 1875 | 50  | 99  | Yes | 1900.4 | 15.0 |
| ZB2-1-105 | 448.40 | 74.50  | 0.17 | 2.98  | 0.0721 | 0.12 | 0.0031 | 1865.0 | 40.0 | 1886 | 49  | 99  | Yes | 1875.8 | 15.4 |
| ZB2-1-106 | 318.70 | 277.90 | 0.87 | 16.08 | 0.3877 | 0.05 | 0.0021 | 389.1  | 9.1  | 313  | 84  | 98  | Yes | 388.6  | 4.5  |
| ZB2-1-107 | 527.00 | 92.50  | 0.18 | 2.90  | 0.0679 | 0.12 | 0.003  | 1910.0 | 39.0 | 1892 | 48  | 100 | Yes | 1905.2 | 14.8 |
| ZB2-1-108 | 570.10 | 375.30 | 0.66 | 16.62 | 0.3868 | 0.05 | 0.0019 | 376.5  | 8.3  | 331  | 79  | 99  | Yes | 376.5  | 4.2  |
| ZB2-1-109 | 449.00 | 417.60 | 0.93 | 21.19 | 0.7182 | 0.06 | 0.0031 | 297.0  | 9.6  | 460  | 120 | 94  | Yes | 297.6  | 4.9  |
| ZB2-1-110 | 154.10 | 95.80  | 0.62 | 21.31 | 0.5449 | 0.05 | 0.0031 | 295.5  | 7.7  | 300  | 120 | 98  | Yes | 295.8  | 3.7  |
| ZB2-2-1   | 319.80 | 436.00 | 1.36 | 20.78 | 0.4317 | 0.05 | 0.0021 | 303.0  | 6.2  | 278  | 88  | 100 | Yes | 303.1  | 3.1  |
| ZB2-2-2   | 76.40  | 65.70  | 0.86 | 21.64 | 0.5617 | 0.05 | 0.0044 | 291.2  | 7.2  | 160  | 170 | 96  | Yes | 291.3  | 3.7  |
| ZB2-2-3   | 120.00 | 123.70 | 1.03 | 21.72 | 0.5189 | 0.05 | 0.0035 | 290.1  | 6.9  | 130  | 140 | 94  | Yes | 289.9  | 3.4  |
| ZB2-2-4   | 358.30 | 310.70 | 0.87 | 22.03 | 0.4318 | 0.05 | 0.002  | 286.2  | 5.5  | 301  | 85  | 99  | Yes | 286.4  | 2.7  |
| ZB2-2-5   | 110.60 | 105.80 | 0.96 | 21.22 | 0.4954 | 0.06 | 0.0037 | 296.8  | 6.5  | 330  | 140 | 96  | Yes | 296.9  | 3.4  |
| ZB2-2-6   | 515.00 | 494.00 | 0.96 | 21.74 | 0.4255 | 0.05 | 0.0019 | 289.8  | 5.5  | 297  | 81  | 99  | Yes | 290.0  | 2.8  |

|          |        |        |      |       |        |      |        |       |      |      |     |     |     |       |     |
|----------|--------|--------|------|-------|--------|------|--------|-------|------|------|-----|-----|-----|-------|-----|
| ZB2-2-7  | 221.40 | 490.00 | 2.21 | 21.89 | 0.4599 | 0.05 | 0.0023 | 288.0 | 5.9  | 221  | 94  | 98  | Yes | 287.9 | 3.0 |
| ZB2-2-8  | 109.90 | 73.10  | 0.67 | 22.06 | 0.4867 | 0.05 | 0.0033 | 285.8 | 6.4  | 190  | 130 | 98  | Yes | 285.8 | 3.1 |
| ZB2-2-9  | 113.70 | 104.60 | 0.92 | 22.23 | 0.5437 | 0.05 | 0.0038 | 283.6 | 6.8  | 140  | 140 | 97  | Yes | 283.6 | 3.4 |
| ZB2-2-10 | 86.90  | 122.20 | 1.41 | 21.83 | 0.5718 | 0.05 | 0.0055 | 288.7 | 7.3  | 280  | 200 | 97  | Yes | 288.8 | 3.7 |
| ZB2-2-11 | 182.00 | 176.00 | 0.97 | 21.28 | 0.5885 | 0.05 | 0.0037 | 296.1 | 8.0  | 290  | 140 | 99  | Yes | 296.2 | 4.0 |
| ZB2-2-12 | 175.20 | 207.20 | 1.18 | 22.12 | 0.4895 | 0.05 | 0.003  | 285.0 | 6.3  | 250  | 120 | 100 | Yes | 285.1 | 3.1 |
| ZB2-2-13 | 408.80 | 636.00 | 1.56 | 20.96 | 0.4393 | 0.05 | 0.002  | 300.4 | 6.2  | 304  | 80  | 99  | Yes | 300.6 | 3.1 |
| ZB2-2-14 | 436.00 | 304.00 | 0.70 | 21.07 | 0.5330 | 0.06 | 0.0035 | 298.8 | 7.4  | 500  | 130 | 92  | Yes | 298.9 | 3.7 |
| ZB2-2-15 | 145.50 | 140.50 | 0.97 | 21.82 | 0.4763 | 0.05 | 0.0032 | 288.8 | 6.2  | 260  | 120 | 99  | Yes | 288.9 | 3.1 |
| ZB2-2-16 | 216.90 | 349.40 | 1.61 | 22.04 | 0.4856 | 0.05 | 0.0026 | 286.0 | 6.2  | 243  | 100 | 100 | Yes | 286.1 | 3.1 |
| ZB2-2-17 | 144.70 | 154.60 | 1.07 | 21.54 | 0.5105 | 0.05 | 0.0032 | 292.4 | 6.8  | 250  | 120 | 100 | Yes | 292.6 | 3.4 |
| ZB2-2-18 | 64.60  | 53.47  | 0.83 | 22.02 | 0.5819 | 0.05 | 0.0043 | 286.2 | 7.4  | 50   | 160 | 92  | Yes | 286.1 | 3.7 |
| ZB2-2-19 | 119.10 | 160.10 | 1.34 | 21.92 | 0.5283 | 0.05 | 0.0034 | 287.6 | 6.8  | 200  | 130 | 99  | Yes | 287.7 | 3.4 |
| ZB2-2-20 | 118.70 | 338.00 | 2.85 | 21.51 | 0.5087 | 0.05 | 0.0038 | 293.0 | 6.7  | 190  | 140 | 99  | Yes | 293.0 | 3.4 |
| ZB2-2-21 | 159.90 | 230.90 | 1.44 | 21.23 | 0.4956 | 0.05 | 0.0027 | 296.7 | 6.7  | 285  | 110 | 99  | Yes | 296.9 | 3.4 |
| ZB2-2-22 | 100.40 | 122.90 | 1.22 | 21.33 | 0.5458 | 0.07 | 0.0044 | 295.3 | 7.3  | 690  | 140 | 81  | No  | 294.4 | 3.7 |
| ZB2-2-23 | 73.70  | 86.90  | 1.18 | 21.55 | 0.5571 | 0.05 | 0.004  | 292.3 | 7.2  | 200  | 150 | 99  | Yes | 292.5 | 3.7 |
| ZB2-2-24 | 161.50 | 192.80 | 1.19 | 21.83 | 0.6197 | 0.06 | 0.0035 | 288.8 | 7.9  | 370  | 130 | 96  | Yes | 288.9 | 4.0 |
| ZB2-2-25 | 167.50 | 188.00 | 1.12 | 21.69 | 0.4703 | 0.05 | 0.0028 | 290.6 | 6.2  | 160  | 110 | 96  | Yes | 290.4 | 3.1 |
| ZB2-2-26 | 117.70 | 75.60  | 0.64 | 21.62 | 0.5142 | 0.05 | 0.0033 | 291.4 | 6.8  | 250  | 130 | 99  | Yes | 291.5 | 3.4 |
| ZB2-2-27 | 117.50 | 103.50 | 0.88 | 21.56 | 0.5111 | 0.05 | 0.0041 | 292.2 | 6.8  | 200  | 160 | 98  | Yes | 292.3 | 3.4 |
| ZB2-2-28 | 78.90  | 103.00 | 1.31 | 21.31 | 0.5451 | 0.05 | 0.0041 | 295.5 | 7.5  | 280  | 150 | 98  | Yes | 295.7 | 3.7 |
| ZB2-2-29 | 70.70  | 61.30  | 0.87 | 15.27 | 0.4895 | 0.28 | 0.016  | 408.0 | 13.0 | 3272 | 100 | -2  | No  | 342.3 | 5.9 |
| ZB2-2-30 | 415.70 | 417.50 | 1.00 | 21.56 | 0.4602 | 0.05 | 0.0019 | 292.2 | 6.1  | 252  | 79  | 99  | Yes | 292.2 | 3.0 |
| ZB2-2-31 | 78.90  | 94.20  | 1.19 | 22.16 | 0.5894 | 0.06 | 0.0047 | 284.4 | 7.2  | 270  | 170 | 97  | Yes | 284.6 | 3.7 |
| ZB2-2-32 | 368.50 | 331.90 | 0.90 | 17.48 | 0.3666 | 0.05 | 0.0022 | 358.6 | 7.4  | 349  | 88  | 100 | Yes | 358.8 | 3.7 |
| ZB2-2-33 | 150.10 | 119.20 | 0.79 | 21.51 | 0.6475 | 0.05 | 0.0045 | 293.2 | 8.4  | 340  | 170 | 97  | Yes | 293.1 | 4.3 |
| ZB2-2-34 | 216.60 | 174.40 | 0.81 | 21.56 | 0.5111 | 0.05 | 0.0024 | 292.3 | 6.7  | 279  | 99  | 100 | Yes | 292.4 | 3.4 |
| ZB2-2-35 | 22.37  | 19.63  | 0.88 | 21.23 | 0.7212 | 0.05 | 0.0079 | 296.4 | 9.8  | -180 | 280 | 83  | No  | 296.5 | 4.9 |
| ZB2-2-36 | 63.58  | 50.02  | 0.79 | 22.27 | 0.5952 | 0.05 | 0.0047 | 283.0 | 7.3  | 180  | 170 | 99  | Yes | 283.2 | 3.7 |

|          |        |        |      |       |        |      |        |        |      |      |     |     |     |        |      |
|----------|--------|--------|------|-------|--------|------|--------|--------|------|------|-----|-----|-----|--------|------|
| ZB2-2-37 | 230.40 | 303.30 | 1.32 | 2.11  | 0.0437 | 0.17 | 0.0043 | 2497.0 | 43.0 | 2529 | 45  | 99  | Yes | 2513.6 | 15.4 |
| ZB2-2-38 | 98.40  | 115.80 | 1.18 | 22.52 | 0.5577 | 0.05 | 0.0041 | 280.0  | 6.7  | 170  | 160 | 99  | Yes | 280.1  | 3.4  |
| ZB2-2-39 | 175.80 | 197.70 | 1.12 | 16.56 | 0.3839 | 0.06 | 0.0028 | 377.9  | 8.3  | 335  | 110 | 100 | Yes | 378.2  | 4.3  |
| ZB2-2-40 | 255.00 | 374.00 | 1.47 | 21.80 | 0.5226 | 0.06 | 0.0025 | 289.1  | 6.6  | 355  | 96  | 96  | Yes | 289.5  | 3.4  |
| ZB2-2-41 | 91.30  | 131.60 | 1.44 | 20.83 | 0.5642 | 0.05 | 0.004  | 302.2  | 7.8  | 300  | 150 | 98  | Yes | 302.4  | 4.0  |
| ZB2-2-42 | 176.50 | 289.30 | 1.64 | 21.48 | 0.5076 | 0.05 | 0.0029 | 293.2  | 6.8  | 260  | 110 | 100 | Yes | 293.4  | 3.4  |
| ZB2-2-43 | 87.32  | 189.50 | 2.17 | 21.53 | 0.5562 | 0.05 | 0.0038 | 292.6  | 7.6  | 230  | 140 | 99  | Yes | 292.8  | 3.7  |
| ZB2-2-44 | 119.60 | 80.90  | 0.68 | 21.10 | 0.6231 | 0.05 | 0.0043 | 298.7  | 8.8  | 180  | 170 | 96  | Yes | 298.5  | 4.3  |
| ZB2-2-45 | 137.50 | 231.30 | 1.68 | 22.00 | 0.5325 | 0.05 | 0.0033 | 286.4  | 6.9  | 180  | 130 | 98  | Yes | 286.5  | 3.4  |
| ZB2-2-46 | 223.60 | 156.00 | 0.70 | 21.34 | 0.5012 | 0.05 | 0.0027 | 295.1  | 6.9  | 305  | 110 | 98  | Yes | 295.4  | 3.4  |
| ZB2-2-47 | 64.50  | 78.50  | 1.22 | 20.88 | 0.6102 | 0.05 | 0.0046 | 301.2  | 8.7  | 50   | 180 | 91  | Yes | 301.3  | 4.3  |
| ZB2-2-48 | 200.90 | 462.00 | 2.30 | 21.65 | 0.9370 | 0.05 | 0.0045 | 291.0  | 12.0 | 200  | 180 | 98  | Yes | 291.0  | 6.1  |
| ZB2-2-49 | 50.42  | 83.50  | 1.66 | 21.74 | 0.6144 | 0.05 | 0.0051 | 290.0  | 8.3  | -70  | 200 | 87  | No  | 289.3  | 4.0  |
| ZB2-2-50 | 93.30  | 64.60  | 0.69 | 21.81 | 0.5708 | 0.05 | 0.0036 | 288.9  | 7.7  | 180  | 140 | 98  | Yes | 288.9  | 3.7  |
| ZB2-2-51 | 476.00 | 305.00 | 0.64 | 17.36 | 0.4220 | 0.06 | 0.0024 | 361.1  | 8.7  | 646  | 83  | 88  | No  | 360.9  | 4.3  |
| ZB2-2-52 | 84.60  | 62.80  | 0.74 | 22.57 | 0.6624 | 0.05 | 0.0042 | 279.3  | 8.3  | 270  | 160 | 99  | Yes | 279.6  | 4.0  |
| ZB2-2-53 | 166.60 | 178.80 | 1.07 | 22.29 | 0.5464 | 0.05 | 0.0031 | 282.9  | 6.5  | 170  | 120 | 97  | Yes | 282.9  | 3.4  |
| ZB2-2-54 | 103.90 | 117.90 | 1.13 | 18.80 | 0.4947 | 0.05 | 0.0035 | 333.8  | 8.5  | 190  | 130 | 96  | Yes | 333.9  | 4.3  |
| ZB2-2-55 | 268.00 | 187.00 | 0.70 | 20.97 | 0.4837 | 0.05 | 0.0027 | 300.3  | 6.8  | 240  | 100 | 99  | Yes | 300.3  | 3.4  |
| ZB2-2-56 | 215.00 | 124.70 | 0.58 | 2.88  | 0.0662 | 0.11 | 0.0031 | 1921.0 | 38.0 | 1874 | 48  | 99  | Yes | 1905.1 | 14.8 |
| ZB2-2-57 | 175.90 | 185.30 | 1.05 | 21.61 | 0.5138 | 0.05 | 0.0026 | 291.5  | 6.8  | 215  | 110 | 98  | Yes | 291.5  | 3.4  |
| ZB2-2-58 | 40.90  | 64.00  | 1.56 | 20.92 | 0.6565 | 0.06 | 0.0064 | 301.0  | 9.4  | 130  | 210 | 98  | Yes | 301.1  | 4.6  |
| ZB2-2-59 | 301.60 | 335.20 | 1.11 | 21.86 | 0.4780 | 0.05 | 0.0022 | 288.3  | 6.4  | 209  | 92  | 98  | Yes | 288.1  | 3.1  |
| ZB2-2-60 | 67.50  | 45.89  | 0.68 | 22.32 | 0.6477 | 0.06 | 0.0041 | 282.6  | 7.8  | 300  | 150 | 97  | Yes | 282.7  | 4.0  |
| ZB2-2-61 | 56.20  | 81.60  | 1.45 | 21.55 | 0.6503 | 0.05 | 0.005  | 292.4  | 8.7  | 140  | 180 | 97  | Yes | 292.4  | 4.3  |
| ZB2-2-62 | 41.26  | 52.10  | 1.26 | 22.17 | 0.6391 | 0.05 | 0.0057 | 284.2  | 8.3  | 100  | 200 | 96  | Yes | 284.4  | 4.0  |
| ZB2-2-63 | 173.00 | 130.00 | 0.75 | 21.75 | 0.5203 | 0.05 | 0.0029 | 289.7  | 7.0  | 220  | 110 | 98  | Yes | 289.8  | 3.4  |
| ZB2-2-64 | 108.90 | 104.00 | 0.96 | 21.06 | 0.5323 | 0.05 | 0.0035 | 298.9  | 7.3  | 310  | 130 | 98  | Yes | 299.2  | 3.7  |
| ZB2-2-65 | 132.20 | 166.10 | 1.26 | 22.08 | 0.4873 | 0.05 | 0.0031 | 285.6  | 6.3  | 250  | 120 | 99  | Yes | 285.7  | 3.1  |
| ZB2-2-66 | 384.20 | 240.00 | 0.62 | 16.90 | 0.3714 | 0.06 | 0.0021 | 370.4  | 8.1  | 396  | 82  | 98  | Yes | 371.0  | 4.0  |

|          |        |        |      |       |        |      |        |        |      |      |     |     |     |        |      |
|----------|--------|--------|------|-------|--------|------|--------|--------|------|------|-----|-----|-----|--------|------|
| ZB2-2-67 | 368.40 | 524.00 | 1.42 | 22.36 | 0.5498 | 0.05 | 0.0022 | 282.0  | 6.5  | 279  | 86  | 100 | Yes | 282.2  | 3.4  |
| ZB2-2-68 | 173.90 | 506.00 | 2.91 | 20.67 | 0.5125 | 0.06 | 0.0031 | 304.6  | 7.5  | 320  | 120 | 99  | Yes | 304.8  | 3.7  |
| ZB2-2-69 | 89.30  | 112.90 | 1.26 | 21.57 | 0.5586 | 0.05 | 0.0037 | 292.0  | 7.3  | 30   | 140 | 91  | Yes | 291.6  | 3.7  |
| ZB2-2-70 | 133.90 | 143.20 | 1.07 | 21.60 | 0.5598 | 0.05 | 0.0031 | 291.7  | 7.4  | 200  | 130 | 98  | Yes | 291.7  | 3.7  |
| ZB2-2-71 | 135.00 | 174.10 | 1.29 | 21.42 | 0.5963 | 0.05 | 0.0037 | 294.1  | 7.8  | 220  | 140 | 98  | Yes | 294.2  | 4.0  |
| ZB2-2-72 | 158.20 | 49.20  | 0.31 | 3.05  | 0.0681 | 0.11 | 0.0033 | 1825.0 | 36.0 | 1824 | 52  | 100 | Yes | 1828.3 | 14.8 |
| ZB2-2-73 | 93.90  | 163.50 | 1.74 | 21.37 | 0.5481 | 0.05 | 0.0038 | 294.7  | 7.4  | 210  | 140 | 98  | Yes | 294.9  | 3.7  |
| ZB2-2-74 | 103.70 | 83.60  | 0.81 | 21.72 | 0.5664 | 0.05 | 0.0038 | 290.0  | 7.4  | 100  | 140 | 94  | Yes | 289.9  | 3.7  |
| ZB2-2-75 | 214.30 | 230.40 | 1.08 | 21.75 | 0.4730 | 0.05 | 0.0025 | 289.7  | 6.4  | 155  | 100 | 96  | Yes | 289.5  | 3.1  |
| ZB2-2-76 | 46.67  | 39.34  | 0.84 | 20.96 | 0.6593 | 0.05 | 0.0059 | 300.3  | 9.1  | -20  | 220 | 89  | No  | 300.2  | 4.6  |
| ZB2-2-77 | 96.70  | 72.50  | 0.75 | 22.49 | 0.5565 | 0.05 | 0.0038 | 280.3  | 7.1  | 220  | 140 | 100 | Yes | 280.5  | 3.4  |
| ZB2-2-78 | 74.80  | 93.60  | 1.25 | 21.70 | 0.5651 | 0.06 | 0.0046 | 291.0  | 7.7  | 230  | 160 | 99  | Yes | 290.5  | 3.7  |
| ZB2-2-79 | 206.30 | 233.80 | 1.13 | 22.06 | 0.5351 | 0.05 | 0.0026 | 285.8  | 6.7  | 312  | 100 | 98  | Yes | 286.1  | 3.4  |
| ZB2-2-80 | 147.00 | 161.80 | 1.10 | 22.29 | 0.5963 | 0.05 | 0.003  | 282.8  | 7.3  | 160  | 120 | 96  | Yes | 282.7  | 3.7  |
| ZB2-2-81 | 71.40  | 116.00 | 1.62 | 21.83 | 0.6197 | 0.05 | 0.0046 | 288.4  | 7.9  | 130  | 170 | 96  | Yes | 288.7  | 4.0  |
| ZB2-2-82 | 231.00 | 160.00 | 0.69 | 21.46 | 0.5526 | 0.05 | 0.0027 | 293.5  | 7.6  | 335  | 100 | 97  | Yes | 293.8  | 3.7  |
| ZB2-2-83 | 143.50 | 145.20 | 1.01 | 21.56 | 0.5576 | 0.05 | 0.0032 | 292.2  | 7.6  | 260  | 130 | 100 | Yes | 292.4  | 3.7  |
| ZB2-2-84 | 145.50 | 342.30 | 2.35 | 21.75 | 0.5205 | 0.05 | 0.0032 | 289.7  | 7.0  | 230  | 120 | 100 | Yes | 289.8  | 3.4  |
| ZB2-2-85 | 550.00 | 464.00 | 0.84 | 21.77 | 0.4738 | 0.05 | 0.002  | 289.5  | 6.4  | 333  | 82  | 98  | Yes | 289.8  | 3.1  |
| ZB2-2-86 | 244.90 | 353.00 | 1.44 | 22.13 | 0.5387 | 0.05 | 0.0025 | 284.9  | 6.9  | 272  | 100 | 100 | Yes | 285.0  | 3.4  |
| ZB2-2-87 | 118.10 | 172.30 | 1.46 | 21.69 | 0.5647 | 0.06 | 0.0038 | 290.5  | 7.2  | 320  | 140 | 97  | Yes | 290.7  | 3.7  |
| ZB2-2-88 | 228.60 | 151.60 | 0.66 | 21.74 | 0.6616 | 0.05 | 0.0029 | 289.8  | 8.9  | 340  | 120 | 97  | Yes | 290.2  | 4.3  |
| ZB2-2-89 | 461.00 | 397.80 | 0.86 | 18.93 | 0.4658 | 0.12 | 0.0079 | 331.7  | 8.1  | 1890 | 130 | 37  | No  | 318.4  | 3.9  |
| ZB2-2-90 | 172.00 | 175.10 | 1.02 | 21.51 | 0.9250 | 0.05 | 0.0051 | 293.0  | 12.0 | 320  | 190 | 97  | Yes | 293.2  | 6.2  |
| ZB2-2-91 | 198.50 | 236.40 | 1.19 | 21.38 | 0.5486 | 0.06 | 0.0032 | 294.6  | 7.2  | 400  | 120 | 94  | Yes | 294.8  | 3.7  |
| ZB2-2-92 | 182.60 | 244.10 | 1.34 | 22.34 | 0.5990 | 0.05 | 0.0028 | 282.2  | 7.1  | 214  | 110 | 99  | Yes | 282.3  | 3.7  |
| ZB2-2-93 | 108.50 | 85.90  | 0.79 | 22.33 | 0.5984 | 0.05 | 0.0038 | 282.3  | 7.2  | 240  | 140 | 100 | Yes | 282.5  | 3.7  |
| ZB2-2-94 | 77.00  | 54.40  | 0.71 | 22.37 | 0.6506 | 0.06 | 0.0044 | 281.5  | 8.1  | 270  | 160 | 96  | Yes | 282.0  | 4.0  |
| ZB2-2-95 | 111.50 | 129.10 | 1.16 | 22.37 | 0.6506 | 0.05 | 0.0037 | 282.0  | 7.8  | 290  | 130 | 97  | Yes | 282.1  | 4.0  |
| ZB2-2-96 | 193.30 | 166.10 | 0.86 | 21.79 | 0.5698 | 0.05 | 0.0027 | 289.8  | 7.4  | 190  | 110 | 97  | Yes | 289.0  | 3.7  |

|           |        |         |      |       |        |      |        |        |      |      |     |     |     |        |      |
|-----------|--------|---------|------|-------|--------|------|--------|--------|------|------|-----|-----|-----|--------|------|
| ZB2-2-97  | 144.70 | 274.00  | 1.89 | 22.13 | 0.5876 | 0.05 | 0.0032 | 284.8  | 7.5  | 200  | 120 | 98  | Yes | 284.9  | 3.7  |
| ZB2-2-98  | 84.60  | 32.06   | 0.38 | 21.79 | 0.6645 | 0.05 | 0.0039 | 289.2  | 8.4  | 290  | 150 | 99  | Yes | 289.5  | 4.3  |
| ZB2-2-99  | 459.00 | 1001.00 | 2.18 | 19.59 | 0.4605 | 0.08 | 0.0032 | 320.9  | 7.4  | 1023 | 89  | 71  | No  | 314.9  | 3.7  |
| ZB2-2-100 | 93.90  | 124.50  | 1.33 | 22.61 | 0.6137 | 0.05 | 0.0041 | 278.8  | 7.2  | 250  | 150 | 98  | Yes | 279.1  | 3.7  |
| ZB2-2-101 | 110.60 | 166.30  | 1.50 | 21.69 | 0.6588 | 0.05 | 0.0043 | 290.5  | 8.9  | 290  | 160 | 97  | Yes | 290.7  | 4.3  |
| ZB2-2-102 | 65.70  | 78.60   | 1.20 | 2.06  | 0.0468 | 0.17 | 0.005  | 2545.0 | 49.0 | 2581 | 49  | 99  | Yes | 2566.3 | 17.2 |
| ZB2-2-103 | 31.87  | 21.94   | 0.69 | 22.78 | 0.7783 | 0.05 | 0.0067 | 276.8  | 9.2  | -20  | 240 | 91  | Yes | 276.9  | 4.6  |
| ZB2-2-104 | 200.80 | 147.10  | 0.73 | 21.62 | 0.5608 | 0.05 | 0.0027 | 291.5  | 7.3  | 154  | 110 | 96  | Yes | 291.1  | 3.7  |
| ZB2-2-105 | 56.20  | 28.29   | 0.50 | 21.98 | 0.6279 | 0.05 | 0.0051 | 286.7  | 8.3  | 240  | 180 | 99  | Yes | 286.9  | 4.0  |
| ZB2-2-106 | 98.90  | 67.40   | 0.68 | 22.11 | 0.5866 | 0.05 | 0.004  | 285.1  | 7.6  | 110  | 150 | 94  | Yes | 285.0  | 3.7  |
| ZB2-2-107 | 120.80 | 208.10  | 1.72 | 22.43 | 0.6038 | 0.05 | 0.0036 | 281.1  | 7.2  | 230  | 130 | 100 | Yes | 281.3  | 3.7  |
| ZB2-2-108 | 182.00 | 207.80  | 1.14 | 21.76 | 0.5210 | 0.05 | 0.0029 | 289.5  | 6.9  | 230  | 110 | 99  | Yes | 289.6  | 3.4  |
| ZB2-2-109 | 136.20 | 105.30  | 0.77 | 22.19 | 0.5908 | 0.05 | 0.0036 | 284.1  | 7.6  | 180  | 140 | 97  | Yes | 284.1  | 3.7  |
| ZB2-2-110 | 47.80  | 44.50   | 0.93 | 21.88 | 0.7182 | 0.05 | 0.0053 | 287.7  | 9.4  | 190  | 190 | 100 | Yes | 288.2  | 4.6  |
| ZB3-1-1   | 345.8  | 158.6   | 0.46 | 20.39 | 0.2702 | 0.05 | 0.0019 | 308.6  | 4    | 260  | 78  | 99  | YES | 308.6  | 2.0  |
| ZB3-1-2   | 311.9  | 463     | 1.48 | 21.96 | 0.3086 | 0.05 | 0.0022 | 287    | 3.9  | 224  | 88  | 99  | YES | 287.1  | 2.0  |
| ZB3-1-3   | 50.5   | 31.02   | 0.61 | 2.14  | 0.0283 | 0.17 | 0.0034 | 2473   | 27   | 2516 | 35  | 99  | YES | 2494.1 | 10.8 |
| ZB3-1-4   | 370.6  | 82      | 0.22 | 3.04  | 0.0333 | 0.11 | 0.0017 | 1831   | 17   | 1835 | 28  | 100 | YES | 1834.3 | 7.4  |
| ZB3-1-5   | 848    | 321     | 0.38 | 20.42 | 0.2418 | 0.05 | 0.0014 | 308.2  | 3.6  | 243  | 59  | 98  | YES | 308.1  | 1.8  |
| ZB3-1-6   | 430.7  | 187.6   | 0.44 | 20.14 | 0.2838 | 0.05 | 0.0022 | 312.3  | 4.3  | 267  | 89  | 100 | YES | 312.4  | 2.2  |
| ZB3-1-7   | 637    | 458.7   | 0.72 | 19.96 | 0.2350 | 0.05 | 0.0017 | 315.1  | 3.6  | 320  | 68  | 99  | YES | 315.3  | 1.8  |
| ZB3-1-8   | 248    | 91.9    | 0.37 | 3.07  | 0.0340 | 0.11 | 0.002  | 1816   | 17   | 1826 | 33  | 100 | YES | 1819.5 | 7.7  |
| ZB3-1-9   | 129.1  | 61.1    | 0.47 | 20.25 | 0.3771 | 0.05 | 0.0037 | 310.7  | 5.7  | 110  | 140 | 95  | YES | 310.6  | 2.8  |
| ZB3-1-10  | 543.9  | 194.2   | 0.36 | 20.29 | 0.2512 | 0.05 | 0.0021 | 310    | 3.8  | 291  | 86  | 99  | YES | 310.2  | 1.9  |
| ZB3-1-11  | 546    | 310     | 0.57 | 21.90 | 0.3214 | 0.05 | 0.0021 | 287.8  | 4.1  | 261  | 84  | 99  | YES | 287.9  | 2.1  |
| ZB3-1-12  | 410.2  | 334.1   | 0.81 | 20.75 | 0.3142 | 0.05 | 0.002  | 303.4  | 4.5  | 278  | 81  | 99  | YES | 303.5  | 2.2  |
| ZB3-1-13  | 578    | 157.4   | 0.27 | 2.97  | 0.0378 | 0.11 | 0.0018 | 1872   | 21   | 1865 | 28  | 100 | YES | 1872.5 | 8.4  |
| ZB3-1-14  | 790    | 386     | 0.49 | 2.97  | 0.0352 | 0.11 | 0.0017 | 1870   | 19   | 1849 | 27  | 100 | YES | 1864.0 | 7.8  |
| ZB3-1-15  | 271.7  | 125.5   | 0.46 | 3.01  | 0.0353 | 0.11 | 0.002  | 1849   | 19   | 1827 | 33  | 100 | YES | 1846.4 | 8.1  |
| ZB3-1-16  | 1549   | 77.1    | 0.05 | 2.95  | 0.0357 | 0.11 | 0.0015 | 1881   | 20   | 1856 | 24  | 100 | YES | 1872.6 | 7.5  |



|          |       |       |      |       |        |      |        |       |     |      |     |     |     |        |      |
|----------|-------|-------|------|-------|--------|------|--------|-------|-----|------|-----|-----|-----|--------|------|
| ZB3-1-17 | 779   | 264.6 | 0.34 | 20.55 | 0.2789 | 0.05 | 0.0016 | 306.2 | 4.1 | 282  | 65  | 100 | YES | 306.3  | 2.0  |
| ZB3-1-18 | 1394  | 108   | 0.08 | 2.96  | 0.0368 | 0.11 | 0.0016 | 1874  | 20  | 1870 | 25  | 100 | YES | 1875.1 | 7.9  |
| ZB3-1-19 | 754   | 376.3 | 0.50 | 2.97  | 0.0363 | 0.11 | 0.0017 | 1867  | 20  | 1840 | 27  | 100 | YES | 1859.9 | 7.9  |
| ZB3-1-20 | 231.2 | 115.4 | 0.50 | 20.55 | 0.3507 | 0.05 | 0.0031 | 306.2 | 5.1 | 200  | 120 | 98  | YES | 306.2  | 2.6  |
| ZB3-1-21 | 392.6 | 298.6 | 0.76 | 20.26 | 0.3080 | 0.05 | 0.002  | 310.5 | 4.6 | 215  | 83  | 98  | YES | 310.3  | 2.3  |
| ZB3-1-22 | 280   | 98.5  | 0.35 | 2.07  | 0.0256 | 0.17 | 0.0027 | 2542  | 26  | 2532 | 26  | 100 | YES | 2541.5 | 9.3  |
| ZB3-1-23 | 272.1 | 218.7 | 0.80 | 2.08  | 0.0278 | 0.17 | 0.0026 | 2526  | 28  | 2521 | 26  | 100 | YES | 2527.0 | 9.5  |
| ZB3-1-24 | 231.6 | 139.5 | 0.60 | 16.75 | 0.2497 | 0.05 | 0.0026 | 373.7 | 5.4 | 280  | 100 | 99  | YES | 373.8  | 2.7  |
| ZB3-1-25 | 429   | 97.3  | 0.23 | 2.90  | 0.0329 | 0.11 | 0.0018 | 1907  | 19  | 1855 | 29  | 99  | YES | 1893.6 | 7.7  |
| ZB3-1-26 | 852   | 89.4  | 0.10 | 2.87  | 0.0313 | 0.12 | 0.0016 | 1928  | 18  | 1899 | 24  | 99  | YES | 1918.6 | 7.2  |
| ZB3-1-27 | 153.3 | 210.7 | 1.37 | 20.00 | 0.3440 | 0.05 | 0.0031 | 314.4 | 5.3 | 240  | 120 | 100 | YES | 314.5  | 2.6  |
| ZB3-1-28 | 312   | 268   | 0.86 | 21.32 | 0.3363 | 0.05 | 0.0024 | 295.4 | 4.5 | 176  | 98  | 97  | YES | 295.4  | 2.3  |
| ZB3-1-29 | 439.9 | 262.5 | 0.60 | 21.61 | 0.3175 | 0.05 | 0.002  | 291.6 | 4.2 | 292  | 80  | 98  | YES | 291.7  | 2.1  |
| ZB3-1-30 | 94.4  | 55.4  | 0.59 | 2.12  | 0.0288 | 0.16 | 0.0031 | 2494  | 30  | 2498 | 33  | 100 | YES | 2494.4 | 10.6 |
| ZB3-1-31 | 105.6 | 133.3 | 1.26 | 19.61 | 0.3845 | 0.06 | 0.0044 | 320.6 | 6.2 | 280  | 160 | 98  | YES | 320.7  | 3.1  |
| ZB3-1-32 | 423   | 128.8 | 0.30 | 2.96  | 0.0350 | 0.11 | 0.0018 | 1876  | 19  | 1864 | 30  | 100 | YES | 1874.2 | 8.0  |
| ZB3-1-33 | 415   | 260.6 | 0.63 | 2.04  | 0.0233 | 0.17 | 0.0024 | 2570  | 24  | 2528 | 24  | 99  | YES | 2551.5 | 8.4  |
| ZB3-1-34 | 308   | 326   | 1.06 | 2.97  | 0.0380 | 0.11 | 0.0019 | 1868  | 21  | 1870 | 30  | 100 | YES | 1871.7 | 8.5  |
| ZB3-1-35 | 144.3 | 130.9 | 0.91 | 2.01  | 0.0271 | 0.17 | 0.0029 | 2599  | 29  | 2503 | 30  | 98  | YES | 2555.3 | 10.0 |
| ZB3-1-36 | 282   | 275   | 0.98 | 20.08 | 0.2781 | 0.05 | 0.0024 | 313.3 | 4.2 | 300  | 90  | 98  | YES | 313.4  | 2.1  |
| ZB3-1-37 | 191.1 | 142.8 | 0.75 | 20.66 | 0.3415 | 0.05 | 0.003  | 304.6 | 4.9 | 270  | 110 | 98  | YES | 304.8  | 2.5  |
| ZB3-1-38 | 270   | 110.1 | 0.41 | 19.47 | 0.3186 | 0.05 | 0.0021 | 322.8 | 5.2 | 263  | 86  | 99  | YES | 322.8  | 2.6  |
| ZB3-1-39 | 188   | 101.4 | 0.54 | 2.96  | 0.0402 | 0.11 | 0.0021 | 1882  | 23  | 1859 | 33  | 100 | YES | 1875.1 | 9.2  |
| ZB3-1-40 | 348.3 | 77.1  | 0.22 | 2.87  | 0.0395 | 0.11 | 0.0017 | 1928  | 23  | 1856 | 27  | 99  | YES | 1898.8 | 8.5  |
| ZB3-1-41 | 175.1 | 93.2  | 0.53 | 3.02  | 0.0430 | 0.11 | 0.0019 | 1841  | 23  | 1818 | 32  | 100 | YES | 1836.6 | 9.1  |
| ZB3-1-42 | 364.4 | 54.2  | 0.15 | 2.91  | 0.0408 | 0.12 | 0.0018 | 1900  | 23  | 1896 | 28  | 100 | YES | 1901.3 | 8.9  |
| ZB3-1-43 | 233.6 | 160.7 | 0.69 | 2.04  | 0.0309 | 0.17 | 0.0028 | 2566  | 32  | 2535 | 28  | 100 | YES | 2553.8 | 10.4 |
| ZB3-1-44 | 317   | 144.1 | 0.45 | 2.77  | 0.0390 | 0.12 | 0.0021 | 1988  | 24  | 2008 | 30  | 99  | YES | 1999.7 | 9.5  |
| ZB3-1-45 | 200.3 | 239.2 | 1.19 | 20.04 | 0.5221 | 0.05 | 0.0037 | 313.7 | 8   | 290  | 150 | 99  | YES | 314.0  | 4.0  |
| ZB3-1-46 | 120   | 69.1  | 0.58 | 2.01  | 0.0307 | 0.17 | 0.003  | 2599  | 33  | 2530 | 30  | 99  | YES | 2565.4 | 10.8 |

|          |       |       |      |       |        |      |        |       |     |      |     |     |     |        |      |
|----------|-------|-------|------|-------|--------|------|--------|-------|-----|------|-----|-----|-----|--------|------|
| ZB3-1-47 | 132.9 | 81.6  | 0.61 | 2.04  | 0.0276 | 0.17 | 0.0028 | 2565  | 29  | 2502 | 28  | 99  | YES | 2537.6 | 9.9  |
| ZB3-1-48 | 352.1 | 201.9 | 0.57 | 3.37  | 0.0532 | 0.12 | 0.0034 | 1678  | 23  | 1997 | 47  | 92  | YES | 1717.9 | 11.6 |
| ZB3-1-49 | 276.2 | 334   | 1.21 | 20.79 | 0.3198 | 0.05 | 0.002  | 303.3 | 4.5 | 257  | 81  | 100 | YES | 302.8  | 2.3  |
| ZB3-1-50 | 336.2 | 410   | 1.22 | 20.30 | 0.2884 | 0.05 | 0.002  | 310   | 4.3 | 267  | 79  | 100 | YES | 310.0  | 2.2  |
| ZB3-1-51 | 104.1 | 68.7  | 0.66 | 2.08  | 0.0321 | 0.17 | 0.0028 | 2523  | 32  | 2515 | 29  | 100 | YES | 2522.2 | 10.6 |
| ZB3-1-52 | 112.8 | 59.4  | 0.53 | 2.15  | 0.0342 | 0.14 | 0.0029 | 2461  | 33  | 2255 | 35  | 96  | YES | 2367.1 | 11.2 |
| ZB3-1-53 | 100   | 80.6  | 0.81 | 16.56 | 0.3015 | 0.05 | 0.0034 | 378   | 6.9 | 290  | 120 | 99  | YES | 378.1  | 3.3  |
| ZB3-1-54 | 144   | 119.1 | 0.83 | 16.56 | 0.3015 | 0.06 | 0.0027 | 377.7 | 6.9 | 370  | 100 | 98  | YES | 378.3  | 3.3  |
| ZB3-1-55 | 359.1 | 71.6  | 0.20 | 2.93  | 0.0421 | 0.11 | 0.0019 | 1890  | 23  | 1850 | 31  | 99  | YES | 1878.0 | 9.2  |
| ZB3-1-56 | 310   | 594   | 1.92 | 23.43 | 0.3623 | 0.06 | 0.0022 | 269.4 | 4.1 | 497  | 79  | 89  | NO  | 269.3  | 2.0  |
| ZB3-1-57 | 517   | 92.6  | 0.18 | 2.82  | 0.0397 | 0.11 | 0.002  | 1956  | 24  | 1857 | 31  | 98  | YES | 1921.6 | 9.2  |
| ZB3-1-58 | 520.3 | 169.1 | 0.33 | 2.92  | 0.0401 | 0.11 | 0.0019 | 1896  | 22  | 1848 | 31  | 99  | YES | 1881.2 | 8.9  |
| ZB3-1-59 | 382   | 328   | 0.86 | 2.95  | 0.0392 | 0.11 | 0.0019 | 1880  | 22  | 1862 | 30  | 100 | YES | 1876.8 | 8.7  |
| ZB3-1-60 | 218.3 | 144.5 | 0.66 | 20.51 | 0.3324 | 0.05 | 0.0024 | 306.8 | 4.8 | 275  | 97  | 99  | YES | 306.9  | 2.4  |
| ZB3-1-61 | 193   | 65    | 0.34 | 2.93  | 0.0480 | 0.12 | 0.0022 | 1893  | 27  | 1879 | 35  | 100 | YES | 1893.0 | 10.6 |
| ZB3-1-62 | 243.5 | 134.4 | 0.55 | 2.86  | 0.0465 | 0.11 | 0.0022 | 1933  | 27  | 1848 | 35  | 98  | YES | 1906.2 | 10.4 |
| ZB3-1-63 | 516   | 48.79 | 0.09 | 2.93  | 0.0454 | 0.12 | 0.0019 | 1893  | 25  | 1878 | 28  | 100 | YES | 1889.1 | 9.6  |
| ZB3-1-64 | 68.1  | 229.1 | 3.36 | 2.07  | 0.0324 | 0.16 | 0.003  | 2541  | 33  | 2491 | 31  | 99  | YES | 2517.7 | 11.1 |
| ZB3-1-65 | 258   | 307   | 1.19 | 20.66 | 0.3627 | 0.05 | 0.0021 | 304.6 | 5.2 | 226  | 87  | 99  | YES | 304.6  | 2.6  |
| ZB3-1-66 | 308   | 289   | 0.94 | 2.40  | 0.0456 | 0.16 | 0.003  | 2246  | 37  | 2484 | 31  | 94  | YES | 2382.2 | 12.7 |
| ZB3-1-67 | 142.9 | 72.7  | 0.51 | 2.04  | 0.0336 | 0.17 | 0.0032 | 2576  | 36  | 2594 | 31  | 99  | YES | 2591.1 | 11.6 |
| ZB3-1-68 | 73.6  | 42.3  | 0.57 | 2.05  | 0.0315 | 0.17 | 0.0032 | 2557  | 32  | 2521 | 33  | 100 | YES | 2543.9 | 11.3 |
| ZB3-1-69 | 99.5  | 95.8  | 0.96 | 21.57 | 0.4096 | 0.05 | 0.0033 | 292   | 5.4 | 220  | 120 | 99  | YES | 292.1  | 2.7  |
| ZB3-1-70 | 132.5 | 66.1  | 0.50 | 3.00  | 0.0441 | 0.11 | 0.0025 | 1853  | 24  | 1859 | 40  | 99  | YES | 1859.1 | 10.2 |
| ZB3-1-71 | 202.4 | 155.4 | 0.77 | 2.99  | 0.0465 | 0.11 | 0.002  | 1857  | 25  | 1856 | 33  | 100 | YES | 1860.2 | 9.9  |
| ZB3-1-72 | 174.1 | 155.3 | 0.89 | 1.99  | 0.0317 | 0.17 | 0.003  | 2619  | 34  | 2585 | 29  | 100 | YES | 2605.0 | 11.0 |
| ZB3-1-73 | 265   | 60.7  | 0.23 | 2.97  | 0.0441 | 0.11 | 0.0021 | 1870  | 24  | 1840 | 34  | 100 | YES | 1864.5 | 9.7  |
| ZB3-1-74 | 187.2 | 171   | 0.91 | 20.58 | 0.3814 | 0.05 | 0.0025 | 305.7 | 5.5 | 200  | 100 | 98  | YES | 305.7  | 2.8  |
| ZB3-1-75 | 528.2 | 65.9  | 0.12 | 3.04  | 0.0426 | 0.11 | 0.0019 | 1831  | 22  | 1847 | 30  | 99  | YES | 1839.6 | 9.1  |
| ZB3-1-76 | 275.6 | 267.5 | 0.97 | 20.04 | 0.3775 | 0.05 | 0.0021 | 313.8 | 5.7 | 299  | 86  | 99  | YES | 314.0  | 2.9  |

|           |       |       |      |       |        |      |        |       |     |      |     |     |     |        |      |
|-----------|-------|-------|------|-------|--------|------|--------|-------|-----|------|-----|-----|-----|--------|------|
| ZB3-1-77  | 527   | 204.1 | 0.39 | 2.95  | 0.0444 | 0.12 | 0.002  | 1880  | 25  | 1891 | 31  | 99  | YES | 1887.7 | 9.7  |
| ZB3-1-78  | 262.6 | 230.5 | 0.88 | 16.82 | 0.2546 | 0.06 | 0.0021 | 372.3 | 5.5 | 390  | 79  | 98  | YES | 372.6  | 2.7  |
| ZB3-1-79  | 350.9 | 416   | 1.19 | 16.56 | 0.3015 | 0.06 | 0.002  | 378.2 | 6.6 | 389  | 76  | 98  | YES | 378.4  | 3.3  |
| ZB3-1-80  | 279.3 | 53.93 | 0.19 | 2.96  | 0.0474 | 0.12 | 0.0022 | 1872  | 26  | 1883 | 34  | 99  | YES | 1881.1 | 10.4 |
| ZB3-1-81  | 215.8 | 186.6 | 0.86 | 2.13  | 0.0341 | 0.17 | 0.0029 | 2476  | 33  | 2521 | 29  | 99  | YES | 2506.6 | 11.1 |
| ZB3-1-82  | 250.5 | 266.8 | 1.07 | 20.10 | 0.3516 | 0.05 | 0.0023 | 312.8 | 5.3 | 223  | 93  | 99  | YES | 312.8  | 2.7  |
| ZB3-1-83  | 211   | 96.1  | 0.46 | 2.99  | 0.0501 | 0.11 | 0.0022 | 1857  | 27  | 1853 | 34  | 100 | YES | 1859.6 | 10.7 |
| ZB3-1-84  | 207.4 | 185.1 | 0.89 | 2.05  | 0.0324 | 0.17 | 0.0031 | 2556  | 33  | 2526 | 31  | 99  | YES | 2544.7 | 11.3 |
| ZB3-1-85  | 247.3 | 184.5 | 0.75 | 3.00  | 0.0459 | 0.11 | 0.0021 | 1855  | 25  | 1839 | 34  | 100 | YES | 1852.2 | 9.9  |
| ZB3-1-86  | 266.2 | 162.4 | 0.61 | 17.39 | 0.3327 | 0.07 | 0.0026 | 360.1 | 6.7 | 984  | 76  | 74  | NO  | 356.2  | 3.4  |
| ZB3-1-87  | 816   | 131   | 0.16 | 2.99  | 0.0511 | 0.12 | 0.0019 | 1856  | 27  | 1893 | 29  | 99  | YES | 1875.8 | 10.2 |
| ZB3-1-88  | 485   | 144.2 | 0.30 | 2.95  | 0.0521 | 0.11 | 0.0019 | 1884  | 28  | 1825 | 30  | 99  | YES | 1859.2 | 10.3 |
| ZB3-1-89  | 616   | 68.3  | 0.11 | 3.03  | 0.0550 | 0.11 | 0.0019 | 1838  | 29  | 1850 | 31  | 99  | YES | 1849.1 | 10.5 |
| ZB3-1-90  | 109.1 | 89.9  | 0.82 | 2.01  | 0.0368 | 0.18 | 0.0036 | 2603  | 40  | 2601 | 34  | 100 | YES | 2608.6 | 12.9 |
| ZB3-1-91  | 370.3 | 598   | 1.61 | 20.79 | 0.3845 | 0.05 | 0.0021 | 302.8 | 5.5 | 319  | 83  | 98  | YES | 303.1  | 2.7  |
| ZB3-1-92  | 391   | 324   | 0.83 | 20.35 | 0.3684 | 0.05 | 0.0021 | 309.2 | 5.4 | 318  | 80  | 98  | YES | 309.5  | 2.7  |
| ZB3-1-93  | 549   | 140.3 | 0.26 | 2.13  | 0.0382 | 0.17 | 0.003  | 2475  | 37  | 2522 | 29  | 99  | YES | 2507.6 | 11.8 |
| ZB3-1-94  | 301.9 | 218.5 | 0.72 | 21.75 | 0.4070 | 0.05 | 0.0022 | 289.6 | 5.3 | 278  | 88  | 98  | YES | 289.8  | 2.7  |
| ZB3-1-95  | 584   | 53.6  | 0.09 | 2.91  | 0.0433 | 0.12 | 0.0022 | 1903  | 25  | 1867 | 34  | 99  | YES | 1893.9 | 9.9  |
| ZB3-1-96  | 119.6 | 190.2 | 1.59 | 3.00  | 0.0530 | 0.11 | 0.0025 | 1854  | 29  | 1809 | 42  | 100 | YES | 1845.0 | 11.5 |
| ZB3-1-97  | 414.5 | 446   | 1.08 | 16.95 | 0.2873 | 0.06 | 0.0018 | 369.2 | 6.3 | 418  | 69  | 97  | YES | 370.0  | 3.0  |
| ZB3-1-98  | 346   | 146   | 0.42 | 3.01  | 0.0516 | 0.12 | 0.0022 | 1848  | 28  | 1883 | 35  | 99  | YES | 1867.7 | 10.9 |
| ZB3-1-99  | 188.7 | 198.5 | 1.05 | 2.01  | 0.0369 | 0.16 | 0.0027 | 2594  | 39  | 2497 | 27  | 98  | YES | 2535.2 | 11.1 |
| ZB3-1-100 | 162.5 | 179.4 | 1.10 | 16.26 | 0.2908 | 0.05 | 0.0027 | 384.6 | 6.8 | 260  | 100 | 97  | YES | 384.6  | 3.3  |
| ZB3-1-101 | 33.61 | 20.68 | 0.62 | 2.09  | 0.0416 | 0.17 | 0.0045 | 2513  | 41  | 2507 | 47  | 100 | YES | 2524.3 | 15.3 |
| ZB3-1-102 | 280.1 | 94.4  | 0.34 | 2.10  | 0.0357 | 0.18 | 0.0038 | 2508  | 35  | 2643 | 35  | 97  | YES | 2582.4 | 13.1 |
| ZB3-1-103 | 586.9 | 15.95 | 0.03 | 2.94  | 0.0457 | 0.11 | 0.0019 | 1887  | 26  | 1873 | 29  | 100 | YES | 1883.9 | 9.6  |
| ZB3-1-104 | 418.4 | 106.4 | 0.25 | 2.91  | 0.0415 | 0.11 | 0.0018 | 1902  | 24  | 1843 | 28  | 99  | YES | 1881.3 | 8.9  |
| ZB3-1-105 | 390.6 | 202.4 | 0.52 | 16.75 | 0.2806 | 0.05 | 0.0017 | 374.2 | 6.5 | 320  | 67  | 99  | YES | 373.7  | 3.0  |
| ZB3-1-106 | 188.7 | 140.7 | 0.75 | 3.02  | 0.0483 | 0.11 | 0.0022 | 1842  | 25  | 1848 | 35  | 99  | YES | 1849.4 | 10.4 |

|           |       |       |      |       |        |      |        |       |     |      |     |     |     |        |      |
|-----------|-------|-------|------|-------|--------|------|--------|-------|-----|------|-----|-----|-----|--------|------|
| ZB3-1-107 | 531   | 159.1 | 0.30 | 16.86 | 0.2844 | 0.05 | 0.0015 | 371   | 6.1 | 323  | 62  | 100 | YES | 371.2  | 3.0  |
| ZB3-1-108 | 208.1 | 61.3  | 0.29 | 2.72  | 0.0414 | 0.12 | 0.0022 | 2016  | 27  | 1967 | 32  | 99  | YES | 2000.4 | 10.1 |
| ZB3-1-109 | 214.8 | 258.2 | 1.20 | 2.45  | 0.0481 | 0.18 | 0.0037 | 2202  | 37  | 2655 | 35  | 89  | NO  | 2429.8 | 15.1 |
| ZB3-1-110 | 545   | 44.8  | 0.08 | 2.94  | 0.0519 | 0.11 | 0.0019 | 1884  | 29  | 1867 | 30  | 100 | YES | 1880.5 | 10.3 |
| ZB3-3-1   | 93.2  | 137.4 | 1.47 | 21.68 | 0.4041 | 0.05 | 0.0036 | 290.6 | 5.3 | 280  | 130 | 98  | YES | 290.8  | 2.7  |
| ZB3-3-2   | 226.3 | 246   | 1.09 | 20.89 | 0.2750 | 0.05 | 0.0024 | 301.3 | 3.9 | 294  | 92  | 98  | YES | 301.4  | 1.9  |
| ZB3-3-3   | 1062  | 704   | 0.66 | 37.47 | 0.4633 | 0.05 | 0.0015 | 169.8 | 2   | 249  | 61  | 96  | YES | 169.8  | 1.0  |
| ZB3-3-4   | 131.7 | 220   | 1.67 | 21.39 | 0.3616 | 0.06 | 0.0034 | 294.4 | 4.9 | 310  | 130 | 96  | YES | 294.6  | 2.4  |
| ZB3-3-5   | 332   | 112.1 | 0.34 | 2.86  | 0.0351 | 0.11 | 0.0018 | 1934  | 20  | 1868 | 28  | 99  | YES | 1913.6 | 8.1  |
| ZB3-3-6   | 326.9 | 146.9 | 0.45 | 21.97 | 0.2799 | 0.05 | 0.0022 | 286.9 | 3.6 | 309  | 89  | 97  | YES | 287.0  | 1.8  |
| ZB3-3-7   | 355   | 103.5 | 0.29 | 2.95  | 0.0374 | 0.11 | 0.0018 | 1880  | 21  | 1859 | 28  | 100 | YES | 1875.6 | 8.3  |
| ZB3-3-8   | 124.9 | 80.9  | 0.65 | 22.21 | 0.4044 | 0.05 | 0.003  | 283.9 | 5.1 | 200  | 120 | 99  | YES | 283.9  | 2.5  |
| ZB3-3-9   | 98.2  | 73.3  | 0.75 | 22.35 | 0.4147 | 0.05 | 0.0042 | 282.1 | 5.1 | 220  | 150 | 99  | YES | 282.2  | 2.6  |
| ZB3-3-10  | 261.3 | 429   | 1.64 | 20.93 | 0.2936 | 0.05 | 0.0023 | 300.7 | 4.1 | 247  | 94  | 100 | YES | 300.8  | 2.1  |
| ZB3-3-11  | 236   | 72.8  | 0.31 | 3.02  | 0.0346 | 0.12 | 0.0019 | 1845  | 18  | 1877 | 30  | 99  | YES | 1855.5 | 7.9  |
| ZB3-3-12  | 190.3 | 213   | 1.12 | 21.73 | 0.3589 | 0.05 | 0.0024 | 290   | 4.7 | 185  | 100 | 97  | YES | 289.9  | 2.3  |
| ZB3-3-13  | 358   | 640   | 1.79 | 21.96 | 0.3038 | 0.05 | 0.0019 | 287.1 | 3.9 | 243  | 78  | 100 | YES | 287.1  | 1.9  |
| ZB3-3-14  | 373.1 | 735   | 1.97 | 22.16 | 0.3093 | 0.05 | 0.0019 | 284.5 | 3.9 | 278  | 82  | 98  | YES | 284.6  | 1.9  |
| ZB3-3-15  | 107.6 | 98    | 0.91 | 21.75 | 0.4117 | 0.05 | 0.0032 | 289.7 | 5.4 | 200  | 130 | 99  | YES | 289.7  | 2.7  |
| ZB3-3-16  | 188.5 | 247   | 1.31 | 21.93 | 0.3557 | 0.05 | 0.0024 | 287.4 | 4.6 | 199  | 96  | 98  | YES | 287.5  | 2.3  |
| ZB3-3-17  | 165.3 | 115.2 | 0.70 | 21.46 | 0.3454 | 0.06 | 0.0028 | 293.5 | 4.6 | 390  | 110 | 94  | YES | 293.7  | 2.3  |
| ZB3-3-18  | 470   | 229.7 | 0.49 | 21.43 | 0.3031 | 0.05 | 0.0017 | 294   | 4   | 277  | 69  | 99  | YES | 294.0  | 2.0  |
| ZB3-3-19  | 161.5 | 121.2 | 0.75 | 21.89 | 0.3450 | 0.05 | 0.0026 | 287.9 | 4.5 | 280  | 100 | 98  | YES | 288.0  | 2.2  |
| ZB3-3-20  | 58.69 | 52.56 | 0.90 | 22.26 | 0.4706 | 0.05 | 0.0047 | 283.2 | 5.9 | 240  | 170 | 97  | YES | 283.4  | 2.9  |
| ZB3-3-21  | 168.8 | 91.7  | 0.54 | 2.91  | 0.0331 | 0.11 | 0.0021 | 1903  | 18  | 1846 | 33  | 99  | YES | 1889.8 | 8.0  |
| ZB3-3-22  | 145.5 | 101.4 | 0.70 | 21.95 | 0.3856 | 0.05 | 0.003  | 287.1 | 4.9 | 140  | 120 | 96  | YES | 287.0  | 2.5  |
| ZB3-3-23  | 119.5 | 65.2  | 0.55 | 21.82 | 0.4001 | 0.05 | 0.0031 | 288.8 | 5.2 | 140  | 120 | 97  | YES | 288.7  | 2.6  |
| ZB3-3-24  | 180.8 | 241.1 | 1.33 | 21.68 | 0.3665 | 0.06 | 0.0028 | 290.7 | 4.8 | 380  | 110 | 94  | YES | 290.8  | 2.4  |
| ZB3-3-25  | 347   | 407   | 1.17 | 2.93  | 0.0379 | 0.11 | 0.0018 | 1892  | 20  | 1851 | 28  | 99  | YES | 1878.8 | 8.4  |
| ZB3-3-26  | 140.7 | 143.6 | 1.02 | 22.34 | 0.3542 | 0.05 | 0.0029 | 282.3 | 4.4 | 210  | 110 | 100 | YES | 282.3  | 2.2  |

|          |       |       |      |       |        |      |        |       |     |      |     |     |     |        |      |
|----------|-------|-------|------|-------|--------|------|--------|-------|-----|------|-----|-----|-----|--------|------|
| ZB3-3-27 | 109.9 | 115   | 1.05 | 21.68 | 0.3808 | 0.05 | 0.0031 | 290.6 | 5   | 180  | 120 | 98  | YES | 290.6  | 2.5  |
| ZB3-3-28 | 390   | 480   | 1.23 | 21.80 | 0.3327 | 0.05 | 0.0019 | 289.1 | 4.3 | 214  | 77  | 99  | YES | 289.0  | 2.2  |
| ZB3-3-29 | 69    | 81.7  | 1.18 | 21.41 | 0.4585 | 0.05 | 0.0045 | 294   | 6.4 | 230  | 160 | 99  | YES | 294.3  | 3.1  |
| ZB3-3-30 | 278.5 | 176.9 | 0.64 | 2.08  | 0.0260 | 0.17 | 0.0024 | 2526  | 26  | 2516 | 25  | 100 | YES | 2524.1 | 8.9  |
| ZB3-3-31 | 50.1  | 37.7  | 0.75 | 21.60 | 0.5598 | 0.06 | 0.0053 | 291.5 | 7.4 | 260  | 190 | 96  | YES | 291.8  | 3.7  |
| ZB3-3-32 | 355   | 268.5 | 0.76 | 21.82 | 0.3141 | 0.05 | 0.0018 | 289.4 | 3.9 | 253  | 74  | 100 | YES | 288.9  | 2.0  |
| ZB3-3-33 | 325.2 | 677   | 2.08 | 22.49 | 0.3086 | 0.05 | 0.002  | 280.4 | 3.8 | 269  | 84  | 98  | YES | 280.5  | 1.9  |
| ZB3-3-34 | 60.25 | 46.5  | 0.77 | 21.93 | 0.4809 | 0.05 | 0.0046 | 287.5 | 6.1 | 200  | 170 | 99  | YES | 287.5  | 3.1  |
| ZB3-3-35 | 437   | 193.6 | 0.44 | 21.73 | 0.2740 | 0.05 | 0.0017 | 289.9 | 3.5 | 267  | 71  | 99  | YES | 290.0  | 1.8  |
| ZB3-3-36 | 236   | 442   | 1.87 | 21.69 | 0.3386 | 0.05 | 0.0022 | 290.5 | 4.5 | 264  | 89  | 99  | YES | 290.7  | 2.2  |
| ZB3-3-37 | 379   | 341   | 0.90 | 19.62 | 0.2811 | 0.05 | 0.0017 | 320.3 | 4.5 | 379  | 71  | 96  | YES | 320.6  | 2.2  |
| ZB3-3-38 | 271.6 | 64.6  | 0.24 | 2.90  | 0.0336 | 0.11 | 0.002  | 1910  | 19  | 1850 | 33  | 99  | YES | 1896.1 | 8.1  |
| ZB3-3-39 | 149.7 | 83.8  | 0.56 | 21.50 | 0.3697 | 0.05 | 0.0032 | 293   | 4.9 | 220  | 120 | 98  | YES | 293.2  | 2.5  |
| ZB3-3-40 | 161.4 | 126.4 | 0.78 | 21.65 | 0.3750 | 0.05 | 0.003  | 291   | 5   | 250  | 120 | 99  | YES | 291.2  | 2.5  |
| ZB3-3-41 | 265.4 | 252   | 0.95 | 20.03 | 0.3089 | 0.05 | 0.0019 | 314   | 4.7 | 273  | 77  | 100 | YES | 314.1  | 2.4  |
| ZB3-3-42 | 241.8 | 221.8 | 0.92 | 21.81 | 0.3566 | 0.05 | 0.0023 | 289   | 4.6 | 239  | 93  | 99  | YES | 289.1  | 2.3  |
| ZB3-3-43 | 211.8 | 132.8 | 0.63 | 21.91 | 0.3313 | 0.05 | 0.0023 | 287.7 | 4.3 | 208  | 94  | 99  | YES | 287.6  | 2.1  |
| ZB3-3-44 | 151.2 | 157.9 | 1.04 | 20.13 | 0.3405 | 0.05 | 0.0029 | 313.1 | 5.3 | 160  | 110 | 96  | YES | 312.4  | 2.6  |
| ZB3-3-45 | 196.2 | 376.5 | 1.92 | 21.72 | 0.3820 | 0.05 | 0.0024 | 290.2 | 5   | 136  | 100 | 96  | YES | 289.9  | 2.5  |
| ZB3-3-46 | 128   | 319   | 2.49 | 19.09 | 0.3499 | 0.11 | 0.0054 | 329   | 5.9 | 1730 | 96  | 42  | NO  | 318.3  | 2.9  |
| ZB3-3-47 | 222.9 | 186.2 | 0.84 | 2.39  | 0.0365 | 0.14 | 0.0024 | 2252  | 29  | 2157 | 31  | 98  | YES | 2211.9 | 10.3 |
| ZB3-3-48 | 101.9 | 82.8  | 0.81 | 20.90 | 0.3889 | 0.06 | 0.0037 | 301.1 | 5.5 | 340  | 130 | 95  | YES | 301.3  | 2.7  |
| ZB3-3-49 | 572.7 | 44.68 | 0.08 | 2.94  | 0.0466 | 0.11 | 0.002  | 1887  | 26  | 1830 | 31  | 99  | YES | 1869.1 | 9.9  |
| ZB3-3-50 | 284.6 | 181.5 | 0.64 | 21.54 | 0.3620 | 0.05 | 0.0022 | 292.4 | 4.8 | 257  | 87  | 99  | YES | 292.5  | 2.4  |
| ZB3-3-51 | 680   | 23.78 | 0.03 | 2.90  | 0.0496 | 0.12 | 0.002  | 1911  | 27  | 1880 | 31  | 99  | YES | 1898.9 | 10.4 |
| ZB3-3-52 | 150.2 | 70.3  | 0.47 | 2.99  | 0.0481 | 0.12 | 0.0026 | 1860  | 26  | 1923 | 40  | 98  | YES | 1884.7 | 11.2 |
| ZB3-3-53 | 258.9 | 57.87 | 0.22 | 2.88  | 0.0447 | 0.11 | 0.0019 | 1925  | 26  | 1854 | 30  | 99  | YES | 1896.9 | 9.6  |
| ZB3-3-54 | 156.2 | 124   | 0.79 | 21.79 | 0.4462 | 0.05 | 0.0027 | 289.2 | 5.8 | 170  | 110 | 97  | YES | 289.1  | 2.9  |
| ZB3-3-55 | 100.4 | 126   | 1.25 | 21.99 | 0.4498 | 0.06 | 0.0037 | 286.6 | 5.7 | 350  | 130 | 93  | YES | 286.7  | 2.9  |
| ZB3-3-56 | 240.4 | 199.7 | 0.83 | 21.12 | 0.3657 | 0.05 | 0.0025 | 298.2 | 5.1 | 214  | 98  | 98  | YES | 298.2  | 2.5  |

|          |       |       |      |       |        |      |        |       |     |      |     |     |     |        |      |
|----------|-------|-------|------|-------|--------|------|--------|-------|-----|------|-----|-----|-----|--------|------|
| ZB3-3-57 | 87.1  | 73.3  | 0.84 | 21.14 | 0.4470 | 0.05 | 0.0035 | 297.5 | 6.2 | -40  | 140 | 89  | NO  | 297.1  | 3.1  |
| ZB3-3-58 | 152.8 | 88.9  | 0.58 | 22.03 | 0.4366 | 0.05 | 0.0033 | 286.1 | 5.5 | 260  | 120 | 98  | YES | 286.3  | 2.8  |
| ZB3-3-59 | 125   | 60.2  | 0.48 | 20.70 | 0.4287 | 0.05 | 0.0034 | 303.9 | 6.3 | 210  | 130 | 99  | YES | 304.1  | 3.1  |
| ZB3-3-60 | 291.6 | 155.8 | 0.53 | 2.42  | 0.0394 | 0.14 | 0.0024 | 2223  | 31  | 2171 | 33  | 99  | YES | 2198.0 | 10.7 |
| ZB3-3-61 | 170.6 | 113.5 | 0.67 | 20.30 | 0.3831 | 0.05 | 0.003  | 309.9 | 5.7 | 300  | 110 | 98  | YES | 310.1  | 2.9  |
| ZB3-3-62 | 528   | 341   | 0.65 | 21.45 | 0.3587 | 0.05 | 0.0018 | 293.7 | 4.8 | 335  | 73  | 96  | YES | 294.0  | 2.4  |
| ZB3-3-63 | 161.8 | 111.8 | 0.69 | 21.89 | 0.3834 | 0.05 | 0.0027 | 287.9 | 4.9 | 140  | 110 | 96  | YES | 287.8  | 2.5  |
| ZB3-3-64 | 92.5  | 125   | 1.35 | 20.92 | 0.5252 | 0.05 | 0.0041 | 300.8 | 7.6 | 180  | 160 | 98  | YES | 301.0  | 3.7  |
| ZB3-3-65 | 63.17 | 45.74 | 0.72 | 21.55 | 0.5109 | 0.05 | 0.0043 | 292.1 | 6.7 | 150  | 160 | 96  | YES | 292.3  | 3.4  |
| ZB3-3-66 | 345   | 275   | 0.80 | 21.86 | 0.3537 | 0.05 | 0.0021 | 288.2 | 4.6 | 333  | 83  | 96  | YES | 288.5  | 2.3  |
| ZB3-3-67 | 315   | 214.5 | 0.68 | 21.21 | 0.3555 | 0.05 | 0.0021 | 296.9 | 4.8 | 226  | 85  | 99  | YES | 296.8  | 2.4  |
| ZB3-3-68 | 194.1 | 153.9 | 0.79 | 20.22 | 0.3803 | 0.05 | 0.0028 | 311   | 5.7 | 230  | 110 | 98  | YES | 311.1  | 2.9  |
| ZB3-3-69 | 130.6 | 121.1 | 0.93 | 20.43 | 0.3925 | 0.05 | 0.0028 | 307.9 | 5.8 | 130  | 110 | 95  | YES | 307.6  | 2.9  |
| ZB3-3-70 | 388.6 | 162.4 | 0.42 | 21.75 | 0.3502 | 0.05 | 0.0017 | 289.7 | 4.6 | 182  | 72  | 97  | YES | 289.4  | 2.3  |
| ZB3-3-71 | 61.3  | 26.28 | 0.43 | 22.27 | 0.4960 | 0.05 | 0.0051 | 283   | 6.4 | 80   | 180 | 95  | YES | 283.1  | 3.1  |
| ZB3-3-72 | 476.3 | 295   | 0.62 | 20.07 | 0.3423 | 0.05 | 0.0019 | 313.4 | 5.2 | 288  | 78  | 100 | YES | 313.5  | 2.6  |
| ZB3-3-73 | 196.3 | 184.8 | 0.94 | 21.92 | 0.4276 | 0.05 | 0.0025 | 287.5 | 5.5 | 201  | 100 | 98  | YES | 287.5  | 2.7  |
| ZB3-3-74 | 755.9 | 381   | 0.50 | 2.99  | 0.0465 | 0.12 | 0.002  | 1858  | 25  | 1890 | 31  | 99  | YES | 1874.9 | 9.9  |
| ZB3-3-75 | 611   | 560   | 0.92 | 19.88 | 0.3557 | 0.05 | 0.0017 | 316.3 | 5.5 | 319  | 68  | 98  | YES | 316.6  | 2.8  |
| ZB3-3-76 | 172.8 | 154.5 | 0.89 | 21.76 | 0.3977 | 0.05 | 0.0027 | 289.6 | 5.2 | 230  | 110 | 99  | YES | 289.7  | 2.6  |
| ZB3-3-77 | 46.8  | 27.72 | 0.59 | 20.88 | 0.6102 | 0.05 | 0.0069 | 301.2 | 8.7 | -40  | 240 | 90  | NO  | 301.4  | 4.3  |
| ZB3-3-78 | 211.2 | 478.3 | 2.26 | 19.69 | 0.3410 | 0.05 | 0.0026 | 319.3 | 5.4 | 286  | 98  | 99  | YES | 319.5  | 2.7  |
| ZB3-3-79 | 82.7  | 49.7  | 0.60 | 21.51 | 0.4625 | 0.05 | 0.0035 | 293.1 | 6.2 | 190  | 130 | 99  | YES | 293.0  | 3.1  |
| ZB3-3-80 | 450   | 354.2 | 0.79 | 22.02 | 0.3637 | 0.05 | 0.0021 | 286.2 | 4.6 | 341  | 80  | 96  | YES | 286.5  | 2.3  |
| ZB3-3-81 | 175.2 | 279   | 1.59 | 21.80 | 0.3753 | 0.05 | 0.0025 | 289.1 | 4.9 | 256  | 100 | 99  | YES | 289.2  | 2.4  |
| ZB3-3-82 | 135.3 | 111.3 | 0.82 | 15.67 | 0.2948 | 0.05 | 0.0028 | 398.6 | 7.4 | 270  | 110 | 97  | YES | 398.5  | 3.6  |
| ZB3-3-83 | 275.7 | 244.6 | 0.89 | 21.01 | 0.3223 | 0.05 | 0.0021 | 299.7 | 4.5 | 229  | 83  | 98  | YES | 299.6  | 2.2  |
| ZB3-3-84 | 184.2 | 284   | 1.54 | 20.58 | 0.3643 | 0.06 | 0.0026 | 305.8 | 5.3 | 378  | 99  | 95  | YES | 306.0  | 2.7  |
| ZB3-3-85 | 103.3 | 132.6 | 1.28 | 22.35 | 0.4746 | 0.05 | 0.0031 | 282   | 5.9 | 150  | 120 | 96  | YES | 282.0  | 2.9  |
| ZB3-3-86 | 122.8 | 152.8 | 1.24 | 21.83 | 0.4148 | 0.05 | 0.0028 | 288.6 | 5.4 | 210  | 110 | 99  | YES | 288.7  | 2.7  |

|           |       |       |      |       |        |      |        |       |     |      |     |     |     |        |      |
|-----------|-------|-------|------|-------|--------|------|--------|-------|-----|------|-----|-----|-----|--------|------|
| ZB3-3-87  | 136.4 | 118.1 | 0.87 | 16.72 | 0.3356 | 0.05 | 0.0027 | 374   | 7.1 | 310  | 100 | 100 | YES | 374.5  | 3.6  |
| ZB3-3-88  | 335   | 114.3 | 0.34 | 2.90  | 0.0463 | 0.11 | 0.0021 | 1907  | 26  | 1859 | 35  | 99  | YES | 1892.7 | 10.2 |
| ZB3-3-89  | 248.9 | 212.8 | 0.85 | 22.07 | 0.3749 | 0.05 | 0.0024 | 285.7 | 4.8 | 277  | 96  | 99  | YES | 285.8  | 2.4  |
| ZB3-3-90  | 106.2 | 127.8 | 1.20 | 21.83 | 0.6197 | 0.06 | 0.005  | 288.8 | 8.1 | 510  | 170 | 87  | NO  | 288.5  | 4.0  |
| ZB3-3-91  | 265.8 | 74.9  | 0.28 | 2.98  | 0.0462 | 0.12 | 0.0022 | 1863  | 25  | 1875 | 34  | 99  | YES | 1871.7 | 10.2 |
| ZB3-3-92  | 157.2 | 141.9 | 0.90 | 20.16 | 0.4065 | 0.05 | 0.0029 | 312.1 | 6.3 | 120  | 120 | 94  | YES | 311.6  | 3.1  |
| ZB3-3-93  | 114.5 | 83.9  | 0.73 | 3.00  | 0.0459 | 0.11 | 0.0024 | 1853  | 25  | 1841 | 37  | 100 | YES | 1853.6 | 10.4 |
| ZB3-3-94  | 275   | 259.3 | 0.94 | 16.42 | 0.2696 | 0.05 | 0.002  | 381.2 | 6.2 | 310  | 81  | 99  | YES | 381.0  | 3.0  |
| ZB3-3-95  | 210.5 | 157.2 | 0.75 | 21.70 | 0.4237 | 0.06 | 0.0024 | 290.4 | 5.5 | 366  | 93  | 96  | YES | 290.7  | 2.8  |
| ZB3-3-96  | 92.7  | 86.8  | 0.94 | 21.46 | 0.4605 | 0.05 | 0.0039 | 293.2 | 6.4 | 200  | 140 | 100 | YES | 293.7  | 3.1  |
| ZB3-3-97  | 226   | 246.4 | 1.09 | 21.71 | 0.4146 | 0.05 | 0.0025 | 290.2 | 5.4 | 220  | 100 | 99  | YES | 290.3  | 2.7  |
| ZB3-3-98  | 90.4  | 86.1  | 0.95 | 22.05 | 0.4522 | 0.05 | 0.0042 | 285.8 | 5.7 | 240  | 150 | 99  | YES | 286.0  | 2.9  |
| ZB3-3-99  | 244.6 | 173.8 | 0.71 | 22.09 | 0.4589 | 0.05 | 0.0022 | 285.3 | 5.8 | 223  | 91  | 98  | YES | 285.3  | 2.9  |
| ZB3-3-100 | 346   | 176.5 | 0.51 | 20.25 | 0.3773 | 0.05 | 0.002  | 310.6 | 5.6 | 282  | 80  | 100 | YES | 310.8  | 2.8  |
| ZB3-3-101 | 493   | 447   | 0.91 | 21.65 | 0.3703 | 0.06 | 0.002  | 291   | 4.8 | 446  | 76  | 93  | YES | 291.3  | 2.4  |
| ZB3-3-102 | 173   | 163.7 | 0.95 | 21.09 | 0.4225 | 0.05 | 0.0031 | 298.6 | 5.8 | 210  | 120 | 98  | YES | 298.6  | 2.9  |
| ZB3-3-103 | 135.9 | 86.2  | 0.63 | 2.08  | 0.0369 | 0.17 | 0.003  | 2526  | 36  | 2516 | 31  | 100 | YES | 2521.2 | 11.7 |
| ZB3-3-104 | 590   | 314   | 0.53 | 2.66  | 0.0426 | 0.13 | 0.0022 | 2052  | 28  | 2041 | 30  | 100 | YES | 2051.9 | 10.4 |
| ZB3-3-105 | 272.5 | 208.1 | 0.76 | 2.08  | 0.0315 | 0.17 | 0.0028 | 2536  | 31  | 2529 | 28  | 100 | YES | 2535.5 | 10.5 |
| ZB3-3-106 | 106.7 | 136.6 | 1.28 | 21.68 | 0.4231 | 0.05 | 0.0035 | 290.6 | 5.6 | 280  | 130 | 98  | YES | 290.8  | 2.8  |
| ZB3-3-107 | 152.2 | 104.2 | 0.68 | 22.33 | 0.4388 | 0.05 | 0.003  | 282.3 | 5.4 | 190  | 110 | 98  | YES | 282.4  | 2.7  |
| ZB3-3-108 | 215.7 | 339   | 1.57 | 20.86 | 0.3566 | 0.05 | 0.0024 | 301.8 | 5.1 | 251  | 91  | 100 | YES | 302.0  | 2.5  |
| ZB3-3-109 | 45.2  | 51.2  | 1.13 | 18.62 | 0.5895 | 0.05 | 0.006  | 337   | 10  | -100 | 220 | 84  | NO  | 336.4  | 5.2  |
| ZB3-3-110 | 171.4 | 92.8  | 0.54 | 22.01 | 0.4361 | 0.05 | 0.0027 | 286.3 | 5.5 | 270  | 100 | 99  | YES | 286.5  | 2.8  |
| ZB4-2-1   | 192   | 192.9 | 1.00 | 20.72 | 0.3605 | 0.06 | 0.0027 | 303.8 | 5.2 | 330  | 100 | 97  | YES | 304.0  | 2.6  |
| ZB4-2-2   | 266   | 195   | 0.73 | 21.77 | 0.4170 | 0.07 | 0.0034 | 289.5 | 5.4 | 800  | 110 | 77  | NO  | 288.0  | 2.7  |
| ZB4-2-3   | 199.5 | 92.4  | 0.46 | 21.41 | 0.3989 | 0.05 | 0.0024 | 294.2 | 5.3 | 343  | 94  | 96  | YES | 294.4  | 2.7  |
| ZB4-2-4   | 254.7 | 152.5 | 0.60 | 21.30 | 0.3903 | 0.05 | 0.0024 | 295.6 | 5.3 | 221  | 96  | 98  | YES | 295.7  | 2.6  |
| ZB4-2-5   | 233.8 | 200   | 0.86 | 21.74 | 0.3641 | 0.05 | 0.0024 | 289.8 | 4.8 | 212  | 99  | 98  | YES | 289.8  | 2.4  |
| ZB4-2-6   | 320.1 | 303.9 | 0.95 | 21.66 | 0.3379 | 0.05 | 0.002  | 290.9 | 4.4 | 228  | 80  | 99  | YES | 290.9  | 2.2  |

|          |       |       |      |       |        |      |        |       |     |      |     |     |     |        |      |
|----------|-------|-------|------|-------|--------|------|--------|-------|-----|------|-----|-----|-----|--------|------|
| ZB4-2-7  | 180.3 | 351.5 | 1.95 | 21.28 | 0.5432 | 0.05 | 0.0032 | 296   | 7.5 | 230  | 120 | 98  | YES | 296.0  | 3.7  |
| ZB4-2-8  | 138.3 | 127.8 | 0.92 | 21.23 | 0.6311 | 0.05 | 0.0062 | 296.9 | 8.7 | 150  | 240 | 96  | YES | 296.6  | 4.3  |
| ZB4-2-9  | 96.6  | 109.2 | 1.13 | 21.15 | 0.4427 | 0.05 | 0.0038 | 297.8 | 6.1 | 170  | 150 | 98  | YES | 297.8  | 3.0  |
| ZB4-2-10 | 83.7  | 46.39 | 0.55 | 21.65 | 0.5154 | 0.05 | 0.0041 | 291   | 6.8 | 180  | 150 | 99  | YES | 291.2  | 3.4  |
| ZB4-2-11 | 457.1 | 215.5 | 0.47 | 2.89  | 0.0460 | 0.11 | 0.0019 | 1912  | 26  | 1842 | 30  | 98  | YES | 1885.2 | 9.7  |
| ZB4-2-12 | 280.3 | 54.43 | 0.19 | 2.74  | 0.0422 | 0.12 | 0.0022 | 2001  | 26  | 1867 | 35  | 97  | YES | 1954.6 | 10.0 |
| ZB4-2-13 | 401.5 | 253.8 | 0.63 | 21.66 | 0.3847 | 0.05 | 0.0019 | 290.9 | 5   | 304  | 76  | 98  | YES | 291.1  | 2.5  |
| ZB4-2-14 | 311   | 210   | 0.68 | 21.04 | 0.3585 | 0.08 | 0.0042 | 299.3 | 5   | 1010 | 100 | 69  | NO  | 297.2  | 2.5  |
| ZB4-2-15 | 287.7 | 193.4 | 0.67 | 20.95 | 0.3554 | 0.05 | 0.0021 | 300.6 | 5   | 252  | 83  | 99  | YES | 300.6  | 2.5  |
| ZB4-2-16 | 356.5 | 290.9 | 0.82 | 18.28 | 0.3207 | 0.15 | 0.0071 | 343.3 | 5.8 | 2227 | 85  | 26  | NO  | 327.7  | 2.9  |
| ZB4-2-17 | 259.3 | 341.5 | 1.32 | 21.46 | 0.3501 | 0.05 | 0.002  | 293.5 | 4.7 | 229  | 83  | 98  | YES | 293.5  | 2.3  |
| ZB4-2-18 | 335.9 | 394.6 | 1.17 | 18.33 | 0.3022 | 0.19 | 0.012  | 342.4 | 5.5 | 2560 | 140 | 12  | NO  | 331.6  | 2.7  |
| ZB4-2-19 | 202.9 | 159.2 | 0.78 | 21.41 | 0.3714 | 0.05 | 0.0027 | 294.2 | 5   | 270  | 100 | 99  | YES | 294.3  | 2.5  |
| ZB4-2-20 | 95.8  | 72.9  | 0.76 | 21.46 | 0.3547 | 0.05 | 0.0038 | 293.5 | 4.7 | 230  | 150 | 98  | YES | 293.6  | 2.4  |
| ZB4-2-21 | 88.5  | 65.8  | 0.74 | 21.32 | 0.4546 | 0.05 | 0.0039 | 295.2 | 6.3 | 160  | 150 | 98  | YES | 295.4  | 3.1  |
| ZB4-2-22 | 339.8 | 118.1 | 0.35 | 3.02  | 0.0473 | 0.11 | 0.0021 | 1844  | 25  | 1803 | 34  | 99  | YES | 1834.5 | 10.0 |
| ZB4-2-23 | 592.6 | 138   | 0.23 | 2.08  | 0.0285 | 0.16 | 0.0027 | 2530  | 29  | 2477 | 28  | 99  | YES | 2507.0 | 9.9  |
| ZB4-2-24 | 205.2 | 238.8 | 1.16 | 20.88 | 0.4794 | 0.05 | 0.0033 | 301.5 | 6.9 | 300  | 120 | 99  | YES | 301.7  | 3.4  |
| ZB4-2-25 | 324.7 | 325.1 | 1.00 | 19.97 | 0.2912 | 0.05 | 0.0019 | 314.9 | 4.5 | 263  | 78  | 99  | YES | 314.9  | 2.2  |
| ZB4-2-26 | 210.7 | 256.5 | 1.22 | 21.87 | 0.3921 | 0.05 | 0.0027 | 288.2 | 5.1 | 300  | 100 | 97  | YES | 288.4  | 2.5  |
| ZB4-2-27 | 237.9 | 162.6 | 0.68 | 20.45 | 0.6691 | 0.05 | 0.0036 | 308   | 10  | 320  | 140 | 99  | YES | 308.0  | 4.9  |
| ZB4-2-28 | 436   | 320   | 0.73 | 21.61 | 0.3597 | 0.05 | 0.0018 | 291.5 | 4.7 | 226  | 75  | 99  | YES | 291.4  | 2.4  |
| ZB4-2-29 | 516.1 | 392.7 | 0.76 | 21.28 | 0.3215 | 0.07 | 0.002  | 295.9 | 4.4 | 778  | 60  | 80  | NO  | 294.3  | 2.2  |
| ZB4-2-30 | 179.7 | 95.4  | 0.53 | 2.07  | 0.0291 | 0.17 | 0.003  | 2540  | 30  | 2549 | 29  | 100 | YES | 2548.2 | 10.5 |
| ZB4-2-31 | 427.9 | 241.2 | 0.56 | 21.27 | 0.3302 | 0.05 | 0.0018 | 296.1 | 4.5 | 251  | 74  | 99  | YES | 296.1  | 2.2  |
| ZB4-2-32 | 96.1  | 137.3 | 1.43 | 22.12 | 0.4797 | 0.06 | 0.0043 | 284.9 | 6   | 560  | 140 | 85  | NO  | 284.5  | 3.0  |
| ZB4-2-33 | 27.79 | 45.46 | 1.64 | 21.51 | 0.7400 | 0.04 | 0.0067 | 292.6 | 9.5 | -380 | 250 | 73  | NO  | 291.4  | 4.9  |
| ZB4-2-34 | 150.9 | 88.3  | 0.59 | 2.94  | 0.0632 | 0.11 | 0.003  | 1884  | 35  | 1847 | 49  | 99  | YES | 1877.2 | 14.0 |
| ZB4-2-35 | 455   | 202.2 | 0.44 | 19.49 | 0.6840 | 0.05 | 0.0034 | 323   | 11  | 300  | 140 | 99  | YES | 322.6  | 5.5  |
| ZB4-2-36 | 421.4 | 477   | 1.13 | 21.83 | 0.5244 | 0.05 | 0.0028 | 288.4 | 6.7 | 260  | 110 | 100 | YES | 288.8  | 3.4  |



|          |       |       |      |       |        |      |        |       |     |      |     |     |     |        |      |
|----------|-------|-------|------|-------|--------|------|--------|-------|-----|------|-----|-----|-----|--------|------|
| ZB4-2-37 | 303.7 | 237.7 | 0.78 | 2.99  | 0.0465 | 0.12 | 0.0021 | 1857  | 25  | 1873 | 33  | 99  | YES | 1867.6 | 10.1 |
| ZB4-2-38 | 190.5 | 201.9 | 1.06 | 16.95 | 0.3447 | 0.06 | 0.0023 | 369.2 | 7   | 486  | 85  | 94  | YES | 370.1  | 3.7  |
| ZB4-2-39 | 303   | 586   | 1.93 | 21.83 | 0.5721 | 0.05 | 0.0032 | 288.3 | 7.2 | 230  | 120 | 100 | YES | 288.7  | 3.7  |
| ZB4-2-40 | 69.3  | 58.8  | 0.85 | 1.98  | 0.0333 | 0.18 | 0.0035 | 2632  | 36  | 2674 | 32  | 99  | YES | 2659.7 | 12.1 |
| ZB4-2-41 | 434   | 348   | 0.80 | 16.81 | 0.4237 | 0.05 | 0.0026 | 372.3 | 8.8 | 360  | 100 | 99  | YES | 372.8  | 4.6  |
| ZB4-2-42 | 477   | 33.46 | 0.07 | 2.10  | 0.0277 | 0.16 | 0.0026 | 2511  | 28  | 2503 | 27  | 100 | YES | 2509.6 | 9.5  |
| ZB4-2-43 | 285.5 | 420   | 1.47 | 21.79 | 0.4082 | 0.05 | 0.0025 | 289.2 | 5.3 | 254  | 100 | 100 | YES | 289.4  | 2.7  |
| ZB4-2-44 | 823   | 319.9 | 0.39 | 21.55 | 0.6038 | 0.05 | 0.0023 | 292.3 | 8.2 | 297  | 95  | 100 | YES | 292.6  | 4.0  |
| ZB4-2-45 | 144.4 | 161.4 | 1.12 | 21.72 | 0.4201 | 0.05 | 0.003  | 290   | 5.5 | 130  | 120 | 95  | YES | 289.9  | 2.7  |
| ZB4-2-46 | 335.6 | 482   | 1.44 | 19.21 | 0.3321 | 0.13 | 0.0097 | 327   | 5.5 | 1850 | 140 | 34  | NO  | 322.1  | 2.7  |
| ZB4-2-47 | 342   | 183.6 | 0.54 | 21.98 | 0.9178 | 0.06 | 0.005  | 287   | 12  | 440  | 190 | 93  | YES | 287.0  | 5.9  |
| ZB4-2-48 | 451   | 85    | 0.19 | 2.76  | 0.0412 | 0.12 | 0.0023 | 1991  | 26  | 2008 | 32  | 99  | YES | 2000.5 | 10.2 |
| ZB4-2-49 | 207.5 | 135   | 0.65 | 20.49 | 0.7139 | 0.05 | 0.0052 | 307   | 11  | 290  | 200 | 98  | YES | 307.3  | 5.2  |
| ZB4-2-50 | 753   | 482.6 | 0.64 | 20.99 | 0.3657 | 0.06 | 0.0019 | 299.9 | 5.1 | 386  | 75  | 95  | YES | 300.3  | 2.6  |
| ZB4-2-51 | 682   | 378   | 0.55 | 10.05 | 0.7677 | 0.12 | 0.0055 | 606   | 45  | 1854 | 80  | 61  | NO  | 370.2  | 19.8 |
| ZB4-2-52 | 389.7 | 306.2 | 0.79 | 21.96 | 0.3907 | 0.05 | 0.002  | 286.9 | 5   | 228  | 83  | 99  | YES | 287.0  | 2.5  |
| ZB4-2-53 | 433   | 221   | 0.51 | 2.13  | 0.0543 | 0.17 | 0.0039 | 2479  | 52  | 2512 | 39  | 99  | YES | 2508.2 | 15.9 |
| ZB4-2-54 | 250.7 | 265   | 1.06 | 19.72 | 0.5446 | 0.05 | 0.0032 | 318.8 | 8.8 | 280  | 130 | 100 | YES | 318.8  | 4.3  |
| ZB4-2-55 | 264.6 | 240.5 | 0.91 | 19.53 | 0.7248 | 0.05 | 0.0049 | 322   | 12  | 150  | 200 | 95  | YES | 321.5  | 5.8  |
| ZB4-2-56 | 179.5 | 60.1  | 0.33 | 1.98  | 0.0278 | 0.17 | 0.0031 | 2633  | 31  | 2545 | 31  | 98  | YES | 2594.4 | 10.5 |
| ZB4-2-57 | 439   | 316   | 0.72 | 2.13  | 0.0382 | 0.17 | 0.0029 | 2475  | 37  | 2522 | 29  | 99  | YES | 2509.6 | 11.6 |
| ZB4-2-58 | 652   | 415.3 | 0.64 | 21.01 | 0.4855 | 0.05 | 0.0021 | 299.4 | 6.5 | 292  | 88  | 99  | YES | 299.9  | 3.4  |
| ZB4-2-59 | 439   | 215   | 0.49 | 21.69 | 0.4092 | 0.05 | 0.0027 | 290.5 | 5.4 | 260  | 110 | 99  | YES | 290.6  | 2.7  |
| ZB4-2-60 | 809   | 366.6 | 0.45 | 21.58 | 0.3865 | 0.05 | 0.0016 | 291.9 | 5.1 | 360  | 66  | 96  | YES | 292.4  | 2.6  |
| ZB4-2-61 | 924   | 567.5 | 0.61 | 2.99  | 0.0457 | 0.11 | 0.0019 | 1855  | 25  | 1867 | 30  | 99  | YES | 1862.9 | 9.6  |
| ZB4-2-62 | 220.6 | 101.7 | 0.46 | 20.17 | 0.3907 | 0.05 | 0.0029 | 311.8 | 5.9 | 190  | 110 | 98  | YES | 311.8  | 2.9  |
| ZB4-2-63 | 207.4 | 171.1 | 0.82 | 22.33 | 0.4337 | 0.05 | 0.0029 | 282.4 | 5.4 | 330  | 110 | 96  | YES | 282.6  | 2.7  |
| ZB4-2-64 | 687   | 335.3 | 0.49 | 2.11  | 0.0308 | 0.17 | 0.0027 | 2494  | 30  | 2515 | 28  | 99  | YES | 2508.9 | 10.2 |
| ZB4-2-65 | 1119  | 578   | 0.52 | 20.15 | 0.3006 | 0.05 | 0.0015 | 312.2 | 4.5 | 315  | 61  | 99  | YES | 312.3  | 2.3  |
| ZB4-2-66 | 850   | 129.2 | 0.15 | 18.90 | 0.3251 | 0.12 | 0.0034 | 332.2 | 5.6 | 1949 | 50  | 37  | NO  | 300.9  | 2.7  |

|          |       |       |      |       |        |      |        |       |     |      |     |     |     |        |      |
|----------|-------|-------|------|-------|--------|------|--------|-------|-----|------|-----|-----|-----|--------|------|
| ZB4-2-67 | 227.1 | 165.3 | 0.73 | 21.51 | 0.4027 | 0.10 | 0.0084 | 292.8 | 5.4 | 1250 | 160 | 54  | NO  | 290.6  | 2.7  |
| ZB4-2-68 | 818   | 488.3 | 0.60 | 22.32 | 0.3735 | 0.05 | 0.0018 | 282.5 | 4.6 | 276  | 72  | 99  | YES | 282.7  | 2.3  |
| ZB4-2-69 | 426   | 288   | 0.68 | 22.50 | 0.3745 | 0.05 | 0.0023 | 280.3 | 4.6 | 230  | 95  | 100 | YES | 280.4  | 2.3  |
| ZB4-2-70 | 233.9 | 74.2  | 0.32 | 3.06  | 0.1122 | 0.12 | 0.0053 | 1822  | 58  | 1883 | 85  | 98  | YES | 1848.7 | 24.5 |
| ZB4-2-71 | 224.4 | 190   | 0.85 | 21.56 | 0.4509 | 0.05 | 0.0029 | 292.2 | 5.9 | 210  | 120 | 99  | YES | 292.2  | 3.0  |
| ZB4-2-72 | 460.6 | 132   | 0.29 | 16.78 | 0.2815 | 0.06 | 0.0021 | 373.1 | 6.1 | 395  | 80  | 97  | YES | 373.5  | 3.0  |
| ZB4-2-73 | 237   | 206.9 | 0.87 | 21.88 | 0.4357 | 0.05 | 0.0031 | 288   | 5.6 | 290  | 120 | 97  | YES | 288.2  | 2.8  |
| ZB4-2-74 | 879   | 396.8 | 0.45 | 17.18 | 0.2687 | 0.05 | 0.0014 | 364.6 | 5.5 | 326  | 59  | 100 | YES | 364.5  | 2.8  |
| ZB4-2-75 | 89.6  | 142.6 | 1.59 | 21.32 | 0.5001 | 0.05 | 0.0042 | 295.5 | 6.6 | 110  | 160 | 96  | YES | 295.4  | 3.4  |
| ZB4-2-76 | 498   | 190.7 | 0.38 | 2.11  | 0.0400 | 0.16 | 0.0032 | 2499  | 39  | 2484 | 34  | 100 | YES | 2494.1 | 12.6 |
| ZB4-2-77 | 896   | 57.6  | 0.06 | 3.01  | 0.0462 | 0.12 | 0.002  | 1847  | 25  | 1878 | 31  | 99  | YES | 1862.2 | 9.8  |
| ZB4-2-78 | 152.9 | 168.8 | 1.10 | 22.32 | 0.4185 | 0.06 | 0.0031 | 282.4 | 5.2 | 360  | 120 | 94  | YES | 282.6  | 2.6  |
| ZB4-2-79 | 327.8 | 290.4 | 0.89 | 20.83 | 0.3819 | 0.05 | 0.0023 | 302.1 | 5.4 | 343  | 88  | 96  | YES | 302.4  | 2.7  |
| ZB4-2-80 | 795   | 268.1 | 0.34 | 2.96  | 0.0411 | 0.11 | 0.0017 | 1876  | 23  | 1850 | 27  | 100 | YES | 1868.1 | 8.6  |
| ZB4-2-81 | 670   | 858   | 1.28 | 20.37 | 0.3320 | 0.05 | 0.0015 | 308.8 | 4.9 | 304  | 61  | 99  | YES | 309.0  | 2.5  |
| ZB4-2-82 | 648   | 634   | 0.98 | 21.78 | 0.4175 | 0.05 | 0.0016 | 289.3 | 5.4 | 293  | 64  | 98  | YES | 289.5  | 2.7  |
| ZB4-2-83 | 419.7 | 43.9  | 0.10 | 3.05  | 0.0519 | 0.11 | 0.0019 | 1829  | 27  | 1799 | 32  | 100 | YES | 1819.6 | 10.2 |
| ZB4-2-84 | 803   | 573   | 0.71 | 2.27  | 0.0568 | 0.17 | 0.0041 | 2347  | 50  | 2510 | 42  | 96  | YES | 2447.7 | 16.7 |
| ZB4-2-85 | 496   | 377   | 0.76 | 2.79  | 0.0475 | 0.12 | 0.0024 | 1972  | 29  | 2017 | 33  | 98  | YES | 1996.0 | 11.2 |
| ZB4-2-86 | 672.8 | 1005  | 1.49 | 21.12 | 0.3659 | 0.05 | 0.0015 | 298.1 | 5   | 316  | 60  | 98  | YES | 298.4  | 2.5  |
| ZB4-2-87 | 169.4 | 296.4 | 1.75 | 21.99 | 0.3434 | 0.05 | 0.0026 | 286.6 | 4.4 | 216  | 100 | 99  | YES | 286.6  | 2.2  |
| ZB4-2-88 | 194.9 | 322.9 | 1.66 | 22.37 | 0.4302 | 0.05 | 0.0024 | 281.9 | 5.3 | 163  | 98  | 97  | YES | 281.8  | 2.7  |
| ZB4-2-89 | 128   | 121.2 | 0.95 | 2.83  | 0.0648 | 0.13 | 0.0036 | 1949  | 38  | 2081 | 49  | 96  | YES | 2005.2 | 16.0 |
| ZB4-2-90 | 724   | 597   | 0.82 | 3.04  | 0.0508 | 0.12 | 0.0019 | 1831  | 27  | 1887 | 31  | 98  | YES | 1859.0 | 10.1 |
| ZB4-2-91 | 559   | 207   | 0.37 | 20.33 | 0.4009 | 0.06 | 0.0016 | 309.4 | 6   | 393  | 63  | 95  | YES | 310.1  | 3.0  |
| ZB4-2-92 | 213.6 | 475   | 2.22 | 22.02 | 0.4169 | 0.05 | 0.0022 | 286.2 | 5.3 | 246  | 90  | 99  | YES | 286.4  | 2.7  |
| ZB4-2-93 | 74.5  | 153   | 2.05 | 20.33 | 0.4957 | 0.08 | 0.0051 | 309.5 | 7.6 | 940  | 130 | 71  | NO  | 306.9  | 3.7  |
| ZB4-2-94 | 220.4 | 248   | 1.13 | 16.45 | 0.2976 | 0.05 | 0.0022 | 380.3 | 6.7 | 350  | 84  | 99  | YES | 380.6  | 3.3  |
| ZB4-2-95 | 98.4  | 176.1 | 1.79 | 20.41 | 0.4581 | 0.05 | 0.0032 | 308.1 | 6.5 | 210  | 120 | 98  | YES | 308.4  | 3.4  |
| ZB4-2-96 | 77.2  | 163   | 2.11 | 20.04 | 0.4819 | 0.05 | 0.0035 | 313.9 | 7.4 | 230  | 130 | 98  | YES | 313.9  | 3.7  |

|           |       |       |      |       |        |      |        |       |     |      |     |     |     |        |      |
|-----------|-------|-------|------|-------|--------|------|--------|-------|-----|------|-----|-----|-----|--------|------|
| ZB4-2-97  | 393   | 258.5 | 0.66 | 22.27 | 0.8929 | 0.05 | 0.0043 | 283   | 11  | 330  | 160 | 96  | YES | 283.3  | 5.6  |
| ZB4-2-98  | 422   | 677   | 1.60 | 22.08 | 0.8284 | 0.05 | 0.0035 | 285   | 10  | 260  | 150 | 100 | YES | 285.6  | 5.2  |
| ZB4-2-99  | 985   | 314.7 | 0.32 | 3.33  | 0.0565 | 0.11 | 0.0018 | 1691  | 25  | 1816 | 29  | 96  | YES | 1745.1 | 10.1 |
| ZB4-2-100 | 203.3 | 287.3 | 1.41 | 20.44 | 0.3383 | 0.05 | 0.0023 | 307.9 | 5   | 223  | 92  | 99  | YES | 307.9  | 2.5  |
| ZB4-2-101 | 90.2  | 104   | 1.15 | 22.32 | 0.5481 | 0.06 | 0.004  | 282.5 | 6.6 | 350  | 140 | 93  | YES | 282.6  | 3.4  |
| ZB4-2-102 | 55.06 | 44.68 | 0.81 | 22.22 | 0.5432 | 0.06 | 0.0045 | 283.9 | 6.5 | 290  | 170 | 97  | YES | 283.8  | 3.4  |
| ZB4-2-103 | 114.9 | 215   | 1.87 | 19.46 | 0.3785 | 0.05 | 0.0032 | 323.1 | 6.3 | 150  | 120 | 96  | YES | 322.9  | 3.1  |
| ZB4-2-104 | 248   | 160.1 | 0.65 | 20.35 | 0.4100 | 0.05 | 0.0019 | 309.1 | 6.1 | 239  | 79  | 99  | YES | 309.1  | 3.0  |
| ZB4-2-105 | 542   | 768   | 1.42 | 2.61  | 0.0456 | 0.17 | 0.0028 | 2089  | 31  | 2545 | 28  | 89  | NO  | 2331.8 | 12.5 |
| ZB4-2-106 | 219.2 | 223   | 1.02 | 18.05 | 0.3258 | 0.06 | 0.0024 | 347.7 | 6.1 | 526  | 90  | 91  | YES | 347.9  | 3.1  |
| ZB4-2-107 | 312   | 130.7 | 0.42 | 2.11  | 0.0356 | 0.17 | 0.0031 | 2497  | 35  | 2507 | 31  | 99  | YES | 2509.9 | 11.7 |
| ZB4-2-108 | 220.5 | 168.8 | 0.77 | 2.01  | 0.0324 | 0.17 | 0.003  | 2598  | 34  | 2546 | 30  | 99  | YES | 2574.7 | 11.1 |
| ZB4-2-109 | 474   | 256.6 | 0.54 | 3.09  | 0.0565 | 0.11 | 0.002  | 1803  | 29  | 1858 | 33  | 98  | YES | 1831.1 | 10.9 |
| ZB4-2-110 | 307   | 171.5 | 0.56 | 21.55 | 1.0218 | 0.06 | 0.0046 | 292   | 14  | 380  | 170 | 95  | YES | 292.7  | 6.8  |
| ZB4-4-1   | 723.7 | 250.6 | 0.35 | 2.10  | 0.0234 | 0.16 | 0.0022 | 2508  | 23  | 2503 | 22  | 100 | YES | 2507.7 | 8.1  |
| ZB4-4-2   | 496   | 66.4  | 0.13 | 2.87  | 0.0321 | 0.11 | 0.0017 | 1927  | 19  | 1854 | 28  | 98  | YES | 1904.8 | 7.5  |
| ZB4-4-3   | 419.4 | 57.2  | 0.14 | 2.04  | 0.0254 | 0.16 | 0.0024 | 2570  | 27  | 2497 | 25  | 99  | YES | 2532.3 | 8.8  |
| ZB4-4-4   | 233.8 | 154.6 | 0.66 | 3.07  | 0.0386 | 0.11 | 0.0019 | 1816  | 20  | 1830 | 31  | 99  | YES | 1823.5 | 8.4  |
| ZB4-4-5   | 391.9 | 273.7 | 0.70 | 2.07  | 0.0279 | 0.17 | 0.0024 | 2538  | 28  | 2529 | 24  | 100 | YES | 2536.3 | 9.1  |
| ZB4-4-6   | 125.3 | 95.2  | 0.76 | 2.02  | 0.0229 | 0.16 | 0.0026 | 2593  | 24  | 2489 | 27  | 98  | YES | 2547.0 | 8.7  |
| ZB4-4-7   | 196.5 | 288.7 | 1.47 | 2.09  | 0.0523 | 0.17 | 0.0037 | 2521  | 51  | 2506 | 38  | 100 | YES | 2515.6 | 15.2 |
| ZB4-4-8   | 139.2 | 59    | 0.42 | 2.14  | 0.0550 | 0.17 | 0.0047 | 2469  | 52  | 2594 | 49  | 97  | YES | 2537.9 | 17.8 |
| ZB4-4-9   | 124.3 | 53.2  | 0.43 | 1.98  | 0.0251 | 0.17 | 0.0028 | 2632  | 27  | 2526 | 29  | 98  | YES | 2580.8 | 9.5  |
| ZB4-4-10  | 280.8 | 82.3  | 0.29 | 2.93  | 0.0369 | 0.11 | 0.0019 | 1891  | 21  | 1850 | 30  | 99  | YES | 1879.9 | 8.4  |
| ZB4-4-11  | 552   | 106.4 | 0.19 | 2.90  | 0.0420 | 0.11 | 0.0018 | 1909  | 24  | 1860 | 28  | 99  | YES | 1891.8 | 9.0  |
| ZB4-4-12  | 363.7 | 132.4 | 0.36 | 1.58  | 0.0220 | 0.25 | 0.0037 | 3156  | 35  | 3195 | 23  | 99  | YES | 3187.0 | 9.7  |
| ZB4-4-13  | 315   | 46.1  | 0.15 | 2.89  | 0.0368 | 0.12 | 0.002  | 1914  | 21  | 1873 | 31  | 99  | YES | 1904.4 | 8.6  |
| ZB4-4-14  | 89.9  | 76.2  | 0.85 | 2.09  | 0.0292 | 0.16 | 0.0029 | 2521  | 29  | 2499 | 30  | 100 | YES | 2513.6 | 10.3 |
| ZB4-4-15  | 15.33 | 15.31 | 1.00 | 2.85  | 0.0812 | 0.11 | 0.0064 | 1935  | 50  | 1710 | 120 | 95  | YES | 1909.6 | 20.9 |
| ZB4-4-16  | 369.8 | 318   | 0.86 | 2.08  | 0.0284 | 0.17 | 0.0027 | 2533  | 29  | 2515 | 27  | 100 | YES | 2527.9 | 9.8  |

|          |       |       |      |       |        |      |        |       |     |      |     |     |     |        |      |
|----------|-------|-------|------|-------|--------|------|--------|-------|-----|------|-----|-----|-----|--------|------|
| ZB4-4-17 | 110   | 77.3  | 0.70 | 19.19 | 0.4789 | 0.05 | 0.0038 | 327.6 | 7.7 | 220  | 150 | 97  | YES | 327.3  | 4.0  |
| ZB4-4-18 | 745   | 485   | 0.65 | 19.48 | 0.2771 | 0.05 | 0.0014 | 322.6 | 4.5 | 260  | 60  | 98  | YES | 322.4  | 2.2  |
| ZB4-4-19 | 122.7 | 82.8  | 0.67 | 2.90  | 0.0419 | 0.11 | 0.0024 | 1910  | 24  | 1818 | 40  | 98  | YES | 1889.6 | 9.9  |
| ZB4-4-20 | 264.4 | 327.2 | 1.24 | 21.81 | 0.3138 | 0.05 | 0.0021 | 289   | 4.1 | 341  | 84  | 97  | YES | 289.2  | 2.0  |
| ZB4-4-21 | 325   | 45.77 | 0.14 | 2.95  | 0.0392 | 0.11 | 0.002  | 1880  | 21  | 1807 | 33  | 98  | YES | 1860.6 | 8.8  |
| ZB4-4-22 | 88.3  | 122.5 | 1.39 | 18.48 | 0.4100 | 0.05 | 0.0034 | 339.6 | 7.3 | 160  | 130 | 94  | YES | 339.4  | 3.7  |
| ZB4-4-23 | 392.6 | 95.3  | 0.24 | 2.90  | 0.0371 | 0.11 | 0.002  | 1907  | 21  | 1855 | 32  | 99  | YES | 1894.1 | 8.6  |
| ZB4-4-24 | 253.9 | 60.4  | 0.24 | 3.05  | 0.0428 | 0.11 | 0.002  | 1826  | 22  | 1847 | 33  | 100 | YES | 1835.9 | 9.2  |
| ZB4-4-25 | 38.99 | 24.58 | 0.63 | 2.49  | 0.0415 | 0.13 | 0.0035 | 2175  | 31  | 2104 | 47  | 98  | YES | 2160.1 | 12.6 |
| ZB4-4-26 | 236.1 | 55.1  | 0.23 | 2.85  | 0.0413 | 0.12 | 0.0023 | 1939  | 24  | 1879 | 35  | 99  | YES | 1924.8 | 9.9  |
| ZB4-4-27 | 353.2 | 67    | 0.19 | 3.13  | 0.0430 | 0.11 | 0.0019 | 1788  | 22  | 1821 | 32  | 99  | YES | 1802.2 | 9.0  |
| ZB4-4-28 | 460   | 344.2 | 0.75 | 2.92  | 0.0436 | 0.11 | 0.0019 | 1894  | 24  | 1860 | 30  | 99  | YES | 1884.6 | 9.4  |
| ZB4-4-29 | 261.1 | 51.6  | 0.20 | 2.85  | 0.0497 | 0.12 | 0.0021 | 1935  | 29  | 1878 | 32  | 99  | YES | 1914.6 | 10.7 |
| ZB4-4-30 | 299.9 | 41.9  | 0.14 | 2.92  | 0.0400 | 0.12 | 0.0019 | 1899  | 23  | 1874 | 30  | 99  | YES | 1893.8 | 8.9  |
| ZB4-4-31 | 373.7 | 201.1 | 0.54 | 2.89  | 0.0416 | 0.11 | 0.002  | 1916  | 24  | 1855 | 32  | 98  | YES | 1898.2 | 9.4  |
| ZB4-4-32 | 94.4  | 53.3  | 0.56 | 1.96  | 0.0316 | 0.17 | 0.0029 | 2651  | 35  | 2504 | 31  | 97  | YES | 2568.9 | 10.9 |
| ZB4-4-33 | 299   | 698   | 2.33 | 2.03  | 0.0297 | 0.17 | 0.0025 | 2577  | 31  | 2526 | 25  | 99  | YES | 2550.1 | 9.6  |
| ZB4-4-34 | 330.1 | 293.4 | 0.89 | 18.32 | 0.2650 | 0.05 | 0.002  | 342.6 | 4.9 | 355  | 77  | 98  | YES | 342.9  | 2.4  |
| ZB4-4-35 | 344.2 | 134.2 | 0.39 | 2.96  | 0.0456 | 0.11 | 0.002  | 1874  | 25  | 1807 | 33  | 98  | YES | 1852.4 | 9.7  |
| ZB4-4-36 | 134.2 | 121.5 | 0.91 | 15.58 | 0.3154 | 0.05 | 0.0027 | 400.8 | 7.7 | 310  | 110 | 98  | YES | 401.1  | 3.9  |
| ZB4-4-37 | 140.1 | 181.9 | 1.30 | 2.04  | 0.0304 | 0.16 | 0.0029 | 2569  | 31  | 2491 | 31  | 98  | YES | 2531.4 | 10.6 |
| ZB4-4-38 | 497   | 23.98 | 0.05 | 3.02  | 0.0448 | 0.11 | 0.002  | 1840  | 24  | 1853 | 32  | 100 | YES | 1848.6 | 9.6  |
| ZB4-4-39 | 556.8 | 90.8  | 0.16 | 2.88  | 0.0381 | 0.12 | 0.002  | 1921  | 22  | 2016 | 28  | 98  | YES | 1958.0 | 9.1  |
| ZB4-4-40 | 103.4 | 84.1  | 0.81 | 2.01  | 0.0314 | 0.17 | 0.003  | 2604  | 34  | 2518 | 30  | 98  | YES | 2561.8 | 11.0 |
| ZB4-4-41 | 148.6 | 123.6 | 0.83 | 19.05 | 0.3413 | 0.05 | 0.003  | 329.6 | 5.7 | 120  | 120 | 93  | YES | 329.3  | 2.9  |
| ZB4-4-42 | 124.7 | 27.77 | 0.22 | 2.11  | 0.0338 | 0.17 | 0.003  | 2499  | 33  | 2516 | 30  | 100 | YES | 2512.5 | 11.3 |
| ZB4-4-43 | 113.7 | 84.9  | 0.75 | 19.25 | 0.3521 | 0.05 | 0.0028 | 326.3 | 5.8 | 250  | 110 | 98  | YES | 326.4  | 2.9  |
| ZB4-4-44 | 316.4 | 116.6 | 0.37 | 2.97  | 0.0423 | 0.12 | 0.002  | 1873  | 24  | 1903 | 30  | 99  | YES | 1882.9 | 9.4  |
| ZB4-4-45 | 275.6 | 282.4 | 1.02 | 20.25 | 0.3280 | 0.05 | 0.0021 | 310.7 | 4.9 | 239  | 83  | 98  | YES | 310.7  | 2.5  |
| ZB4-4-46 | 18.44 | 18.41 | 1.00 | 3.06  | 0.0496 | 0.11 | 0.0045 | 1822  | 26  | 1671 | 81  | 97  | YES | 1814.6 | 12.0 |

|          |       |       |      |       |        |      |        |       |     |      |     |     |     |        |      |
|----------|-------|-------|------|-------|--------|------|--------|-------|-----|------|-----|-----|-----|--------|------|
| ZB4-4-47 | 243   | 92.1  | 0.38 | 2.91  | 0.0467 | 0.11 | 0.0019 | 1900  | 26  | 1805 | 32  | 98  | YES | 1863.7 | 9.8  |
| ZB4-4-48 | 56.9  | 52.8  | 0.93 | 1.96  | 0.0277 | 0.17 | 0.004  | 2652  | 31  | 2559 | 37  | 98  | YES | 2621.8 | 11.7 |
| ZB4-4-49 | 183.6 | 83.3  | 0.45 | 2.80  | 0.0414 | 0.11 | 0.0023 | 1969  | 25  | 1845 | 37  | 97  | YES | 1932.2 | 10.0 |
| ZB4-4-50 | 178.7 | 258.9 | 1.45 | 2.07  | 0.0334 | 0.16 | 0.003  | 2540  | 34  | 2483 | 31  | 99  | YES | 2515.2 | 11.3 |
| ZB4-4-51 | 357.4 | 79.2  | 0.22 | 2.95  | 0.0461 | 0.12 | 0.0021 | 1879  | 25  | 1871 | 33  | 100 | YES | 1881.1 | 10.1 |
| ZB4-4-52 | 451.3 | 355.5 | 0.79 | 18.85 | 0.3232 | 0.10 | 0.0027 | 333.2 | 5.6 | 1508 | 56  | 54  | NO  | 314.5  | 2.8  |
| ZB4-4-53 | 239.6 | 113.5 | 0.47 | 2.02  | 0.0311 | 0.17 | 0.0031 | 2588  | 33  | 2548 | 31  | 99  | YES | 2572.6 | 11.1 |
| ZB4-4-54 | 333.4 | 115.6 | 0.35 | 2.90  | 0.0454 | 0.12 | 0.0021 | 1908  | 26  | 1876 | 33  | 99  | YES | 1900.3 | 10.1 |
| ZB4-4-55 | 209   | 70.8  | 0.34 | 2.84  | 0.0419 | 0.11 | 0.0021 | 1944  | 25  | 1842 | 33  | 98  | YES | 1910.1 | 9.6  |
| ZB4-4-56 | 424   | 162.5 | 0.38 | 2.38  | 0.0413 | 0.14 | 0.0023 | 2262  | 32  | 2160 | 31  | 97  | YES | 2207.8 | 10.8 |
| ZB4-4-57 | 408.7 | 53.91 | 0.13 | 2.90  | 0.0454 | 0.11 | 0.0021 | 1909  | 26  | 1854 | 33  | 99  | YES | 1892.5 | 10.0 |
| ZB4-4-58 | 405.2 | 80    | 0.20 | 2.96  | 0.0428 | 0.11 | 0.002  | 1877  | 24  | 1839 | 32  | 99  | YES | 1867.4 | 9.4  |
| ZB4-4-59 | 439.3 | 323.8 | 0.74 | 2.06  | 0.0288 | 0.16 | 0.0025 | 2551  | 29  | 2488 | 27  | 99  | YES | 2517.4 | 9.5  |
| ZB4-4-60 | 334.4 | 258.2 | 0.77 | 2.87  | 0.0419 | 0.12 | 0.0023 | 1927  | 24  | 1883 | 36  | 99  | YES | 1918.0 | 9.9  |
| ZB4-4-61 | 184.2 | 63.5  | 0.34 | 2.91  | 0.0424 | 0.12 | 0.0023 | 1902  | 24  | 1877 | 36  | 99  | YES | 1898.2 | 9.9  |
| ZB4-4-62 | 460.1 | 381.4 | 0.83 | 21.02 | 0.3138 | 0.05 | 0.0019 | 299.6 | 4.4 | 285  | 75  | 100 | YES | 299.7  | 2.2  |
| ZB4-4-63 | 80.4  | 47.44 | 0.59 | 16.75 | 0.3367 | 0.06 | 0.0036 | 373.7 | 7.5 | 350  | 130 | 98  | YES | 374.0  | 3.7  |
| ZB4-4-64 | 702   | 23.55 | 0.03 | 2.89  | 0.0459 | 0.11 | 0.0022 | 1914  | 26  | 1863 | 35  | 99  | YES | 1900.4 | 10.3 |
| ZB4-4-65 | 404.9 | 87.6  | 0.22 | 2.85  | 0.0423 | 0.12 | 0.002  | 1935  | 25  | 1875 | 32  | 98  | YES | 1914.8 | 9.5  |
| ZB4-4-66 | 580   | 67.3  | 0.12 | 2.80  | 0.0399 | 0.11 | 0.0019 | 1968  | 24  | 1871 | 30  | 98  | YES | 1931.1 | 9.1  |
| ZB4-4-67 | 361.3 | 141.7 | 0.39 | 2.92  | 0.0402 | 0.12 | 0.002  | 1894  | 23  | 1904 | 32  | 100 | YES | 1900.3 | 9.1  |
| ZB4-4-68 | 288   | 37.64 | 0.13 | 2.93  | 0.0464 | 0.11 | 0.0021 | 1891  | 26  | 1827 | 34  | 98  | YES | 1870.9 | 10.1 |
| ZB4-4-69 | 260.5 | 55.3  | 0.21 | 2.97  | 0.0602 | 0.11 | 0.0027 | 1867  | 33  | 1860 | 41  | 100 | YES | 1867.7 | 13.0 |
| ZB4-4-70 | 48.28 | 79.5  | 1.65 | 2.09  | 0.0351 | 0.16 | 0.0034 | 2514  | 35  | 2457 | 35  | 99  | YES | 2491.6 | 12.3 |
| ZB4-4-71 | 746   | 337   | 0.45 | 2.82  | 0.0515 | 0.12 | 0.002  | 1956  | 31  | 1988 | 30  | 99  | YES | 1978.1 | 10.7 |
| ZB4-4-72 | 659   | 62    | 0.09 | 2.87  | 0.0421 | 0.12 | 0.0018 | 1923  | 25  | 1872 | 29  | 99  | YES | 1904.9 | 9.1  |
| ZB4-4-73 | 96.9  | 124.2 | 1.28 | 2.08  | 0.0315 | 0.16 | 0.0031 | 2530  | 32  | 2478 | 32  | 99  | YES | 2510.1 | 11.1 |
| ZB4-4-74 | 814   | 134.6 | 0.17 | 2.21  | 0.0340 | 0.16 | 0.0026 | 2412  | 32  | 2474 | 27  | 99  | YES | 2448.1 | 10.4 |
| ZB4-4-75 | 405   | 152   | 0.38 | 2.84  | 0.0444 | 0.11 | 0.0021 | 1942  | 26  | 1861 | 32  | 98  | YES | 1915.0 | 10.0 |
| ZB4-4-76 | 635   | 189.1 | 0.30 | 3.06  | 0.0487 | 0.11 | 0.0019 | 1821  | 25  | 1827 | 30  | 100 | YES | 1827.3 | 9.8  |

|           |       |       |      |       |        |      |        |       |     |      |     |     |     |        |      |
|-----------|-------|-------|------|-------|--------|------|--------|-------|-----|------|-----|-----|-----|--------|------|
| ZB4-4-77  | 100.4 | 76.5  | 0.76 | 3.00  | 0.0541 | 0.11 | 0.0027 | 1854  | 30  | 1857 | 42  | 100 | YES | 1857.2 | 12.1 |
| ZB4-4-78  | 437.5 | 55.2  | 0.13 | 1.71  | 0.0271 | 0.24 | 0.0037 | 2957  | 38  | 3110 | 24  | 97  | YES | 3062.3 | 10.6 |
| ZB4-4-79  | 69.6  | 48    | 0.69 | 2.04  | 0.0345 | 0.17 | 0.0036 | 2569  | 36  | 2538 | 36  | 99  | YES | 2562.0 | 12.6 |
| ZB4-4-80  | 875   | 112.4 | 0.13 | 2.93  | 0.0437 | 0.12 | 0.0019 | 1893  | 24  | 1886 | 30  | 100 | YES | 1892.6 | 9.4  |
| ZB4-4-81  | 166   | 177.3 | 1.07 | 2.10  | 0.0347 | 0.16 | 0.003  | 2511  | 35  | 2490 | 32  | 100 | YES | 2505.7 | 11.4 |
| ZB4-4-82  | 259.8 | 320.8 | 1.23 | 19.42 | 0.3620 | 0.05 | 0.0021 | 323.6 | 5.9 | 216  | 84  | 97  | YES | 323.4  | 2.9  |
| ZB4-4-83  | 246.2 | 240.2 | 0.98 | 21.02 | 0.3843 | 0.05 | 0.0023 | 299.6 | 5.4 | 318  | 92  | 98  | YES | 299.8  | 2.7  |
| ZB4-4-84  | 126   | 45.47 | 0.36 | 2.91  | 0.0490 | 0.12 | 0.0026 | 1904  | 28  | 1871 | 40  | 99  | YES | 1900.9 | 11.4 |
| ZB4-4-85  | 214.2 | 277.9 | 1.30 | 20.70 | 0.3983 | 0.05 | 0.0025 | 304.1 | 5.7 | 252  | 95  | 100 | YES | 304.2  | 2.9  |
| ZB4-4-86  | 64.1  | 47.7  | 0.74 | 3.16  | 0.0589 | 0.11 | 0.003  | 1771  | 29  | 1735 | 51  | 99  | YES | 1770.7 | 12.5 |
| ZB4-4-87  | 495.5 | 107.2 | 0.22 | 2.04  | 0.0395 | 0.16 | 0.0029 | 2568  | 41  | 2499 | 29  | 99  | YES | 2528.6 | 11.9 |
| ZB4-4-88  | 98.7  | 59.7  | 0.60 | 19.84 | 0.4724 | 0.06 | 0.0035 | 316.7 | 7.1 | 340  | 130 | 98  | YES | 317.2  | 3.7  |
| ZB4-4-89  | 632   | 88.7  | 0.14 | 2.89  | 0.0494 | 0.11 | 0.002  | 1911  | 28  | 1849 | 31  | 99  | YES | 1888.0 | 10.4 |
| ZB4-4-90  | 214.4 | 108   | 0.50 | 2.95  | 0.0506 | 0.11 | 0.0021 | 1877  | 28  | 1854 | 34  | 99  | YES | 1873.4 | 10.6 |
| ZB4-4-91  | 570   | 138.4 | 0.24 | 2.91  | 0.0492 | 0.11 | 0.0019 | 1901  | 28  | 1838 | 31  | 98  | YES | 1875.9 | 10.1 |
| ZB4-4-92  | 58.9  | 24.8  | 0.42 | 1.87  | 0.0338 | 0.18 | 0.0042 | 2760  | 41  | 2647 | 39  | 98  | YES | 2710.0 | 13.6 |
| ZB4-4-93  | 314.3 | 166.9 | 0.53 | 2.98  | 0.0470 | 0.11 | 0.0021 | 1864  | 25  | 1831 | 33  | 99  | YES | 1856.7 | 10.1 |
| ZB4-4-94  | 408.3 | 175.8 | 0.43 | 2.89  | 0.0511 | 0.12 | 0.002  | 1911  | 29  | 1919 | 30  | 100 | YES | 1918.5 | 10.6 |
| ZB4-4-95  | 60.6  | 85.2  | 1.41 | 2.02  | 0.0373 | 0.17 | 0.0035 | 2584  | 39  | 2505 | 36  | 98  | YES | 2548.5 | 12.9 |
| ZB4-4-96  | 165   | 79.5  | 0.48 | 2.19  | 0.0432 | 0.15 | 0.0027 | 2419  | 40  | 2287 | 32  | 97  | YES | 2344.5 | 12.1 |
| ZB4-4-97  | 612   | 61    | 0.10 | 2.99  | 0.0490 | 0.12 | 0.0019 | 1860  | 26  | 1882 | 31  | 99  | YES | 1873.1 | 10.0 |
| ZB4-4-98  | 121.9 | 149   | 1.22 | 2.10  | 0.0335 | 0.16 | 0.0033 | 2508  | 33  | 2498 | 34  | 100 | YES | 2508.3 | 11.8 |
| ZB4-4-99  | 601   | 148.9 | 0.25 | 2.98  | 0.0514 | 0.12 | 0.0019 | 1864  | 28  | 1874 | 31  | 100 | YES | 1872.3 | 10.2 |
| ZB4-4-100 | 250.6 | 126.6 | 0.51 | 2.85  | 0.0464 | 0.12 | 0.0023 | 1935  | 27  | 1895 | 36  | 99  | YES | 1926.3 | 10.7 |
| ZB4-4-101 | 302   | 322   | 1.07 | 2.16  | 0.0388 | 0.16 | 0.0027 | 2448  | 36  | 2436 | 29  | 100 | YES | 2446.5 | 11.3 |
| ZB4-4-102 | 80    | 57.2  | 0.72 | 19.31 | 0.4472 | 0.05 | 0.0038 | 325.5 | 7.2 | 50   | 140 | 91  | YES | 325.1  | 3.7  |
| ZB4-4-103 | 681   | 46    | 0.07 | 2.96  | 0.0524 | 0.11 | 0.002  | 1876  | 29  | 1833 | 32  | 99  | YES | 1861.6 | 10.6 |
| ZB4-4-104 | 81.8  | 86    | 1.05 | 2.05  | 0.0341 | 0.17 | 0.0032 | 2557  | 35  | 2505 | 33  | 99  | YES | 2534.1 | 11.8 |
| ZB4-4-105 | 268.2 | 89.9  | 0.34 | 2.89  | 0.0494 | 0.12 | 0.0022 | 1915  | 29  | 1896 | 35  | 100 | YES | 1908.7 | 10.8 |
| ZB4-4-106 | 864   | 63.8  | 0.07 | 3.17  | 0.0501 | 0.11 | 0.0019 | 1767  | 24  | 1836 | 32  | 98  | YES | 1797.8 | 9.8  |

|           |       |       |      |       |        |      |        |       |     |      |     |     |     |        |      |
|-----------|-------|-------|------|-------|--------|------|--------|-------|-----|------|-----|-----|-----|--------|------|
| ZB4-4-107 | 153.6 | 51.1  | 0.33 | 21.37 | 0.5479 | 0.05 | 0.0036 | 294.6 | 7.5 | 220  | 140 | 98  | YES | 294.8  | 3.7  |
| ZB4-4-108 | 168.5 | 144.7 | 0.86 | 19.19 | 0.3684 | 0.05 | 0.0028 | 327.4 | 6.2 | 270  | 110 | 100 | YES | 327.5  | 3.1  |
| ZB4-4-109 | 557   | 52.8  | 0.09 | 2.98  | 0.0516 | 0.12 | 0.0021 | 1862  | 28  | 1896 | 32  | 99  | YES | 1881.9 | 10.8 |
| ZB4-4-110 | 501   | 285   | 0.57 | 2.93  | 0.0463 | 0.11 | 0.002  | 1892  | 26  | 1868 | 31  | 100 | YES | 1886.3 | 9.9  |
