# Supplementary material
Source: publisher figshare collection journal article supplement (https://gsapubs.figshare.com/articles/dataset/_/24470773)
Supplement: Supplementary file 3 [file 1]

Supplementary Table S2. The rare earth element (REE) contents and ratios of zircons selected from the Zibo bauxite-clay deposit in the eastern North China Block

| Spots    | Age  | P    | Ti     | Y    | Nb    | La    | Ce     | Pr   | Nd    | Sm    | Eu    | Gd     | Tb    | Dy     | Ho     | Er     | Tm     | Yb     | Lu     | Hf    | Ta   | Th     | Pb    | U      |
|----------|------|------|--------|------|-------|-------|--------|------|-------|-------|-------|--------|-------|--------|--------|--------|--------|--------|--------|-------|------|--------|-------|--------|
| ZB2-1-1  | 1863 | 142  | 4.28   | 1082 | 4.97  | 0.16  | 44.40  | 0.09 | 1.22  | 1.99  | 1.13  | 14.16  | 5.34  | 74.60  | 32.09  | 184.50 | 43.32  | 446.00 | 107.40 | 10740 | 1.19 | 356.70 | 18.73 | 287.25 |
| ZB2-1-2  | 1831 | 285  | 4.15   | 673  | 1.17  | 0.37  | 15.14  | 0.13 | 1.02  | 1.22  | 0.35  | 8.96   | 3.58  | 49.30  | 20.48  | 112.90 | 26.06  | 256.70 | 59.00  | 10280 | 0.35 | 56.60  | 4.07  | 72.31  |
| ZB2-1-3  | 290  | 265  | 5.80   | 1127 | 1.66  | -     | 15.31  | 0.09 | 1.28  | 3.13  | 0.66  | 19.25  | 6.83  | 87.50  | 36.25  | 191.50 | 40.21  | 375.00 | 81.00  | 8800  | 0.45 | 107.30 | 6.70  | 114.42 |
| ZB2-1-4  | 293  | 393  | 2.04   | 1811 | 9.56  | 0.14  | 28.32  | 0.14 | 2.38  | 4.12  | 0.36  | 30.90  | 11.00 | 154.20 | 59.10  | 303.00 | 61.50  | 564.00 | 114.70 | 11190 | 2.07 | 265.00 | 19.03 | 338.61 |
| ZB2-1-5  | 2521 | 227  | 2.40   | 595  | 1.51  | 0.22  | 21.60  | 0.11 | 1.03  | 1.43  | 0.35  | 9.72   | 3.42  | 46.90  | 18.91  | 101.60 | 22.53  | 218.10 | 49.80  | 9870  | 0.44 | 88.40  | 5.90  | 100.95 |
| ZB2-1-6  | 312  | 401  | 2.47   | 2688 | 16.04 | 0.01  | 42.90  | 0.09 | 2.46  | 7.26  | 0.25  | 54.60  | 19.31 | 247.70 | 94.20  | 443.00 | 86.80  | 734.00 | 146.60 | 10830 | 3.48 | 440.00 | 27.22 | 479.72 |
| ZB2-1-7  | 289  | 301  | 10.50  | 1728 | 5.03  | 0.03  | 82.60  | 0.20 | 3.34  | 7.70  | 3.00  | 37.40  | 11.72 | 154.60 | 56.40  | 281.00 | 60.80  | 566.00 | 120.90 | 8530  | 1.04 | 376.00 | 13.61 | 198.13 |
| ZB2-1-8  | 1986 | 295  | 6.72   | 1159 | 2.66  | 0.16  | 12.38  | 0.11 | 1.64  | 3.04  | 0.84  | 20.50  | 7.08  | 94.40  | 38.29  | 197.70 | 41.90  | 391.90 | 84.50  | 8350  | 0.60 | 64.20  | 5.69  | 105.59 |
| ZB2-1-9  | 287  | 2134 | 5.09   | 999  | 1.75  | 22.50 | 74.90  | 6.80 | 30.40 | 7.24  | 0.87  | 17.79  | 5.88  | 77.10  | 32.33  | 168.90 | 37.82  | 376.60 | 84.60  | 10720 | 0.52 | 88.20  | 5.82  | 105.30 |
| ZB2-1-11 | 287  | 241  | 1.56   | 1479 | 4.49  | -     | 19.80  | 0.08 | 1.40  | 3.57  | 0.42  | 22.00  | 8.82  | 119.80 | 48.50  | 260.00 | 55.20  | 484.00 | 104.50 | 9960  | 0.95 | 72.70  | 6.90  | 124.66 |
| ZB2-1-12 | 1859 | 223  | 4.69   | 1048 | 4.43  | 0.05  | 58.30  | 0.07 | 1.41  | 3.22  | 0.78  | 17.39  | 6.36  | 83.70  | 33.79  | 175.60 | 38.49  | 361.90 | 74.60  | 10630 | 1.13 | 166.70 | 9.10  | 155.29 |
| ZB2-1-13 | 2020 | 234  | 3.85   | 1501 | 8.12  | -     | 65.20  | 0.09 | 1.75  | 3.83  | 1.64  | 23.50  | 8.05  | 109.50 | 46.10  | 248.80 | 57.10  | 581.00 | 135.50 | 10540 | 1.80 | 511.00 | 24.13 | 358.44 |
| ZB2-1-14 | 294  | 283  | 640.00 | 1898 | 6.21  | 0.18  | 14.83  | 0.30 | 3.62  | 9.00  | 1.51  | 42.00  | 13.53 | 167.50 | 61.00  | 298.50 | 60.00  | 549.00 | 112.10 | 7640  | 1.41 | 317.10 | 28.35 | 491.12 |
| ZB2-1-15 | 2526 | 356  | 3.45   | 1596 | 8.35  | 0.01  | 75.00  | 0.06 | 1.33  | 3.29  | 0.91  | 22.00  | 8.68  | 121.30 | 52.10  | 274.20 | 60.10  | 573.00 | 123.30 | 10630 | 1.37 | 112.70 | 7.29  | 128.30 |
| ZB2-1-17 | 1859 | 320  | 6.60   | 2750 | 1.69  | 0.29  | 11.30  | 0.58 | 8.20  | 14.30 | 2.95  | 72.60  | 21.91 | 263.70 | 96.50  | 452.00 | 86.10  | 743.00 | 150.10 | 7590  | 0.42 | 95.60  | 6.20  | 108.04 |
| ZB2-1-18 | 308  | 209  | 9.23   | 606  | 0.82  | -     | 11.30  | 0.05 | 1.34  | 2.32  | 0.82  | 12.69  | 4.19  | 51.30  | 19.52  | 98.10  | 20.71  | 196.30 | 41.92  | 8670  | 0.25 | 44.16  | 3.19  | 58.14  |
| ZB2-1-19 | 1897 | 256  | 6.48   | 983  | 2.53  | -     | 60.30  | 0.10 | 1.67  | 3.59  | 1.08  | 18.50  | 6.28  | 78.80  | 31.56  | 159.50 | 34.15  | 319.40 | 66.00  | 9390  | 0.76 | 129.80 | 6.49  | 105.74 |
| ZB2-1-20 | 317  | 588  | 7.75   | 3510 | 2.91  | 0.24  | 105.60 | 1.98 | 26.50 | 31.90 | 11.79 | 116.00 | 32.10 | 342.00 | 119.90 | 544.00 | 106.80 | 939.00 | 189.70 | 8280  | 0.45 | 266.00 | 8.38  | 103.36 |
| ZB2-1-21 | 2523 | 470  | 3.94   | 1524 | 4.99  | 0.27  | 63.80  | 0.17 | 1.52  | 4.09  | 0.93  | 24.50  | 9.45  | 123.10 | 49.10  | 246.10 | 51.40  | 478.00 | 100.80 | 11160 | 0.94 | 194.30 | 9.67  | 144.80 |
| ZB2-1-23 | 281  | 363  | 4.64   | 1486 | 2.43  | 0.01  | 40.20  | 0.12 | 2.37  | 4.77  | 1.67  | 29.00  | 9.50  | 123.70 | 48.50  | 247.80 | 51.40  | 475.00 | 99.70  | 10230 | 0.53 | 71.10  | 3.98  | 64.57  |
| ZB2-1-24 | 2507 | 307  | 7.90   | 2381 | 3.23  | 0.16  | 21.70  | 0.38 | 6.27  | 10.40 | 2.21  | 48.80  | 16.84 | 212.00 | 81.10  | 387.00 | 76.40  | 676.00 | 139.50 | 7400  | 0.56 | 145.10 | 7.88  | 132.73 |
| ZB2-1-25 | 293  | 410  | 7.49   | 2119 | 3.42  | -     | 40.40  | 0.09 | 1.61  | 4.32  | 1.20  | 29.00  | 11.47 | 157.80 | 65.40  | 351.00 | 77.50  | 751.00 | 164.00 | 9130  | 0.74 | 152.70 | 8.84  | 149.28 |
| ZB2-1-26 | 2504 | 234  | 3.30   | 1427 | 3.15  | 0.00  | 14.18  | 0.10 | 1.77  | 3.59  | 0.62  | 24.00  | 8.62  | 118.70 | 46.30  | 243.70 | 52.00  | 476.00 | 100.20 | 8930  | 0.62 | 62.90  | 5.73  | 107.11 |
| ZB2-1-27 | 288  | 277  | 2.52   | 1739 | 1.82  | 0.01  | 26.00  | 0.13 | 2.30  | 5.66  | 0.64  | 37.20  | 12.15 | 154.40 | 60.50  | 287.00 | 57.90  | 513.00 | 103.30 | 10610 | 0.46 | 82.40  | 5.77  | 103.11 |
| ZB2-1-28 | 292  | 243  | 2.75   | 1317 | 2.98  | 0.02  | 55.40  | 0.09 | 1.76  | 3.99  | 0.81  | 23.90  | 8.36  | 108.80 | 42.30  | 221.00 | 45.60  | 422.00 | 87.00  | 11120 | 0.61 | 87.70  | 4.81  | 73.55  |
| ZB2-1-30 | 1905 | 699  | 2.11   | 2871 | 11.18 | 0.12  | 35.20  | 0.18 | 2.95  | 8.63  | 0.33  | 56.10  | 20.02 | 264.20 | 96.30  | 473.00 | 92.50  | 800.00 | 157.90 | 10190 | 2.01 | 343.00 | 21.76 | 376.07 |

|          |      |      |       |      |       |       |        |       |        |       |       |        |       |        |        |        |        |         |        |       |      |        |        |        |
|----------|------|------|-------|------|-------|-------|--------|-------|--------|-------|-------|--------|-------|--------|--------|--------|--------|---------|--------|-------|------|--------|--------|--------|
| ZB2-1-31 | 1860 | 339  | 11.40 | 1529 | 1.33  | 0.03  | 16.12  | 0.12  | 2.00   | 4.29  | 1.76  | 27.70  | 9.22  | 124.20 | 49.40  | 248.40 | 52.40  | 493.00  | 103.80 | 7600  | 0.26 | 77.20  | 4.13   | 71.28  |
| ZB2-1-33 | 2544 | 2230 | 3.72  | 2077 | 3.11  | 60.20 | 173.00 | 23.00 | 113.00 | 29.70 | 1.71  | 64.40  | 18.00 | 195.40 | 72.00  | 340.00 | 66.00  | 569.00  | 110.30 | 9630  | 0.85 | 93.90  | 6.84   | 129.25 |
| ZB2-1-34 | 1989 | 262  | 2.17  | 1052 | 5.03  | 0.02  | 23.20  | 0.05  | 0.78   | 1.95  | 0.16  | 16.40  | 6.14  | 83.10  | 34.80  | 177.30 | 41.30  | 348.00  | 74.60  | 12190 | 1.18 | 82.50  | 7.07   | 131.11 |
| ZB2-1-36 | 385  | 191  | 7.70  | 590  | 0.92  | -     | 13.87  | 0.04  | 0.97   | 1.85  | 0.50  | 10.84  | 3.72  | 47.50  | 19.21  | 95.10  | 21.45  | 201.20  | 43.40  | 9450  | 0.38 | 40.80  | 3.09   | 57.55  |
| ZB2-1-37 | 2107 | 260  | 4.06  | 1201 | 3.66  | -     | 53.10  | 0.24  | 4.05   | 7.07  | 1.39  | 31.70  | 9.09  | 107.20 | 38.80  | 182.60 | 37.80  | 343.00  | 71.70  | 12000 | 1.60 | 252.40 | 140.48 | 209.25 |
| ZB2-1-38 | 1870 | 331  | 6.72  | 1465 | 4.30  | -     | 58.80  | 0.06  | 1.26   | 3.14  | 1.01  | 20.10  | 7.40  | 107.80 | 47.20  | 256.70 | 56.60  | 559.00  | 121.60 | 9050  | 0.74 | 97.20  | 5.26   | 90.69  |
| ZB2-1-39 | 2562 | 144  | 5.26  | 680  | 1.93  | -     | 26.84  | 0.05  | 1.08   | 2.68  | 0.63  | 14.04  | 4.49  | 54.20  | 20.83  | 110.20 | 23.80  | 233.50  | 50.00  | 10340 | 0.66 | 160.90 | 12.25  | 157.55 |
| ZB2-1-40 | 1972 | 302  | 2.87  | 2940 | 12.38 | -     | 71.50  | 0.28  | 5.14   | 13.62 | 0.20  | 83.50  | 25.87 | 316.00 | 108.30 | 470.00 | 86.20  | 688.00  | 127.60 | 7200  | 1.76 | 307.00 | 14.71  | 233.19 |
| ZB2-1-41 | 283  | 310  | 9.33  | 877  | 2.13  | 0.23  | 37.60  | 0.13  | 1.94   | 2.94  | 0.76  | 17.10  | 5.52  | 73.00  | 27.86  | 141.60 | 31.00  | 295.70  | 63.40  | 9440  | 0.43 | 105.90 | 5.35   | 80.02  |
| ZB2-1-42 | 292  | 508  | 4.85  | 1690 | 6.51  | -     | 71.20  | 0.08  | 1.78   | 4.10  | 1.22  | 30.20  | 10.58 | 139.90 | 54.50  | 284.50 | 62.40  | 563.00  | 115.10 | 10890 | 1.18 | 246.20 | 10.92  | 164.49 |
| ZB2-1-43 | 2587 | 580  | 12.40 | 2676 | 2.68  | 0.02  | 79.40  | 0.29  | 4.61   | 9.70  | 5.34  | 58.50  | 19.19 | 237.60 | 87.70  | 430.00 | 86.90  | 778.00  | 161.40 | 7380  | 0.40 | 163.10 | 5.99   | 81.27  |
| ZB2-1-44 | 2676 | 268  | 8.30  | 1478 | 3.52  | 0.04  | 14.11  | 0.08  | 1.63   | 3.50  | 0.71  | 23.20  | 8.50  | 118.00 | 48.90  | 238.00 | 53.00  | 468.00  | 97.80  | 8540  | 0.67 | 60.10  | 5.17   | 96.97  |
| ZB2-1-45 | 304  | 420  | 5.83  | 1842 | 4.86  | -     | 94.70  | 0.16  | 2.87   | 6.53  | 2.52  | 38.00  | 13.08 | 157.20 | 61.00  | 302.30 | 63.10  | 567.00  | 118.40 | 9300  | 0.84 | 198.80 | 8.48   | 129.40 |
| ZB2-1-46 | 2502 | 250  | 4.14  | 1518 | 5.91  | -     | 18.16  | 0.13  | 2.06   | 4.12  | 0.59  | 27.70  | 10.03 | 125.40 | 50.70  | 256.60 | 54.50  | 483.00  | 101.60 | 9040  | 1.16 | 130.60 | 11.15  | 204.16 |
| ZB2-1-47 | 1871 | 327  | 9.62  | 1147 | 1.85  | 0.00  | 27.44  | 0.09  | 1.66   | 2.65  | 1.59  | 17.60  | 6.30  | 85.40  | 35.80  | 190.80 | 42.60  | 408.00  | 94.10  | 7960  | 0.34 | 64.40  | 3.70   | 58.51  |
| ZB2-1-48 | 1962 | 786  | 9.60  | 4940 | 3.73  | 0.20  | 135.00 | 1.29  | 21.60  | 36.00 | 13.50 | 135.80 | 40.00 | 468.00 | 157.80 | 745.00 | 155.50 | 1358.00 | 272.00 | 7250  | 0.54 | 331.00 | 10.97  | 157.98 |
| ZB2-1-50 | 293  | 302  | 3.62  | 967  | 1.85  | 0.04  | 17.88  | 0.06  | 0.52   | 1.83  | 0.39  | 12.00  | 4.83  | 68.10  | 29.97  | 165.20 | 37.65  | 385.30  | 84.40  | 10990 | 0.53 | 55.50  | 4.63   | 87.24  |
| ZB2-1-52 | 316  | 400  | 4.98  | 1179 | 1.53  | 0.01  | 16.60  | 0.07  | 1.12   | 3.04  | 0.50  | 17.10  | 6.67  | 90.90  | 39.10  | 208.00 | 46.10  | 459.00  | 101.50 | 10510 | 0.46 | 58.50  | 4.66   | 86.37  |
| ZB2-1-53 | 291  | 386  | 5.49  | 1416 | 3.06  | -     | 26.90  | 0.04  | 1.09   | 3.23  | 0.72  | 19.60  | 7.74  | 108.10 | 44.40  | 236.80 | 55.00  | 532.00  | 117.90 | 9720  | 0.74 | 150.40 | 8.79   | 152.55 |
| ZB2-1-54 | 292  | 212  | 5.70  | 618  | 1.49  | -     | 43.50  | 0.10  | 1.86   | 2.80  | 1.64  | 15.08  | 4.38  | 53.00  | 20.30  | 100.20 | 22.34  | 207.80  | 46.30  | 8300  | 0.47 | 99.70  | 6.61   | 96.30  |
| ZB2-1-55 | 1931 | 413  | 9.37  | 1784 | 1.78  | -     | 8.99   | 0.07  | 1.68   | 4.84  | 0.69  | 31.00  | 11.25 | 154.00 | 60.80  | 301.00 | 60.60  | 538.00  | 110.30 | 8920  | 0.54 | 150.00 | 13.12  | 239.47 |
| ZB2-1-56 | 297  | 601  | 15.70 | 1369 | 1.05  | 0.03  | 3.49   | 0.38  | 6.48   | 10.08 | 0.47  | 40.90  | 12.42 | 139.80 | 47.10  | 209.50 | 39.70  | 345.00  | 65.70  | 10220 | 0.36 | 101.80 | 78.70  | 192.01 |
| ZB2-1-57 | 2531 | 129  | 3.74  | 734  | 3.30  | -     | 53.20  | 0.05  | 0.95   | 1.29  | 0.58  | 9.07   | 3.15  | 45.10  | 20.71  | 120.00 | 30.32  | 333.00  | 80.00  | 10800 | 0.80 | 160.30 | 9.75   | 167.03 |
| ZB2-1-58 | 1950 | 274  | 8.01  | 1032 | 0.87  | 0.02  | 22.91  | 0.20  | 3.35   | 4.87  | 2.45  | 22.90  | 7.24  | 92.40  | 34.70  | 169.80 | 35.70  | 340.00  | 73.80  | 7520  | 0.20 | 53.40  | 2.52   | 37.89  |
| ZB2-1-59 | 2503 | 407  | 3.82  | 2691 | 6.49  | 0.12  | 38.20  | 0.25  | 4.22   | 10.58 | 1.49  | 58.80  | 19.49 | 254.00 | 95.60  | 455.00 | 91.00  | 794.00  | 157.50 | 8830  | 1.39 | 300.00 | 17.33  | 292.27 |
| ZB2-1-60 | 292  | 228  | 4.65  | 710  | 1.40  | 0.02  | 13.65  | 0.03  | 0.40   | 1.44  | 0.30  | 9.03   | 3.49  | 51.40  | 22.13  | 125.50 | 29.60  | 299.70  | 68.30  | 10470 | 0.43 | 41.00  | 3.46   | 66.52  |
| ZB2-1-61 | 299  | 267  | 14.70 | 1197 | 1.25  | 0.02  | 31.50  | 0.18  | 2.82   | 4.92  | 2.92  | 25.90  | 8.55  | 102.10 | 39.00  | 193.10 | 39.60  | 373.00  | 77.20  | 6540  | 0.26 | 70.60  | 3.41   | 53.41  |
| ZB2-1-62 | 2570 | 223  | 13.10 | 718  | 1.35  | -     | 32.90  | 0.08  | 1.57   | 3.11  | 1.17  | 15.78  | 5.12  | 63.50  | 23.70  | 116.20 | 24.11  | 227.00  | 47.60  | 8290  | 0.45 | 44.70  | 2.31   | 38.74  |
| ZB2-1-63 | 293  | 249  | 2.26  | 2119 | 4.12  | -     | 20.54  | 0.26  | 4.61   | 8.39  | 0.96  | 44.60  | 14.83 | 190.90 | 72.40  | 354.00 | 73.00  | 654.00  | 132.00 | 9710  | 0.92 | 106.70 | 8.44   | 157.00 |
| ZB2-1-64 | 2567 | 527  | 3.85  | 1913 | 1.82  | 3.43  | 25.20  | 1.22  | 8.80   | 7.69  | 1.98  | 42.20  | 13.07 | 164.50 | 63.70  | 314.00 | 65.00  | 594.00  | 123.00 | 7690  | 0.32 | 87.70  | 5.96   | 101.48 |

|          |      |      |       |      |       |       |        |       |        |       |      |       |       |        |        |        |        |         |        |       |      |        |       |        |
|----------|------|------|-------|------|-------|-------|--------|-------|--------|-------|------|-------|-------|--------|--------|--------|--------|---------|--------|-------|------|--------|-------|--------|
| ZB2-1-65 | 300  | 647  | 5.96  | 2506 | 5.76  | 0.00  | 71.90  | 0.17  | 3.58   | 8.07  | 2.05 | 44.50 | 15.89 | 206.50 | 81.70  | 411.00 | 87.80  | 800.00  | 165.40 | 10230 | 0.97 | 141.10 | 7.37  | 121.60 |
| ZB2-1-66 | 322  | 96   | 1.75  | 1599 | 9.98  | 0.02  | 54.90  | 0.03  | 0.58   | 1.94  | 0.90 | 13.45 | 5.42  | 80.40  | 40.30  | 260.10 | 70.50  | 805.00  | 194.20 | 12090 | 0.82 | 205.00 | 24.63 | 363.37 |
| ZB2-1-67 | 305  | 441  | 2.75  | 2159 | 9.64  | 0.01  | 58.50  | 0.14  | 2.94   | 7.17  | 0.63 | 42.40 | 14.93 | 192.20 | 73.10  | 358.00 | 73.90  | 655.00  | 128.30 | 10630 | 1.68 | 442.00 | 20.74 | 338.39 |
| ZB2-1-68 | 297  | 487  | 8.70  | 2750 | 5.13  | 0.11  | 110.50 | 0.82  | 13.20  | 17.40 | 6.81 | 75.40 | 22.50 | 262.00 | 97.00  | 443.00 | 94.60  | 836.00  | 171.50 | 9250  | 0.79 | 424.00 | 14.10 | 166.52 |
| ZB2-1-69 | 300  | 302  | 8.26  | 1143 | 2.44  | 0.01  | 50.80  | 0.11  | 2.11   | 4.32  | 1.14 | 23.30 | 7.86  | 95.90  | 37.50  | 190.60 | 39.60  | 382.00  | 79.70  | 8730  | 0.65 | 95.40  | 5.03  | 81.88  |
| ZB2-1-70 | 402  | 501  | 13.90 | 1823 | 2.34  | 0.00  | 29.89  | 0.12  | 2.70   | 5.95  | 2.74 | 38.30 | 12.74 | 160.40 | 61.10  | 291.50 | 61.90  | 553.00  | 114.70 | 8670  | 0.70 | 116.90 | 7.04  | 120.25 |
| ZB2-1-71 | 2535 | 407  | 4.89  | 2233 | 2.12  | 0.04  | 38.30  | 0.40  | 6.04   | 10.26 | 2.52 | 49.50 | 15.89 | 191.70 | 75.20  | 354.00 | 76.40  | 713.00  | 141.60 | 7930  | 0.46 | 141.50 | 7.46  | 120.79 |
| ZB2-1-72 | 291  | 111  | 8.60  | 228  | 1.22  | -     | 5.12   | 0.02  | 0.52   | 0.91  | 0.08 | 4.41  | 1.59  | 18.60  | 7.60   | 37.90  | 8.06   | 76.90   | 15.81  | 10170 | 0.58 | 39.90  | 51.40 | 140.54 |
| ZB2-1-73 | 1901 | 219  | 7.17  | 824  | 2.28  | 0.00  | 54.00  | 0.08  | 1.76   | 2.95  | 0.98 | 16.82 | 5.63  | 70.20  | 26.72  | 134.50 | 28.99  | 274.60  | 57.00  | 8950  | 0.61 | 132.80 | 5.73  | 83.82  |
| ZB2-1-74 | 307  | 290  | 4.71  | 979  | 1.66  | -     | 18.17  | 0.05  | 0.97   | 2.40  | 0.50 | 13.10 | 5.29  | 71.50  | 30.33  | 169.20 | 38.50  | 390.00  | 85.30  | 10150 | 0.49 | 69.50  | 5.14  | 94.17  |
| ZB2-1-75 | 286  | 312  | 5.42  | 1915 | 6.28  | 0.20  | 26.92  | 0.22  | 3.61   | 5.97  | 0.65 | 41.10 | 13.96 | 181.50 | 68.60  | 312.20 | 61.30  | 546.00  | 104.30 | 8030  | 1.12 | 186.80 | 11.13 | 189.31 |
| ZB2-1-77 | 292  | 295  | 10.15 | 1235 | 1.73  | 0.00  | 14.47  | 0.12  | 1.75   | 3.55  | 1.08 | 20.10 | 7.19  | 96.60  | 40.10  | 213.80 | 45.70  | 454.00  | 97.30  | 7660  | 0.40 | 58.50  | 4.51  | 85.54  |
| ZB2-1-78 | 1892 | 250  | 13.50 | 1318 | 2.10  | 0.01  | 41.00  | 0.14  | 2.81   | 4.54  | 2.43 | 25.60 | 8.30  | 107.40 | 41.80  | 219.80 | 46.10  | 421.00  | 89.30  | 6910  | 0.42 | 75.50  | 4.03  | 66.31  |
| ZB2-1-79 | 374  | 323  | 2.62  | 1726 | 5.09  | 1.28  | 47.80  | 0.52  | 3.76   | 5.16  | 0.77 | 31.00 | 11.69 | 150.80 | 59.40  | 282.80 | 58.90  | 545.00  | 109.10 | 9770  | 0.93 | 194.00 | 10.97 | 187.22 |
| ZB2-1-80 | 1894 | 482  | 3.62  | 1950 | 6.25  | 0.03  | 69.60  | 0.10  | 1.74   | 5.00  | 1.13 | 32.30 | 10.90 | 154.00 | 62.80  | 328.00 | 70.20  | 677.00  | 136.10 | 9820  | 1.08 | 130.10 | 7.43  | 132.25 |
| ZB2-1-81 | 297  | 372  | 20.70 | 1636 | 1.96  | 0.06  | 43.50  | 0.34  | 4.63   | 8.74  | 4.86 | 41.20 | 12.86 | 152.00 | 56.40  | 259.60 | 51.30  | 444.00  | 92.10  | 6590  | 0.42 | 96.80  | 4.28  | 65.38  |
| ZB2-1-82 | 2897 | 264  | 2.12  | 641  | 0.97  | 0.00  | 5.87   | 0.03  | 0.25   | 1.34  | 0.23 | 7.30  | 3.37  | 45.70  | 20.10  | 115.30 | 25.80  | 264.00  | 58.00  | 10740 | 0.31 | 37.10  | 5.88  | 110.45 |
| ZB2-1-83 | 317  | 509  | 4.57  | 2089 | 4.45  | 0.18  | 36.00  | 0.19  | 3.20   | 6.41  | 1.71 | 38.40 | 13.78 | 179.70 | 72.30  | 347.00 | 75.20  | 687.00  | 139.40 | 8970  | 0.79 | 121.90 | 7.75  | 132.59 |
| ZB2-1-84 | 2547 | 737  | 12.00 | 3700 | 4.24  | 0.10  | 130.80 | 0.59  | 8.98   | 15.30 | 6.63 | 85.70 | 27.00 | 336.00 | 125.30 | 599.00 | 118.20 | 1057.00 | 210.80 | 8180  | 0.62 | 282.60 | 9.92  | 132.81 |
| ZB2-1-85 | 288  | 841  | 1.50  | 3090 | 17.27 | 0.04  | 39.30  | 0.14  | 2.88   | 7.14  | 0.16 | 61.50 | 22.08 | 295.00 | 112.40 | 523.00 | 106.60 | 905.00  | 177.20 | 10130 | 2.68 | 334.00 | 25.91 | 467.31 |
| ZB2-1-86 | 2530 | 2530 | 2.40  | 1736 | 5.24  | 34.30 | 132.00 | 11.80 | 55.80  | 14.90 | 1.24 | 43.60 | 12.47 | 152.20 | 59.60  | 289.20 | 60.70  | 546.00  | 109.40 | 9510  | 0.92 | 303.00 | 14.40 | 230.14 |
| ZB2-1-87 | 2528 | 1771 | 7.56  | 1784 | 3.95  | 71.20 | 262.00 | 24.20 | 113.00 | 26.30 | 3.60 | 53.50 | 14.57 | 160.90 | 59.90  | 289.00 | 58.70  | 515.00  | 99.00  | 9280  | 0.89 | 144.70 | 6.99  | 108.53 |
| ZB2-1-88 | 285  | 311  | 2.31  | 1571 | 7.15  | -     | 38.90  | 0.07  | 1.60   | 4.44  | 0.23 | 28.90 | 10.29 | 138.50 | 54.50  | 268.00 | 57.10  | 502.00  | 103.60 | 11200 | 1.43 | 116.90 | 10.08 | 192.13 |
| ZB2-1-90 | 1879 | 584  | 4.60  | 1820 | 8.59  | 0.94  | 64.40  | 0.54  | 2.58   | 4.61  | 1.04 | 27.40 | 9.84  | 137.00 | 57.70  | 313.00 | 69.40  | 683.00  | 138.40 | 9330  | 1.52 | 115.60 | 6.86  | 128.02 |
| ZB2-1-91 | 1910 | 323  | 6.30  | 2360 | 4.70  | 0.14  | 25.50  | 0.34  | 5.50   | 10.80 | 1.42 | 60.60 | 20.14 | 234.40 | 85.10  | 390.00 | 73.40  | 622.00  | 117.40 | 7540  | 0.92 | 191.90 | 10.88 | 177.60 |
| ZB2-1-92 | 296  | 301  | 4.11  | 1275 | 3.24  | -     | 19.77  | 0.10  | 1.82   | 4.02  | 0.60 | 26.30 | 9.39  | 116.10 | 43.70  | 208.30 | 42.30  | 387.00  | 76.40  | 8750  | 0.72 | 201.00 | 10.01 | 166.26 |
| ZB2-1-93 | 302  | 284  | 5.33  | 814  | 1.51  | -     | 16.56  | 0.04  | 0.92   | 1.49  | 0.43 | 11.20 | 4.26  | 61.00  | 25.85  | 137.10 | 32.30  | 330.00  | 73.40  | 10370 | 0.48 | 70.60  | 5.26  | 98.25  |
| ZB2-1-94 | 310  | 229  | 8.03  | 990  | 2.07  | -     | 15.90  | 0.07  | 1.26   | 2.73  | 0.75 | 15.82 | 5.61  | 77.60  | 32.00  | 173.00 | 38.40  | 366.00  | 77.60  | 8560  | 0.46 | 44.60  | 3.69  | 69.49  |
| ZB2-1-95 | 294  | 357  | 8.65  | 1672 | 2.03  | 0.02  | 20.77  | 0.20  | 3.23   | 5.93  | 2.19 | 32.20 | 10.97 | 140.90 | 55.50  | 280.00 | 59.60  | 564.00  | 115.30 | 7830  | 0.31 | 105.00 | 5.76  | 100.30 |
| ZB2-1-97 | 1923 | 388  | 2.53  | 1419 | 5.19  | 0.05  | 34.30  | 0.11  | 1.85   | 4.78  | 0.41 | 25.30 | 9.43  | 120.20 | 47.70  | 239.00 | 50.00  | 464.00  | 91.90  | 9710  | 0.99 | 132.50 | 9.37  | 168.65 |

|           |      |      |        |      |       |       |        |      |       |      |      |       |       |        |       |        |       |        |        |       |      |        |       |        |
|-----------|------|------|--------|------|-------|-------|--------|------|-------|------|------|-------|-------|--------|-------|--------|-------|--------|--------|-------|------|--------|-------|--------|
| ZB2-1-98  | 364  | 487  | 8.20   | 2585 | 5.08  | 0.01  | 99.00  | 0.32 | 4.75  | 9.78 | 4.01 | 54.90 | 18.35 | 227.20 | 86.10 | 423.00 | 87.20 | 792.00 | 157.40 | 8990  | 0.86 | 226.40 | 8.88  | 130.83 |
| ZB2-1-99  | 2497 | 272  | 9.81   | 862  | 0.51  | -     | 3.58   | 0.03 | 0.80  | 2.26 | 0.40 | 15.50 | 5.61  | 72.00  | 29.40 | 145.80 | 30.20 | 277.00 | 56.80  | 9140  | 0.27 | 25.84  | 3.73  | 75.57  |
| ZB2-1-100 | 2620 | 204  | 7.81   | 905  | 1.97  | -     | 51.70  | 0.10 | 1.98  | 3.28 | 1.33 | 17.40 | 6.05  | 76.10  | 29.60 | 144.10 | 31.20 | 295.00 | 60.00  | 8950  | 0.58 | 101.30 | 4.97  | 83.96  |
| ZB2-1-101 | 2517 | 682  | 5.59   | 2050 | 2.19  | 0.04  | 59.80  | 0.27 | 5.11  | 7.95 | 2.77 | 44.50 | 14.61 | 177.60 | 68.00 | 330.00 | 72.30 | 653.00 | 128.60 | 9520  | 0.44 | 122.80 | 5.81  | 91.85  |
| ZB2-1-102 | 292  | 177  | 9.06   | 600  | 0.65  | 0.02  | 22.33  | 0.22 | 3.55  | 5.90 | 1.36 | 22.20 | 5.77  | 59.50  | 19.83 | 89.70  | 17.06 | 157.60 | 30.93  | 9620  | 0.24 | 62.70  | 38.59 | 57.65  |
| ZB2-1-103 | 1871 | 345  | 28.70  | 887  | 0.42  | 0.01  | 2.46   | 0.08 | 1.60  | 2.56 | 1.65 | 14.88 | 5.12  | 71.20  | 29.80 | 153.40 | 30.60 | 288.00 | 61.90  | 5680  | 0.11 | 17.30  | 1.41  | 27.93  |
| ZB2-1-104 | 1875 | 247  | 2.66   | 1253 | 4.92  | 0.09  | 23.20  | 0.10 | 1.27  | 3.38 | 0.48 | 20.10 | 8.16  | 102.70 | 45.40 | 204.00 | 46.90 | 428.00 | 85.20  | 9650  | 1.31 | 105.60 | 8.89  | 171.41 |
| ZB2-1-105 | 1886 | 252  | 6.50   | 905  | 1.89  | -     | 9.74   | 0.04 | 1.20  | 2.57 | 0.39 | 16.50 | 6.05  | 78.00  | 31.50 | 162.10 | 34.00 | 312.00 | 62.90  | 8130  | 0.58 | 22.30  | 2.49  | 50.55  |
| ZB2-1-106 | 389  | 366  | 4.12   | 1043 | 1.88  | -     | 17.53  | 0.04 | 0.78  | 1.91 | 0.41 | 13.26 | 5.62  | 77.30  | 32.80 | 179.40 | 41.60 | 420.00 | 94.70  | 10530 | 0.59 | 55.90  | 4.72  | 89.87  |
| ZB2-1-107 | 1892 | 421  | 9.30   | 1521 | 3.67  | 0.02  | 53.30  | 0.14 | 2.35  | 5.31 | 2.05 | 29.20 | 10.18 | 127.70 | 49.70 | 253.20 | 54.20 | 489.00 | 102.50 | 8490  | 0.59 | 160.70 | 6.81  | 105.28 |
| ZB2-1-108 | 377  | 254  | 5.00   | 1449 | 2.82  | -     | 15.77  | 0.10 | 1.88  | 4.79 | 0.73 | 30.00 | 9.87  | 129.90 | 49.40 | 242.20 | 45.50 | 396.00 | 78.30  | 9160  | 0.80 | 141.90 | 8.68  | 145.97 |
| ZB2-1-109 | 297  | 314  | 4.36   | 1796 | 4.68  | -     | 31.10  | 0.12 | 2.62  | 5.32 | 1.05 | 31.30 | 10.86 | 147.50 | 60.90 | 309.90 | 68.00 | 631.00 | 125.20 | 8650  | 0.79 | 85.90  | 6.51  | 120.55 |
| ZB2-1-110 | 296  | 204  | 3.99   | 1346 | 0.61  | 0.02  | 8.15   | 0.28 | 4.40  | 6.50 | 2.46 | 33.00 | 10.45 | 124.30 | 46.60 | 218.40 | 44.10 | 397.00 | 80.20  | 7070  | 0.15 | 35.00  | 2.33  | 42.00  |
| ZB2-2-1   | 303  | 142  | 4.28   | 1082 | 4.97  | 0.16  | 44.40  | 0.09 | 1.22  | 1.99 | 1.13 | 14.16 | 5.34  | 74.60  | 32.09 | 184.50 | 43.32 | 446.00 | 107.40 | 10740 | 1.19 | 356.70 | 18.73 | 287.25 |
| ZB2-2-2   | 291  | 285  | 4.15   | 673  | 1.17  | 0.37  | 15.14  | 0.13 | 1.02  | 1.22 | 0.35 | 8.96  | 3.58  | 49.30  | 20.48 | 112.90 | 26.06 | 256.70 | 59.00  | 10280 | 0.35 | 56.60  | 4.07  | 72.31  |
| ZB2-2-3   | 290  | 265  | 5.80   | 1127 | 1.66  | -     | 15.31  | 0.09 | 1.28  | 3.13 | 0.66 | 19.25 | 6.83  | 87.50  | 36.25 | 191.50 | 40.21 | 375.00 | 81.00  | 8800  | 0.45 | 107.30 | 6.70  | 114.42 |
| ZB2-2-4   | 286  | 393  | 2.04   | 1811 | 9.56  | 0.14  | 28.32  | 0.14 | 2.38  | 4.12 | 0.36 | 30.90 | 11.00 | 154.20 | 59.10 | 303.00 | 61.50 | 564.00 | 114.70 | 11190 | 2.07 | 265.00 | 19.03 | 338.61 |
| ZB2-2-5   | 297  | 227  | 2.40   | 595  | 1.51  | 0.22  | 21.60  | 0.11 | 1.03  | 1.43 | 0.35 | 9.72  | 3.42  | 46.90  | 18.91 | 101.60 | 22.53 | 218.10 | 49.80  | 9870  | 0.44 | 88.40  | 5.90  | 100.95 |
| ZB2-2-6   | 290  | 401  | 2.47   | 2688 | 16.04 | 0.01  | 42.90  | 0.09 | 2.46  | 7.26 | 0.25 | 54.60 | 19.31 | 247.70 | 94.20 | 443.00 | 86.80 | 734.00 | 146.60 | 10830 | 3.48 | 440.00 | 27.22 | 479.72 |
| ZB2-2-7   | 288  | 301  | 10.50  | 1728 | 5.03  | 0.03  | 82.60  | 0.20 | 3.34  | 7.70 | 3.00 | 37.40 | 11.72 | 154.60 | 56.40 | 281.00 | 60.80 | 566.00 | 120.90 | 8530  | 1.04 | 376.00 | 13.61 | 198.13 |
| ZB2-2-8   | 286  | 295  | 6.72   | 1159 | 2.66  | 0.16  | 12.38  | 0.11 | 1.64  | 3.04 | 0.84 | 20.50 | 7.08  | 94.40  | 38.29 | 197.70 | 41.90 | 391.90 | 84.50  | 8350  | 0.60 | 64.20  | 5.69  | 105.59 |
| ZB2-2-9   | 284  | 2134 | 5.09   | 999  | 1.75  | 22.50 | 74.90  | 6.80 | 30.40 | 7.24 | 0.87 | 17.79 | 5.88  | 77.10  | 32.33 | 168.90 | 37.82 | 376.60 | 84.60  | 10720 | 0.52 | 88.20  | 5.82  | 105.30 |
| ZB2-2-10  | 289  | 278  | 10.90  | 1129 | 2.60  | 0.04  | 43.30  | 0.16 | 2.30  | 3.55 | 1.37 | 23.20 | 7.13  | 92.20  | 36.70 | 183.40 | 38.50 | 371.00 | 79.70  | 8920  | 0.53 | 91.60  | 4.45  | 71.33  |
| ZB2-2-11  | 296  | 241  | 1.56   | 1479 | 4.49  | -     | 19.80  | 0.08 | 1.40  | 3.57 | 0.42 | 22.00 | 8.82  | 119.80 | 48.50 | 260.00 | 55.20 | 484.00 | 104.50 | 9960  | 0.95 | 72.70  | 6.90  | 124.66 |
| ZB2-2-12  | 285  | 223  | 4.69   | 1048 | 4.43  | 0.05  | 58.30  | 0.07 | 1.41  | 3.22 | 0.78 | 17.39 | 6.36  | 83.70  | 33.79 | 175.60 | 38.49 | 361.90 | 74.60  | 10630 | 1.13 | 166.70 | 9.10  | 155.29 |
| ZB2-2-13  | 300  | 234  | 3.85   | 1501 | 8.12  | -     | 65.20  | 0.09 | 1.75  | 3.83 | 1.64 | 23.50 | 8.05  | 109.50 | 46.10 | 248.80 | 57.10 | 581.00 | 135.50 | 10540 | 1.80 | 511.00 | 24.13 | 358.44 |
| ZB2-2-14  | 299  | 283  | 640.00 | 1898 | 6.21  | 0.18  | 14.83  | 0.30 | 3.62  | 9.00 | 1.51 | 42.00 | 13.53 | 167.50 | 61.00 | 298.50 | 60.00 | 549.00 | 112.10 | 7640  | 1.41 | 317.10 | 28.35 | 491.12 |
| ZB2-2-15  | 289  | 356  | 3.45   | 1596 | 8.35  | 0.01  | 75.00  | 0.06 | 1.33  | 3.29 | 0.91 | 22.00 | 8.68  | 121.30 | 52.10 | 274.20 | 60.10 | 573.00 | 123.30 | 10630 | 1.37 | 112.70 | 7.29  | 128.30 |
| ZB2-2-16  | 286  | 451  | 4.12   | 2279 | 7.65  | 0.02  | 103.50 | 0.23 | 3.89  | 7.92 | 1.78 | 43.00 | 14.68 | 192.30 | 74.50 | 376.00 | 76.90 | 702.00 | 146.60 | 10690 | 1.29 | 285.00 | 12.53 | 193.24 |

|          |      |      |       |      |       |       |        |       |        |       |       |        |       |        |        |        |        |         |        |       |      |        |        |        |
|----------|------|------|-------|------|-------|-------|--------|-------|--------|-------|-------|--------|-------|--------|--------|--------|--------|---------|--------|-------|------|--------|--------|--------|
| ZB2-2-17 | 292  | 320  | 6.60  | 2750 | 1.69  | 0.29  | 11.30  | 0.58  | 8.20   | 14.30 | 2.95  | 72.60  | 21.91 | 263.70 | 96.50  | 452.00 | 86.10  | 743.00  | 150.10 | 7590  | 0.42 | 95.60  | 6.20   | 108.04 |
| ZB2-2-18 | 286  | 209  | 9.23  | 606  | 0.82  | -     | 11.30  | 0.05  | 1.34   | 2.32  | 0.82  | 12.69  | 4.19  | 51.30  | 19.52  | 98.10  | 20.71  | 196.30  | 41.92  | 8670  | 0.25 | 44.16  | 3.19   | 58.14  |
| ZB2-2-19 | 288  | 256  | 6.48  | 983  | 2.53  | -     | 60.30  | 0.10  | 1.67   | 3.59  | 1.08  | 18.50  | 6.28  | 78.80  | 31.56  | 159.50 | 34.15  | 319.40  | 66.00  | 9390  | 0.76 | 129.80 | 6.49   | 105.74 |
| ZB2-2-20 | 293  | 588  | 7.75  | 3510 | 2.91  | 0.24  | 105.60 | 1.98  | 26.50  | 31.90 | 11.79 | 116.00 | 32.10 | 342.00 | 119.90 | 544.00 | 106.80 | 939.00  | 189.70 | 8280  | 0.45 | 266.00 | 8.38   | 103.36 |
| ZB2-2-21 | 297  | 470  | 3.94  | 1524 | 4.99  | 0.27  | 63.80  | 0.17  | 1.52   | 4.09  | 0.93  | 24.50  | 9.45  | 123.10 | 49.10  | 246.10 | 51.40  | 478.00  | 100.80 | 11160 | 0.94 | 194.30 | 9.67   | 144.80 |
| ZB2-2-23 | 292  | 363  | 4.64  | 1486 | 2.43  | 0.01  | 40.20  | 0.12  | 2.37   | 4.77  | 1.67  | 29.00  | 9.50  | 123.70 | 48.50  | 247.80 | 51.40  | 475.00  | 99.70  | 10230 | 0.53 | 71.10  | 3.98   | 64.57  |
| ZB2-2-24 | 289  | 307  | 7.90  | 2381 | 3.23  | 0.16  | 21.70  | 0.38  | 6.27   | 10.40 | 2.21  | 48.80  | 16.84 | 212.00 | 81.10  | 387.00 | 76.40  | 676.00  | 139.50 | 7400  | 0.56 | 145.10 | 7.88   | 132.73 |
| ZB2-2-25 | 291  | 410  | 7.49  | 2119 | 3.42  | -     | 40.40  | 0.09  | 1.61   | 4.32  | 1.20  | 29.00  | 11.47 | 157.80 | 65.40  | 351.00 | 77.50  | 751.00  | 164.00 | 9130  | 0.74 | 152.70 | 8.84   | 149.28 |
| ZB2-2-26 | 291  | 234  | 3.30  | 1427 | 3.15  | 0.00  | 14.18  | 0.10  | 1.77   | 3.59  | 0.62  | 24.00  | 8.62  | 118.70 | 46.30  | 243.70 | 52.00  | 476.00  | 100.20 | 8930  | 0.62 | 62.90  | 5.73   | 107.11 |
| ZB2-2-27 | 292  | 277  | 2.52  | 1739 | 1.82  | 0.01  | 26.00  | 0.13  | 2.30   | 5.66  | 0.64  | 37.20  | 12.15 | 154.40 | 60.50  | 287.00 | 57.90  | 513.00  | 103.30 | 10610 | 0.46 | 82.40  | 5.77   | 103.11 |
| ZB2-2-28 | 296  | 243  | 2.75  | 1317 | 2.98  | 0.02  | 55.40  | 0.09  | 1.76   | 3.99  | 0.81  | 23.90  | 8.36  | 108.80 | 42.30  | 221.00 | 45.60  | 422.00  | 87.00  | 11120 | 0.61 | 87.70  | 4.81   | 73.55  |
| ZB2-2-30 | 292  | 699  | 2.11  | 2871 | 11.18 | 0.12  | 35.20  | 0.18  | 2.95   | 8.63  | 0.33  | 56.10  | 20.02 | 264.20 | 96.30  | 473.00 | 92.50  | 800.00  | 157.90 | 10190 | 2.01 | 343.00 | 21.76  | 376.07 |
| ZB2-2-31 | 284  | 339  | 11.40 | 1529 | 1.33  | 0.03  | 16.12  | 0.12  | 2.00   | 4.29  | 1.76  | 27.70  | 9.22  | 124.20 | 49.40  | 248.40 | 52.40  | 493.00  | 103.80 | 7600  | 0.26 | 77.20  | 4.13   | 71.28  |
| ZB2-2-32 | 359  | 132  | 3.31  | 2010 | 3.43  | -     | 42.60  | 0.09  | 1.81   | 3.80  | 2.17  | 26.70  | 9.81  | 132.70 | 59.40  | 332.00 | 77.30  | 764.00  | 179.00 | 9630  | 0.33 | 279.60 | 23.77  | 337.55 |
| ZB2-2-33 | 293  | 2230 | 3.72  | 2077 | 3.11  | 60.20 | 173.00 | 23.00 | 113.00 | 29.70 | 1.71  | 64.40  | 18.00 | 195.40 | 72.00  | 340.00 | 66.00  | 569.00  | 110.30 | 9630  | 0.85 | 93.90  | 6.84   | 129.25 |
| ZB2-2-34 | 292  | 262  | 2.17  | 1052 | 5.03  | 0.02  | 23.20  | 0.05  | 0.78   | 1.95  | 0.16  | 16.40  | 6.14  | 83.10  | 34.80  | 177.30 | 41.30  | 348.00  | 74.60  | 12190 | 1.18 | 82.50  | 7.07   | 131.11 |
| ZB2-2-36 | 283  | 191  | 7.70  | 590  | 0.92  | -     | 13.87  | 0.04  | 0.97   | 1.85  | 0.50  | 10.84  | 3.72  | 47.50  | 19.21  | 95.10  | 21.45  | 201.20  | 43.40  | 9450  | 0.38 | 40.80  | 3.09   | 57.55  |
| ZB2-2-37 | 2529 | 260  | 4.06  | 1201 | 3.66  | -     | 53.10  | 0.24  | 4.05   | 7.07  | 1.39  | 31.70  | 9.09  | 107.20 | 38.80  | 182.60 | 37.80  | 343.00  | 71.70  | 12000 | 1.60 | 252.40 | 140.48 | 209.25 |
| ZB2-2-38 | 280  | 331  | 6.72  | 1465 | 4.30  | -     | 58.80  | 0.06  | 1.26   | 3.14  | 1.01  | 20.10  | 7.40  | 107.80 | 47.20  | 256.70 | 56.60  | 559.00  | 121.60 | 9050  | 0.74 | 97.20  | 5.26   | 90.69  |
| ZB2-2-39 | 378  | 144  | 5.26  | 680  | 1.93  | -     | 26.84  | 0.05  | 1.08   | 2.68  | 0.63  | 14.04  | 4.49  | 54.20  | 20.83  | 110.20 | 23.80  | 233.50  | 50.00  | 10340 | 0.66 | 160.90 | 12.25  | 157.55 |
| ZB2-2-40 | 289  | 302  | 2.87  | 2940 | 12.38 | -     | 71.50  | 0.28  | 5.14   | 13.62 | 0.20  | 83.50  | 25.87 | 316.00 | 108.30 | 470.00 | 86.20  | 688.00  | 127.60 | 7200  | 1.76 | 307.00 | 14.71  | 233.19 |
| ZB2-2-41 | 302  | 310  | 9.33  | 877  | 2.13  | 0.23  | 37.60  | 0.13  | 1.94   | 2.94  | 0.76  | 17.10  | 5.52  | 73.00  | 27.86  | 141.60 | 31.00  | 295.70  | 63.40  | 9440  | 0.43 | 105.90 | 5.35   | 80.02  |
| ZB2-2-42 | 293  | 508  | 4.85  | 1690 | 6.51  | -     | 71.20  | 0.08  | 1.78   | 4.10  | 1.22  | 30.20  | 10.58 | 139.90 | 54.50  | 284.50 | 62.40  | 563.00  | 115.10 | 10890 | 1.18 | 246.20 | 10.92  | 164.49 |
| ZB2-2-43 | 293  | 580  | 12.40 | 2676 | 2.68  | 0.02  | 79.40  | 0.29  | 4.61   | 9.70  | 5.34  | 58.50  | 19.19 | 237.60 | 87.70  | 430.00 | 86.90  | 778.00  | 161.40 | 7380  | 0.40 | 163.10 | 5.99   | 81.27  |
| ZB2-2-44 | 299  | 268  | 8.30  | 1478 | 3.52  | 0.04  | 14.11  | 0.08  | 1.63   | 3.50  | 0.71  | 23.20  | 8.50  | 118.00 | 48.90  | 238.00 | 53.00  | 468.00  | 97.80  | 8540  | 0.67 | 60.10  | 5.17   | 96.97  |
| ZB2-2-45 | 286  | 420  | 5.83  | 1842 | 4.86  | -     | 94.70  | 0.16  | 2.87   | 6.53  | 2.52  | 38.00  | 13.08 | 157.20 | 61.00  | 302.30 | 63.10  | 567.00  | 118.40 | 9300  | 0.84 | 198.80 | 8.48   | 129.40 |
| ZB2-2-46 | 295  | 250  | 4.14  | 1518 | 5.91  | -     | 18.16  | 0.13  | 2.06   | 4.12  | 0.59  | 27.70  | 10.03 | 125.40 | 50.70  | 256.60 | 54.50  | 483.00  | 101.60 | 9040  | 1.16 | 130.60 | 11.15  | 204.16 |
| ZB2-2-47 | 301  | 327  | 9.62  | 1147 | 1.85  | 0.00  | 27.44  | 0.09  | 1.66   | 2.65  | 1.59  | 17.60  | 6.30  | 85.40  | 35.80  | 190.80 | 42.60  | 408.00  | 94.10  | 7960  | 0.34 | 64.40  | 3.70   | 58.51  |
| ZB2-2-48 | 291  | 786  | 9.60  | 4940 | 3.73  | 0.20  | 135.00 | 1.29  | 21.60  | 36.00 | 13.50 | 135.80 | 40.00 | 468.00 | 157.80 | 745.00 | 155.50 | 1358.00 | 272.00 | 7250  | 0.54 | 331.00 | 10.97  | 157.98 |
| ZB2-2-50 | 289  | 302  | 3.62  | 967  | 1.85  | 0.04  | 17.88  | 0.06  | 0.52   | 1.83  | 0.39  | 12.00  | 4.83  | 68.10  | 29.97  | 165.20 | 37.65  | 385.30  | 84.40  | 10990 | 0.53 | 55.50  | 4.63   | 87.24  |

|          |      |     |       |      |      |      |        |      |       |       |      |       |       |        |       |        |       |        |        |       |      |        |       |        |
|----------|------|-----|-------|------|------|------|--------|------|-------|-------|------|-------|-------|--------|-------|--------|-------|--------|--------|-------|------|--------|-------|--------|
| ZB2-2-52 | 279  | 400 | 4.98  | 1179 | 1.53 | 0.01 | 16.60  | 0.07 | 1.12  | 3.04  | 0.50 | 17.10 | 6.67  | 90.90  | 39.10 | 208.00 | 46.10 | 459.00 | 101.50 | 10510 | 0.46 | 58.50  | 4.66  | 86.37  |
| ZB2-2-53 | 283  | 386 | 5.49  | 1416 | 3.06 | -    | 26.90  | 0.04 | 1.09  | 3.23  | 0.72 | 19.60 | 7.74  | 108.10 | 44.40 | 236.80 | 55.00 | 532.00 | 117.90 | 9720  | 0.74 | 150.40 | 8.79  | 152.55 |
| ZB2-2-54 | 334  | 212 | 5.70  | 618  | 1.49 | -    | 43.50  | 0.10 | 1.86  | 2.80  | 1.64 | 15.08 | 4.38  | 53.00  | 20.30 | 100.20 | 22.34 | 207.80 | 46.30  | 8300  | 0.47 | 99.70  | 6.61  | 96.30  |
| ZB2-2-55 | 300  | 413 | 9.37  | 1784 | 1.78 | -    | 8.99   | 0.07 | 1.68  | 4.84  | 0.69 | 31.00 | 11.25 | 154.00 | 60.80 | 301.00 | 60.60 | 538.00 | 110.30 | 8920  | 0.54 | 150.00 | 13.12 | 239.47 |
| ZB2-2-56 | 1874 | 601 | 15.70 | 1369 | 1.05 | 0.03 | 3.49   | 0.38 | 6.48  | 10.08 | 0.47 | 40.90 | 12.42 | 139.80 | 47.10 | 209.50 | 39.70 | 345.00 | 65.70  | 10220 | 0.36 | 101.80 | 78.70 | 192.01 |
| ZB2-2-57 | 292  | 129 | 3.74  | 734  | 3.30 | -    | 53.20  | 0.05 | 0.95  | 1.29  | 0.58 | 9.07  | 3.15  | 45.10  | 20.71 | 120.00 | 30.32 | 333.00 | 80.00  | 10800 | 0.80 | 160.30 | 9.75  | 167.03 |
| ZB2-2-58 | 301  | 274 | 8.01  | 1032 | 0.87 | 0.02 | 22.91  | 0.20 | 3.35  | 4.87  | 2.45 | 22.90 | 7.24  | 92.40  | 34.70 | 169.80 | 35.70 | 340.00 | 73.80  | 7520  | 0.20 | 53.40  | 2.52  | 37.89  |
| ZB2-2-59 | 288  | 407 | 3.82  | 2691 | 6.49 | 0.12 | 38.20  | 0.25 | 4.22  | 10.58 | 1.49 | 58.80 | 19.49 | 254.00 | 95.60 | 455.00 | 91.00 | 794.00 | 157.50 | 8830  | 1.39 | 300.00 | 17.33 | 292.27 |
| ZB2-2-60 | 283  | 228 | 4.65  | 710  | 1.40 | 0.02 | 13.65  | 0.03 | 0.40  | 1.44  | 0.30 | 9.03  | 3.49  | 51.40  | 22.13 | 125.50 | 29.60 | 299.70 | 68.30  | 10470 | 0.43 | 41.00  | 3.46  | 66.52  |
| ZB2-2-61 | 292  | 267 | 14.70 | 1197 | 1.25 | 0.02 | 31.50  | 0.18 | 2.82  | 4.92  | 2.92 | 25.90 | 8.55  | 102.10 | 39.00 | 193.10 | 39.60 | 373.00 | 77.20  | 6540  | 0.26 | 70.60  | 3.41  | 53.41  |
| ZB2-2-62 | 284  | 223 | 13.10 | 718  | 1.35 | -    | 32.90  | 0.08 | 1.57  | 3.11  | 1.17 | 15.78 | 5.12  | 63.50  | 23.70 | 116.20 | 24.11 | 227.00 | 47.60  | 8290  | 0.45 | 44.70  | 2.31  | 38.74  |
| ZB2-2-63 | 290  | 249 | 2.26  | 2119 | 4.12 | -    | 20.54  | 0.26 | 4.61  | 8.39  | 0.96 | 44.60 | 14.83 | 190.90 | 72.40 | 354.00 | 73.00 | 654.00 | 132.00 | 9710  | 0.92 | 106.70 | 8.44  | 157.00 |
| ZB2-2-64 | 299  | 527 | 3.85  | 1913 | 1.82 | 3.43 | 25.20  | 1.22 | 8.80  | 7.69  | 1.98 | 42.20 | 13.07 | 164.50 | 63.70 | 314.00 | 65.00 | 594.00 | 123.00 | 7690  | 0.32 | 87.70  | 5.96  | 101.48 |
| ZB2-2-65 | 286  | 647 | 5.96  | 2506 | 5.76 | 0.00 | 71.90  | 0.17 | 3.58  | 8.07  | 2.05 | 44.50 | 15.89 | 206.50 | 81.70 | 411.00 | 87.80 | 800.00 | 165.40 | 10230 | 0.97 | 141.10 | 7.37  | 121.60 |
| ZB2-2-66 | 370  | 96  | 1.75  | 1599 | 9.98 | 0.02 | 54.90  | 0.03 | 0.58  | 1.94  | 0.90 | 13.45 | 5.42  | 80.40  | 40.30 | 260.10 | 70.50 | 805.00 | 194.20 | 12090 | 0.82 | 205.00 | 24.63 | 363.37 |
| ZB2-2-67 | 282  | 441 | 2.75  | 2159 | 9.64 | 0.01 | 58.50  | 0.14 | 2.94  | 7.17  | 0.63 | 42.40 | 14.93 | 192.20 | 73.10 | 358.00 | 73.90 | 655.00 | 128.30 | 10630 | 1.68 | 442.00 | 20.74 | 338.39 |
| ZB2-2-68 | 305  | 487 | 8.70  | 2750 | 5.13 | 0.11 | 110.50 | 0.82 | 13.20 | 17.40 | 6.81 | 75.40 | 22.50 | 262.00 | 97.00 | 443.00 | 94.60 | 836.00 | 171.50 | 9250  | 0.79 | 424.00 | 14.10 | 166.52 |
| ZB2-2-69 | 292  | 302 | 8.26  | 1143 | 2.44 | 0.01 | 50.80  | 0.11 | 2.11  | 4.32  | 1.14 | 23.30 | 7.86  | 95.90  | 37.50 | 190.60 | 39.60 | 382.00 | 79.70  | 8730  | 0.65 | 95.40  | 5.03  | 81.88  |
| ZB2-2-70 | 292  | 501 | 13.90 | 1823 | 2.34 | 0.00 | 29.89  | 0.12 | 2.70  | 5.95  | 2.74 | 38.30 | 12.74 | 160.40 | 61.10 | 291.50 | 61.90 | 553.00 | 114.70 | 8670  | 0.70 | 116.90 | 7.04  | 120.25 |
| ZB2-2-71 | 294  | 407 | 4.89  | 2233 | 2.12 | 0.04 | 38.30  | 0.40 | 6.04  | 10.26 | 2.52 | 49.50 | 15.89 | 191.70 | 75.20 | 354.00 | 76.40 | 713.00 | 141.60 | 7930  | 0.46 | 141.50 | 7.46  | 120.79 |
| ZB2-2-72 | 1824 | 111 | 8.60  | 228  | 1.22 | -    | 5.12   | 0.02 | 0.52  | 0.91  | 0.08 | 4.41  | 1.59  | 18.60  | 7.60  | 37.90  | 8.06  | 76.90  | 15.81  | 10170 | 0.58 | 39.90  | 51.40 | 140.54 |
| ZB2-2-73 | 295  | 219 | 7.17  | 824  | 2.28 | 0.00 | 54.00  | 0.08 | 1.76  | 2.95  | 0.98 | 16.82 | 5.63  | 70.20  | 26.72 | 134.50 | 28.99 | 274.60 | 57.00  | 8950  | 0.61 | 132.80 | 5.73  | 83.82  |
| ZB2-2-74 | 290  | 290 | 4.71  | 979  | 1.66 | -    | 18.17  | 0.05 | 0.97  | 2.40  | 0.50 | 13.10 | 5.29  | 71.50  | 30.33 | 169.20 | 38.50 | 390.00 | 85.30  | 10150 | 0.49 | 69.50  | 5.14  | 94.17  |
| ZB2-2-75 | 290  | 312 | 5.42  | 1915 | 6.28 | 0.20 | 26.92  | 0.22 | 3.61  | 5.97  | 0.65 | 41.10 | 13.96 | 181.50 | 68.60 | 312.20 | 61.30 | 546.00 | 104.30 | 8030  | 1.12 | 186.80 | 11.13 | 189.31 |
| ZB2-2-77 | 280  | 295 | 10.15 | 1235 | 1.73 | 0.00 | 14.47  | 0.12 | 1.75  | 3.55  | 1.08 | 20.10 | 7.19  | 96.60  | 40.10 | 213.80 | 45.70 | 454.00 | 97.30  | 7660  | 0.40 | 58.50  | 4.51  | 85.54  |
| ZB2-2-78 | 291  | 250 | 13.50 | 1318 | 2.10 | 0.01 | 41.00  | 0.14 | 2.81  | 4.54  | 2.43 | 25.60 | 8.30  | 107.40 | 41.80 | 219.80 | 46.10 | 421.00 | 89.30  | 6910  | 0.42 | 75.50  | 4.03  | 66.31  |
| ZB2-2-79 | 286  | 323 | 2.62  | 1726 | 5.09 | 1.28 | 47.80  | 0.52 | 3.76  | 5.16  | 0.77 | 31.00 | 11.69 | 150.80 | 59.40 | 282.80 | 58.90 | 545.00 | 109.10 | 9770  | 0.93 | 194.00 | 10.97 | 187.22 |
| ZB2-2-80 | 283  | 482 | 3.62  | 1950 | 6.25 | 0.03 | 69.60  | 0.10 | 1.74  | 5.00  | 1.13 | 32.30 | 10.90 | 154.00 | 62.80 | 328.00 | 70.20 | 677.00 | 136.10 | 9820  | 1.08 | 130.10 | 7.43  | 132.25 |
| ZB2-2-81 | 288  | 372 | 20.70 | 1636 | 1.96 | 0.06 | 43.50  | 0.34 | 4.63  | 8.74  | 4.86 | 41.20 | 12.86 | 152.00 | 56.40 | 259.60 | 51.30 | 444.00 | 92.10  | 6590  | 0.42 | 96.80  | 4.28  | 65.38  |
| ZB2-2-82 | 294  | 264 | 2.12  | 641  | 0.97 | 0.00 | 5.87   | 0.03 | 0.25  | 1.34  | 0.23 | 7.30  | 3.37  | 45.70  | 20.10 | 115.30 | 25.80 | 264.00 | 58.00  | 10740 | 0.31 | 37.10  | 5.88  | 110.45 |

|           |      |      |       |      |       |       |        |       |        |       |       |       |       |        |        |        |        |         |        |       |       |        |         |         |
|-----------|------|------|-------|------|-------|-------|--------|-------|--------|-------|-------|-------|-------|--------|--------|--------|--------|---------|--------|-------|-------|--------|---------|---------|
| ZB2-2-83  | 292  | 509  | 4.57  | 2089 | 4.45  | 0.18  | 36.00  | 0.19  | 3.20   | 6.41  | 1.71  | 38.40 | 13.78 | 179.70 | 72.30  | 347.00 | 75.20  | 687.00  | 139.40 | 8970  | 0.79  | 121.90 | 7.75    | 132.59  |
| ZB2-2-84  | 290  | 737  | 12.00 | 3700 | 4.24  | 0.10  | 130.80 | 0.59  | 8.98   | 15.30 | 6.63  | 85.70 | 27.00 | 336.00 | 125.30 | 599.00 | 118.20 | 1057.00 | 210.80 | 8180  | 0.62  | 282.60 | 9.92    | 132.81  |
| ZB2-2-85  | 290  | 841  | 1.50  | 3090 | 17.27 | 0.04  | 39.30  | 0.14  | 2.88   | 7.14  | 0.16  | 61.50 | 22.08 | 295.00 | 112.40 | 523.00 | 106.60 | 905.00  | 177.20 | 10130 | 2.68  | 334.00 | 25.91   | 467.31  |
| ZB2-2-86  | 285  | 2530 | 2.40  | 1736 | 5.24  | 34.30 | 132.00 | 11.80 | 55.80  | 14.90 | 1.24  | 43.60 | 12.47 | 152.20 | 59.60  | 289.20 | 60.70  | 546.00  | 109.40 | 9510  | 0.92  | 303.00 | 14.40   | 230.14  |
| ZB2-2-87  | 291  | 1771 | 7.56  | 1784 | 3.95  | 71.20 | 262.00 | 24.20 | 113.00 | 26.30 | 3.60  | 53.50 | 14.57 | 160.90 | 59.90  | 289.00 | 58.70  | 515.00  | 99.00  | 9280  | 0.89  | 144.70 | 6.99    | 108.53  |
| ZB2-2-88  | 290  | 311  | 2.31  | 1571 | 7.15  | -     | 38.90  | 0.07  | 1.60   | 4.44  | 0.23  | 28.90 | 10.29 | 138.50 | 54.50  | 268.00 | 57.10  | 502.00  | 103.60 | 11200 | 1.43  | 116.90 | 10.08   | 192.13  |
| ZB2-2-90  | 293  | 584  | 4.60  | 1820 | 8.59  | 0.94  | 64.40  | 0.54  | 2.58   | 4.61  | 1.04  | 27.40 | 9.84  | 137.00 | 57.70  | 313.00 | 69.40  | 683.00  | 138.40 | 9330  | 1.52  | 115.60 | 6.86    | 128.02  |
| ZB2-2-91  | 295  | 323  | 6.30  | 2360 | 4.70  | 0.14  | 25.50  | 0.34  | 5.50   | 10.80 | 1.42  | 60.60 | 20.14 | 234.40 | 85.10  | 390.00 | 73.40  | 622.00  | 117.40 | 7540  | 0.92  | 191.90 | 10.88   | 177.60  |
| ZB2-2-92  | 282  | 301  | 4.11  | 1275 | 3.24  | -     | 19.77  | 0.10  | 1.82   | 4.02  | 0.60  | 26.30 | 9.39  | 116.10 | 43.70  | 208.30 | 42.30  | 387.00  | 76.40  | 8750  | 0.72  | 201.00 | 10.01   | 166.26  |
| ZB2-2-93  | 282  | 284  | 5.33  | 814  | 1.51  | -     | 16.56  | 0.04  | 0.92   | 1.49  | 0.43  | 11.20 | 4.26  | 61.00  | 25.85  | 137.10 | 32.30  | 330.00  | 73.40  | 10370 | 0.48  | 70.60  | 5.26    | 98.25   |
| ZB2-2-94  | 282  | 229  | 8.03  | 990  | 2.07  | -     | 15.90  | 0.07  | 1.26   | 2.73  | 0.75  | 15.82 | 5.61  | 77.60  | 32.00  | 173.00 | 38.40  | 366.00  | 77.60  | 8560  | 0.46  | 44.60  | 3.69    | 69.49   |
| ZB2-2-95  | 282  | 357  | 8.65  | 1672 | 2.03  | 0.02  | 20.77  | 0.20  | 3.23   | 5.93  | 2.19  | 32.20 | 10.97 | 140.90 | 55.50  | 280.00 | 59.60  | 564.00  | 115.30 | 7830  | 0.31  | 105.00 | 5.76    | 100.30  |
| ZB2-2-96  | 290  | 388  | 2.53  | 1419 | 5.19  | 0.05  | 34.30  | 0.11  | 1.85   | 4.78  | 0.41  | 25.30 | 9.43  | 120.20 | 47.70  | 239.00 | 50.00  | 464.00  | 91.90  | 9710  | 0.99  | 132.50 | 9.37    | 168.65  |
| ZB2-2-97  | 285  | 487  | 8.20  | 2585 | 5.08  | 0.01  | 99.00  | 0.32  | 4.75   | 9.78  | 4.01  | 54.90 | 18.35 | 227.20 | 86.10  | 423.00 | 87.20  | 792.00  | 157.40 | 8990  | 0.86  | 226.40 | 8.88    | 130.83  |
| ZB2-2-98  | 289  | 272  | 9.81  | 862  | 0.51  | -     | 3.58   | 0.03  | 0.80   | 2.26  | 0.40  | 15.50 | 5.61  | 72.00  | 29.40  | 145.80 | 30.20  | 277.00  | 56.80  | 9140  | 0.27  | 25.84  | 3.73    | 75.57   |
| ZB2-2-100 | 279  | 204  | 7.81  | 905  | 1.97  | -     | 51.70  | 0.10  | 1.98   | 3.28  | 1.33  | 17.40 | 6.05  | 76.10  | 29.60  | 144.10 | 31.20  | 295.00  | 60.00  | 8950  | 0.58  | 101.30 | 4.97    | 83.96   |
| ZB2-2-101 | 291  | 682  | 5.59  | 2050 | 2.19  | 0.04  | 59.80  | 0.27  | 5.11   | 7.95  | 2.77  | 44.50 | 14.61 | 177.60 | 68.00  | 330.00 | 72.30  | 653.00  | 128.60 | 9520  | 0.44  | 122.80 | 5.81    | 91.85   |
| ZB2-2-102 | 2581 | 177  | 9.06  | 600  | 0.65  | 0.02  | 22.33  | 0.22  | 3.55   | 5.90  | 1.36  | 22.20 | 5.77  | 59.50  | 19.83  | 89.70  | 17.06  | 157.60  | 30.93  | 9620  | 0.24  | 62.70  | 38.59   | 57.65   |
| ZB2-2-103 | 277  | 345  | 28.70 | 887  | 0.42  | 0.01  | 2.46   | 0.08  | 1.60   | 2.56  | 1.65  | 14.88 | 5.12  | 71.20  | 29.80  | 153.40 | 30.60  | 288.00  | 61.90  | 5680  | 0.11  | 17.30  | 1.41    | 27.93   |
| ZB2-2-104 | 292  | 247  | 2.66  | 1253 | 4.92  | 0.09  | 23.20  | 0.10  | 1.27   | 3.38  | 0.48  | 20.10 | 8.16  | 102.70 | 45.40  | 204.00 | 46.90  | 428.00  | 85.20  | 9650  | 1.31  | 105.60 | 8.89    | 171.41  |
| ZB2-2-105 | 287  | 252  | 6.50  | 905  | 1.89  | -     | 9.74   | 0.04  | 1.20   | 2.57  | 0.39  | 16.50 | 6.05  | 78.00  | 31.50  | 162.10 | 34.00  | 312.00  | 62.90  | 8130  | 0.58  | 22.30  | 2.49    | 50.55   |
| ZB2-2-106 | 285  | 366  | 4.12  | 1043 | 1.88  | -     | 17.53  | 0.04  | 0.78   | 1.91  | 0.41  | 13.26 | 5.62  | 77.30  | 32.80  | 179.40 | 41.60  | 420.00  | 94.70  | 10530 | 0.59  | 55.90  | 4.72    | 89.87   |
| ZB2-2-107 | 281  | 421  | 9.30  | 1521 | 3.67  | 0.02  | 53.30  | 0.14  | 2.35   | 5.31  | 2.05  | 29.20 | 10.18 | 127.70 | 49.70  | 253.20 | 54.20  | 489.00  | 102.50 | 8490  | 0.59  | 160.70 | 6.81    | 105.28  |
| ZB2-2-108 | 290  | 254  | 5.00  | 1449 | 2.82  | -     | 15.77  | 0.10  | 1.88   | 4.79  | 0.73  | 30.00 | 9.87  | 129.90 | 49.40  | 242.20 | 45.50  | 396.00  | 78.30  | 9160  | 0.80  | 141.90 | 8.68    | 145.97  |
| ZB2-2-109 | 284  | 314  | 4.36  | 1796 | 4.68  | -     | 31.10  | 0.12  | 2.62   | 5.32  | 1.05  | 31.30 | 10.86 | 147.50 | 60.90  | 309.90 | 68.00  | 631.00  | 125.20 | 8650  | 0.79  | 85.90  | 6.51    | 120.55  |
| ZB2-2-110 | 288  | 204  | 3.99  | 1346 | 0.61  | 0.02  | 8.15   | 0.28  | 4.40   | 6.50  | 2.46  | 33.00 | 10.45 | 124.30 | 46.60  | 218.40 | 44.10  | 397.00  | 80.20  | 7070  | 0.15  | 35.00  | 2.33    | 42.00   |
| ZB3-1-1   | 309  | 277  | 1.86  | 1056 | 3     | -     | 25.07  | 0.034 | 0.59   | 1.91  | 0.95  | 13.44 | 5.02  | 68.4   | 30.67  | 176.4  | 43.3   | 454     | 110.7  | 9980  | 1.028 | 124.8  | 14.2354 | 258.399 |
| ZB3-1-2   | 287  | 296  | 26.1  | 1804 | 1.63  | 0.09  | 27.5   | 0.788 | 10.28  | 14.9  | 3.61  | 65.3  | 17.62 | 185.7  | 59.4   | 258    | 48.5   | 411     | 78.6   | 8400  | 0.528 | 365    | 14.759  | 219.87  |
| ZB3-1-3   | 2516 | 164  | 13.97 | 307  | 1.53  | -     | 12.33  | 0.04  | 0.65   | 1.63  | 0.188 | 7.42  | 2.15  | 26.5   | 9.61   | 47.2   | 9.8    | 90.9    | 18.61  | 11160 | 0.528 | 24.61  | 20.3671 | 34.2747 |

|          |      |      |       |      |      |      |       |        |      |       |       |       |       |       |       |       |       |       |       |       |       |       |         |         |
|----------|------|------|-------|------|------|------|-------|--------|------|-------|-------|-------|-------|-------|-------|-------|-------|-------|-------|-------|-------|-------|---------|---------|
| ZB3-1-4  | 1835 | 56   | 7.38  | 189  | 3.46 | -    | 6.66  | 0.04   | 0.65 | 1.88  | 0.091 | 6.62  | 1.82  | 20.02 | 6.84  | 29.3  | 5.3   | 42.1  | 8.92  | 11290 | 1.82  | 64    | 86.129  | 237.426 |
| ZB3-1-5  | 308  | 92   | 3.14  | 824  | 3.44 | -    | 26.9  | 0.0228 | 0.32 | 1.39  | 0.653 | 9.99  | 3.62  | 50.4  | 23.1  | 135.5 | 33.9  | 368   | 89.7  | 11230 | 0.902 | 245.8 | 28.1213 | 514.133 |
| ZB3-1-6  | 312  | 119  | 2.58  | 980  | 4.69 | -    | 29.1  | 0.036  | 0.68 | 1.69  | 0.93  | 12.31 | 4.4   | 65.6  | 28.75 | 164.6 | 39.4  | 411   | 96.5  | 11280 | 1.333 | 147.3 | 14.5669 | 255.557 |
| ZB3-1-7  | 315  | 320  | 2.56  | 1861 | 12.1 | -    | 90.2  | 0.07   | 1.38 | 3.75  | 0.83  | 28.9  | 10.75 | 148   | 58.6  | 294.7 | 61.7  | 559   | 113.9 | 11580 | 2.91  | 359.6 | 23.247  | 364.099 |
| ZB3-1-8  | 1826 | 145  | 8.11  | 717  | 1.29 | 0.03 | 8.91  | 0.342  | 4.69 | 6.71  | 0.85  | 24.9  | 7.17  | 74.6  | 24.1  | 100.3 | 18.94 | 159.2 | 29.9  | 8590  | 0.556 | 68.1  | 50.3828 | 132.893 |
| ZB3-1-9  | 311  | 207  | 4.72  | 674  | 0.9  | 0.01 | 12.44 | 0.056  | 0.68 | 2.24  | 0.89  | 11.19 | 3.65  | 49.6  | 20.5  | 107.5 | 24.6  | 248   | 56.7  | 8320  | 0.318 | 50.6  | 4.27642 | 73.4625 |
| ZB3-1-10 | 310  | 75   | 2.76  | 667  | 3.44 | 0.03 | 19.71 | 0.0321 | 0.44 | 1.01  | 0.529 | 8.81  | 3.3   | 44.6  | 19.6  | 111.2 | 27.16 | 280.4 | 68.9  | 10760 | 0.91  | 155.4 | 16.8208 | 301.004 |
| ZB3-1-11 | 288  | 159  | 4.58  | 826  | 2.97 | -    | 46.1  | 0.057  | 0.99 | 2.6   | 1.21  | 15.8  | 5.24  | 63.3  | 25.1  | 129.6 | 28.6  | 286   | 62.9  | 10660 | 0.783 | 258   | 16.7123 | 298.067 |
| ZB3-1-12 | 303  | 162  | 3.54  | 916  | 4.29 | -    | 46.9  | 0.059  | 1.37 | 2.16  | 1.08  | 14.85 | 4.99  | 65.4  | 27.77 | 149.2 | 36    | 360   | 84.9  | 10370 | 1.147 | 274.2 | 14.2296 | 219.898 |
| ZB3-1-13 | 1865 | 201  | 7.98  | 663  | 1.91 | -    | 9.59  | 0.128  | 2.75 | 3.97  | 0.93  | 16.1  | 5.21  | 61.4  | 21.95 | 101.8 | 20.89 | 180.3 | 35.2  | 12340 | 1.014 | 126.2 | 116.688 | 300.989 |
| ZB3-1-14 | 1849 | 209  | 19.2  | 253  | 1.32 | 0.08 | 5.47  | 0.17   | 3.11 | 5.69  | 0.07  | 21.3  | 4.47  | 34.9  | 8.13  | 25.69 | 3.86  | 25.7  | 4.08  | 13560 | 0.919 | 313.7 | 173.95  | 419.782 |
| ZB3-1-15 | 1827 | 190  | 10.1  | 903  | 1.22 | 0.01 | 7.39  | 0.149  | 2.59 | 5.6   | 0.544 | 29.1  | 8.36  | 92.1  | 31.1  | 133   | 25.82 | 214.8 | 40    | 9680  | 0.49  | 101.8 | 58.266  | 144.117 |
| ZB3-1-16 | 1856 | 471  | 11.5  | 872  | 0.98 | 0.00 | 1.08  | 0.036  | 0.52 | 3.32  | 0.086 | 24.8  | 8.91  | 93.2  | 25.95 | 98.6  | 17.89 | 148.6 | 28.08 | 13580 | 0.872 | 61.7  | 285.742 | 801.766 |
| ZB3-1-17 | 306  | 111  | 3.43  | 937  | 5.25 | 0.06 | 28.37 | 0.051  | 0.75 | 1.52  | 0.582 | 10.68 | 4.02  | 56.4  | 26.79 | 158.6 | 41.4  | 455   | 115.4 | 11240 | 1.5   | 215.3 | 22.9869 | 417.734 |
| ZB3-1-18 | 1870 | 1124 | 11.48 | 2254 | 1.01 | 0.73 | 8.4   | 2.45   | 16.8 | 18.1  | 4     | 62.8  | 20.48 | 222.7 | 73.5  | 331   | 62.9  | 544   | 99.3  | 12120 | 0.754 | 85.7  | 259.22  | 724.73  |
| ZB3-1-19 | 1840 | 206  | 22.7  | 191  | 1.21 | 0.00 | 5.01  | 0.165  | 3.1  | 4.65  | 0.053 | 15.83 | 3.61  | 26.1  | 6.21  | 19.3  | 2.76  | 19.5  | 3.05  | 12370 | 0.623 | 301.9 | 167.528 | 404.769 |
| ZB3-1-20 | 306  | 126  | 2.35  | 467  | 1.21 | -    | 16.96 | 0.0172 | 0.23 | 0.59  | 0.393 | 5.13  | 1.8   | 28.5  | 13.22 | 81.5  | 21.35 | 239.2 | 61.9  | 10090 | 0.309 | 95.6  | 7.50924 | 130.374 |
| ZB3-1-21 | 311  | 159  | 5.96  | 1342 | 6    | -    | 54.5  | 0.081  | 1.3  | 2.7   | 1.24  | 17.76 | 6.98  | 92.5  | 39.9  | 229.9 | 55.5  | 571   | 137.1 | 9680  | 1.269 | 260.1 | 14.9322 | 233.143 |
| ZB3-1-22 | 2532 | 152  | 6.98  | 418  | 1.7  | -    | 22.3  | 0.0231 | 0.43 | 1.58  | 0.263 | 7.73  | 2.63  | 30.8  | 12.25 | 64.9  | 14.9  | 146.9 | 31.4  | 12160 | 0.794 | 84.5  | 97.1937 | 165.674 |
| ZB3-1-23 | 2521 | 245  | 8.98  | 668  | 2.47 | -    | 25.89 | 0.074  | 1.23 | 2.49  | 0.459 | 13.07 | 4.47  | 53.5  | 20.4  | 102.2 | 22.77 | 215.2 | 46.6  | 11230 | 1.42  | 183.2 | 108.138 | 162.688 |
| ZB3-1-24 | 374  | 150  | 6.87  | 423  | 1.46 | -    | 18.01 | 0.033  | 0.63 | 1.24  | 0.37  | 7.69  | 2.53  | 31.8  | 12.86 | 66.2  | 15.68 | 158.6 | 35.9  | 10370 | 0.556 | 119.6 | 10.5293 | 144.855 |
| ZB3-1-25 | 1855 | 283  | 16.4  | 275  | 0.94 | -    | 4.33  | 0.084  | 1.68 | 4.9   | 0.131 | 27    | 6.15  | 44.9  | 9.18  | 27.2  | 3.26  | 22    | 4.06  | 13490 | 0.447 | 88.5  | 112.436 | 292.538 |
| ZB3-1-26 | 1899 | 612  | 4.78  | 1258 | 1.68 | -    | 1.84  | 0.0252 | 0.56 | 2.56  | 0.072 | 17.7  | 7.36  | 97.2  | 39.8  | 209.5 | 46.8  | 446   | 92.8  | 11790 | 1.215 | 79.6  | 216.655 | 579.854 |
| ZB3-1-27 | 314  | 169  | 4.44  | 860  | 1.54 | 0.00 | 64.9  | 0.129  | 2.19 | 3.72  | 1.75  | 18.9  | 5.98  | 71.9  | 27.24 | 135.2 | 28.06 | 264.5 | 55.2  | 8260  | 0.454 | 188.5 | 8.12807 | 107.853 |
| ZB3-1-28 | 295  | 213  | 6.17  | 1721 | 4.74 | 0.03 | 104.8 | 0.529  | 8.77 | 12.13 | 5.79  | 52    | 14.81 | 162.1 | 54.5  | 249.2 | 49.2  | 444   | 87.5  | 7610  | 0.806 | 235.3 | 13.3316 | 221.643 |
| ZB3-1-29 | 292  | 144  | 3.67  | 986  | 4.57 | -    | 52    | 0.06   | 1.41 | 2.54  | 1.18  | 17    | 5.6   | 76.3  | 30.9  | 158   | 35    | 346   | 74.4  | 11110 | 1.15  | 217.1 | 17.4799 | 323.2   |
| ZB3-1-30 | 2498 | 234  | 4.74  | 658  | 1.28 | -    | 24.3  | 0.064  | 1.17 | 2.36  | 0.25  | 13.7  | 4.53  | 54.8  | 20.6  | 100.1 | 21.7  | 187   | 37.7  | 10740 | 0.371 | 84.5  | 46.4026 | 76.036  |
| ZB3-1-31 | 321  | 175  | 4.57  | 1345 | 1.13 | 0.02 | 47.4  | 0.337  | 4.96 | 9.5   | 3.49  | 39.6  | 11.21 | 126   | 44.4  | 209   | 42.8  | 383   | 79.2  | 8570  | 0.365 | 135   | 6.59415 | 90.6655 |
| ZB3-1-32 | 1864 | 382  | 23.7  | 312  | 1.49 | -    | 6.6   | 0.132  | 3.11 | 8.05  | 0.136 | 27.7  | 5.97  | 45    | 9.97  | 30.8  | 4.54  | 32.2  | 4.96  | 13560 | 0.449 | 120.9 | 134.442 | 353.802 |
| ZB3-1-33 | 2528 | 187  | 7.97  | 519  | 1.89 | -    | 30.1  | 0.083  | 2.13 | 3     | 0.61  | 15.38 | 4.16  | 46.1  | 16.27 | 75.4  | 15.55 | 140   | 28.6  | 10970 | 0.758 | 252   | 227.046 | 367.496 |



|          |      |      |       |      |       |      |       |        |       |      |       |       |       |       |       |       |       |       |       |       |       |       |         |         |
|----------|------|------|-------|------|-------|------|-------|--------|-------|------|-------|-------|-------|-------|-------|-------|-------|-------|-------|-------|-------|-------|---------|---------|
| ZB3-1-34 | 1870 | 340  | 27.5  | 1037 | 1.21  | 0.03 | 32.3  | 0.409  | 6.43  | 9.87 | 2.98  | 37.6  | 10.22 | 111.7 | 35.6  | 151.7 | 28.6  | 235.2 | 44.3  | 9460  | 0.41  | 299.2 | 119.568 | 264.987 |
| ZB3-1-35 | 2503 | 126  | 8.47  | 340  | 1.37  | -    | 28.6  | 0.146  | 1.88  | 3.69 | 1.02  | 13.6  | 3.44  | 32.9  | 10.73 | 45    | 9.2   | 84.6  | 17.22 | 9230  | 0.508 | 126.2 | 86.5118 | 130.637 |
| ZB3-1-36 | 313  | 167  | 7.84  | 1056 | 2.61  | -    | 32.4  | 0.055  | 1.36  | 1.96 | 1.32  | 14.15 | 5.47  | 74.1  | 32.8  | 176   | 41.7  | 421   | 96.3  | 8220  | 0.737 | 263.4 | 16.9104 | 263.243 |
| ZB3-1-37 | 305  | 169  | 3.72  | 680  | 2.3   | -    | 28.5  | 0.035  | 0.81  | 1.67 | 0.81  | 10.72 | 3.57  | 49    | 20.86 | 110.2 | 25.8  | 273   | 61.6  | 10060 | 0.817 | 128.9 | 9.94335 | 168.637 |
| ZB3-1-38 | 323  | 67   | 1.72  | 417  | 1.41  | -    | 14.87 | 0.0014 | 0.178 | 0.38 | 0.353 | 5.08  | 1.91  | 25.9  | 11.67 | 70.7  | 18.85 | 213.1 | 54.5  | 12290 | 0.41  | 106.8 | 15.2204 | 266.676 |
| ZB3-1-39 | 1859 | 187  | 11.2  | 305  | 1.47  | -    | 2.7   | 0.043  | 1.25  | 2.48 | 0.103 | 12.02 | 3.07  | 30.5  | 9.98  | 44.2  | 8.78  | 77.1  | 14.76 | 12060 | 0.561 | 100.8 | 76.0849 | 189.379 |
| ZB3-1-40 | 1856 | 927  | 15.9  | 1802 | 0.83  | -    | 1.4   | 0.078  | 1.19  | 4.27 | 0.047 | 30.8  | 11.51 | 155.6 | 61.8  | 290   | 58.9  | 511   | 97.6  | 12290 | 0.508 | 77.1  | 140.615 | 367.865 |
| ZB3-1-41 | 1818 | 418  | 28    | 760  | 1.63  | 0.02 | 10.4  | 0.21   | 2.98  | 5.11 | 0.175 | 26.4  | 7.74  | 84.6  | 25.9  | 107.9 | 19.32 | 156.1 | 29    | 11060 | 0.569 | 88.8  | 71.2257 | 184.549 |
| ZB3-1-42 | 1896 | 241  | 8.41  | 262  | 0.515 | -    | 0.93  | 0.084  | 1.32  | 5.81 | 0.092 | 29.5  | 6.63  | 41    | 8.17  | 23.35 | 3.39  | 22.1  | 3.5   | 12910 | 0.239 | 50.4  | 142.017 | 385.243 |
| ZB3-1-43 | 2535 | 147  | 4.1   | 425  | 1.73  | -    | 30.3  | 0.059  | 1.03  | 1.95 | 0.534 | 10.04 | 3.09  | 37.5  | 14    | 69.4  | 14.15 | 137   | 29.1  | 12350 | 0.664 | 140.4 | 140.814 | 229.491 |
| ZB3-1-44 | 2008 | 44   | 2.37  | 450  | 0.57  | 0.02 | 18.69 | 0.417  | 5.12  | 6.12 | 1.73  | 18.3  | 4.56  | 46.9  | 13.95 | 60.2  | 12.46 | 119   | 21.81 | 5930  | 0.21  | 119.4 | 125.308 | 299.473 |
| ZB3-1-45 | 314  | 147  | 4     | 1206 | 4.24  | 0.00 | 46.2  | 0.087  | 1.52  | 3.18 | 1.6   | 19.8  | 6.47  | 90.8  | 37.7  | 207.8 | 49    | 523   | 118.3 | 9650  | 1.01  | 188.7 | 11.2191 | 179.633 |
| ZB3-1-46 | 2530 | 223  | 3.5   | 778  | 2     | -    | 14.99 | 0.077  | 1.87  | 3.7  | 0.74  | 20.9  | 6.08  | 75.1  | 26    | 128.1 | 25.61 | 223.1 | 45    | 8980  | 0.533 | 64.8  | 78.194  | 129.361 |
| ZB3-1-47 | 2502 | 81   | 2.17  | 183  | 0.8   | -    | 20.39 | 0.0154 | 0.36  | 0.66 | 0.302 | 4.26  | 1.31  | 13.73 | 5.27  | 27.7  | 6.26  | 65.5  | 14.59 | 11520 | 0.448 | 75.8  | 86.7965 | 145.782 |
| ZB3-1-48 | 1997 | 446  | 11.5  | 766  | 1.43  | 0.04 | 5.21  | 0.188  | 3.15  | 6.74 | 0.52  | 27.8  | 8.02  | 80.2  | 24.7  | 109.6 | 21.11 | 175.7 | 32.6  | 13210 | 0.961 | 187.1 | 139.905 | 384.061 |
| ZB3-1-49 | 303  | 86   | 2.92  | 937  | 2.83  | -    | 40.8  | 0.03   | 0.56  | 1.06 | 0.79  | 10.57 | 4.18  | 60.4  | 27    | 163.2 | 41.5  | 453   | 113   | 10340 | 0.536 | 333   | 19.8054 | 321.39  |
| ZB3-1-50 | 310  | 531  | 7.26  | 3680 | 7.69  | 0.01 | 73.9  | 0.262  | 4.96  | 13.3 | 5.49  | 81.4  | 27.5  | 332   | 117.7 | 533   | 103.9 | 874   | 166.1 | 9400  | 1.174 | 400   | 24.1758 | 380.907 |
| ZB3-1-51 | 2515 | 198  | 4.49  | 517  | 1.75  | -    | 26.8  | 0.0245 | 0.6   | 1.45 | 0.286 | 8.75  | 3.16  | 38.2  | 15.09 | 77.8  | 19.03 | 190.7 | 40.5  | 12530 | 1.46  | 66.3  | 72.7195 | 122.993 |
| ZB3-1-52 | 2255 | 226  | 7.3   | 590  | 2.72  | -    | 13.55 | 0.028  | 0.94  | 1.6  | 0.079 | 10.9  | 3.79  | 48.3  | 19.54 | 96    | 19.3  | 191.1 | 37.7  | 11090 | 0.931 | 63.9  | 80.383  | 145.208 |
| ZB3-1-53 | 378  | 160  | 6     | 487  | 1.06  | -    | 15.23 | 0.043  | 0.77  | 1.58 | 0.412 | 8.2   | 2.96  | 35.3  | 14.81 | 82    | 19.8  | 200   | 45.6  | 9490  | 0.443 | 81.5  | 8.58695 | 121.425 |
| ZB3-1-54 | 378  | 219  | 4.24  | 715  | 2.72  | -    | 27.9  | 0.062  | 0.92  | 2.42 | 0.57  | 11.8  | 4.18  | 55.1  | 21.3  | 121.8 | 29    | 282   | 63.8  | 10800 | 0.988 | 111.2 | 11.9015 | 166.481 |
| ZB3-1-55 | 1850 | 1029 | 17.6  | 1878 | 1.41  | -    | 1.26  | 0.032  | 0.86  | 3.24 | 0.008 | 26.7  | 10.84 | 156.4 | 63.8  | 323   | 69.4  | 625   | 123.6 | 13390 | 0.771 | 67.7  | 150.996 | 408.46  |
| ZB3-1-57 | 1857 | 516  | 10.56 | 999  | 1.07  | 0.01 | 2.35  | 0.069  | 1.31  | 3.62 | 0.153 | 25.6  | 8.66  | 96.9  | 32.2  | 137.4 | 26.9  | 229   | 40.7  | 13350 | 0.815 | 84    | 206.009 | 541.28  |
| ZB3-1-58 | 1848 | 435  | 21.5  | 497  | 4.21  | -    | 5.85  | 0.137  | 2.96  | 6.84 | 0.114 | 35.2  | 8.8   | 70.3  | 16.76 | 52.4  | 8.02  | 53.8  | 8.47  | 14230 | 2.16  | 158.6 | 224.911 | 592.98  |
| ZB3-1-59 | 1862 | 238  | 24    | 232  | 0.93  | 0.01 | 7.12  | 0.211  | 3.2   | 6.09 | 0.134 | 19.2  | 4.33  | 32.2  | 7.03  | 23.1  | 3.39  | 25.2  | 3.75  | 13130 | 0.421 | 298   | 175.18  | 420.649 |
| ZB3-1-60 | 307  | 83   | 2.14  | 677  | 2.4   | -    | 20.12 | 0.0179 | 0.32  | 1.17 | 0.61  | 8.49  | 3.15  | 44.5  | 19.59 | 112   | 28.5  | 308   | 73.2  | 11410 | 0.934 | 129.5 | 13.3291 | 239.745 |
| ZB3-1-61 | 1879 | 398  | 5.86  | 753  | 1.18  | 0.04 | 2.9   | 0.197  | 1.62  | 2.61 | 0.286 | 13.7  | 5.12  | 64.1  | 24.6  | 117.2 | 24.6  | 213.1 | 41.8  | 11410 | 0.726 | 58.7  | 80.0813 | 212.905 |
| ZB3-1-62 | 1848 | 569  | 13.3  | 1461 | 0.99  | -    | 3.38  | 0.14   | 3.34  | 7.26 | 0.248 | 40.4  | 12.62 | 150.2 | 51.9  | 232.7 | 45.7  | 392   | 74.8  | 11050 | 0.452 | 123.1 | 110.019 | 267.053 |
| ZB3-1-63 | 1878 | 815  | 5.61  | 1438 | 0.84  | -    | 0.575 | 0.03   | 1.01  | 3.26 | 0.01  | 23.1  | 9.96  | 128   | 46    | 225   | 47.1  | 423   | 80.7  | 12730 | 0.602 | 43.6  | 200.115 | 556.721 |
| ZB3-1-64 | 2491 | 215  | 5.01  | 578  | 3.02  | -    | 42.2  | 0.063  | 1.07  | 2.67 | 0.78  | 15.41 | 4.28  | 49.3  | 17.39 | 86.9  | 19.58 | 201.5 | 42.5  | 10950 | 0.993 | 208.7 | 66.0423 | 75.1073 |

|          |      |     |       |      |       |      |       |        |      |      |       |       |       |       |       |       |       |       |       |       |       |       |         |         |
|----------|------|-----|-------|------|-------|------|-------|--------|------|------|-------|-------|-------|-------|-------|-------|-------|-------|-------|-------|-------|-------|---------|---------|
| ZB3-1-65 | 305  | 189 | 2.6   | 1443 | 2.42  | 0.02 | 50.1  | 0.253  | 4.47 | 7.41 | 2.93  | 34.4  | 9.82  | 121   | 45    | 226.6 | 49.7  | 494   | 109.8 | 10420 | 0.805 | 283   | 17.3554 | 284.752 |
| ZB3-1-66 | 2484 | 172 | 3.06  | 373  | 1.36  | 0.09 | 33.4  | 0.152  | 1.47 | 2.05 | 0.72  | 9     | 2.53  | 28.6  | 10.76 | 57.9  | 12.73 | 139.9 | 31.9  | 12070 | 0.562 | 251   | 166.21  | 325.137 |
| ZB3-1-67 | 2594 | 187 | 2.84  | 695  | 1.07  | 0.00 | 11.8  | 0.091  | 1.9  | 3.33 | 1.17  | 16.7  | 5.08  | 56.9  | 21.1  | 105.5 | 22.3  | 224   | 47    | 10220 | 0.482 | 66.1  | 94.5825 | 159.53  |
| ZB3-1-68 | 2521 | 69  | 8.27  | 124  | 0.49  | -    | 16.84 | 0.0096 | 0.3  | 0.61 | 0.172 | 2.55  | 0.756 | 9.73  | 3.47  | 18.81 | 4.54  | 47.9  | 10.95 | 11100 | 0.218 | 35.8  | 43.7029 | 73.8387 |
| ZB3-1-69 | 292  | 207 | 5.7   | 623  | 0.92  | 0.00 | 25    | 0.107  | 1.52 | 3.43 | 1.34  | 15.7  | 4.59  | 53.3  | 19.38 | 95.2  | 21.28 | 197.8 | 42.9  | 9010  | 0.252 | 83    | 5.88019 | 103.463 |
| ZB3-1-70 | 1859 | 282 | 15.6  | 683  | 2.4   | -    | 8.78  | 0.078  | 1.45 | 3.03 | 0.16  | 16.4  | 5.12  | 62.4  | 22.04 | 103.9 | 21.58 | 184.8 | 36.2  | 10600 | 0.776 | 56.4  | 52.0357 | 135.31  |
| ZB3-1-71 | 1856 | 426 | 15    | 874  | 3.98  | 0.00 | 11.54 | 0.218  | 3.58 | 6.32 | 0.203 | 29.1  | 8.69  | 92.4  | 30.3  | 129   | 24.16 | 202.4 | 37.5  | 10920 | 1.52  | 126.2 | 79.0071 | 195.101 |
| ZB3-1-72 | 2585 | 158 | 7.7   | 530  | 1.66  | -    | 45.3  | 0.103  | 1.21 | 2.7  | 0.8   | 13.6  | 3.71  | 44.3  | 17.2  | 80.2  | 19.2  | 179.9 | 37.7  | 11620 | 0.89  | 136.8 | 120.377 | 190.548 |
| ZB3-1-73 | 1840 | 329 | 20.9  | 377  | 0.82  | 0.02 | 1.77  | 0.155  | 1.88 | 4.59 | 0.165 | 17.7  | 4.98  | 43.3  | 12.2  | 42.4  | 7.67  | 63.2  | 11.2  | 12700 | 0.344 | 51.7  | 98.3932 | 267.951 |
| ZB3-1-74 | 306  | 88  | 3.07  | 631  | 2.28  | -    | 27.2  | 0.0184 | 0.55 | 0.97 | 0.455 | 7.38  | 2.49  | 37.5  | 17.24 | 107.7 | 30    | 343   | 87.5  | 10670 | 0.535 | 143.3 | 10.8257 | 184.116 |
| ZB3-1-75 | 1847 | 356 | 17.8  | 514  | 0.98  | -    | 1.79  | 0.077  | 1.15 | 3.31 | 0.047 | 18.5  | 5.37  | 55.7  | 16.18 | 64.6  | 12.28 | 107.1 | 19.3  | 12050 | 0.545 | 51.5  | 170.735 | 485.622 |
| ZB3-1-76 | 314  | 161 | 4.04  | 1295 | 7.67  | -    | 43.9  | 0.041  | 0.79 | 2.49 | 1.16  | 18    | 6.43  | 90.6  | 38.1  | 217.1 | 52.4  | 547   | 120.7 | 10980 | 1.68  | 220.7 | 16.0897 | 260.458 |
| ZB3-1-77 | 1891 | 397 | 8.18  | 907  | 3.56  | 0.00 | 3.85  | 0.042  | 0.51 | 1.9  | 0.068 | 13.97 | 5.36  | 73.5  | 29    | 146.5 | 31.9  | 283   | 54    | 12620 | 2.3   | 160.8 | 181.158 | 472.559 |
| ZB3-1-78 | 372  | 181 | 6.41  | 497  | 3.74  | -    | 30.2  | 0.0312 | 0.55 | 1.44 | 0.357 | 7.9   | 2.88  | 38.3  | 15.1  | 79.8  | 18.95 | 191.5 | 40.2  | 11980 | 1.111 | 182   | 16.8913 | 235.78  |
| ZB3-1-79 | 378  | 233 | 5.84  | 806  | 3.65  | -    | 36    | 0.085  | 1.16 | 2.45 | 0.64  | 14.1  | 4.63  | 60.7  | 25.3  | 133.6 | 32.4  | 313   | 68.5  | 10190 | 1.195 | 334   | 24.8199 | 315.536 |
| ZB3-1-80 | 1883 | 250 | 8.63  | 346  | 0.72  | 0.00 | 1.54  | 0.071  | 1.17 | 3.84 | 0.025 | 20    | 5.22  | 46.1  | 11.09 | 34.5  | 5.17  | 35.3  | 5.48  | 12240 | 0.318 | 43.1  | 90.9893 | 248.756 |
| ZB3-1-81 | 2521 | 171 | 5.48  | 646  | 1.52  | -    | 25.9  | 0.043  | 0.96 | 2.18 | 0.56  | 13.13 | 4.17  | 52.8  | 19.62 | 100.8 | 22.8  | 216.5 | 43.5  | 11640 | 0.814 | 144   | 107.336 | 174.877 |
| ZB3-1-82 | 313  | 90  | 3.39  | 782  | 2.57  | 0.04 | 38.4  | 0.046  | 0.6  | 1.5  | 0.76  | 9.09  | 3.47  | 50.7  | 23    | 132.6 | 33.5  | 363   | 89.7  | 9810  | 0.591 | 211.3 | 13.212  | 204.736 |
| ZB3-1-83 | 1853 | 675 | 13.7  | 1145 | 0.811 | 0.00 | 1.68  | 0.173  | 3.19 | 6.27 | 0.133 | 32.7  | 10.34 | 113.8 | 38.1  | 170.2 | 33    | 282   | 51.9  | 10880 | 0.385 | 75    | 65.3834 | 169.033 |
| ZB3-1-84 | 2526 | 178 | 5.71  | 682  | 1.19  | 0.01 | 23.9  | 0.204  | 3.51 | 5.66 | 1.23  | 22.8  | 5.95  | 61.8  | 21    | 99.9  | 20.7  | 193   | 38    | 10640 | 0.52  | 148.8 | 107.964 | 168.04  |
| ZB3-1-85 | 1839 | 203 | 10.01 | 1209 | 1.24  | 0.03 | 10.97 | 0.521  | 7.62 | 12.9 | 1.03  | 47.6  | 12.58 | 135.6 | 43.2  | 178.9 | 32.8  | 270.7 | 48.8  | 9820  | 0.573 | 147.8 | 83.1748 | 200.444 |
| ZB3-1-87 | 1893 | 796 | 7.6   | 1630 | 1.02  | 0.00 | 1.43  | 0.075  | 1.56 | 5.24 | 0.084 | 37.6  | 13.03 | 156   | 54.3  | 246   | 50.5  | 433   | 79.5  | 13070 | 0.588 | 106.3 | 237.935 | 653.722 |
| ZB3-1-88 | 1825 | 125 | 10.69 | 328  | 1.26  | -    | 6.74  | 0.038  | 0.6  | 1.42 | 0.067 | 7.06  | 2.48  | 30.6  | 11.27 | 51.7  | 10.78 | 94.6  | 18.25 | 10690 | 0.565 | 108.9 | 136.769 | 364.949 |
| ZB3-1-89 | 1850 | 340 | 17.1  | 649  | 2.2   | 0.00 | 6.21  | 0.0356 | 0.55 | 1.55 | 0.128 | 9.86  | 3.8   | 50.9  | 20.53 | 105   | 24.21 | 230.9 | 45.7  | 12300 | 1.69  | 53.6  | 173.585 | 490.832 |
| ZB3-1-90 | 2601 | 157 | 16.2  | 287  | 0.658 | -    | 24.9  | 0.053  | 0.92 | 2.01 | 0.489 | 9.47  | 2.66  | 28.3  | 9.46  | 41.2  | 8.25  | 75    | 14.7  | 10080 | 0.242 | 69.4  | 55.2027 | 84.134  |
| ZB3-1-91 | 303  | 270 | 4.72  | 1767 | 8.28  | -    | 128.5 | 0.118  | 2.33 | 5.4  | 1.53  | 36.7  | 12.57 | 156.8 | 59.3  | 284   | 60.5  | 538   | 102.6 | 9090  | 1.62  | 459   | 20.0003 | 285.474 |
| ZB3-1-92 | 309  | 316 | 3.55  | 1350 | 3.46  | -    | 40    | 0.069  | 1.35 | 3.72 | 1.56  | 25.5  | 8.65  | 114   | 44.6  | 225   | 50.1  | 476   | 101.2 | 10470 | 0.649 | 262   | 19.3038 | 317.389 |
| ZB3-1-93 | 2522 | 98  | 4.78  | 234  | 1.38  | -    | 13.5  | 0.0158 | 0.32 | 0.92 | 0.165 | 4.21  | 1.285 | 17    | 6.46  | 35.3  | 8.66  | 95.4  | 21.94 | 13040 | 1.429 | 105.9 | 226.646 | 420.81  |
| ZB3-1-94 | 290  | 131 | 4.43  | 662  | 2.01  | 0.00 | 31.6  | 0.109  | 1.78 | 2.76 | 1.24  | 12.95 | 4.28  | 51    | 19.72 | 101.1 | 23.14 | 231.6 | 49.9  | 10460 | 0.721 | 171.5 | 13.1981 | 241.672 |
| ZB3-1-95 | 1867 | 709 | 6.61  | 1219 | 0.83  | -    | 0.642 | 0.043  | 0.86 | 2.65 | 0.022 | 22.5  | 9.17  | 117.2 | 39.9  | 184.4 | 37.1  | 319   | 62.3  | 12280 | 0.525 | 41    | 165.905 | 453.412 |

|           |      |      |       |      |      |      |       |        |      |       |       |       |       |        |       |        |       |        |        |       |       |        |         |         |
|-----------|------|------|-------|------|------|------|-------|--------|------|-------|-------|-------|-------|--------|-------|--------|-------|--------|--------|-------|-------|--------|---------|---------|
| ZB3-1-96  | 1809 | 470  | 18.3  | 1062 | 9.92 | -    | 35.1  | 0.103  | 1.86 | 5.64  | 0.184 | 32.5  | 10.48 | 113.1  | 37    | 145.8  | 23.82 | 194.9  | 37.1   | 13280 | 1.43  | 145.7  | 45.6556 | 94.1607 |
| ZB3-1-97  | 369  | 275  | 10    | 826  | 3.27 | 0.00 | 36.6  | 0.123  | 1.91 | 3.13  | 0.62  | 17.3  | 5.36  | 69     | 25.7  | 134.7  | 31.8  | 304    | 64.5   | 10130 | 1.213 | 345    | 25.2823 | 329.536 |
| ZB3-1-98  | 1883 | 490  | 19.3  | 1047 | 1.53 | 0.06 | 4.72  | 0.334  | 3.8  | 6.14  | 0.58  | 27.1  | 8.25  | 95.9   | 36.1  | 162.5  | 32.6  | 284    | 55     | 11350 | 0.771 | 107.1  | 100.87  | 267.78  |
| ZB3-1-99  | 2497 | 213  | 4.93  | 618  | 1.67 | 0.00 | 24.4  | 0.047  | 0.94 | 1.76  | 0.277 | 11.62 | 4.01  | 48.2   | 19.04 | 97.4   | 21.7  | 204.9  | 43.4   | 11840 | 0.615 | 154.3  | 101.491 | 152.229 |
| ZB3-1-100 | 385  | 178  | 10.3  | 867  | 0.95 | -    | 13.82 | 0.169  | 2.72 | 4.4   | 1.02  | 22.6  | 6.19  | 77.5   | 27.9  | 140.1  | 29.3  | 280    | 56.9   | 9290  | 0.421 | 140.1  | 10.5236 | 131.565 |
| ZB3-1-101 | 2507 | 164  | 6.17  | 441  | 0.78 | -    | 11.06 | 0.0262 | 0.49 | 1.46  | 0.331 | 9.56  | 3.08  | 38.1   | 14.89 | 71.7   | 15.33 | 140.9  | 28     | 10280 | 0.348 | 16.67  | 16.8096 | 28.3531 |
| ZB3-1-102 | 2643 | 137  | 2.67  | 429  | 1    | 0.01 | 12.5  | 0.291  | 6.66 | 9.92  | 3.51  | 23.7  | 5.55  | 46.9   | 12.57 | 54     | 11.52 | 111.6  | 24.1   | 11400 | 0.509 | 71.2   | 135.775 | 234.311 |
| ZB3-1-103 | 1873 | 277  | 6.42  | 278  | 0.58 | -    | 0.264 | 0.0072 | 0.31 | 1.61  | 0.03  | 13.44 | 4.27  | 37.1   | 8.41  | 28.7   | 4.63  | 34.8   | 5.89   | 12990 | 0.434 | 12.5   | 174.328 | 490.902 |
| ZB3-1-104 | 1843 | 1079 | 15.4  | 2025 | 1.01 | -    | 2.61  | 0.099  | 1.69 | 6.05  | 0.101 | 38.1  | 14.26 | 179.4  | 70.3  | 332    | 65.5  | 592    | 110.8  | 11790 | 0.685 | 84     | 133.041 | 353.418 |
| ZB3-1-105 | 374  | 39   | 2.41  | 1407 | 6.83 | 0.01 | 69.5  | 0.04   | 0.58 | 1.1   | 0.666 | 10    | 4.23  | 68     | 35.8  | 235.1  | 64.2  | 746    | 175.4  | 10180 | 0.465 | 161.7  | 22.4621 | 333.635 |
| ZB3-1-106 | 1848 | 481  | 28.3  | 594  | 2.28 | 0.00 | 8.73  | 0.281  | 5.44 | 12.35 | 0.285 | 50.9  | 11.43 | 87.3   | 19.69 | 58     | 8.15  | 51.6   | 7.71   | 13010 | 0.853 | 111.4  | 65.015  | 160.404 |
| ZB3-1-107 | 371  | 55   | 2.29  | 260  | 1.27 | 0.06 | 16.66 | 0.037  | 0.31 | 0.4   | 0.204 | 3.22  | 1.27  | 16.89  | 7.52  | 43.9   | 11.7  | 134.2  | 37.3   | 12620 | 0.348 | 127.5  | 29.008  | 457.664 |
| ZB3-1-108 | 1967 | 193  | 23    | 394  | 1.62 | -    | 5.65  | 0.0237 | 0.42 | 1.26  | 0.071 | 6.58  | 2.64  | 32.4   | 13.08 | 67.9   | 14.4  | 136.3  | 27.1   | 10720 | 0.848 | 48.5   | 73.3904 | 177.896 |
| ZB3-1-110 | 1867 | 640  | 6.5   | 1046 | 0.75 | 0.03 | 0.686 | 0.053  | 0.76 | 2.91  | 0.034 | 23.9  | 9.17  | 101.1  | 34.4  | 156.1  | 31    | 269.3  | 52.3   | 12870 | 0.507 | 35.4   | 168.261 | 469.454 |
| ZB3-3-1   | 291  | 428  | 13.80 | 1656 | 3.03 | 0.02 | 33.78 | 0.13   | 2.73 | 5.13  | 1.90  | 28.70 | 9.88  | 134.00 | 54.20 | 275.30 | 59.70 | 547.00 | 117.50 | 8470  | 0.55  | 111.40 | 5.28    | 83.93   |
| ZB3-3-2   | 301  | 188  | 4.22  | 1271 | 6.38 | -    | 54.20 | 0.05   | 0.89 | 2.10  | 1.11  | 15.08 | 5.98  | 84.60  | 38.30 | 217.70 | 52.40 | 547.00 | 128.30 | 10230 | 1.16  | 199.40 | 12.47   | 204.71  |
| ZB3-3-3   | 170  | 131  | 4.30  | 964  | 5.54 | 0.09 | 36.41 | 0.06   | 0.78 | 1.94  | 1.21  | 13.29 | 4.95  | 66.80  | 28.31 | 152.10 | 36.75 | 377.40 | 90.70  | 10390 | 1.66  | 569.00 | 29.68   | 958.32  |
| ZB3-3-4   | 294  | 234  | 5.80  | 942  | 1.00 | -    | 19.80 | 0.13   | 2.31 | 3.64  | 1.29  | 18.20 | 6.06  | 76.80  | 29.60 | 148.90 | 33.80 | 321.00 | 68.30  | 9430  | 0.32  | 86.70  | 4.67    | 73.83   |
| ZB3-3-5   | 1868 | 1175 | 10.56 | 2380 | 0.97 | 0.00 | 1.67  | 0.13   | 2.66 | 6.58  | 0.12  | 43.90 | 16.18 | 208.20 | 79.20 | 373.00 | 71.10 | 610.00 | 116.40 | 11890 | 0.58  | 88.80  | 114.87  | 293.20  |
| ZB3-3-6   | 287  | 178  | 1.67  | 1019 | 3.24 | -    | 9.98  | 0.02   | 0.41 | 2.06  | 0.13  | 15.03 | 5.38  | 77.10  | 32.50 | 169.30 | 37.30 | 360.70 | 79.30  | 11640 | 1.34  | 120.30 | 14.88   | 298.77  |
| ZB3-3-7   | 1859 | 667  | 6.31  | 1327 | 1.03 | -    | 1.91  | 0.07   | 1.36 | 3.91  | 0.04  | 24.70 | 8.84  | 116.40 | 43.20 | 214.30 | 43.70 | 387.00 | 77.50  | 11990 | 0.68  | 83.30  | 119.36  | 320.27  |
| ZB3-3-8   | 284  | 198  | 3.15  | 832  | 1.93 | -    | 10.38 | 0.04   | 0.92 | 2.19  | 0.26  | 14.12 | 5.24  | 67.30  | 27.22 | 136.90 | 28.94 | 263.50 | 55.00  | 9470  | 0.60  | 66.00  | 5.92    | 114.13  |
| ZB3-3-9   | 282  | 243  | 6.16  | 1031 | 1.63 | -    | 11.59 | 0.07   | 1.30 | 2.15  | 0.92  | 16.20 | 5.47  | 76.40  | 32.40 | 173.70 | 38.80 | 374.00 | 81.60  | 8460  | 0.40  | 59.30  | 4.69    | 89.82   |
| ZB3-3-10  | 301  | 213  | 5.34  | 1074 | 4.82 | -    | 56.10 | 0.07   | 1.32 | 2.88  | 1.29  | 18.20 | 6.15  | 78.70  | 33.36 | 178.20 | 40.50 | 409.00 | 95.70  | 9760  | 1.28  | 350.40 | 16.25   | 239.65  |
| ZB3-3-11  | 1877 | 591  | 10.47 | 1055 | 0.77 | 0.01 | 1.75  | 0.06   | 1.31 | 2.87  | 0.05  | 20.50 | 7.26  | 91.20  | 34.83 | 162.30 | 33.09 | 288.40 | 57.70  | 12650 | 0.55  | 60.10  | 81.12   | 219.65  |
| ZB3-3-12  | 290  | 288  | 6.20  | 938  | 1.71 | 0.00 | 21.20 | 0.08   | 1.10 | 3.08  | 0.89  | 19.40 | 6.02  | 76.20  | 29.90 | 151.20 | 30.50 | 294.00 | 61.00  | 10520 | 0.87  | 141.20 | 9.35    | 156.48  |
| ZB3-3-13  | 287  | 465  | 6.47  | 2637 | 6.61 | 0.02 | 46.40 | 0.24   | 4.46 | 10.24 | 1.75  | 68.80 | 21.93 | 261.40 | 92.30 | 420.00 | 78.80 | 647.00 | 130.20 | 7320  | 1.10  | 510.00 | 21.29   | 321.99  |
| ZB3-3-14  | 285  | 540  | 7.25  | 2620 | 6.59 | -    | 53.40 | 0.21   | 3.42 | 9.03  | 2.90  | 58.20 | 18.62 | 234.60 | 88.30 | 415.00 | 84.90 | 748.00 | 149.10 | 8210  | 1.11  | 614.00 | 23.53   | 345.96  |
| ZB3-3-15  | 290  | 329  | 6.10  | 1144 | 1.78 | 0.03 | 15.40 | 0.10   | 1.65 | 3.28  | 0.66  | 18.50 | 6.90  | 94.90  | 37.30 | 198.00 | 45.50 | 409.00 | 88.60  | 9610  | 0.57  | 59.20  | 4.41    | 85.90   |

|          |      |      |       |      |       |      |        |      |       |       |      |        |       |        |        |         |        |         |        |       |      |        |        |        |
|----------|------|------|-------|------|-------|------|--------|------|-------|-------|------|--------|-------|--------|--------|---------|--------|---------|--------|-------|------|--------|--------|--------|
| ZB3-3-16 | 287  | 209  | 4.71  | 1017 | 3.40  | 0.05 | 47.30  | 0.18 | 1.87  | 2.74  | 0.84 | 17.10  | 5.97  | 77.30  | 31.30  | 164.60  | 37.60  | 377.00  | 82.50  | 10560 | 0.79 | 209.70 | 10.77  | 178.47 |
| ZB3-3-17 | 294  | 284  | 1.60  | 1159 | 4.33  | 0.09 | 21.82  | 0.11 | 1.01  | 2.32  | 0.16 | 19.40  | 7.37  | 93.60  | 38.30  | 193.20  | 40.40  | 370.00  | 74.70  | 10290 | 1.05 | 95.70  | 8.61   | 151.67 |
| ZB3-3-18 | 294  | 422  | 1.66  | 1150 | 2.59  | 0.05 | 9.92   | 0.05 | 1.01  | 1.84  | 0.27 | 16.30  | 6.25  | 85.10  | 35.70  | 189.10  | 43.90  | 431.00  | 93.90  | 12010 | 1.18 | 197.80 | 23.75  | 447.02 |
| ZB3-3-19 | 288  | 299  | 3.75  | 1576 | 3.62  | 0.00 | 19.43  | 0.08 | 1.40  | 4.09  | 0.96 | 24.70  | 8.96  | 118.50 | 50.40  | 265.40  | 58.30  | 548.00  | 115.60 | 8920  | 0.82 | 104.30 | 8.32   | 153.67 |
| ZB3-3-20 | 283  | 209  | 8.75  | 601  | 0.94  | -    | 13.40  | 0.04 | 1.13  | 2.00  | 0.55 | 12.00  | 3.91  | 47.90  | 18.59  | 95.80   | 20.83  | 199.30  | 43.80  | 8720  | 0.34 | 45.80  | 3.11   | 56.72  |
| ZB3-3-21 | 1846 | 266  | 13.00 | 777  | 2.73  | -    | 8.62   | 0.09 | 1.36  | 3.61  | 0.11 | 19.10  | 6.08  | 70.60  | 26.32  | 124.40  | 23.98  | 205.20  | 41.60  | 11050 | 1.05 | 76.30  | 62.42  | 155.91 |
| ZB3-3-22 | 287  | 332  | 5.98  | 1575 | 3.25  | 0.33 | 18.77  | 0.19 | 1.75  | 3.68  | 1.11 | 24.10  | 9.12  | 123.00 | 52.30  | 270.00  | 59.50  | 550.00  | 119.30 | 8610  | 0.67 | 86.80  | 7.20   | 137.29 |
| ZB3-3-23 | 289  | 304  | 7.36  | 1103 | 1.50  | -    | 6.71   | 0.05 | 0.98  | 2.86  | 0.76 | 21.50  | 7.10  | 91.70  | 37.50  | 183.50  | 38.30  | 348.00  | 69.40  | 8210  | 0.50 | 57.70  | 6.05   | 118.09 |
| ZB3-3-24 | 291  | 340  | 10.60 | 2633 | 2.83  | 0.67 | 16.64  | 0.59 | 8.26  | 12.69 | 3.43 | 69.60  | 21.51 | 257.30 | 92.30  | 414.00  | 81.90  | 712.00  | 144.40 | 8070  | 0.65 | 234.70 | 12.03  | 192.83 |
| ZB3-3-25 | 1851 | 298  | 13.40 | 440  | 4.75  | -    | 19.46  | 0.18 | 2.92  | 4.92  | 0.12 | 20.80  | 6.13  | 54.50  | 14.75  | 51.20   | 8.45   | 63.70   | 10.72  | 12950 | 2.24 | 378.60 | 162.43 | 360.37 |
| ZB3-3-26 | 282  | 305  | 7.60  | 2332 | 3.58  | 0.02 | 14.69  | 0.22 | 4.96  | 8.06  | 1.74 | 50.90  | 16.36 | 207.20 | 76.80  | 367.00  | 73.40  | 653.00  | 125.50 | 7800  | 0.70 | 117.60 | 7.56   | 136.86 |
| ZB3-3-27 | 291  | 187  | 3.65  | 816  | 2.13  | -    | 32.50  | 0.04 | 1.05  | 2.12  | 0.67 | 12.95  | 4.34  | 59.50  | 24.85  | 138.50  | 31.90  | 318.00  | 71.80  | 10000 | 0.59 | 111.70 | 6.82   | 117.18 |
| ZB3-3-28 | 289  | 438  | 5.07  | 6900 | 19.88 | 0.09 | 137.60 | 1.10 | 18.40 | 39.50 | 2.07 | 212.70 | 61.90 | 708.00 | 247.30 | 1064.00 | 197.70 | 1527.00 | 272.40 | 6930  | 2.27 | 497.00 | 26.91  | 448.24 |
| ZB3-3-29 | 294  | 295  | 8.40  | 1290 | 1.81  | 0.38 | 26.50  | 0.23 | 2.17  | 4.41  | 1.91 | 22.10  | 7.08  | 98.20  | 39.10  | 211.00  | 47.70  | 482.00  | 105.40 | 8140  | 0.34 | 87.40  | 4.78   | 80.43  |
| ZB3-3-30 | 2516 | 84   | 3.43  | 307  | 1.35  | -    | 32.30  | 0.03 | 0.50  | 1.03  | 0.51 | 6.45   | 1.94  | 23.00  | 8.93   | 47.50   | 11.25  | 115.70  | 26.86  | 11320 | 0.63 | 185.20 | 189.69 | 317.22 |
| ZB3-3-31 | 292  | 250  | 7.77  | 728  | 1.06  | -    | 11.85  | 0.04 | 0.99  | 1.92  | 0.50 | 12.98  | 4.50  | 57.90  | 23.76  | 122.90  | 26.94  | 261.80  | 58.70  | 8430  | 0.38 | 40.10  | 3.24   | 58.56  |
| ZB3-3-32 | 289  | 388  | 2.83  | 2224 | 1.07  | 0.01 | 10.93  | 0.23 | 4.04  | 8.14  | 1.79 | 46.60  | 15.74 | 193.60 | 76.50  | 371.00  | 78.40  | 703.00  | 146.20 | 9660  | 0.38 | 278.10 | 21.83  | 403.85 |
| ZB3-3-33 | 280  | 608  | 8.11  | 3480 | 6.78  | 0.03 | 53.80  | 0.41 | 7.68  | 17.30 | 2.71 | 103.80 | 30.70 | 352.00 | 124.30 | 542.00  | 102.30 | 838.00  | 161.60 | 6770  | 1.16 | 687.00 | 24.83  | 361.51 |
| ZB3-3-34 | 288  | 222  | 5.88  | 764  | 1.75  | -    | 14.31  | 0.06 | 0.79  | 2.11  | 0.43 | 14.50  | 4.97  | 62.70  | 25.08  | 130.00  | 27.30  | 242.80  | 51.80  | 9000  | 0.37 | 50.10  | 3.84   | 70.82  |
| ZB3-3-35 | 290  | 1017 | 1.65  | 2678 | 7.41  | -    | 15.22  | 0.02 | 0.85  | 3.02  | 0.31 | 34.30  | 14.62 | 217.00 | 89.20  | 471.00  | 98.80  | 905.00  | 186.60 | 12410 | 2.30 | 204.70 | 25.40  | 501.99 |
| ZB3-3-36 | 291  | 461  | 7.70  | 2216 | 4.60  | 0.00 | 36.90  | 0.24 | 4.18  | 9.25  | 1.57 | 59.10  | 18.84 | 222.90 | 81.50  | 346.00  | 68.60  | 575.00  | 113.90 | 7110  | 0.87 | 452.00 | 18.05  | 267.03 |
| ZB3-3-37 | 320  | 234  | 3.48  | 1393 | 8.01  | -    | 52.60  | 0.07 | 1.08  | 2.77  | 1.40 | 20.60  | 7.24  | 99.60  | 41.70  | 238.60  | 54.50  | 569.00  | 134.70 | 10510 | 2.05 | 376.00 | 28.56  | 459.33 |
| ZB3-3-38 | 1850 | 1173 | 8.71  | 2341 | 1.08  | -    | 1.25   | 0.06 | 1.64  | 4.91  | 0.11 | 40.00  | 15.04 | 204.10 | 77.50  | 377.00  | 77.70  | 666.00  | 133.90 | 11960 | 0.56 | 69.20  | 120.15 | 318.39 |
| ZB3-3-39 | 293  | 469  | 4.10  | 1141 | 1.78  | -    | 7.77   | 0.06 | 0.97  | 2.63  | 0.27 | 18.50  | 6.82  | 95.10  | 38.40  | 195.00  | 44.10  | 401.00  | 87.60  | 9230  | 0.70 | 81.00  | 8.96   | 167.94 |
| ZB3-3-40 | 291  | 298  | 5.41  | 1131 | 1.78  | 0.03 | 16.59  | 0.09 | 1.70  | 3.67  | 0.63 | 21.50  | 7.41  | 94.20  | 38.10  | 188.50  | 39.90  | 362.00  | 73.90  | 10810 | 0.58 | 136.40 | 10.61  | 191.07 |
| ZB3-3-41 | 314  | 229  | 4.19  | 1521 | 8.77  | -    | 43.60  | 0.08 | 1.08  | 3.09  | 1.61 | 21.60  | 7.69  | 106.10 | 45.80  | 255.00  | 60.80  | 640.00  | 140.30 | 10740 | 1.86 | 270.00 | 19.14  | 305.47 |
| ZB3-3-42 | 289  | 391  | 6.94  | 2155 | 2.33  | -    | 15.03  | 0.09 | 1.95  | 4.31  | 1.32 | 35.10  | 12.70 | 166.40 | 67.30  | 339.00  | 73.10  | 683.00  | 142.60 | 8880  | 0.43 | 242.00 | 16.06  | 283.91 |
| ZB3-3-43 | 288  | 270  | 1.63  | 1714 | 8.82  | -    | 21.80  | 0.06 | 1.31  | 3.89  | 0.37 | 25.10  | 9.44  | 136.50 | 56.10  | 284.90  | 62.50  | 578.00  | 121.20 | 10410 | 1.57 | 147.80 | 13.27  | 252.29 |
| ZB3-3-44 | 313  | 214  | 3.37  | 1207 | 2.60  | 0.04 | 32.10  | 0.20 | 2.84  | 4.46  | 1.81 | 22.90  | 7.05  | 90.90  | 34.70  | 192.60  | 45.20  | 472.00  | 110.40 | 9970  | 0.77 | 180.60 | 11.57  | 184.23 |
| ZB3-3-45 | 290  | 560  | 8.23  | 3970 | 4.15  | 0.11 | 99.30  | 0.84 | 13.70 | 23.30 | 6.34 | 107.60 | 32.70 | 382.00 | 135.30 | 648.00  | 128.40 | 1151.00 | 225.80 | 8580  | 0.71 | 412.00 | 16.12  | 227.22 |

|          |      |     |       |      |      |      |       |      |       |       |      |       |       |        |       |        |       |        |        |       |      |        |        |        |
|----------|------|-----|-------|------|------|------|-------|------|-------|-------|------|-------|-------|--------|-------|--------|-------|--------|--------|-------|------|--------|--------|--------|
| ZB3-3-47 | 2157 | 187 | 4.53  | 839  | 2.86 | 0.02 | 21.90 | 0.14 | 2.08  | 5.04  | 0.94 | 20.80 | 6.37  | 72.70  | 27.80 | 132.40 | 26.50 | 231.00 | 44.60  | 9650  | 0.85 | 167.70 | 119.36 | 220.90 |
| ZB3-3-48 | 301  | 265 | 2.98  | 1163 | 2.25 | 0.00 | 15.28 | 0.07 | 1.06  | 3.11  | 0.72 | 21.20 | 7.00  | 96.40  | 37.60 | 197.50 | 41.80 | 371.00 | 79.70  | 8630  | 0.56 | 90.30  | 6.90   | 119.60 |
| ZB3-3-49 | 1830 | 487 | 6.40  | 697  | 1.13 | -    | 0.90  | 0.02 | 0.48  | 2.33  | 0.02 | 17.80 | 6.05  | 67.80  | 22.60 | 99.00  | 21.70 | 207.00 | 39.50  | 14900 | 1.16 | 49.20  | 238.54 | 663.35 |
| ZB3-3-50 | 292  | 196 | 2.26  | 877  | 0.99 | 0.57 | 15.55 | 0.21 | 1.66  | 3.03  | 0.56 | 15.50 | 5.28  | 68.40  | 27.80 | 148.20 | 33.00 | 333.00 | 73.20  | 11130 | 0.45 | 200.20 | 17.75  | 331.17 |
| ZB3-3-51 | 1880 | 685 | 7.57  | 1053 | 0.57 | -    | 0.37  | 0.03 | 0.63  | 2.67  | 0.00 | 19.80 | 8.00  | 101.30 | 33.70 | 142.10 | 29.40 | 256.00 | 48.90  | 14480 | 0.66 | 25.29  | 273.17 | 759.37 |
| ZB3-3-52 | 1923 | 204 | 19.60 | 482  | 1.77 | -    | 12.14 | 0.10 | 1.61  | 2.85  | 0.37 | 12.60 | 3.52  | 41.90  | 15.56 | 74.60  | 16.25 | 146.60 | 30.50  | 9280  | 0.97 | 76.50  | 68.60  | 176.53 |
| ZB3-3-53 | 1854 | 515 | 7.95  | 912  | 1.09 | -    | 2.47  | 0.04 | 0.56  | 2.20  | 0.03 | 14.80 | 5.40  | 74.90  | 31.90 | 156.00 | 33.50 | 311.00 | 61.00  | 11830 | 0.78 | 60.20  | 107.15 | 282.78 |
| ZB3-3-54 | 289  | 86  | 0.89  | 633  | 0.74 | -    | 5.78  | 0.04 | 0.75  | 1.90  | 0.38 | 13.90 | 4.23  | 55.30  | 21.60 | 103.40 | 21.50 | 199.00 | 42.80  | 10140 | 0.31 | 40.30  | 4.76   | 92.56  |
| ZB3-3-55 | 287  | 297 | 12.30 | 1847 | 1.61 | 0.15 | 33.50 | 0.31 | 4.61  | 8.90  | 2.73 | 42.30 | 14.00 | 154.60 | 64.30 | 305.00 | 63.10 | 581.00 | 121.00 | 7740  | 0.38 | 119.90 | 6.32   | 97.29  |
| ZB3-3-56 | 298  | 153 | 3.43  | 593  | 2.19 | 0.08 | 35.30 | 0.11 | 1.36  | 1.82  | 1.08 | 12.81 | 3.81  | 48.50  | 18.33 | 96.40  | 21.30 | 212.50 | 46.40  | 10620 | 0.65 | 202.30 | 14.81  | 256.72 |
| ZB3-3-58 | 286  | 280 | 2.42  | 1263 | 3.69 | -    | 11.66 | 0.05 | 1.08  | 3.19  | 0.28 | 22.80 | 8.42  | 111.10 | 43.60 | 211.40 | 43.90 | 397.00 | 73.60  | 9380  | 0.98 | 89.80  | 8.37   | 162.05 |
| ZB3-3-59 | 304  | 136 | 3.45  | 410  | 0.54 | -    | 3.92  | 0.03 | 0.27  | 1.01  | 0.21 | 6.31  | 2.42  | 31.20  | 12.68 | 68.80  | 15.71 | 148.20 | 32.00  | 9440  | 0.21 | 57.00  | 6.67   | 124.02 |
| ZB3-3-60 | 2171 | 244 | 5.61  | 960  | 2.00 | -    | 16.71 | 0.11 | 1.72  | 3.80  | 0.22 | 21.50 | 6.97  | 87.90  | 31.20 | 156.80 | 32.70 | 275.00 | 52.70  | 10740 | 0.99 | 151.70 | 147.16 | 297.38 |
| ZB3-3-61 | 310  | 138 | 3.58  | 610  | 2.40 | 0.02 | 25.00 | 0.05 | 0.56  | 1.41  | 0.59 | 8.45  | 3.11  | 43.50  | 18.80 | 100.60 | 24.70 | 261.00 | 58.70  | 10880 | 0.74 | 97.60  | 8.80   | 153.41 |
| ZB3-3-62 | 294  | 151 | 1.71  | 1206 | 1.33 | 0.00 | 16.01 | 0.09 | 2.03  | 4.27  | 0.68 | 22.00 | 7.57  | 94.90  | 37.50 | 196.40 | 44.20 | 446.00 | 95.30  | 11490 | 0.60 | 297.00 | 26.02  | 480.81 |
| ZB3-3-63 | 288  | 298 | 2.14  | 2064 | 3.02 | 0.00 | 17.91 | 0.19 | 3.56  | 7.37  | 0.81 | 46.60 | 14.81 | 185.30 | 70.10 | 336.00 | 69.40 | 618.00 | 117.30 | 10170 | 0.75 | 97.40  | 7.81   | 146.90 |
| ZB3-3-64 | 301  | 122 | 6.07  | 597  | 1.09 | 0.03 | 30.90 | 0.25 | 3.75  | 5.76  | 2.48 | 21.90 | 5.17  | 56.30  | 19.50 | 91.10  | 17.20 | 157.00 | 32.70  | 9510  | 0.23 | 110.00 | 5.48   | 87.91  |
| ZB3-3-65 | 292  | 242 | 7.02  | 802  | 1.47 | -    | 13.30 | 0.04 | 0.82  | 2.17  | 0.50 | 12.56 | 4.58  | 63.70  | 25.70 | 133.20 | 30.40 | 293.00 | 61.90  | 8620  | 0.42 | 42.20  | 3.36   | 61.53  |
| ZB3-3-66 | 288  | 168 | 2.30  | 621  | 0.68 | -    | 8.69  | 0.05 | 0.63  | 1.76  | 0.63 | 9.70  | 3.50  | 46.50  | 20.10 | 100.50 | 24.50 | 254.00 | 55.80  | 10920 | 0.36 | 139.50 | 13.02  | 248.64 |
| ZB3-3-67 | 297  | 292 | 4.40  | 1686 | 1.31 | -    | 10.45 | 0.25 | 3.85  | 7.58  | 1.23 | 37.80 | 12.44 | 150.50 | 57.60 | 273.00 | 56.10 | 532.00 | 107.90 | 9010  | 0.42 | 194.80 | 16.33  | 297.90 |
| ZB3-3-68 | 311  | 147 | 3.22  | 823  | 4.09 | -    | 33.40 | 0.05 | 1.06  | 2.23  | 0.88 | 14.20 | 4.82  | 63.40  | 25.70 | 138.60 | 32.00 | 309.00 | 64.30  | 9400  | 1.07 | 115.20 | 10.08  | 178.11 |
| ZB3-3-69 | 308  | 250 | 3.17  | 867  | 2.47 | 0.00 | 30.10 | 0.06 | 0.93  | 1.99  | 1.17 | 13.40 | 4.68  | 62.50  | 25.40 | 145.90 | 35.80 | 381.00 | 89.40  | 10040 | 0.63 | 115.10 | 7.83   | 126.76 |
| ZB3-3-70 | 290  | 157 | 2.93  | 713  | 1.94 | -    | 13.08 | 0.03 | 0.71  | 1.40  | 0.45 | 9.00  | 3.60  | 50.20  | 21.80 | 119.90 | 30.30 | 312.00 | 73.10  | 10390 | 0.84 | 153.00 | 18.45  | 348.73 |
| ZB3-3-71 | 283  | 131 | 4.53  | 353  | 0.35 | -    | 3.13  | 0.03 | 0.45  | 0.75  | 0.46 | 6.41  | 2.10  | 27.30  | 10.78 | 58.00  | 13.23 | 122.60 | 26.90  | 8160  | 0.12 | 22.90  | 2.75   | 56.08  |
| ZB3-3-72 | 313  | 189 | 4.29  | 1643 | 9.30 | -    | 58.20 | 0.05 | 1.04  | 2.66  | 1.43 | 21.00 | 8.14  | 114.20 | 48.80 | 277.00 | 66.90 | 671.00 | 141.50 | 11160 | 1.92 | 255.00 | 24.85  | 426.32 |
| ZB3-3-73 | 288  | 434 | 5.99  | 2580 | 5.08 | 0.06 | 35.60 | 0.22 | 3.73  | 7.71  | 2.45 | 48.30 | 17.19 | 219.80 | 87.70 | 423.00 | 91.80 | 802.00 | 162.20 | 8120  | 0.88 | 154.30 | 9.88   | 172.26 |
| ZB3-3-74 | 1890 | 979 | 7.35  | 2519 | 1.63 | 0.05 | 5.18  | 0.45 | 6.60  | 13.40 | 0.06 | 65.80 | 21.28 | 246.00 | 84.80 | 398.00 | 77.70 | 635.00 | 117.40 | 11390 | 0.92 | 320.00 | 258.54 | 660.32 |
| ZB3-3-75 | 316  | 191 | 5.75  | 1014 | 8.38 | 0.17 | 51.40 | 0.52 | 4.69  | 4.59  | 1.92 | 25.00 | 6.83  | 76.60  | 29.50 | 158.60 | 37.70 | 394.00 | 89.30  | 11290 | 2.29 | 463.00 | 32.59  | 534.90 |
| ZB3-3-76 | 290  | 721 | 2.76  | 1743 | 3.48 | 7.36 | 51.30 | 2.84 | 15.50 | 9.06  | 0.69 | 35.40 | 11.11 | 150.70 | 59.30 | 283.00 | 62.50 | 563.00 | 111.70 | 8160  | 0.72 | 110.40 | 8.21   | 152.57 |
| ZB3-3-78 | 319  | 265 | 9.60  | 983  | 3.58 | 0.07 | 87.50 | 0.29 | 4.06  | 5.94  | 1.73 | 25.90 | 7.46  | 90.10  | 31.70 | 146.20 | 30.60 | 286.00 | 53.40  | 8430  | 0.99 | 380.00 | 14.89  | 190.77 |

|           |      |     |       |      |       |      |       |      |      |       |      |        |       |        |        |        |        |        |        |       |      |        |        |        |
|-----------|------|-----|-------|------|-------|------|-------|------|------|-------|------|--------|-------|--------|--------|--------|--------|--------|--------|-------|------|--------|--------|--------|
| ZB3-3-79  | 293  | 111 | 2.33  | 368  | 1.34  | -    | 6.38  | 0.02 | 0.35 | 0.98  | 0.24 | 6.46   | 2.32  | 30.20  | 11.93  | 63.00  | 13.74  | 129.20 | 28.00  | 11100 | 0.46 | 43.70  | 4.29   | 79.25  |
| ZB3-3-80  | 286  | 159 | 3.55  | 1151 | 4.55  | 0.12 | 33.00 | 0.11 | 1.34 | 3.37  | 0.85 | 16.20  | 6.04  | 82.10  | 36.00  | 193.00 | 46.10  | 445.00 | 97.30  | 10270 | 1.50 | 288.00 | 22.03  | 418.80 |
| ZB3-3-81  | 289  | 561 | 15.70 | 2236 | 4.98  | 0.02 | 56.30 | 0.24 | 4.01 | 8.65  | 5.80 | 51.60  | 16.93 | 202.20 | 75.20  | 351.00 | 71.30  | 608.00 | 124.10 | 8160  | 1.15 | 212.00 | 10.12  | 158.57 |
| ZB3-3-82  | 399  | 103 | 8.10  | 462  | 1.93  | -    | 28.60 | 0.04 | 0.70 | 1.67  | 0.49 | 8.14   | 2.74  | 34.30  | 13.50  | 74.10  | 16.80  | 169.80 | 37.60  | 9750  | 0.51 | 96.80  | 9.81   | 128.55 |
| ZB3-3-83  | 300  | 146 | 2.81  | 956  | 2.27  | -    | 29.20 | 0.11 | 1.63 | 3.25  | 1.48 | 17.10  | 5.49  | 74.30  | 29.80  | 157.50 | 37.00  | 387.00 | 85.20  | 10720 | 0.84 | 213.10 | 15.24  | 265.62 |
| ZB3-3-84  | 306  | 177 | 6.31  | 899  | 3.99  | 0.17 | 42.40 | 0.08 | 0.92 | 2.35  | 1.08 | 13.48  | 4.81  | 66.50  | 27.50  | 154.80 | 34.60  | 382.00 | 79.80  | 10090 | 1.05 | 259.00 | 12.54  | 183.41 |
| ZB3-3-85  | 282  | 381 | 11.89 | 1553 | 3.29  | 0.00 | 47.50 | 0.15 | 2.38 | 4.97  | 2.04 | 30.50  | 9.94  | 133.20 | 50.50  | 258.00 | 54.90  | 502.00 | 102.60 | 8110  | 0.53 | 113.10 | 5.75   | 97.46  |
| ZB3-3-86  | 289  | 331 | 9.70  | 1833 | 3.27  | 0.02 | 45.40 | 0.25 | 4.07 | 6.78  | 2.03 | 34.50  | 11.43 | 147.20 | 59.70  | 312.00 | 66.80  | 629.00 | 133.20 | 8460  | 0.59 | 127.70 | 6.77   | 112.99 |
| ZB3-3-87  | 374  | 142 | 5.19  | 468  | 1.54  | -    | 22.09 | 0.03 | 0.52 | 1.30  | 0.43 | 9.21   | 2.99  | 37.40  | 14.45  | 76.50  | 17.49  | 173.30 | 37.10  | 10000 | 0.53 | 99.50  | 9.26   | 127.83 |
| ZB3-3-88  | 1859 | 521 | 4.42  | 1111 | 0.94  | 0.00 | 2.40  | 0.09 | 1.58 | 4.40  | 0.04 | 25.10  | 8.69  | 103.00 | 36.70  | 166.90 | 35.30  | 289.00 | 55.70  | 12270 | 0.53 | 94.70  | 115.91 | 300.43 |
| ZB3-3-89  | 286  | 391 | 3.62  | 2418 | 5.88  | 0.01 | 41.20 | 0.20 | 4.15 | 8.09  | 0.89 | 54.40  | 17.28 | 220.80 | 85.60  | 398.00 | 79.10  | 686.00 | 129.70 | 9080  | 1.21 | 181.00 | 12.76  | 232.38 |
| ZB3-3-91  | 1875 | 276 | 11.73 | 630  | 1.65  | 0.00 | 4.57  | 0.03 | 0.76 | 1.76  | 0.05 | 10.35  | 4.04  | 54.00  | 20.47  | 104.50 | 23.02  | 206.20 | 38.50  | 10240 | 0.71 | 58.70  | 85.97  | 232.26 |
| ZB3-3-92  | 312  | 134 | 3.60  | 472  | 1.10  | -    | 14.50 | 0.03 | 0.74 | 1.32  | 0.57 | 7.30   | 2.85  | 37.90  | 14.90  | 76.40  | 18.60  | 198.00 | 44.90  | 10300 | 0.55 | 60.90  | 5.22   | 93.34  |
| ZB3-3-93  | 1841 | 174 | 21.60 | 351  | 1.24  | 0.01 | 14.37 | 0.13 | 2.08 | 2.79  | 0.47 | 10.27  | 3.02  | 35.40  | 11.83  | 53.00  | 10.55  | 93.00  | 18.12  | 10010 | 0.41 | 69.00  | 41.83  | 102.56 |
| ZB3-3-94  | 381  | 188 | 5.67  | 540  | 2.60  | -    | 28.30 | 0.05 | 0.98 | 1.80  | 0.38 | 9.27   | 3.28  | 41.40  | 16.43  | 88.00  | 20.59  | 207.50 | 45.30  | 11140 | 0.94 | 212.10 | 18.72  | 246.92 |
| ZB3-3-95  | 290  | 200 | 3.13  | 753  | 3.26  | 0.04 | 21.00 | 0.07 | 1.04 | 2.44  | 0.38 | 14.43  | 5.05  | 66.60  | 25.40  | 128.60 | 27.40  | 246.30 | 49.90  | 10260 | 0.94 | 126.70 | 10.22  | 187.10 |
| ZB3-3-96  | 293  | 186 | 11.61 | 474  | 1.10  | -    | 22.90 | 0.04 | 1.02 | 2.18  | 0.44 | 10.95  | 3.48  | 40.80  | 15.24  | 73.50  | 16.30  | 143.50 | 30.00  | 9350  | 0.41 | 69.50  | 4.66   | 81.47  |
| ZB3-3-97  | 290  | 382 | 5.48  | 1946 | 3.22  | -    | 19.07 | 0.11 | 2.69 | 6.04  | 1.10 | 38.10  | 13.05 | 173.30 | 66.20  | 319.00 | 68.50  | 599.00 | 115.00 | 8700  | 0.81 | 200.00 | 11.79  | 201.89 |
| ZB3-3-98  | 286  | 325 | 9.70  | 1186 | 2.78  | 0.00 | 32.70 | 0.11 | 1.80 | 3.27  | 0.99 | 19.50  | 6.69  | 90.10  | 37.20  | 203.60 | 48.10  | 464.00 | 102.90 | 8590  | 0.58 | 72.20  | 4.68   | 83.41  |
| ZB3-3-99  | 285  | 316 | 10.40 | 1751 | 1.48  | -    | 7.19  | 0.12 | 1.57 | 4.02  | 1.61 | 31.60  | 11.07 | 141.20 | 56.10  | 280.00 | 61.30  | 564.00 | 122.00 | 7110  | 0.31 | 143.60 | 11.63  | 220.65 |
| ZB3-3-100 | 311  | 163 | 3.42  | 769  | 1.51  | 0.03 | 11.71 | 0.08 | 1.24 | 2.21  | 0.55 | 11.51  | 4.22  | 56.70  | 23.60  | 129.10 | 31.70  | 312.00 | 69.70  | 10430 | 0.61 | 141.60 | 16.82  | 308.52 |
| ZB3-3-101 | 291  | 342 | 2.39  | 4400 | 30.60 | 0.01 | 95.80 | 0.20 | 3.57 | 13.17 | 0.11 | 104.80 | 35.60 | 450.00 | 158.40 | 671.00 | 126.60 | 980.00 | 171.80 | 8290  | 3.94 | 357.00 | 24.65  | 435.21 |
| ZB3-3-102 | 299  | 249 | 3.35  | 1349 | 4.16  | 0.04 | 28.30 | 0.10 | 2.22 | 4.25  | 0.90 | 26.60  | 8.72  | 112.80 | 45.80  | 229.20 | 49.40  | 449.00 | 88.60  | 9950  | 0.92 | 129.20 | 8.62   | 148.06 |
| ZB3-3-103 | 2516 | 295 | 8.41  | 723  | 2.45  | -    | 18.88 | 0.08 | 1.53 | 3.26  | 0.20 | 18.70  | 6.01  | 68.60  | 23.24  | 111.90 | 22.87  | 191.30 | 36.80  | 11170 | 0.93 | 68.90  | 70.25  | 118.40 |
| ZB3-3-104 | 2041 | 430 | 23.20 | 2315 | 1.62  | 0.07 | 5.98  | 0.66 | 8.93 | 13.40 | 0.67 | 72.10  | 21.53 | 241.00 | 84.40  | 371.00 | 67.60  | 554.00 | 96.70  | 9430  | 0.67 | 249.00 | 226.10 | 513.46 |
| ZB3-3-105 | 2529 | 173 | 9.19  | 486  | 1.15  | 0.00 | 14.10 | 0.15 | 2.06 | 2.75  | 0.38 | 13.47  | 3.62  | 43.20  | 15.39  | 75.40  | 16.08  | 152.00 | 30.70  | 9750  | 0.74 | 162.20 | 140.67 | 230.35 |
| ZB3-3-106 | 291  | 302 | 6.93  | 1558 | 1.83  | 0.03 | 32.80 | 0.26 | 4.60 | 6.55  | 2.64 | 32.60  | 10.40 | 130.70 | 50.80  | 259.00 | 55.20  | 539.00 | 117.00 | 7920  | 0.37 | 110.60 | 5.71   | 93.30  |
| ZB3-3-107 | 282  | 269 | 5.76  | 983  | 2.87  | 0.02 | 17.90 | 0.08 | 1.37 | 3.63  | 0.44 | 18.70  | 6.12  | 85.60  | 33.60  | 159.00 | 36.30  | 324.00 | 66.60  | 9770  | 0.79 | 85.20  | 7.02   | 134.10 |
| ZB3-3-108 | 302  | 340 | 4.88  | 1873 | 6.19  | -    | 40.00 | 0.15 | 3.34 | 7.73  | 1.00 | 48.00  | 15.20 | 180.20 | 65.00  | 303.00 | 57.10  | 499.00 | 97.50  | 7760  | 0.94 | 286.00 | 13.28  | 194.49 |

|           |      |     |       |      |       |      |       |      |       |       |      |        |       |        |        |        |        |         |        |       |      |        |        |        |
|-----------|------|-----|-------|------|-------|------|-------|------|-------|-------|------|--------|-------|--------|--------|--------|--------|---------|--------|-------|------|--------|--------|--------|
| ZB3-3-110 | 286  | 157 | 3.81  | 589  | 1.30  | 0.00 | 11.75 | 0.02 | 0.41  | 1.41  | 0.28 | 8.69   | 3.11  | 43.80  | 18.25  | 98.20  | 23.76  | 233.40  | 51.10  | 11320 | 0.56 | 76.10  | 7.85   | 153.03 |
| ZB4-2-1   | 304  | 156 | 3.14  | 799  | 3.88  | -    | 32.10 | 0.04 | 0.74  | 2.01  | 0.92 | 11.70  | 4.28  | 56.50  | 25.02  | 137.50 | 33.50  | 355.00  | 79.60  | 10640 | 1.08 | 182.00 | 11.81  | 193.85 |
| ZB4-2-3   | 294  | 147 | 7.60  | 510  | 1.23  | 0.07 | 7.95  | 0.04 | 0.61  | 1.26  | 0.24 | 8.55   | 2.86  | 37.80  | 15.16  | 85.80  | 19.45  | 194.00  | 43.10  | 9360  | 0.63 | 90.50  | 11.09  | 215.20 |
| ZB4-2-4   | 296  | 163 | 3.79  | 720  | 1.50  | -    | 12.76 | 0.05 | 1.08  | 2.13  | 0.45 | 13.50  | 4.68  | 54.40  | 22.32  | 115.90 | 26.80  | 249.00  | 53.10  | 10960 | 0.71 | 157.50 | 14.93  | 280.93 |
| ZB4-2-5   | 290  | 290 | 5.34  | 1686 | 3.13  | -    | 30.40 | 0.09 | 1.27  | 3.57  | 1.36 | 23.20  | 9.23  | 126.30 | 54.50  | 283.00 | 65.10  | 623.00  | 132.30 | 6940  | 0.51 | 192.40 | 13.56  | 248.45 |
| ZB4-2-6   | 291  | 319 | 2.74  | 2830 | 12.47 | 0.00 | 90.30 | 0.19 | 3.50  | 9.37  | 0.36 | 64.20  | 22.40 | 278.00 | 97.30  | 447.00 | 88.30  | 709.00  | 130.80 | 7100  | 2.26 | 309.10 | 20.06  | 355.37 |
| ZB4-2-7   | 296  | 292 | 5.80  | 1300 | 2.66  | 0.00 | 55.70 | 0.12 | 1.84  | 4.30  | 1.81 | 25.10  | 7.75  | 110.60 | 41.80  | 206.00 | 44.80  | 421.00  | 90.50  | 7830  | 0.57 | 352.00 | 13.76  | 199.07 |
| ZB4-2-8   | 297  | 261 | 3.30  | 768  | 3.88  | 4.19 | 55.00 | 0.73 | 2.61  | 0.89  | 0.58 | 7.60   | 3.25  | 47.30  | 22.20  | 135.00 | 36.30  | 398.00  | 99.40  | 10190 | 0.71 | 120.90 | 7.90   | 144.18 |
| ZB4-2-9   | 298  | 345 | 12.00 | 1600 | 2.85  | -    | 28.00 | 0.12 | 1.96  | 4.00  | 2.40 | 25.40  | 9.71  | 130.90 | 53.90  | 265.00 | 59.00  | 543.00  | 118.90 | 6930  | 0.57 | 117.80 | 6.99   | 114.77 |
| ZB4-2-10  | 291  | 179 | 9.20  | 583  | 0.90  | -    | 4.89  | 0.05 | 1.13  | 2.60  | 0.40 | 12.20  | 3.86  | 50.50  | 17.60  | 94.20  | 19.20  | 180.00  | 36.10  | 8340  | 0.29 | 55.20  | 5.60   | 110.60 |
| ZB4-2-11  | 1842 | 155 | 4.89  | 295  | 3.04  | 0.07 | 8.12  | 0.08 | 1.18  | 2.24  | 0.10 | 11.76  | 3.74  | 36.50  | 9.74   | 32.00  | 4.85   | 35.00   | 5.69   | 12930 | 3.12 | 211.40 | 197.96 | 502.99 |
| ZB4-2-12  | 1867 | 381 | 9.50  | 743  | 0.87  | 0.04 | 2.07  | 0.08 | 0.99  | 3.28  | 0.09 | 18.70  | 6.26  | 73.30  | 23.70  | 104.10 | 19.90  | 158.50  | 30.80  | 12180 | 0.47 | 57.00  | 130.23 | 330.47 |
| ZB4-2-13  | 291  | 153 | 3.00  | 824  | 3.05  | -    | 15.10 | 0.05 | 0.88  | 2.65  | 0.30 | 14.20  | 5.18  | 63.20  | 26.00  | 134.00 | 30.00  | 320.00  | 61.80  | 9630  | 1.20 | 249.00 | 23.77  | 470.27 |
| ZB4-2-15  | 301  | 309 | 2.82  | 1523 | 8.55  | -    | 37.00 | 0.06 | 1.07  | 2.35  | 0.49 | 19.50  | 7.38  | 107.70 | 46.20  | 275.00 | 62.40  | 630.00  | 139.80 | 10130 | 1.84 | 197.30 | 18.32  | 330.01 |
| ZB4-2-17  | 294  | 259 | 5.90  | 2550 | 7.95  | 0.40 | 39.90 | 0.36 | 4.70  | 11.61 | 1.67 | 68.30  | 21.69 | 261.00 | 93.80  | 418.00 | 78.80  | 655.00  | 125.40 | 6830  | 1.59 | 344.00 | 18.39  | 297.47 |
| ZB4-2-19  | 294  | 226 | 7.39  | 840  | 1.24  | -    | 11.27 | 0.06 | 1.07  | 2.30  | 0.41 | 15.60  | 5.56  | 70.70  | 27.30  | 131.30 | 28.70  | 253.00  | 51.40  | 10030 | 0.49 | 154.10 | 12.55  | 228.71 |
| ZB4-2-20  | 294  | 323 | 5.97  | 932  | 1.40  | 0.20 | 13.34 | 0.11 | 0.74  | 2.21  | 0.36 | 14.45  | 5.36  | 72.20  | 28.93  | 153.80 | 33.10  | 317.00  | 66.10  | 10030 | 0.57 | 69.20  | 5.70   | 104.68 |
| ZB4-2-21  | 295  | 151 | 4.71  | 1132 | 0.45  | -    | 4.26  | 0.21 | 3.58  | 5.01  | 1.74 | 30.50  | 9.43  | 105.90 | 39.50  | 185.00 | 36.00  | 324.00  | 65.30  | 7840  | 0.15 | 64.10  | 5.53   | 101.34 |
| ZB4-2-22  | 1803 | 99  | 8.50  | 363  | 4.60  | 0.04 | 12.71 | 0.10 | 1.54  | 2.01  | 0.13 | 8.05   | 2.62  | 33.30  | 12.45  | 58.60  | 12.32  | 108.00  | 21.42  | 10710 | 2.01 | 106.90 | 133.10 | 364.17 |
| ZB4-2-23  | 2477 | 169 | 4.42  | 439  | 2.52  | -    | 32.40 | 0.05 | 0.69  | 1.81  | 0.25 | 9.42   | 2.82  | 34.20  | 13.20  | 67.30  | 15.81  | 153.90  | 34.40  | 12330 | 1.80 | 118.50 | 324.29 | 597.14 |
| ZB4-2-24  | 302  | 181 | 3.16  | 1474 | 5.78  | -    | 46.90 | 0.12 | 1.79  | 3.69  | 2.03 | 24.40  | 7.77  | 110.10 | 42.90  | 233.00 | 57.60  | 600.00  | 129.70 | 10090 | 1.36 | 217.20 | 13.33  | 219.58 |
| ZB4-2-25  | 315  | 192 | 3.70  | 1294 | 5.26  | 0.01 | 31.20 | 0.07 | 1.41  | 3.22  | 1.67 | 25.00  | 7.99  | 102.50 | 38.50  | 199.40 | 42.50  | 412.00  | 96.40  | 11500 | 0.90 | 265.00 | 19.28  | 311.27 |
| ZB4-2-26  | 288  | 349 | 2.62  | 5330 | 5.27  | 2.52 | 40.80 | 1.67 | 19.20 | 32.80 | 3.88 | 157.00 | 48.30 | 551.00 | 194.00 | 820.00 | 147.00 | 1234.00 | 235.00 | 6640  | 0.81 | 225.00 | 12.83  | 222.99 |
| ZB4-2-27  | 308  | 180 | 4.50  | 677  | 1.46  | -    | 11.90 | 0.03 | 1.13  | 1.56  | 0.32 | 12.60  | 4.10  | 59.30  | 19.80  | 111.70 | 25.50  | 221.00  | 50.50  | 10250 | 0.72 | 183.00 | 16.85  | 313.43 |
| ZB4-2-28  | 292  | 245 | 4.29  | 1202 | 2.28  | 0.00 | 16.20 | 0.09 | 1.80  | 4.38  | 0.95 | 21.30  | 6.99  | 92.20  | 36.80  | 188.00 | 42.30  | 401.00  | 89.20  | 9080  | 0.85 | 335.00 | 27.64  | 511.25 |
| ZB4-2-30  | 2549 | 190 | 2.84  | 990  | 2.59  | -    | 9.97  | 0.07 | 1.48  | 3.52  | 0.44 | 21.60  | 7.26  | 90.20  | 34.10  | 163.80 | 32.50  | 280.00  | 53.40  | 8590  | 0.83 | 83.90  | 107.39 | 185.38 |
| ZB4-2-31  | 296  | 151 | 2.87  | 814  | 2.61  | -    | 14.16 | 0.03 | 0.93  | 2.10  | 0.41 | 12.10  | 4.53  | 61.50  | 24.94  | 134.00 | 31.80  | 331.00  | 75.30  | 9750  | 1.09 | 209.20 | 22.73  | 432.98 |
| ZB4-2-34  | 1847 | 940 | 22.50 | 1655 | 1.52  | 0.01 | 2.58  | 0.15 | 2.67  | 4.97  | 0.17 | 28.80  | 10.61 | 141.50 | 56.90  | 294.00 | 63.40  | 567.00  | 108.70 | 9990  | 0.70 | 75.00  | 58.94  | 148.42 |
| ZB4-2-35  | 323  | 217 | 2.31  | 1370 | 7.01  | -    | 29.90 | 0.03 | 0.93  | 3.07  | 1.33 | 16.90  | 6.41  | 92.50  | 38.20  | 232.00 | 58.10  | 606.00  | 137.00 | 10720 | 1.62 | 183.00 | 25.84  | 485.87 |

|          |      |      |       |      |      |      |       |      |      |       |      |       |       |        |        |        |       |        |        |       |      |        |        |        |
|----------|------|------|-------|------|------|------|-------|------|------|-------|------|-------|-------|--------|--------|--------|-------|--------|--------|-------|------|--------|--------|--------|
| ZB4-2-36 | 288  | 233  | 4.50  | 782  | 2.69 | 0.14 | 48.40 | 0.14 | 2.16 | 3.09  | 1.69 | 16.70 | 5.10  | 61.80  | 23.60  | 121.00 | 28.00 | 264.00 | 58.00  | 10300 | 0.83 | 403.00 | 23.27  | 394.68 |
| ZB4-2-37 | 1873 | 507  | 12.60 | 1821 | 1.22 | 0.07 | 7.07  | 0.60 | 9.13 | 13.50 | 0.36 | 57.00 | 17.54 | 179.60 | 64.30  | 275.00 | 52.60 | 437.00 | 82.50  | 10010 | 0.59 | 210.70 | 126.25 | 309.06 |
| ZB4-2-38 | 369  | 203  | 6.80  | 475  | 1.64 | 0.08 | 23.90 | 0.03 | 1.18 | 1.86  | 0.45 | 10.20 | 2.76  | 37.90  | 14.40  | 78.40  | 17.30 | 185.00 | 39.00  | 10560 | 0.67 | 172.00 | 14.03  | 182.68 |
| ZB4-2-39 | 288  | 333  | 20.60 | 1329 | 2.05 | 0.04 | 36.60 | 0.35 | 5.09 | 7.19  | 1.49 | 36.10 | 11.50 | 124.60 | 43.50  | 197.00 | 38.30 | 332.00 | 61.80  | 8470  | 0.67 | 487.00 | 19.69  | 286.04 |
| ZB4-2-40 | 2674 | 187  | 4.68  | 620  | 1.16 | -    | 11.22 | 0.04 | 0.87 | 1.86  | 0.47 | 11.97 | 4.17  | 54.10  | 20.64  | 98.40  | 20.15 | 179.40 | 37.00  | 10090 | 0.48 | 50.90  | 44.05  | 67.21  |
| ZB4-2-41 | 372  | 56   | 2.78  | 1830 | 6.77 | 0.05 | 84.30 | 0.10 | 1.11 | 2.45  | 1.48 | 17.30 | 6.58  | 94.00  | 46.60  | 280.00 | 73.20 | 844.00 | 180.00 | 9610  | 0.46 | 274.00 | 25.12  | 361.21 |
| ZB4-2-42 | 2503 | 108  | 8.33  | 324  | 1.03 | -    | 5.42  | -    | 0.22 | 0.48  | 0.30 | 4.33  | 1.62  | 23.20  | 9.43   | 51.60  | 12.34 | 135.20 | 30.10  | 13460 | 1.11 | 26.83  | 204.90 | 390.39 |
| ZB4-2-43 | 289  | 319  | 5.10  | 1483 | 7.71 | 0.23 | 81.30 | 0.18 | 1.97 | 4.36  | 1.13 | 25.00 | 8.71  | 118.80 | 47.90  | 248.00 | 56.60 | 540.00 | 117.90 | 10270 | 1.43 | 355.00 | 15.63  | 245.11 |
| ZB4-2-44 | 292  | 367  | 10.80 | 1405 | 3.74 | -    | 5.04  | 0.09 | 1.22 | 4.01  | 0.18 | 24.90 | 9.00  | 116.80 | 46.90  | 232.00 | 48.10 | 434.00 | 85.70  | 10320 | 1.46 | 259.00 | 32.42  | 664.70 |
| ZB4-2-45 | 290  | 288  | 5.78  | 1466 | 4.24 | 0.08 | 65.50 | 0.13 | 2.23 | 4.98  | 1.29 | 28.80 | 9.86  | 123.70 | 47.10  | 239.80 | 52.10 | 458.00 | 91.00  | 9890  | 1.12 | 131.60 | 7.15   | 116.98 |
| ZB4-2-47 | 287  | 225  | 6.90  | 1287 | 2.01 | -    | 8.00  | 0.05 | 1.62 | 4.10  | 0.71 | 23.40 | 7.96  | 105.00 | 42.90  | 222.00 | 46.50 | 477.00 | 85.80  | 7810  | 0.55 | 146.00 | 12.81  | 258.53 |
| ZB4-2-48 | 2008 | 1619 | 13.20 | 2820 | 1.06 | -    | 1.54  | 0.20 | 4.36 | 10.87 | 0.13 | 68.80 | 22.14 | 271.00 | 94.60  | 429.00 | 88.20 | 713.00 | 137.40 | 11010 | 0.53 | 70.50  | 137.19 | 346.90 |
| ZB4-2-49 | 307  | 264  | 5.00  | 856  | 1.46 | 0.01 | 26.10 | 0.13 | 2.22 | 3.46  | 1.05 | 15.40 | 4.64  | 64.00  | 26.90  | 121.00 | 29.10 | 303.00 | 67.70  | 9760  | 0.49 | 112.90 | 8.67   | 155.43 |
| ZB4-2-50 | 300  | 130  | 3.06  | 649  | 2.79 | 0.03 | 31.90 | 0.08 | 1.06 | 2.13  | 0.70 | 11.06 | 3.48  | 48.50  | 19.29  | 107.60 | 27.20 | 294.00 | 70.00  | 10970 | 0.70 | 400.00 | 31.29  | 552.76 |
| ZB4-2-52 | 287  | 277  | 2.76  | 1953 | 5.20 | 0.02 | 51.40 | 0.23 | 4.10 | 7.94  | 1.70 | 42.30 | 13.83 | 172.50 | 65.90  | 325.00 | 72.70 | 652.00 | 131.80 | 9410  | 1.10 | 253.80 | 15.72  | 275.50 |
| ZB4-2-53 | 2512 | 123  | 2.78  | 354  | 1.33 | 0.09 | 38.60 | 0.10 | 1.17 | 1.51  | 0.73 | 8.40  | 2.56  | 29.10  | 9.56   | 53.10  | 11.44 | 127.00 | 25.20  | 10620 | 0.59 | 199.00 | 182.88 | 322.54 |
| ZB4-2-54 | 319  | 206  | 5.28  | 863  | 3.61 | -    | 39.50 | 0.09 | 1.37 | 2.57  | 1.23 | 17.50 | 5.73  | 72.90  | 28.40  | 138.80 | 31.30 | 302.00 | 60.50  | 10710 | 1.01 | 236.00 | 12.11  | 180.13 |
| ZB4-2-55 | 322  | 285  | 3.40  | 1110 | 3.17 | -    | 41.30 | 0.07 | 1.68 | 2.82  | 1.20 | 16.40 | 6.36  | 77.80  | 36.30  | 192.00 | 46.20 | 476.00 | 105.80 | 8910  | 0.78 | 184.00 | 10.54  | 163.56 |
| ZB4-2-56 | 2545 | 207  | 5.52  | 791  | 1.65 | -    | 16.00 | 0.08 | 1.23 | 2.76  | 1.22 | 15.60 | 4.85  | 63.30  | 25.00  | 133.20 | 28.30 | 269.00 | 57.10  | 10130 | 0.53 | 49.90  | 70.39  | 116.17 |
| ZB4-2-57 | 2522 | 164  | 5.37  | 418  | 1.82 | 0.02 | 38.50 | 0.17 | 2.11 | 3.90  | 1.09 | 14.70 | 3.64  | 41.30  | 12.41  | 56.00  | 11.51 | 110.10 | 21.68  | 11040 | 0.87 | 276.00 | 175.86 | 279.98 |
| ZB4-2-58 | 299  | 130  | 3.56  | 1227 | 2.82 | 0.33 | 35.60 | 0.17 | 2.01 | 4.47  | 1.86 | 21.10 | 7.03  | 89.60  | 36.30  | 189.20 | 45.30 | 479.00 | 105.50 | 10860 | 0.77 | 325.00 | 22.13  | 385.43 |
| ZB4-2-59 | 291  | 380  | 1.59  | 2060 | 7.90 | 0.02 | 24.30 | 0.13 | 2.74 | 5.84  | 0.37 | 37.50 | 13.32 | 173.00 | 70.20  | 349.00 | 74.20 | 652.00 | 128.10 | 10080 | 1.66 | 162.10 | 13.02  | 242.49 |
| ZB4-2-60 | 292  | 219  | 2.74  | 1053 | 2.45 | 0.02 | 16.41 | 0.12 | 2.09 | 3.25  | 0.79 | 18.70 | 6.30  | 81.90  | 33.80  | 171.80 | 37.80 | 368.00 | 81.70  | 10050 | 0.93 | 294.10 | 25.66  | 473.65 |
| ZB4-2-61 | 1867 | 313  | 8.60  | 1302 | 3.67 | 0.00 | 23.70 | 0.26 | 3.85 | 6.15  | 0.62 | 28.70 | 9.22  | 119.50 | 43.20  | 210.40 | 42.40 | 372.00 | 71.10  | 9510  | 1.48 | 449.00 | 219.17 | 517.33 |
| ZB4-2-62 | 312  | 283  | 5.88  | 735  | 1.34 | 0.00 | 22.50 | 0.05 | 1.16 | 2.95  | 0.99 | 15.20 | 5.14  | 61.80  | 23.10  | 119.90 | 26.40 | 246.00 | 54.00  | 9940  | 0.29 | 89.00  | 7.62   | 132.51 |
| ZB4-2-63 | 282  | 271  | 4.74  | 1371 | 3.15 | 0.15 | 44.00 | 0.20 | 2.54 | 4.92  | 1.17 | 25.20 | 8.18  | 110.30 | 42.30  | 230.00 | 51.80 | 512.00 | 108.30 | 10050 | 0.71 | 141.50 | 7.15   | 120.28 |
| ZB4-2-64 | 2515 | 910  | 4.14  | 489  | 2.02 | 5.20 | 62.30 | 2.25 | 8.30 | 3.14  | 0.90 | 11.71 | 3.42  | 39.00  | 15.01  | 77.30  | 18.41 | 185.80 | 42.50  | 11120 | 0.72 | 263.00 | 223.94 | 372.05 |
| ZB4-2-65 | 312  | 158  | 3.01  | 1177 | 6.63 | -    | 48.70 | 0.06 | 0.72 | 2.63  | 1.51 | 19.80 | 6.57  | 86.80  | 35.30  | 183.70 | 43.70 | 441.00 | 100.40 | 11100 | 2.10 | 452.00 | 36.33  | 590.43 |
| ZB4-2-68 | 283  | 271  | 5.59  | 2940 | 3.23 | 0.05 | 17.87 | 0.46 | 8.28 | 16.40 | 3.03 | 86.00 | 25.80 | 296.00 | 103.70 | 468.00 | 88.30 | 744.00 | 143.10 | 8140  | 0.66 | 380.00 | 24.28  | 437.15 |
| ZB4-2-69 | 280  | 357  | 3.94  | 2216 | 1.12 | 0.05 | 15.26 | 0.46 | 6.88 | 11.67 | 3.12 | 55.50 | 17.25 | 208.00 | 76.80  | 348.00 | 76.40 | 711.00 | 140.60 | 7460  | 0.27 | 226.00 | 12.97  | 232.03 |



|           |      |     |        |      |      |      |       |      |       |       |      |        |       |        |        |        |        |         |        |       |      |        |        |         |
|-----------|------|-----|--------|------|------|------|-------|------|-------|-------|------|--------|-------|--------|--------|--------|--------|---------|--------|-------|------|--------|--------|---------|
| ZB4-2-70  | 1883 | 370 | 16.40  | 736  | 6.26 | -    | 9.20  | 0.04 | 1.30  | 2.21  | 0.21 | 18.60  | 5.19  | 69.80  | 25.80  | 124.00 | 31.20  | 304.00  | 59.70  | 11080 | 3.23 | 55.40  | 43.62  | 121.54  |
| ZB4-2-71  | 292  | 275 | 5.65   | 1255 | 4.80 | -    | 72.10 | 0.09 | 2.07  | 4.58  | 1.03 | 24.40  | 8.20  | 107.90 | 42.00  | 207.00 | 44.10  | 400.00  | 80.50  | 9740  | 1.20 | 152.30 | 7.79   | 126.74  |
| ZB4-2-72  | 373  | 37  | -      | 844  | 2.12 | 0.00 | 22.50 | 0.03 | 0.64  | 1.25  | 0.72 | 7.31   | 2.59  | 41.90  | 20.70  | 141.60 | 38.10  | 439.00  | 111.60 | 11890 | 0.24 | 110.60 | 18.78  | 278.91  |
| ZB4-2-73  | 288  | 165 | 5.21   | 1165 | 4.25 | 0.10 | 67.30 | 0.16 | 2.40  | 4.51  | 1.24 | 22.80  | 7.29  | 93.40  | 37.00  | 190.40 | 43.60  | 443.00  | 94.70  | 9980  | 0.89 | 166.60 | 8.65   | 140.47  |
| ZB4-2-74  | 365  | 40  | 1.53   | 1084 | 4.83 | 0.04 | 62.30 | 0.04 | 0.69  | 1.27  | 0.78 | 9.74   | 3.96  | 59.30  | 27.80  | 175.50 | 47.40  | 519.00  | 130.50 | 10320 | 0.41 | 305.40 | 34.51  | 513.96  |
| ZB4-2-75  | 296  | 285 | 17.60  | 953  | 0.93 | 0.01 | 40.40 | 0.20 | 2.78  | 5.48  | 3.07 | 24.80  | 7.19  | 83.80  | 31.80  | 147.40 | 30.20  | 272.00  | 55.20  | 6470  | 0.27 | 115.10 | 4.23   | 56.03   |
| ZB4-2-76  | 2484 | 156 | 2.47   | 459  | 2.03 | -    | 26.80 | 0.03 | 0.57  | 1.08  | 0.23 | 6.28   | 2.37  | 32.60  | 12.99  | 71.80  | 17.88  | 177.30  | 36.60  | 12160 | 1.45 | 137.10 | 160.43 | 285.03  |
| ZB4-2-77  | 1878 | 558 | 5.50   | 737  | 1.57 | 0.02 | 3.83  | 0.04 | 0.71  | 1.99  | 0.19 | 14.10  | 4.79  | 61.50  | 23.19  | 127.80 | 30.40  | 302.00  | 65.40  | 13800 | 1.16 | 43.90  | 190.77 | 544.80  |
| ZB4-2-78  | 282  | 257 | 9.11   | 1098 | 2.73 | 0.00 | 57.00 | 0.14 | 2.37  | 4.25  | 1.45 | 22.10  | 7.52  | 95.80  | 36.50  | 178.40 | 38.90  | 367.00  | 77.10  | 8540  | 0.73 | 134.00 | 6.39   | 104.61  |
| ZB4-2-79  | 302  | 261 | 6.06   | 1827 | 8.93 | -    | 60.10 | 0.06 | 1.80  | 3.97  | 1.77 | 26.50  | 9.47  | 136.10 | 55.50  | 291.00 | 67.70  | 694.00  | 151.80 | 10030 | 1.74 | 226.70 | 14.08  | 232.01  |
| ZB4-2-80  | 1850 | 37  | 5.34   | 126  | 0.87 | -    | 9.78  | 0.06 | 0.78  | 0.76  | 0.09 | 2.70   | 0.87  | 9.55   | 3.52   | 18.34  | 4.25   | 45.80   | 10.46  | 10910 | 0.17 | 205.20 | 216.89 | 567.14  |
| ZB4-2-81  | 309  | 232 | 4.63   | 1638 | 9.32 | 0.01 | 73.40 | 0.09 | 1.63  | 3.84  | 1.91 | 26.10  | 9.26  | 123.00 | 49.70  | 259.00 | 60.30  | 620.00  | 131.50 | 11000 | 2.19 | 653.00 | 38.33  | 604.51  |
| ZB4-2-82  | 289  | 273 | 4.37   | 1654 | 2.73 | 0.01 | 16.70 | 0.14 | 2.99  | 5.75  | 1.13 | 29.80  | 11.27 | 140.40 | 53.10  | 263.00 | 54.80  | 511.00  | 102.40 | 9330  | 0.92 | 550.00 | 36.96  | 657.32  |
| ZB4-2-83  | 1799 | 547 | 13.20  | 853  | 1.11 | 0.00 | 1.23  | 0.02 | 0.69  | 2.19  | 0.03 | 16.40  | 6.27  | 76.20  | 26.95  | 126.30 | 25.50  | 246.00  | 47.80  | 13550 | 1.01 | 33.40  | 144.35 | 415.79  |
| ZB4-2-84  | 2510 | 486 | 23.30  | 1430 | 3.06 | 0.26 | 34.70 | 1.00 | 9.30  | 12.10 | 3.72 | 36.10  | 12.66 | 140.50 | 46.20  | 227.00 | 48.70  | 473.00  | 92.60  | 11480 | 1.81 | 404.00 | 390.75 | 735.26  |
| ZB4-2-85  | 2017 | 285 | 4.80   | 470  | 1.03 | 0.10 | 22.00 | 0.54 | 5.70  | 6.10  | 1.36 | 20.80  | 5.49  | 53.50  | 14.30  | 61.10  | 12.57  | 110.20  | 23.10  | 11630 | 0.58 | 142.00 | 183.78 | 447.40  |
| ZB4-2-86  | 298  | 352 | 3.50   | 2144 | 3.57 | 0.15 | 48.30 | 0.50 | 7.26  | 9.65  | 4.36 | 45.00  | 13.46 | 165.70 | 66.30  | 345.00 | 80.90  | 836.00  | 192.30 | 9170  | 1.11 | 773.00 | 43.53  | 702.05  |
| ZB4-2-87  | 287  | 420 | 8.95   | 1845 | 5.99 | 0.35 | 97.10 | 0.28 | 4.22  | 7.47  | 1.61 | 41.80  | 13.03 | 167.00 | 61.80  | 291.80 | 59.10  | 543.00  | 107.00 | 9200  | 1.04 | 237.70 | 11.52  | 183.48  |
| ZB4-2-88  | 282  | 165 | 3.13   | 793  | 4.35 | 0.55 | 59.90 | 0.16 | 1.25  | 2.15  | 0.59 | 10.54  | 3.62  | 52.40  | 22.35  | 130.60 | 32.10  | 354.00  | 77.90  | 10450 | 0.82 | 253.90 | 12.75  | 211.39  |
| ZB4-2-89  | 2081 | 297 | 115.00 | 1060 | 2.97 | 2.08 | 17.20 | 1.02 | 10.10 | 10.90 | 1.19 | 38.20  | 10.86 | 115.60 | 40.70  | 169.10 | 32.20  | 286.00  | 50.20  | 9600  | 1.22 | 93.90  | 60.14  | 138.14  |
| ZB4-2-90  | 1887 | 924 | 33.00  | 3790 | 2.97 | 0.13 | 7.46  | 0.80 | 12.44 | 22.80 | 1.34 | 105.10 | 32.60 | 384.00 | 128.40 | 586.00 | 115.00 | 944.00  | 183.40 | 9260  | 1.02 | 458.00 | 306.24 | 779.77  |
| ZB4-2-91  | 309  | 227 | 7.11   | 1082 | 4.35 | 0.06 | 18.20 | 0.25 | 2.47  | 4.51  | 2.53 | 19.20  | 6.81  | 85.00  | 33.20  | 170.10 | 40.20  | 428.00  | 96.60  | 9370  | 0.70 | 158.70 | 31.81  | 615.80  |
| ZB4-2-92  | 286  | 300 | 8.51   | 1795 | 3.77 | 0.01 | 58.30 | 0.19 | 3.66  | 6.70  | 2.57 | 40.30  | 13.20 | 162.50 | 58.80  | 295.00 | 61.20  | 583.00  | 117.00 | 7220  | 0.69 | 369.00 | 15.44  | 233.24  |
| ZB4-2-94  | 380  | 174 | 6.30   | 537  | 3.25 | 0.02 | 30.80 | 0.03 | 0.54  | 1.42  | 0.31 | 9.14   | 3.03  | 41.40  | 15.74  | 88.90  | 21.40  | 219.00  | 45.90  | 11050 | 1.17 | 211.00 | 18.91  | 256.78  |
| ZB4-2-95  | 308  | 326 | 7.30   | 1512 | 2.04 | 0.17 | 31.30 | 0.28 | 4.02  | 6.93  | 1.84 | 33.60  | 11.00 | 133.50 | 51.80  | 258.00 | 53.30  | 494.00  | 104.00 | 8950  | 0.43 | 137.80 | 7.29   | 108.86  |
| ZB4-2-96  | 314  | 203 | 5.20   | 1061 | 1.74 | 0.02 | 48.60 | 0.15 | 1.99  | 3.83  | 2.05 | 20.80  | 7.03  | 88.40  | 34.20  | 172.30 | 37.80  | 342.00  | 76.20  | 7230  | 0.39 | 124.90 | 5.77   | 82.46   |
| ZB4-2-97  | 283  | 128 | 2.66   | 705  | 2.36 | -    | 12.90 | 0.02 | 0.85  | 1.73  | 0.26 | 10.60  | 4.19  | 52.50  | 21.00  | 100.50 | 27.20  | 268.00  | 55.00  | 9440  | 0.94 | 173.00 | 17.92  | 376.47  |
| ZB4-2-98  | 285  | 588 | 7.60   | 4140 | 5.95 | 0.06 | 39.90 | 1.01 | 17.50 | 30.20 | 7.29 | 124.00 | 38.00 | 463.00 | 154.00 | 685.00 | 140.00 | 1160.00 | 225.00 | 8000  | 1.04 | 477.00 | 24.04  | 416.73  |
| ZB4-2-99  | 1816 | 361 | 11.51  | 637  | 1.10 | 0.19 | 7.93  | 0.98 | 9.29  | 10.67 | 2.04 | 32.60  | 9.31  | 86.50  | 21.95  | 82.60  | 15.08  | 120.20  | 20.37  | 13180 | 0.77 | 243.40 | 357.06 | 1089.30 |
| ZB4-2-100 | 308  | 162 | 4.03   | 1139 | 5.70 | -    | 45.40 | 0.06 | 1.09  | 2.35  | 1.22 | 16.40  | 5.72  | 79.40  | 35.80  | 190.30 | 46.80  | 481.00  | 109.90 | 10130 | 1.34 | 229.00 | 14.11  | 222.84  |

|           |      |      |       |      |       |      |       |      |       |       |      |       |       |        |        |        |        |         |        |       |      |        |        |        |
|-----------|------|------|-------|------|-------|------|-------|------|-------|-------|------|-------|-------|--------|--------|--------|--------|---------|--------|-------|------|--------|--------|--------|
| ZB4-2-101 | 283  | 250  | 6.60  | 1227 | 1.22  | 0.03 | 23.00 | 0.21 | 2.72  | 5.60  | 1.04 | 30.00 | 9.30  | 117.00 | 44.50  | 190.00 | 43.80  | 368.00  | 78.90  | 8040  | 0.37 | 93.70  | 5.84   | 104.51 |
| ZB4-2-102 | 284  | 246  | 13.70 | 750  | 0.89  | -    | 8.30  | 0.06 | 0.99  | 2.40  | 0.45 | 12.90 | 4.53  | 62.30  | 24.31  | 127.90 | 28.40  | 273.00  | 57.50  | 8760  | 0.30 | 35.50  | 3.07   | 58.81  |
| ZB4-2-103 | 323  | 173  | 3.47  | 1046 | 2.29  | 0.02 | 34.20 | 0.16 | 2.76  | 3.79  | 1.78 | 20.40 | 6.18  | 78.00  | 31.60  | 164.20 | 36.60  | 372.00  | 84.00  | 10020 | 0.65 | 167.60 | 8.51   | 119.95 |
| ZB4-2-104 | 309  | 59   | 1.83  | 572  | 2.71  | 0.02 | 23.10 | 0.03 | 0.39  | 0.91  | 0.57 | 6.24  | 2.45  | 35.30  | 15.55  | 95.60  | 23.10  | 256.00  | 65.20  | 11740 | 0.41 | 127.90 | 14.17  | 254.44 |
| ZB4-2-106 | 348  | 3400 | 5.42  | 1848 | 5.47  | 4.10 | 36.80 | 2.21 | 14.40 | 8.70  | 3.52 | 35.70 | 12.12 | 160.20 | 61.80  | 300.00 | 64.00  | 578.00  | 117.20 | 8320  | 0.69 | 176.60 | 15.15  | 221.19 |
| ZB4-2-107 | 2507 | 222  | 7.52  | 439  | 2.16  | -    | 10.16 | 0.02 | 0.44  | 1.28  | 0.08 | 8.51  | 3.05  | 37.90  | 13.05  | 66.20  | 14.20  | 142.70  | 29.20  | 12250 | 1.85 | 102.90 | 169.53 | 305.34 |
| ZB4-2-108 | 2546 | 153  | 4.20  | 382  | 1.56  | -    | 27.10 | 0.04 | 0.84  | 2.33  | 0.46 | 9.30  | 2.58  | 32.90  | 12.60  | 61.50  | 13.50  | 135.00  | 29.00  | 10650 | 0.68 | 123.00 | 138.64 | 228.93 |
| ZB4-2-109 | 1858 | 263  | 20.80 | 306  | 0.94  | 0.04 | 5.93  | 0.26 | 4.06  | 7.83  | 0.25 | 24.00 | 5.37  | 43.70  | 10.54  | 32.60  | 5.21   | 37.30   | 5.78   | 12430 | 0.62 | 192.90 | 160.05 | 423.97 |
| ZB4-2-110 | 292  | 520  | 4.00  | 1430 | 1.37  | 0.07 | 11.50 | 0.10 | 1.28  | 3.21  | 1.00 | 20.90 | 8.23  | 121.00 | 45.60  | 240.00 | 50.80  | 577.00  | 101.30 | 10240 | 0.48 | 116.00 | 12.04  | 248.26 |
| ZB4-4-1   | 2503 | 621  | 4.60  | 1484 | 4.45  | 0.01 | 18.21 | 0.07 | 1.28  | 3.74  | 0.22 | 24.30 | 9.27  | 119.90 | 47.50  | 241.60 | 50.60  | 453.00  | 95.10  | 12920 | 3.15 | 217.60 | 381.16 | 689.20 |
| ZB4-4-2   | 1854 | 633  | 4.64  | 1280 | 0.91  | 0.00 | 1.16  | 0.10 | 1.48  | 4.75  | 0.03 | 34.80 | 12.24 | 130.50 | 42.30  | 167.90 | 29.30  | 238.40  | 45.00  | 13510 | 0.54 | 59.60  | 177.42 | 477.15 |
| ZB4-4-3   | 2497 | 51   | 1.94  | 246  | 1.07  | -    | 4.98  | -    | -     | 0.20  | 0.09 | 1.85  | 0.96  | 13.15  | 6.56   | 40.90  | 11.19  | 132.90  | 35.80  | 14440 | 0.98 | 50.20  | 219.56 | 403.46 |
| ZB4-4-4   | 1830 | 289  | 20.60 | 257  | 0.89  | -    | 8.40  | 0.20 | 3.33  | 7.66  | 0.14 | 24.90 | 5.40  | 37.90  | 8.13   | 24.12  | 3.41   | 21.60   | 3.29   | 13360 | 0.33 | 140.80 | 90.93  | 233.79 |
| ZB4-4-5   | 2529 | 191  | 8.23  | 622  | 3.35  | -    | 29.60 | 0.04 | 0.87  | 2.30  | 0.29 | 11.48 | 4.27  | 53.80  | 20.28  | 97.80  | 20.84  | 185.80  | 37.00  | 11600 | 1.51 | 248.00 | 235.27 | 391.66 |
| ZB4-4-6   | 2489 | 160  | 14.40 | 377  | 1.03  | 0.00 | 14.88 | 0.12 | 1.81  | 2.94  | 0.69 | 13.39 | 3.56  | 35.40  | 12.00  | 54.30  | 10.99  | 100.10  | 20.53  | 9990  | 0.43 | 83.70  | 75.17  | 121.51 |
| ZB4-4-7   | 2506 | 309  | 6.40  | 715  | 2.28  | 0.02 | 34.00 | 0.14 | 2.12  | 4.25  | 1.16 | 21.00 | 5.82  | 65.00  | 21.90  | 101.10 | 22.00  | 215.00  | 46.60  | 11320 | 1.40 | 258.00 | 125.78 | 193.25 |
| ZB4-4-8   | 2594 | 250  | 5.10  | 497  | 1.13  | 0.56 | 13.90 | 0.88 | 7.20  | 4.30  | 1.70 | 13.50 | 3.45  | 40.30  | 13.60  | 62.10  | 15.20  | 157.00  | 36.00  | 11390 | 0.47 | 64.20  | 95.10  | 165.13 |
| ZB4-4-9   | 2526 | 135  | 3.21  | 397  | 0.92  | -    | 15.44 | 0.03 | 0.73  | 1.12  | 0.34 | 6.38  | 2.41  | 30.00  | 12.40  | 63.10  | 15.02  | 154.00  | 34.70  | 10980 | 0.45 | 46.90  | 71.73  | 121.72 |
| ZB4-4-10  | 1850 | 1098 | 7.10  | 2008 | 0.79  | 0.00 | 1.45  | 0.11 | 1.82  | 5.60  | 0.10 | 38.10 | 13.86 | 184.70 | 68.60  | 336.00 | 68.30  | 606.00  | 119.00 | 11980 | 0.50 | 73.70  | 103.92 | 279.18 |
| ZB4-4-11  | 1860 | 1834 | 6.58  | 3760 | 0.95  | -    | 0.98  | 0.09 | 1.69  | 7.08  | 0.07 | 54.20 | 22.85 | 320.00 | 127.20 | 626.00 | 129.10 | 1134.00 | 210.90 | 12640 | 0.70 | 97.40  | 209.66 | 564.23 |
| ZB4-4-12  | 3195 | 230  | 11.00 | 763  | 1.97  | 0.15 | 13.75 | 0.21 | 2.06  | 2.31  | 0.76 | 15.70 | 5.38  | 66.40  | 24.90  | 118.80 | 25.40  | 227.00  | 46.30  | 11350 | 1.51 | 120.20 | 293.26 | 376.32 |
| ZB4-4-13  | 1873 | 1071 | 6.62  | 2027 | 0.75  | -    | 0.59  | 0.02 | 0.89  | 3.40  | 0.08 | 27.60 | 12.01 | 166.60 | 67.90  | 335.00 | 68.70  | 598.00  | 116.10 | 13100 | 0.59 | 44.20  | 122.03 | 330.70 |
| ZB4-4-14  | 2499 | 177  | 6.09  | 393  | 1.13  | -    | 21.54 | 0.04 | 0.64  | 1.48  | 0.21 | 7.96  | 2.52  | 31.60  | 11.69  | 62.40  | 13.53  | 127.20  | 26.43  | 11800 | 0.64 | 80.10  | 63.60  | 104.40 |
| ZB4-4-15  | 1710 | 570  | 36.10 | 613  | 1.00  | 0.03 | 3.99  | 0.47 | 7.50  | 14.30 | 0.12 | 58.50 | 12.53 | 99.30  | 21.20  | 55.50  | 7.53   | 45.90   | 7.16   | 11770 | 0.62 | 16.58  | 8.52   | 18.84  |
| ZB4-4-16  | 2515 | 124  | 3.00  | 420  | 1.57  | -    | 41.40 | 0.07 | 1.16  | 2.42  | 0.64 | 9.70  | 2.69  | 33.10  | 12.35  | 65.20  | 14.12  | 159.70  | 35.80  | 11270 | 0.58 | 270.00 | 237.95 | 382.88 |
| ZB4-4-17  | 328  | 122  | 1.86  | 598  | 1.54  | -    | 19.80 | 0.02 | 0.39  | 1.38  | 0.57 | 9.32  | 3.27  | 43.20  | 18.00  | 102.70 | 25.80  | 268.00  | 62.90  | 11490 | 0.74 | 80.70  | 7.46   | 128.05 |
| ZB4-4-18  | 323  | 263  | 2.54  | 1454 | 10.55 | 0.21 | 32.70 | 0.13 | 1.25  | 3.86  | 1.25 | 25.50 | 8.69  | 114.60 | 46.10  | 240.10 | 51.20  | 498.00  | 107.10 | 11000 | 2.90 | 500.00 | 50.08  | 852.46 |
| ZB4-4-19  | 1818 | 133  | 12.00 | 493  | 1.71  | -    | 12.46 | 0.05 | 1.23  | 1.91  | 0.23 | 10.27 | 3.39  | 41.50  | 16.29  | 81.90  | 16.66  | 150.50  | 30.30  | 10720 | 0.67 | 90.00  | 61.13  | 148.17 |
| ZB4-4-20  | 289  | 206  | 4.15  | 720  | 2.94  | 0.49 | 44.70 | 0.17 | 1.70  | 2.78  | 0.94 | 12.84 | 4.31  | 56.60  | 21.92  | 115.10 | 26.70  | 269.80  | 59.90  | 9740  | 1.05 | 350.00 | 18.93  | 314.48 |

|          |      |      |       |      |       |      |       |      |       |       |      |       |       |        |       |        |       |        |        |       |       |        |        |        |
|----------|------|------|-------|------|-------|------|-------|------|-------|-------|------|-------|-------|--------|-------|--------|-------|--------|--------|-------|-------|--------|--------|--------|
| ZB4-4-21 | 1807 | 147  | 10.60 | 405  | 6.57  | -    | 6.06  | 0.06 | 0.95  | 2.14  | 0.02 | 10.16 | 3.29  | 39.70  | 13.77 | 64.60  | 12.25 | 109.80 | 22.09  | 11480 | 3.53  | 46.10  | 130.56 | 363.38 |
| ZB4-4-22 | 340  | 210  | 12.70 | 1114 | 0.75  | 0.01 | 12.87 | 0.26 | 3.66  | 8.02  | 1.74 | 35.40 | 9.65  | 115.10 | 38.90 | 172.20 | 33.70 | 283.00 | 56.10  | 8250  | 0.28  | 126.60 | 7.36   | 101.48 |
| ZB4-4-23 | 1855 | 444  | 9.40  | 976  | 1.72  | -    | 4.55  | 0.03 | 0.47  | 1.92  | -    | 14.80 | 5.76  | 78.60  | 32.50 | 161.30 | 35.30 | 323.00 | 62.40  | 12790 | 1.24  | 100.50 | 172.83 | 460.52 |
| ZB4-4-24 | 1847 | 526  | 11.20 | 965  | 0.66  | 0.04 | 1.14  | 0.09 | 1.18  | 3.25  | 0.01 | 24.10 | 8.01  | 94.80  | 32.90 | 144.00 | 28.60 | 235.00 | 46.40  | 12380 | 0.31  | 64.50  | 108.80 | 306.59 |
| ZB4-4-25 | 2104 | 101  | 8.40  | 460  | 0.45  | 0.02 | 20.50 | 0.08 | 1.56  | 4.04  | 0.82 | 14.40 | 4.01  | 44.50  | 14.50 | 65.80  | 13.90 | 118.00 | 24.70  | 9210  | 0.12  | 30.50  | 20.76  | 44.86  |
| ZB4-4-26 | 1879 | 942  | 9.10  | 1825 | 1.06  | -    | 1.27  | 0.05 | 1.27  | 3.83  | 0.11 | 28.00 | 11.48 | 157.40 | 61.20 | 301.00 | 64.20 | 553.00 | 112.20 | 11910 | 0.51  | 58.30  | 106.99 | 280.69 |
| ZB4-4-27 | 1821 | 210  | 10.10 | 221  | 1.58  | 0.02 | 1.89  | 0.05 | 1.09  | 2.25  | 0.06 | 12.00 | 3.10  | 26.80  | 7.02  | 27.00  | 4.90  | 41.60  | 8.04   | 14610 | 0.95  | 75.20  | 151.59 | 443.30 |
| ZB4-4-28 | 1860 | 351  | 10.20 | 2018 | 5.50  | 0.09 | 23.80 | 0.82 | 11.30 | 17.80 | 1.54 | 78.70 | 20.81 | 220.30 | 71.70 | 300.00 | 56.20 | 456.00 | 83.50  | 8970  | 1.77  | 376.00 | 231.34 | 562.04 |
| ZB4-4-29 | 1878 | 822  | 7.68  | 1545 | 0.75  | -    | 0.74  | 0.05 | 1.06  | 3.60  | 0.03 | 26.90 | 10.78 | 141.20 | 53.80 | 241.00 | 49.30 | 406.00 | 79.30  | 12050 | 0.36  | 55.90  | 118.82 | 313.69 |
| ZB4-4-30 | 1874 | 1145 | 7.14  | 2135 | 0.96  | 0.00 | 0.69  | 0.06 | 0.99  | 3.29  | 0.11 | 28.40 | 12.66 | 181.20 | 72.00 | 366.00 | 76.70 | 660.00 | 130.00 | 12630 | 0.60  | 43.80  | 126.92 | 348.78 |
| ZB4-4-31 | 1855 | 196  | 11.30 | 570  | 1.54  | -    | 14.26 | 0.06 | 1.25  | 2.46  | 0.24 | 15.10 | 4.61  | 49.60  | 18.26 | 88.00  | 17.26 | 154.00 | 30.10  | 11060 | 0.74  | 214.40 | 178.00 | 442.23 |
| ZB4-4-32 | 2504 | 163  | 5.01  | 646  | 1.00  | -    | 8.45  | 0.05 | 0.84  | 2.56  | 0.36 | 14.40 | 4.76  | 55.30  | 20.85 | 104.00 | 21.29 | 200.60 | 40.70  | 8600  | 0.42  | 58.90  | 71.39  | 117.41 |
| ZB4-4-33 | 2526 | 190  | 5.91  | 2060 | 3.02  | 0.16 | 87.00 | 1.31 | 17.10 | 23.60 | 8.46 | 93.20 | 22.20 | 227.60 | 67.80 | 285.00 | 54.30 | 466.00 | 87.90  | 8420  | 1.03  | 764.00 | 292.18 | 366.12 |
| ZB4-4-34 | 343  | 156  | 2.76  | 843  | 3.06  | -    | 37.60 | 0.05 | 1.36  | 2.61  | 0.91 | 15.20 | 4.71  | 63.30  | 26.90 | 126.80 | 31.00 | 341.00 | 72.50  | 10810 | 1.49  | 307.00 | 25.77  | 403.69 |
| ZB4-4-35 | 1807 | 215  | 10.40 | 284  | 0.58  | -    | 2.09  | 0.12 | 2.32  | 7.86  | 0.11 | 36.00 | 6.42  | 45.40  | 9.66  | 23.70  | 2.89  | 18.50  | 2.66   | 11700 | 0.13  | 137.50 | 147.91 | 393.77 |
| ZB4-4-36 | 401  | 161  | 8.60  | 613  | 1.75  | 0.00 | 17.86 | 0.10 | 1.60  | 2.56  | 0.54 | 13.00 | 3.90  | 47.30  | 20.32 | 100.70 | 23.10 | 225.00 | 47.70  | 9640  | 0.67  | 143.40 | 13.46  | 174.37 |
| ZB4-4-37 | 2491 | 288  | 7.58  | 924  | 2.33  | 0.01 | 33.00 | 0.08 | 1.06  | 2.62  | 0.49 | 17.00 | 5.56  | 71.80  | 27.94 | 144.40 | 32.20 | 314.00 | 69.40  | 11640 | 1.54  | 195.30 | 113.10 | 166.87 |
| ZB4-4-38 | 1853 | 444  | 12.50 | 560  | 0.89  | 0.01 | 1.48  | 0.02 | 0.43  | 1.90  | 0.11 | 17.10 | 5.72  | 57.60  | 17.56 | 83.30  | 20.10 | 203.00 | 42.80  | 13760 | 0.87  | 26.01  | 203.45 | 591.56 |
| ZB4-4-39 | 2016 | 969  | 6.84  | 2277 | 0.89  | 1.12 | 4.16  | 1.97 | 12.80 | 11.16 | 2.27 | 52.20 | 18.81 | 228.90 | 75.00 | 311.00 | 56.80 | 462.00 | 81.60  | 12720 | 0.47  | 94.80  | 245.11 | 643.20 |
| ZB4-4-40 | 2518 | 224  | 6.79  | 634  | 0.97  | 0.02 | 18.98 | 0.16 | 2.05  | 3.23  | 0.99 | 15.00 | 4.42  | 52.60  | 19.60 | 95.00  | 21.40 | 193.90 | 42.90  | 8810  | 0.42  | 91.70  | 77.64  | 122.80 |
| ZB4-4-41 | 330  | 136  | 3.24  | 521  | 1.79  | -    | 28.80 | 0.04 | 0.85  | 2.03  | 0.70 | 10.90 | 3.43  | 41.70  | 16.37 | 85.60  | 18.47 | 180.70 | 40.30  | 10930 | 0.53  | 138.10 | 11.10  | 180.07 |
| ZB4-4-42 | 2516 | 199  | 5.44  | 843  | 16.00 | 0.07 | 6.89  | 0.05 | 0.76  | 1.85  | 0.37 | 15.50 | 5.29  | 69.30  | 27.90 | 146.10 | 30.40 | 292.00 | 64.40  | 8730  | 11.47 | 31.20  | 81.88  | 153.40 |
| ZB4-4-43 | 326  | 144  | 4.45  | 443  | 0.94  | 0.01 | 22.20 | 0.06 | 0.75  | 1.47  | 0.72 | 8.66  | 2.98  | 38.20  | 13.63 | 72.20  | 15.77 | 157.20 | 34.70  | 10150 | 0.41  | 97.80  | 8.60   | 140.92 |
| ZB4-4-44 | 1903 | 869  | 13.00 | 1873 | 1.11  | 0.03 | 3.64  | 0.20 | 3.35  | 7.88  | 0.17 | 41.40 | 14.78 | 174.80 | 62.30 | 297.00 | 57.50 | 508.00 | 98.70  | 10730 | 0.69  | 142.60 | 156.52 | 413.87 |
| ZB4-4-45 | 311  | 163  | 5.45  | 754  | 2.89  | 0.00 | 46.90 | 0.12 | 1.55  | 2.68  | 1.28 | 15.00 | 4.90  | 60.60  | 22.70 | 115.70 | 26.90 | 261.00 | 59.00  | 9270  | 0.71  | 315.10 | 20.38  | 332.73 |
| ZB4-4-46 | 1671 | 146  | 15.10 | 1277 | 1.61  | 0.06 | 6.32  | 0.58 | 9.47  | 12.20 | 0.85 | 47.00 | 12.75 | 139.80 | 46.30 | 198.70 | 36.50 | 295.00 | 56.40  | 7610  | 0.49  | 21.28  | 9.40   | 22.73  |
| ZB4-4-47 | 1805 | 89   | 4.82  | 294  | 1.06  | -    | 7.59  | 0.02 | 0.38  | 0.56  | 0.05 | 4.88  | 1.67  | 22.70  | 9.73  | 51.00  | 11.82 | 120.50 | 25.20  | 11910 | 0.69  | 100.60 | 110.70 | 288.07 |
| ZB4-4-48 | 2559 | 110  | 5.40  | 241  | 1.12  | -    | 14.09 | 0.01 | 0.18  | 0.72  | 0.10 | 4.11  | 1.49  | 19.40  | 7.28  | 36.60  | 8.47  | 88.00  | 19.24  | 10850 | 0.46  | 51.50  | 39.34  | 59.61  |
| ZB4-4-49 | 1845 | 324  | 12.80 | 701  | 1.25  | -    | 3.73  | 0.05 | 1.00  | 2.72  | 0.02 | 14.90 | 5.21  | 59.70  | 23.00 | 110.40 | 22.79 | 198.70 | 41.40  | 11350 | 0.64  | 84.30  | 80.24  | 197.00 |
| ZB4-4-50 | 2483 | 216  | 4.04  | 546  | 1.80  | -    | 40.90 | 0.10 | 2.05  | 3.43  | 1.07 | 15.60 | 4.23  | 48.70  | 16.41 | 80.10  | 17.35 | 161.80 | 35.30  | 11360 | 0.63  | 245.60 | 125.27 | 180.93 |

|          |      |      |       |      |       |      |       |      |      |       |      |       |       |        |        |        |       |        |        |       |       |        |        |        |
|----------|------|------|-------|------|-------|------|-------|------|------|-------|------|-------|-------|--------|--------|--------|-------|--------|--------|-------|-------|--------|--------|--------|
| ZB4-4-51 | 1871 | 897  | 15.10 | 1797 | 0.77  | -    | 1.85  | 0.07 | 1.11 | 3.95  | 0.07 | 30.90 | 11.33 | 156.30 | 60.90  | 292.00 | 58.80 | 495.00 | 95.90  | 11910 | 0.51  | 76.80  | 134.74 | 368.12 |
| ZB4-4-53 | 2548 | 192  | 4.82  | 727  | 2.91  | -    | 13.54 | 0.05 | 0.54 | 1.98  | 0.04 | 12.05 | 4.31  | 58.80  | 24.30  | 119.50 | 24.80 | 226.30 | 45.60  | 11120 | 1.35  | 105.40 | 139.56 | 235.76 |
| ZB4-4-54 | 1876 | 1219 | 9.42  | 2610 | 1.00  | 0.01 | 1.61  | 0.22 | 3.80 | 9.44  | 0.15 | 55.80 | 19.80 | 243.00 | 89.80  | 400.00 | 75.80 | 627.00 | 109.90 | 11510 | 0.51  | 112.70 | 133.00 | 346.97 |
| ZB4-4-55 | 1842 | 524  | 8.45  | 945  | 0.92  | -    | 1.67  | 0.06 | 1.30 | 3.53  | 0.10 | 18.70 | 6.20  | 81.30  | 31.80  | 157.10 | 32.50 | 288.00 | 54.70  | 10420 | 0.51  | 67.60  | 82.77  | 208.02 |
| ZB4-4-56 | 2160 | 507  | 15.40 | 1135 | 1.32  | 0.01 | 3.67  | 0.18 | 3.01 | 7.14  | 0.34 | 33.70 | 9.95  | 108.30 | 38.80  | 173.50 | 35.80 | 296.00 | 60.90  | 10890 | 0.60  | 160.40 | 212.12 | 449.32 |
| ZB4-4-57 | 1854 | 799  | 9.50  | 1468 | 0.78  | -    | 0.69  | 0.04 | 0.81 | 4.25  | 0.04 | 28.90 | 11.29 | 145.60 | 49.20  | 239.00 | 46.00 | 395.00 | 76.90  | 12040 | 0.57  | 52.10  | 153.21 | 420.99 |
| ZB4-4-58 | 1839 | 1196 | 6.56  | 2466 | 0.78  | 0.01 | 1.11  | 0.08 | 1.41 | 6.03  | 0.13 | 44.80 | 17.53 | 231.60 | 87.10  | 383.00 | 76.10 | 624.00 | 114.90 | 11630 | 0.46  | 79.00  | 153.99 | 427.99 |
| ZB4-4-59 | 2488 | 398  | 4.10  | 1166 | 5.07  | -    | 12.46 | 0.04 | 0.81 | 3.00  | 0.23 | 21.10 | 7.14  | 93.10  | 36.60  | 184.20 | 39.90 | 372.00 | 73.50  | 11710 | 3.18  | 337.00 | 297.13 | 486.74 |
| ZB4-4-60 | 1883 | 1005 | 10.90 | 3240 | 2.13  | 0.04 | 3.58  | 0.46 | 7.55 | 13.60 | 0.73 | 80.30 | 25.30 | 311.00 | 111.40 | 503.00 | 98.50 | 813.00 | 148.80 | 10840 | 0.78  | 272.20 | 161.43 | 381.64 |
| ZB4-4-61 | 1877 | 761  | 8.64  | 1451 | 0.76  | -    | 1.47  | 0.12 | 2.14 | 5.66  | 0.20 | 38.70 | 11.86 | 142.00 | 48.40  | 208.10 | 38.00 | 310.00 | 55.50  | 10490 | 0.39  | 65.10  | 76.76  | 200.59 |
| ZB4-4-62 | 300  | 219  | 4.08  | 1417 | 9.67  | -    | 43.80 | 0.04 | 0.93 | 2.73  | 1.23 | 20.30 | 8.15  | 106.20 | 47.00  | 250.00 | 56.60 | 539.00 | 122.20 | 10860 | 2.51  | 375.00 | 27.56  | 480.92 |
| ZB4-4-63 | 374  | 53   | 2.18  | 870  | 3.02  | 0.00 | 34.20 | 0.03 | 0.53 | 1.63  | 0.89 | 11.04 | 3.72  | 54.10  | 24.80  | 148.40 | 35.60 | 369.00 | 79.60  | 8210  | 0.40  | 50.30  | 6.13   | 90.37  |
| ZB4-4-64 | 1863 | 240  | 5.62  | 282  | 0.65  | -    | 0.58  | 0.03 | 0.42 | 2.65  | -    | 15.70 | 5.10  | 41.30  | 8.26   | 23.80  | 3.31  | 23.60  | 3.64   | 12840 | 0.46  | 21.30  | 243.43 | 676.83 |
| ZB4-4-65 | 1875 | 670  | 6.27  | 1379 | 0.56  | -    | 1.20  | 0.07 | 1.46 | 4.08  | 0.09 | 32.40 | 10.45 | 130.70 | 46.80  | 206.40 | 39.50 | 341.00 | 62.80  | 12540 | 0.35  | 79.10  | 147.10 | 390.52 |
| ZB4-4-66 | 1871 | 698  | 5.58  | 1339 | 0.70  | -    | 0.74  | 0.04 | 0.84 | 3.29  | 0.07 | 25.90 | 10.34 | 129.00 | 43.80  | 198.40 | 37.80 | 327.00 | 62.60  | 12190 | 0.52  | 59.30  | 203.86 | 540.60 |
| ZB4-4-67 | 1904 | 399  | 20.80 | 941  | 1.30  | 0.15 | 7.74  | 0.42 | 6.03 | 8.75  | 0.63 | 33.70 | 8.69  | 94.70  | 31.40  | 143.90 | 29.70 | 281.00 | 58.50  | 9810  | 0.90  | 127.60 | 132.52 | 343.00 |
| ZB4-4-68 | 1827 | 430  | 6.64  | 719  | 0.43  | -    | 0.83  | 0.03 | 0.60 | 2.82  | 0.03 | 19.90 | 6.06  | 68.90  | 25.00  | 106.00 | 22.50 | 191.00 | 35.00  | 11650 | 0.22  | 35.30  | 103.66 | 288.63 |
| ZB4-4-69 | 1860 | 1150 | 9.20  | 1989 | 0.74  | -    | 0.95  | 0.09 | 1.40 | 3.16  | 0.16 | 29.40 | 12.03 | 164.20 | 66.80  | 321.00 | 63.40 | 570.00 | 114.00 | 11980 | 0.49  | 56.40  | 101.48 | 275.92 |
| ZB4-4-70 | 2457 | 175  | 5.32  | 403  | 2.12  | -    | 28.40 | 0.02 | 0.57 | 1.49  | 0.18 | 7.44  | 2.59  | 31.10  | 11.83  | 59.00  | 12.63 | 123.10 | 24.94  | 10840 | 0.64  | 73.40  | 33.48  | 47.49  |
| ZB4-4-71 | 1988 | 1153 | 15.60 | 2320 | 3.72  | 0.99 | 28.00 | 0.66 | 6.47 | 10.30 | 2.01 | 52.70 | 18.60 | 237.00 | 76.00  | 363.00 | 68.00 | 602.00 | 107.30 | 11750 | 1.21  | 367.00 | 350.32 | 873.52 |
| ZB4-4-72 | 1872 | 562  | 6.10  | 989  | 1.79  | -    | 6.64  | 0.02 | 0.35 | 2.21  | 0.08 | 18.20 | 7.14  | 87.50  | 30.70  | 144.20 | 29.80 | 291.00 | 61.20  | 13750 | 1.65  | 56.60  | 232.66 | 648.39 |
| ZB4-4-73 | 2478 | 292  | 7.17  | 740  | 3.48  | -    | 34.50 | 0.06 | 1.02 | 2.66  | 0.24 | 13.80 | 4.47  | 58.00  | 22.10  | 115.30 | 25.90 | 252.00 | 49.80  | 11270 | 1.46  | 118.70 | 65.31  | 98.99  |
| ZB4-4-74 | 2474 | 515  | 6.13  | 1224 | 15.53 | -    | 12.16 | 0.00 | 0.12 | 1.31  | 0.21 | 12.22 | 5.64  | 92.40  | 39.10  | 211.60 | 46.70 | 436.00 | 82.40  | 11920 | 12.57 | 123.50 | 401.85 | 794.07 |
| ZB4-4-75 | 1861 | 700  | 7.53  | 1611 | 1.07  | 0.02 | 2.87  | 0.16 | 2.74 | 6.61  | 0.33 | 36.70 | 12.16 | 147.20 | 54.50  | 244.20 | 48.70 | 431.00 | 79.20  | 10690 | 0.54  | 129.00 | 143.83 | 365.00 |
| ZB4-4-76 | 1827 | 915  | 13.30 | 1986 | 1.19  | 0.03 | 2.23  | 0.12 | 2.35 | 6.48  | 0.03 | 37.20 | 13.99 | 184.30 | 67.60  | 315.00 | 64.00 | 543.00 | 101.10 | 11950 | 0.71  | 155.90 | 203.18 | 566.55 |
| ZB4-4-77 | 1857 | 245  | 16.00 | 306  | 0.77  | -    | 1.72  | 0.06 | 0.97 | 2.41  | 0.00 | 13.97 | 3.47  | 33.80  | 9.37   | 34.10  | 5.85  | 46.50  | 7.18   | 11490 | 0.39  | 65.80  | 37.41  | 92.69  |
| ZB4-4-78 | 3110 | 116  | 8.41  | 349  | 1.95  | 0.03 | 3.93  | 0.06 | 0.55 | 0.98  | 0.53 | 4.95  | 2.04  | 25.30  | 10.25  | 57.90  | 13.78 | 141.90 | 34.20  | 11720 | 1.66  | 47.00  | 278.01 | 401.57 |
| ZB4-4-79 | 2538 | 152  | 1.98  | 278  | 0.29  | 0.02 | 5.86  | 0.03 | 0.39 | 0.76  | 0.43 | 4.52  | 1.61  | 19.40  | 8.02   | 45.30  | 11.16 | 119.40 | 28.50  | 8340  | 0.14  | 40.40  | 38.32  | 62.92  |
| ZB4-4-80 | 1886 | 244  | 8.32  | 259  | 1.15  | 0.02 | 2.18  | 0.09 | 1.63 | 3.47  | 0.17 | 16.30 | 4.44  | 36.80  | 8.12   | 26.10  | 3.74  | 26.40  | 3.66   | 12650 | 0.79  | 92.80  | 281.17 | 777.90 |
| ZB4-4-81 | 2490 | 814  | 8.25  | 1606 | 2.68  | 0.00 | 9.13  | 0.06 | 1.13 | 4.20  | 0.08 | 27.30 | 9.92  | 130.80 | 50.60  | 255.90 | 55.00 | 513.00 | 104.10 | 13220 | 1.71  | 150.40 | 96.64  | 151.79 |

|           |      |     |       |      |      |      |       |      |      |       |      |       |       |        |       |        |       |        |        |       |      |        |        |        |
|-----------|------|-----|-------|------|------|------|-------|------|------|-------|------|-------|-------|--------|-------|--------|-------|--------|--------|-------|------|--------|--------|--------|
| ZB4-4-82  | 324  | 262 | 9.01  | 1176 | 4.01 | 0.02 | 54.60 | 0.22 | 3.04 | 5.18  | 1.94 | 27.50 | 8.27  | 101.90 | 38.20 | 188.00 | 40.80 | 376.00 | 76.30  | 8330  | 1.17 | 264.60 | 15.58  | 232.40 |
| ZB4-4-83  | 300  | 140 | 3.02  | 897  | 4.85 | -    | 30.00 | 0.04 | 0.57 | 1.85  | 0.99 | 13.10 | 4.78  | 64.00  | 27.50 | 152.20 | 35.80 | 388.00 | 88.20  | 10470 | 1.27 | 198.50 | 12.85  | 215.67 |
| ZB4-4-84  | 1871 | 115 | 6.96  | 440  | 2.85 | -    | 8.95  | 0.05 | 0.66 | 1.74  | 0.04 | 10.67 | 3.33  | 40.90  | 15.41 | 70.20  | 14.69 | 131.30 | 26.50  | 10100 | 0.91 | 36.60  | 42.05  | 109.04 |
| ZB4-4-85  | 304  | 189 | 4.32  | 1055 | 4.24 | 0.05 | 45.10 | 0.11 | 1.36 | 2.91  | 1.07 | 15.83 | 5.66  | 74.90  | 31.80 | 173.10 | 41.10 | 420.00 | 96.70  | 9880  | 1.09 | 227.70 | 12.31  | 191.03 |
| ZB4-4-86  | 1735 | 172 | 11.30 | 715  | 4.90 | -    | 12.10 | 0.13 | 2.06 | 3.77  | 0.09 | 20.30 | 6.00  | 69.00  | 23.65 | 113.20 | 23.10 | 201.00 | 37.60  | 10140 | 1.47 | 38.70  | 21.71  | 56.70  |
| ZB4-4-87  | 2499 | 268 | 3.70  | 546  | 1.66 | -    | 2.97  | 0.02 | 0.43 | 0.97  | -    | 8.73  | 3.21  | 45.60  | 17.64 | 92.60  | 20.95 | 195.80 | 39.60  | 12070 | 1.62 | 85.20  | 236.65 | 426.93 |
| ZB4-4-88  | 317  | 165 | 5.90  | 449  | 1.04 | -    | 17.50 | 0.04 | 0.83 | 2.13  | 0.62 | 9.63  | 2.78  | 37.60  | 13.74 | 70.40  | 16.06 | 157.90 | 35.20  | 9940  | 0.39 | 49.10  | 5.09   | 90.98  |
| ZB4-4-89  | 1849 | 201 | 5.11  | 387  | 1.18 | -    | 3.17  | 0.05 | 0.65 | 1.73  | 0.02 | 12.55 | 3.98  | 42.30  | 12.32 | 46.80  | 7.76  | 57.20  | 9.10   | 11410 | 0.70 | 69.60  | 192.57 | 530.44 |
| ZB4-4-90  | 1854 | 836 | 16.00 | 1754 | 0.64 | 0.00 | 1.89  | 0.13 | 2.58 | 7.51  | 0.24 | 42.90 | 13.71 | 169.40 | 60.50 | 285.00 | 54.70 | 474.00 | 90.30  | 11030 | 0.32 | 87.20  | 72.86  | 187.93 |
| ZB4-4-91  | 1838 | 270 | 15.50 | 554  | 1.25 | 0.07 | 3.09  | 0.22 | 2.98 | 5.81  | 0.37 | 27.90 | 7.49  | 64.20  | 17.20 | 67.50  | 11.74 | 95.00  | 16.70  | 12880 | 0.52 | 125.70 | 192.68 | 502.41 |
| ZB4-4-92  | 2647 | 144 | 4.82  | 555  | 0.80 | -    | 4.70  | 0.02 | 0.69 | 1.50  | 0.39 | 10.38 | 3.67  | 45.80  | 18.00 | 88.00  | 18.50 | 173.00 | 36.20  | 10590 | 0.39 | 20.20  | 33.62  | 53.09  |
| ZB4-4-93  | 1831 | 232 | 18.60 | 184  | 1.20 | 0.01 | 11.73 | 0.18 | 2.66 | 3.76  | 0.20 | 14.02 | 2.99  | 24.50  | 5.50  | 17.90  | 2.69  | 19.30  | 2.71   | 11290 | 0.45 | 138.90 | 109.48 | 283.29 |
| ZB4-4-94  | 1919 | 350 | 16.30 | 813  | 3.88 | 0.03 | 22.30 | 0.07 | 0.92 | 2.08  | 0.36 | 12.70 | 4.40  | 60.20  | 25.10 | 135.30 | 33.80 | 374.00 | 78.30  | 11910 | 1.45 | 143.70 | 143.49 | 361.28 |
| ZB4-4-95  | 2505 | 268 | 14.70 | 990  | 1.93 | 0.08 | 27.60 | 0.49 | 5.55 | 6.58  | 2.23 | 31.80 | 8.86  | 97.00  | 32.90 | 151.00 | 29.50 | 269.00 | 51.80  | 7640  | 0.51 | 67.40  | 36.86  | 53.77  |
| ZB4-4-96  | 2287 | 236 | 6.51  | 530  | 2.34 | 0.00 | 9.93  | 0.03 | 0.51 | 1.47  | 0.15 | 9.80  | 3.33  | 44.10  | 17.31 | 81.60  | 16.74 | 144.60 | 28.80  | 10370 | 0.83 | 68.30  | 83.10  | 151.91 |
| ZB4-4-97  | 1882 | 361 | 14.40 | 737  | 1.96 | 0.05 | 1.99  | 0.11 | 1.42 | 3.48  | 0.79 | 22.30 | 7.21  | 75.60  | 24.20 | 109.90 | 21.90 | 207.10 | 40.20  | 12410 | 2.10 | 50.30  | 188.99 | 535.76 |
| ZB4-4-98  | 2498 | 203 | 5.52  | 567  | 2.91 | -    | 29.40 | 0.05 | 0.69 | 1.99  | 0.33 | 10.43 | 3.70  | 46.10  | 17.90 | 91.20  | 20.60 | 197.20 | 40.80  | 12030 | 1.13 | 122.80 | 70.81  | 107.43 |
| ZB4-4-99  | 1874 | 597 | 6.68  | 1240 | 1.39 | 0.01 | 2.83  | 0.11 | 1.89 | 4.63  | 0.18 | 26.30 | 9.14  | 115.80 | 41.80 | 197.30 | 42.00 | 361.00 | 69.20  | 11190 | 0.95 | 119.40 | 188.21 | 514.65 |
| ZB4-4-100 | 1895 | 914 | 12.70 | 1960 | 0.98 | 0.01 | 2.13  | 0.22 | 3.98 | 7.19  | 0.20 | 43.10 | 13.76 | 181.10 | 69.70 | 314.00 | 63.90 | 517.00 | 94.60  | 11720 | 0.47 | 103.80 | 90.12  | 222.05 |
| ZB4-4-101 | 2436 | 495 | 13.90 | 2107 | 4.34 | 0.05 | 69.60 | 0.43 | 6.97 | 11.79 | 4.59 | 53.20 | 15.75 | 185.30 | 67.30 | 311.00 | 63.90 | 601.00 | 114.00 | 7470  | 1.10 | 251.70 | 155.81 | 254.41 |
| ZB4-4-102 | 326  | 149 | 8.13  | 436  | 0.94 | -    | 15.89 | 0.04 | 0.84 | 1.80  | 0.38 | 9.79  | 3.28  | 37.40  | 13.78 | 66.70  | 13.69 | 131.90 | 25.50  | 10220 | 0.48 | 45.20  | 4.17   | 68.90  |
| ZB4-4-103 | 1833 | 238 | 6.34  | 299  | 0.67 | -    | 0.66  | 0.02 | 0.54 | 2.41  | 0.07 | 16.20 | 4.74  | 40.50  | 9.50  | 29.10  | 4.22  | 29.00  | 4.52   | 13590 | 0.56 | 36.10  | 209.74 | 596.23 |
| ZB4-4-104 | 2505 | 135 | 4.23  | 367  | 1.95 | -    | 15.23 | 0.02 | 0.51 | 1.05  | 0.10 | 5.42  | 2.07  | 26.30  | 10.99 | 60.00  | 15.06 | 157.90 | 33.70  | 11800 | 0.82 | 70.50  | 46.52  | 70.97  |
| ZB4-4-105 | 1896 | 754 | 14.00 | 1397 | 1.00 | 0.12 | 2.68  | 0.11 | 1.44 | 3.59  | 0.08 | 25.00 | 9.24  | 119.10 | 47.20 | 230.20 | 46.60 | 435.00 | 81.90  | 12020 | 0.57 | 73.90  | 92.89  | 241.53 |
| ZB4-4-106 | 1836 | 384 | 13.60 | 576  | 1.08 | 0.09 | 1.54  | 0.28 | 2.34 | 4.68  | 0.65 | 24.40 | 6.78  | 62.70  | 18.20 | 80.20  | 15.60 | 136.20 | 27.90  | 13370 | 0.95 | 51.40  | 251.98 | 755.70 |
| ZB4-4-107 | 295  | 44  | 1.05  | 199  | 0.97 | -    | 8.88  | -    | -    | 0.23  | 0.16 | 1.62  | 0.82  | 12.30  | 5.41  | 32.60  | 8.40  | 97.60  | 25.70  | 11600 | 0.25 | 47.40  | 7.65   | 153.25 |
| ZB4-4-108 | 327  | 132 | 4.53  | 699  | 1.35 | -    | 18.01 | 0.08 | 1.42 | 2.41  | 0.56 | 13.21 | 4.67  | 61.00  | 22.37 | 112.90 | 25.50 | 225.70 | 45.50  | 7940  | 0.66 | 117.20 | 9.35   | 147.58 |
| ZB4-4-109 | 1896 | 555 | 7.74  | 921  | 0.90 | -    | 0.64  | 0.03 | 0.45 | 2.52  | 0.04 | 18.40 | 7.26  | 86.00  | 29.40 | 135.10 | 27.70 | 244.00 | 47.00  | 14170 | 0.65 | 42.00  | 163.48 | 464.49 |
| ZB4-4-110 | 1868 | 417 | 10.60 | 2057 | 1.65 | 0.03 | 6.21  | 0.48 | 7.19 | 12.05 | 0.35 | 59.50 | 18.11 | 210.00 | 73.20 | 319.00 | 62.10 | 539.00 | 97.20  | 9350  | 0.68 | 220.90 | 167.79 | 421.68 |

| Spots    | Age  | Lu/Sm  | Th/U | Nb/Hf    | Th/Nb | Hf/Th  | ΣREE    | LREE   | HREE    | LREE/HREE | LaN/YbN  | δEu  | δCe    |
|----------|------|--------|------|----------|-------|--------|---------|--------|---------|-----------|----------|------|--------|
| ZB2-1-1  | 1863 | 325.09 | 1.24 | 0.000463 | 71.77 | 30.11  | 956.39  | 48.98  | 907.41  | 0.05      | 0.000251 | 0.65 | 94.54  |
| ZB2-1-2  | 1831 | 291.31 | 0.78 | 0.000114 | 48.38 | 181.63 | 555.22  | 18.24  | 536.98  | 0.03      | 0.001028 | 0.33 | 16.72  |
| ZB2-1-3  | 290  | 155.88 | 0.94 | 0.000189 | 64.64 | 82.01  | 858.01  | 20.47  | 837.54  | 0.02      | 0.000000 | 0.26 | -      |
| ZB2-1-4  | 293  | 167.70 | 0.78 | 0.000854 | 27.72 | 42.23  | 1333.87 | 35.47  | 1298.40 | 0.03      | 0.000182 | 0.10 | 48.73  |
| ZB2-1-5  | 2521 | 209.77 | 0.88 | 0.000153 | 58.54 | 111.65 | 495.71  | 24.73  | 470.98  | 0.05      | 0.000720 | 0.29 | 34.92  |
| ZB2-1-6  | 312  | 121.63 | 0.92 | 0.001481 | 27.43 | 24.61  | 1879.18 | 52.97  | 1826.21 | 0.03      | 0.000007 | 0.04 | 410.04 |
| ZB2-1-7  | 289  | 94.58  | 1.90 | 0.000590 | 74.75 | 22.69  | 1385.69 | 96.87  | 1288.82 | 0.08      | 0.000033 | 0.54 | 278.76 |
| ZB2-1-8  | 1986 | 167.43 | 0.61 | 0.000319 | 24.14 | 130.06 | 894.44  | 18.17  | 876.27  | 0.02      | 0.000300 | 0.33 | 22.91  |
| ZB2-1-9  | 287  | 70.39  | 0.84 | 0.000163 | 50.40 | 121.54 | 943.73  | 142.71 | 801.02  | 0.18      | 0.042855 | 0.23 | 1.48   |
| ZB2-1-11 | 287  | 176.32 | 0.58 | 0.000451 | 16.19 | 137.00 | 1128.09 | 25.27  | 1102.82 | 0.02      | 0.000000 | 0.14 | -      |
| ZB2-1-12 | 1859 | 139.55 | 1.07 | 0.000417 | 37.63 | 63.77  | 855.67  | 63.84  | 791.83  | 0.08      | 0.000105 | 0.32 | 231.39 |
| ZB2-1-13 | 2020 | 213.11 | 1.43 | 0.000770 | 62.93 | 20.63  | 1282.06 | 72.51  | 1209.55 | 0.06      | 0.000000 | 0.53 | -      |
| ZB2-1-14 | 294  | 75.03  | 0.65 | 0.000813 | 51.06 | 24.09  | 1333.07 | 29.44  | 1303.63 | 0.02      | 0.000235 | 0.24 | 15.78  |
| ZB2-1-15 | 2526 | 225.75 | 0.88 | 0.000786 | 13.50 | 94.32  | 1315.27 | 80.59  | 1234.68 | 0.07      | 0.000009 | 0.33 | 950.85 |
| ZB2-1-17 | 1859 | 63.23  | 0.88 | 0.000223 | 56.57 | 79.39  | 1923.53 | 37.62  | 1885.91 | 0.02      | 0.000282 | 0.28 | 6.73   |
| ZB2-1-18 | 308  | 108.84 | 0.76 | 0.000095 | 53.85 | 196.33 | 460.56  | 15.83  | 444.73  | 0.04      | 0.000000 | 0.46 | -      |
| ZB2-1-19 | 1897 | 110.74 | 1.23 | 0.000269 | 51.30 | 72.34  | 780.93  | 66.74  | 714.19  | 0.09      | 0.000000 | 0.41 | -      |
| ZB2-1-20 | 317  | 35.82  | 2.57 | 0.000351 | 91.41 | 31.13  | 2567.51 | 178.01 | 2389.50 | 0.07      | 0.000186 | 0.59 | 37.33  |
| ZB2-1-21 | 2523 | 148.46 | 1.34 | 0.000447 | 38.94 | 57.44  | 1153.23 | 70.78  | 1082.45 | 0.07      | 0.000405 | 0.28 | 73.89  |
| ZB2-1-23 | 281  | 125.90 | 1.10 | 0.000238 | 29.26 | 143.88 | 1133.74 | 49.14  | 1084.60 | 0.05      | 0.000020 | 0.43 | 251.65 |
| ZB2-1-24 | 2507 | 80.80  | 1.09 | 0.000436 | 44.92 | 51.00  | 1678.76 | 41.12  | 1637.64 | 0.03      | 0.000171 | 0.30 | 21.60  |
| ZB2-1-25 | 293  | 228.67 | 1.02 | 0.000375 | 44.65 | 59.79  | 1654.79 | 47.62  | 1607.17 | 0.03      | 0.000000 | 0.33 | -      |
| ZB2-1-26 | 2504 | 168.12 | 0.59 | 0.000353 | 19.97 | 141.97 | 1089.78 | 20.26  | 1069.52 | 0.02      | 0.000002 | 0.20 | 276.24 |
| ZB2-1-27 | 288  | 109.94 | 0.80 | 0.000172 | 45.27 | 128.76 | 1260.19 | 34.74  | 1225.45 | 0.03      | 0.000010 | 0.13 | 203.37 |
| ZB2-1-28 | 292  | 131.34 | 1.19 | 0.000268 | 29.43 | 126.80 | 1021.03 | 62.07  | 958.96  | 0.06      | 0.000030 | 0.25 | 340.32 |
| ZB2-1-30 | 1905 | 110.21 | 0.91 | 0.001097 | 30.68 | 29.71  | 2007.42 | 47.40  | 1960.02 | 0.02      | 0.000104 | 0.05 | 60.40  |
| ZB2-1-31 | 1860 | 145.75 | 1.08 | 0.000175 | 58.05 | 98.45  | 1132.44 | 24.32  | 1108.12 | 0.02      | 0.000039 | 0.49 | 69.43  |

|          |      |        |      |          |       |        |         |        |         |      |          |      |         |
|----------|------|--------|------|----------|-------|--------|---------|--------|---------|------|----------|------|---------|
| ZB2-1-33 | 2544 | 22.37  | 0.73 | 0.000323 | 30.19 | 102.56 | 1835.71 | 400.61 | 1435.10 | 0.28 | 0.075890 | 0.12 | 1.14    |
| ZB2-1-34 | 1989 | 230.44 | 0.63 | 0.000413 | 16.40 | 147.76 | 807.79  | 26.15  | 781.64  | 0.03 | 0.000031 | 0.08 | 214.23  |
| ZB2-1-36 | 385  | 141.31 | 0.71 | 0.000097 | 44.35 | 231.62 | 459.65  | 17.23  | 442.42  | 0.04 | 0.000000 | 0.34 | -       |
| ZB2-1-37 | 2107 | 61.09  | 1.21 | 0.000305 | 68.96 | 47.54  | 887.74  | 65.85  | 821.89  | 0.08 | 0.000000 | 0.28 | -       |
| ZB2-1-38 | 1870 | 233.27 | 1.07 | 0.000475 | 22.60 | 93.11  | 1240.67 | 64.27  | 1176.40 | 0.05 | 0.000000 | 0.39 | -       |
| ZB2-1-39 | 2562 | 112.38 | 1.02 | 0.000187 | 83.37 | 64.26  | 542.34  | 31.28  | 511.06  | 0.06 | 0.000000 | 0.31 | -       |
| ZB2-1-40 | 1972 | 56.43  | 1.32 | 0.001719 | 24.80 | 23.45  | 1996.21 | 90.74  | 1905.47 | 0.05 | 0.000000 | 0.02 | -       |
| ZB2-1-41 | 283  | 129.90 | 1.32 | 0.000226 | 49.72 | 89.14  | 698.78  | 43.60  | 655.18  | 0.07 | 0.000556 | 0.33 | 53.02   |
| ZB2-1-42 | 292  | 169.10 | 1.50 | 0.000598 | 37.82 | 44.23  | 1338.56 | 78.38  | 1260.18 | 0.06 | 0.000000 | 0.34 | -       |
| ZB2-1-43 | 2587 | 100.23 | 2.01 | 0.000363 | 60.86 | 45.25  | 1958.65 | 99.36  | 1859.29 | 0.05 | 0.000019 | 0.69 | 256.31  |
| ZB2-1-44 | 2676 | 168.32 | 0.62 | 0.000412 | 17.07 | 142.10 | 1075.47 | 20.07  | 1055.40 | 0.02 | 0.000058 | 0.24 | 61.60   |
| ZB2-1-45 | 304  | 109.22 | 1.54 | 0.000523 | 40.91 | 46.78  | 1426.86 | 106.78 | 1320.08 | 0.08 | 0.000000 | 0.49 | -       |
| ZB2-1-46 | 2502 | 148.54 | 0.64 | 0.000654 | 22.10 | 69.22  | 1134.59 | 25.06  | 1109.53 | 0.02 | 0.000000 | 0.17 | -       |
| ZB2-1-47 | 1871 | 213.90 | 1.10 | 0.000232 | 34.81 | 123.60 | 914.03  | 33.43  | 880.60  | 0.04 | 0.000002 | 0.71 | 616.73  |
| ZB2-1-48 | 1962 | 45.51  | 2.10 | 0.000514 | 88.74 | 21.90  | 3539.69 | 207.59 | 3332.10 | 0.06 | 0.000107 | 0.59 | 64.84   |
| ZB2-1-50 | 293  | 277.81 | 0.64 | 0.000168 | 30.00 | 198.02 | 808.16  | 20.71  | 787.45  | 0.03 | 0.000069 | 0.25 | 94.63   |
| ZB2-1-52 | 316  | 201.12 | 0.68 | 0.000146 | 38.24 | 179.66 | 989.71  | 21.34  | 968.37  | 0.02 | 0.000011 | 0.21 | 182.67  |
| ZB2-1-53 | 291  | 219.87 | 0.99 | 0.000315 | 49.15 | 64.63  | 1153.52 | 31.98  | 1121.54 | 0.03 | 0.000000 | 0.28 | -       |
| ZB2-1-54 | 292  | 99.60  | 1.04 | 0.000180 | 66.91 | 83.25  | 519.30  | 49.90  | 469.40  | 0.11 | 0.000000 | 0.77 | -       |
| ZB2-1-55 | 1931 | 137.27 | 0.63 | 0.000200 | 84.27 | 59.47  | 1283.22 | 16.27  | 1266.95 | 0.01 | 0.000000 | 0.17 | -       |
| ZB2-1-56 | 297  | 39.26  | 0.53 | 0.000103 | 96.95 | 100.39 | 921.06  | 20.94  | 900.12  | 0.02 | 0.000069 | 0.07 | 7.62    |
| ZB2-1-57 | 2531 | 373.56 | 0.96 | 0.000306 | 48.58 | 67.37  | 697.42  | 56.07  | 641.35  | 0.09 | 0.000000 | 0.52 | -       |
| ZB2-1-58 | 1950 | 91.28  | 1.41 | 0.000116 | 61.38 | 140.82 | 810.34  | 33.80  | 776.54  | 0.04 | 0.000034 | 0.71 | 98.80   |
| ZB2-1-59 | 2503 | 89.67  | 1.03 | 0.000735 | 46.22 | 29.43  | 1980.25 | 54.86  | 1925.39 | 0.03 | 0.000105 | 0.18 | 54.67   |
| ZB2-1-60 | 292  | 285.70 | 0.62 | 0.000134 | 29.29 | 255.37 | 624.99  | 15.84  | 609.15  | 0.03 | 0.000042 | 0.25 | 136.42  |
| ZB2-1-61 | 299  | 94.52  | 1.32 | 0.000191 | 56.48 | 92.63  | 900.81  | 42.36  | 858.45  | 0.05 | 0.000039 | 0.79 | 126.68  |
| ZB2-1-62 | 2570 | 92.19  | 1.15 | 0.000163 | 33.11 | 185.46 | 561.84  | 38.83  | 523.01  | 0.07 | 0.000000 | 0.51 | -       |
| ZB2-1-63 | 293  | 94.77  | 0.68 | 0.000424 | 25.90 | 91.00  | 1570.49 | 34.76  | 1535.73 | 0.02 | 0.000000 | 0.15 | -       |
| ZB2-1-64 | 2567 | 96.35  | 0.86 | 0.000237 | 48.19 | 87.69  | 1427.79 | 48.32  | 1379.47 | 0.04 | 0.004142 | 0.34 | 3.02    |
| ZB2-1-65 | 300  | 123.46 | 1.16 | 0.000563 | 24.50 | 72.50  | 1898.56 | 85.77  | 1812.79 | 0.05 | 0.000001 | 0.33 | 1429.38 |

|          |      |        |      |          |       |        |         |        |         |      |          |      |        |
|----------|------|--------|------|----------|-------|--------|---------|--------|---------|------|----------|------|--------|
| ZB2-1-66 | 322  | 602.98 | 0.56 | 0.000825 | 20.54 | 58.98  | 1527.74 | 58.37  | 1469.37 | 0.04 | 0.000019 | 0.54 | 555.10 |
| ZB2-1-67 | 305  | 107.79 | 1.31 | 0.000907 | 45.85 | 24.05  | 1607.22 | 69.39  | 1537.83 | 0.05 | 0.000012 | 0.11 | 375.01 |
| ZB2-1-68 | 297  | 59.37  | 2.55 | 0.000555 | 82.65 | 21.82  | 2150.83 | 148.83 | 2002.00 | 0.07 | 0.000094 | 0.57 | 90.90  |
| ZB2-1-69 | 300  | 111.13 | 1.17 | 0.000279 | 39.10 | 91.51  | 914.95  | 58.49  | 856.46  | 0.07 | 0.000025 | 0.35 | 329.61 |
| ZB2-1-70 | 402  | 116.12 | 0.97 | 0.000270 | 49.96 | 74.17  | 1335.04 | 41.40  | 1293.64 | 0.03 | 0.000001 | 0.55 | 860.09 |
| ZB2-1-71 | 2535 | 83.13  | 1.17 | 0.000267 | 66.75 | 56.04  | 1674.86 | 57.57  | 1617.29 | 0.04 | 0.000043 | 0.34 | 71.25  |
| ZB2-1-72 | 291  | 104.65 | 0.28 | 0.000120 | 32.70 | 254.89 | 177.53  | 6.66   | 170.87  | 0.04 | 0.000000 | 0.13 | -      |
| ZB2-1-73 | 1901 | 116.39 | 1.58 | 0.000255 | 58.25 | 67.39  | 674.24  | 59.78  | 614.46  | 0.10 | 0.000007 | 0.43 | 863.30 |
| ZB2-1-74 | 307  | 214.09 | 0.74 | 0.000164 | 41.87 | 146.04 | 825.31  | 22.09  | 803.22  | 0.03 | 0.000000 | 0.27 | -      |
| ZB2-1-75 | 286  | 105.24 | 0.99 | 0.000782 | 29.75 | 42.99  | 1366.53 | 37.57  | 1328.96 | 0.03 | 0.000257 | 0.13 | 31.71  |
| ZB2-1-77 | 292  | 165.10 | 0.68 | 0.000226 | 33.82 | 130.94 | 995.76  | 20.97  | 974.79  | 0.02 | 0.000001 | 0.39 | 393.71 |
| ZB2-1-78 | 1892 | 118.48 | 1.14 | 0.000304 | 35.95 | 91.52  | 1010.22 | 50.92  | 959.30  | 0.05 | 0.000011 | 0.69 | 343.66 |
| ZB2-1-79 | 374  | 127.36 | 1.04 | 0.000521 | 38.11 | 50.36  | 1307.98 | 59.29  | 1248.69 | 0.05 | 0.001685 | 0.19 | 14.41  |
| ZB2-1-80 | 1894 | 163.96 | 0.98 | 0.000636 | 20.82 | 75.48  | 1548.90 | 77.60  | 1471.30 | 0.05 | 0.000028 | 0.27 | 333.00 |
| ZB2-1-81 | 297  | 63.48  | 1.48 | 0.000297 | 49.39 | 68.08  | 1171.58 | 62.12  | 1109.46 | 0.06 | 0.000089 | 0.78 | 78.34  |
| ZB2-1-82 | 2897 | 260.72 | 0.34 | 0.000090 | 38.25 | 289.49 | 547.30  | 7.73   | 539.57  | 0.01 | 0.000011 | 0.22 | 124.98 |
| ZB2-1-83 | 317  | 131.00 | 0.92 | 0.000496 | 27.39 | 73.58  | 1600.48 | 47.70  | 1552.78 | 0.03 | 0.000192 | 0.33 | 46.96  |
| ZB2-1-84 | 2547 | 82.99  | 2.13 | 0.000518 | 66.65 | 28.95  | 2721.40 | 162.40 | 2559.00 | 0.06 | 0.000068 | 0.56 | 131.92 |
| ZB2-1-85 | 288  | 149.49 | 0.71 | 0.001705 | 19.34 | 30.33  | 2252.44 | 49.66  | 2202.78 | 0.02 | 0.000030 | 0.02 | 132.11 |
| ZB2-1-86 | 2530 | 44.23  | 1.32 | 0.000551 | 57.82 | 31.39  | 1523.21 | 250.04 | 1273.17 | 0.20 | 0.045061 | 0.15 | 1.61   |
| ZB2-1-87 | 2528 | 22.67  | 1.33 | 0.000426 | 36.63 | 64.13  | 1750.87 | 500.30 | 1250.57 | 0.40 | 0.099168 | 0.29 | 1.55   |
| ZB2-1-88 | 285  | 140.55 | 0.61 | 0.000638 | 16.35 | 95.81  | 1208.13 | 45.24  | 1162.89 | 0.04 | 0.000000 | 0.06 | -      |
| ZB2-1-90 | 1879 | 180.84 | 0.90 | 0.000921 | 13.46 | 80.71  | 1509.85 | 74.11  | 1435.74 | 0.05 | 0.000987 | 0.28 | 22.16  |
| ZB2-1-91 | 1910 | 65.48  | 1.08 | 0.000623 | 40.83 | 39.29  | 1646.74 | 43.70  | 1603.04 | 0.03 | 0.000166 | 0.17 | 28.26  |
| ZB2-1-92 | 296  | 114.48 | 1.21 | 0.000370 | 62.04 | 43.53  | 935.80  | 26.31  | 909.49  | 0.03 | 0.000000 | 0.18 | -      |
| ZB2-1-93 | 302  | 296.73 | 0.72 | 0.000146 | 46.75 | 146.88 | 694.54  | 19.43  | 675.11  | 0.03 | 0.000000 | 0.32 | -      |
| ZB2-1-94 | 310  | 171.22 | 0.64 | 0.000242 | 21.55 | 191.93 | 806.74  | 20.71  | 786.03  | 0.03 | 0.000000 | 0.35 | -      |
| ZB2-1-95 | 294  | 117.12 | 1.05 | 0.000259 | 51.72 | 74.57  | 1290.80 | 32.33  | 1258.47 | 0.03 | 0.000024 | 0.48 | 84.56  |
| ZB2-1-97 | 1923 | 115.81 | 0.79 | 0.000535 | 25.53 | 73.28  | 1089.03 | 41.50  | 1047.53 | 0.04 | 0.000079 | 0.12 | 113.31 |
| ZB2-1-98 | 364  | 96.94  | 1.73 | 0.000565 | 44.57 | 39.71  | 1964.02 | 117.87 | 1846.15 | 0.06 | 0.000010 | 0.53 | 400.13 |



|           |      |        |      |          |       |        |         |        |         |      |          |      |        |
|-----------|------|--------|------|----------|-------|--------|---------|--------|---------|------|----------|------|--------|
| ZB2-1-99  | 2497 | 151.39 | 0.34 | 0.000055 | 51.07 | 353.72 | 639.37  | 7.06   | 632.31  | 0.01 | 0.000000 | 0.20 | -      |
| ZB2-1-100 | 2620 | 110.19 | 1.21 | 0.000220 | 51.42 | 88.35  | 717.84  | 58.39  | 659.45  | 0.09 | 0.000000 | 0.54 | -      |
| ZB2-1-101 | 2517 | 97.44  | 1.34 | 0.000230 | 56.07 | 77.52  | 1564.56 | 75.95  | 1488.61 | 0.05 | 0.000048 | 0.45 | 134.02 |
| ZB2-1-102 | 292  | 31.58  | 1.09 | 0.000067 | 97.21 | 153.43 | 435.97  | 33.38  | 402.59  | 0.08 | 0.000101 | 0.36 | 78.52  |
| ZB2-1-103 | 1871 | 145.65 | 0.62 | 0.000074 | 41.09 | 328.32 | 663.26  | 8.36   | 654.90  | 0.01 | 0.000026 | 0.82 | 21.56  |
| ZB2-1-104 | 1875 | 151.84 | 0.62 | 0.000510 | 21.46 | 91.38  | 968.99  | 28.53  | 940.46  | 0.03 | 0.000158 | 0.18 | 58.38  |
| ZB2-1-105 | 1886 | 147.43 | 0.44 | 0.000232 | 11.80 | 364.57 | 716.99  | 13.94  | 703.05  | 0.02 | 0.000000 | 0.18 | -      |
| ZB2-1-106 | 389  | 298.66 | 0.62 | 0.000179 | 29.73 | 188.37 | 885.34  | 20.66  | 864.68  | 0.02 | 0.000000 | 0.25 | -      |
| ZB2-1-107 | 1892 | 116.28 | 1.53 | 0.000432 | 43.79 | 52.83  | 1178.84 | 63.16  | 1115.68 | 0.06 | 0.000025 | 0.50 | 268.43 |
| ZB2-1-108 | 377  | 98.47  | 0.97 | 0.000308 | 50.32 | 64.55  | 1004.44 | 23.27  | 981.17  | 0.02 | 0.000000 | 0.19 | -      |
| ZB2-1-109 | 297  | 141.76 | 0.71 | 0.000541 | 18.35 | 100.70 | 1424.87 | 40.21  | 1384.66 | 0.03 | 0.000000 | 0.25 | -      |
| ZB2-1-110 | 296  | 74.32  | 0.83 | 0.000086 | 57.38 | 202.00 | 975.86  | 21.81  | 954.05  | 0.02 | 0.000039 | 0.51 | 25.94  |
| ZB2-2-1   | 303  | 325.09 | 1.24 | 0.000463 | 71.77 | 30.11  | 956.39  | 48.98  | 907.41  | 0.05 | 0.000251 | 0.65 | 94.54  |
| ZB2-2-2   | 291  | 291.31 | 0.78 | 0.000114 | 48.38 | 181.63 | 555.22  | 18.24  | 536.98  | 0.03 | 0.001028 | 0.33 | 16.72  |
| ZB2-2-3   | 290  | 155.88 | 0.94 | 0.000189 | 64.64 | 82.01  | 858.01  | 20.47  | 837.54  | 0.02 | 0.000000 | 0.26 | -      |
| ZB2-2-4   | 286  | 167.70 | 0.78 | 0.000854 | 27.72 | 42.23  | 1333.87 | 35.47  | 1298.40 | 0.03 | 0.000182 | 0.10 | 48.73  |
| ZB2-2-5   | 297  | 209.77 | 0.88 | 0.000153 | 58.54 | 111.65 | 495.71  | 24.73  | 470.98  | 0.05 | 0.000720 | 0.29 | 34.92  |
| ZB2-2-6   | 290  | 121.63 | 0.92 | 0.001481 | 27.43 | 24.61  | 1879.18 | 52.97  | 1826.21 | 0.03 | 0.000007 | 0.04 | 410.04 |
| ZB2-2-7   | 288  | 94.58  | 1.90 | 0.000590 | 74.75 | 22.69  | 1385.69 | 96.87  | 1288.82 | 0.08 | 0.000033 | 0.54 | 278.76 |
| ZB2-2-8   | 286  | 167.43 | 0.61 | 0.000319 | 24.14 | 130.06 | 894.44  | 18.17  | 876.27  | 0.02 | 0.000300 | 0.33 | 22.91  |
| ZB2-2-9   | 284  | 70.39  | 0.84 | 0.000163 | 50.40 | 121.54 | 943.73  | 142.71 | 801.02  | 0.18 | 0.042855 | 0.23 | 1.48   |
| ZB2-2-10  | 289  | 135.23 | 1.28 | 0.000291 | 35.23 | 97.38  | 882.55  | 50.72  | 831.83  | 0.06 | 0.000077 | 0.46 | 132.29 |
| ZB2-2-11  | 296  | 176.32 | 0.58 | 0.000451 | 16.19 | 137.00 | 1128.09 | 25.27  | 1102.82 | 0.02 | 0.000000 | 0.14 | -      |
| ZB2-2-12  | 285  | 139.55 | 1.07 | 0.000417 | 37.63 | 63.77  | 855.67  | 63.84  | 791.83  | 0.08 | 0.000105 | 0.32 | 231.39 |
| ZB2-2-13  | 300  | 213.11 | 1.43 | 0.000770 | 62.93 | 20.63  | 1282.06 | 72.51  | 1209.55 | 0.06 | 0.000000 | 0.53 | -      |
| ZB2-2-14  | 299  | 75.03  | 0.65 | 0.000813 | 51.06 | 24.09  | 1333.07 | 29.44  | 1303.63 | 0.02 | 0.000235 | 0.24 | 15.78  |
| ZB2-2-15  | 289  | 225.75 | 0.88 | 0.000786 | 13.50 | 94.32  | 1315.27 | 80.59  | 1234.68 | 0.07 | 0.000009 | 0.33 | 950.85 |
| ZB2-2-16  | 286  | 111.50 | 1.47 | 0.000716 | 37.25 | 37.51  | 1743.32 | 117.34 | 1625.98 | 0.07 | 0.000023 | 0.29 | 355.13 |
| ZB2-2-17  | 292  | 63.23  | 0.88 | 0.000223 | 56.57 | 79.39  | 1923.53 | 37.62  | 1885.91 | 0.02 | 0.000282 | 0.28 | 6.73   |

|          |      |        |      |          |       |        |         |        |         |      |          |      |        |
|----------|------|--------|------|----------|-------|--------|---------|--------|---------|------|----------|------|--------|
| ZB2-2-18 | 286  | 108.84 | 0.76 | 0.000095 | 53.85 | 196.33 | 460.56  | 15.83  | 444.73  | 0.04 | 0.000000 | 0.46 | -      |
| ZB2-2-19 | 288  | 110.74 | 1.23 | 0.000269 | 51.30 | 72.34  | 780.93  | 66.74  | 714.19  | 0.09 | 0.000000 | 0.41 | -      |
| ZB2-2-20 | 293  | 35.82  | 2.57 | 0.000351 | 91.41 | 31.13  | 2567.51 | 178.01 | 2389.50 | 0.07 | 0.000186 | 0.59 | 37.33  |
| ZB2-2-21 | 297  | 148.46 | 1.34 | 0.000447 | 38.94 | 57.44  | 1153.23 | 70.78  | 1082.45 | 0.07 | 0.000405 | 0.28 | 73.89  |
| ZB2-2-23 | 292  | 125.90 | 1.10 | 0.000238 | 29.26 | 143.88 | 1133.74 | 49.14  | 1084.60 | 0.05 | 0.000020 | 0.43 | 251.65 |
| ZB2-2-24 | 289  | 80.80  | 1.09 | 0.000436 | 44.92 | 51.00  | 1678.76 | 41.12  | 1637.64 | 0.03 | 0.000171 | 0.30 | 21.60  |
| ZB2-2-25 | 291  | 228.67 | 1.02 | 0.000375 | 44.65 | 59.79  | 1654.79 | 47.62  | 1607.17 | 0.03 | 0.000000 | 0.33 | -      |
| ZB2-2-26 | 291  | 168.12 | 0.59 | 0.000353 | 19.97 | 141.97 | 1089.78 | 20.26  | 1069.52 | 0.02 | 0.000002 | 0.20 | 276.24 |
| ZB2-2-27 | 292  | 109.94 | 0.80 | 0.000172 | 45.27 | 128.76 | 1260.19 | 34.74  | 1225.45 | 0.03 | 0.000010 | 0.13 | 203.37 |
| ZB2-2-28 | 296  | 131.34 | 1.19 | 0.000268 | 29.43 | 126.80 | 1021.03 | 62.07  | 958.96  | 0.06 | 0.000030 | 0.25 | 340.32 |
| ZB2-2-30 | 292  | 110.21 | 0.91 | 0.001097 | 30.68 | 29.71  | 2007.42 | 47.40  | 1960.02 | 0.02 | 0.000104 | 0.05 | 60.40  |
| ZB2-2-31 | 284  | 145.75 | 1.08 | 0.000175 | 58.05 | 98.45  | 1132.44 | 24.32  | 1108.12 | 0.02 | 0.000039 | 0.49 | 69.43  |
| ZB2-2-32 | 359  | 283.74 | 0.83 | 0.000356 | 81.52 | 34.44  | 1631.38 | 50.47  | 1580.91 | 0.03 | 0.000000 | 0.66 | -      |
| ZB2-2-33 | 293  | 22.37  | 0.73 | 0.000323 | 30.19 | 102.56 | 1835.71 | 400.61 | 1435.10 | 0.28 | 0.075890 | 0.12 | 1.14   |
| ZB2-2-34 | 292  | 230.44 | 0.63 | 0.000413 | 16.40 | 147.76 | 807.79  | 26.15  | 781.64  | 0.03 | 0.000031 | 0.08 | 214.23 |
| ZB2-2-36 | 283  | 141.31 | 0.71 | 0.000097 | 44.35 | 231.62 | 459.65  | 17.23  | 442.42  | 0.04 | 0.000000 | 0.34 | -      |
| ZB2-2-37 | 2529 | 61.09  | 1.21 | 0.000305 | 68.96 | 47.54  | 887.74  | 65.85  | 821.89  | 0.08 | 0.000000 | 0.28 | -      |
| ZB2-2-38 | 280  | 233.27 | 1.07 | 0.000475 | 22.60 | 93.11  | 1240.67 | 64.27  | 1176.40 | 0.05 | 0.000000 | 0.39 | -      |
| ZB2-2-39 | 378  | 112.38 | 1.02 | 0.000187 | 83.37 | 64.26  | 542.34  | 31.28  | 511.06  | 0.06 | 0.000000 | 0.31 | -      |
| ZB2-2-40 | 289  | 56.43  | 1.32 | 0.001719 | 24.80 | 23.45  | 1996.21 | 90.74  | 1905.47 | 0.05 | 0.000000 | 0.02 | -      |
| ZB2-2-41 | 302  | 129.90 | 1.32 | 0.000226 | 49.72 | 89.14  | 698.78  | 43.60  | 655.18  | 0.07 | 0.000556 | 0.33 | 53.02  |
| ZB2-2-42 | 293  | 169.10 | 1.50 | 0.000598 | 37.82 | 44.23  | 1338.56 | 78.38  | 1260.18 | 0.06 | 0.000000 | 0.34 | -      |
| ZB2-2-43 | 293  | 100.23 | 2.01 | 0.000363 | 60.86 | 45.25  | 1958.65 | 99.36  | 1859.29 | 0.05 | 0.000019 | 0.69 | 256.31 |
| ZB2-2-44 | 299  | 168.32 | 0.62 | 0.000412 | 17.07 | 142.10 | 1075.47 | 20.07  | 1055.40 | 0.02 | 0.000058 | 0.24 | 61.60  |
| ZB2-2-45 | 286  | 109.22 | 1.54 | 0.000523 | 40.91 | 46.78  | 1426.86 | 106.78 | 1320.08 | 0.08 | 0.000000 | 0.49 | -      |
| ZB2-2-46 | 295  | 148.54 | 0.64 | 0.000654 | 22.10 | 69.22  | 1134.59 | 25.06  | 1109.53 | 0.02 | 0.000000 | 0.17 | -      |
| ZB2-2-47 | 301  | 213.90 | 1.10 | 0.000232 | 34.81 | 123.60 | 914.03  | 33.43  | 880.60  | 0.04 | 0.000002 | 0.71 | 616.73 |
| ZB2-2-48 | 291  | 45.51  | 2.10 | 0.000514 | 88.74 | 21.90  | 3539.69 | 207.59 | 3332.10 | 0.06 | 0.000107 | 0.59 | 64.84  |
| ZB2-2-50 | 289  | 277.81 | 0.64 | 0.000168 | 30.00 | 198.02 | 808.16  | 20.71  | 787.45  | 0.03 | 0.000069 | 0.25 | 94.63  |
| ZB2-2-52 | 279  | 201.12 | 0.68 | 0.000146 | 38.24 | 179.66 | 989.71  | 21.34  | 968.37  | 0.02 | 0.000011 | 0.21 | 182.67 |

|          |      |        |      |          |       |        |         |        |         |      |          |      |         |
|----------|------|--------|------|----------|-------|--------|---------|--------|---------|------|----------|------|---------|
| ZB2-2-53 | 283  | 219.87 | 0.99 | 0.000315 | 49.15 | 64.63  | 1153.52 | 31.98  | 1121.54 | 0.03 | 0.000000 | 0.28 | -       |
| ZB2-2-54 | 334  | 99.60  | 1.04 | 0.000180 | 66.91 | 83.25  | 519.30  | 49.90  | 469.40  | 0.11 | 0.000000 | 0.77 | -       |
| ZB2-2-55 | 300  | 137.27 | 0.63 | 0.000200 | 84.27 | 59.47  | 1283.22 | 16.27  | 1266.95 | 0.01 | 0.000000 | 0.17 | -       |
| ZB2-2-56 | 1874 | 39.26  | 0.53 | 0.000103 | 96.95 | 100.39 | 921.06  | 20.94  | 900.12  | 0.02 | 0.000069 | 0.07 | 7.62    |
| ZB2-2-57 | 292  | 373.56 | 0.96 | 0.000306 | 48.58 | 67.37  | 697.42  | 56.07  | 641.35  | 0.09 | 0.000000 | 0.52 | -       |
| ZB2-2-58 | 301  | 91.28  | 1.41 | 0.000116 | 61.38 | 140.82 | 810.34  | 33.80  | 776.54  | 0.04 | 0.000034 | 0.71 | 98.80   |
| ZB2-2-59 | 288  | 89.67  | 1.03 | 0.000735 | 46.22 | 29.43  | 1980.25 | 54.86  | 1925.39 | 0.03 | 0.000105 | 0.18 | 54.67   |
| ZB2-2-60 | 283  | 285.70 | 0.62 | 0.000134 | 29.29 | 255.37 | 624.99  | 15.84  | 609.15  | 0.03 | 0.000042 | 0.25 | 136.42  |
| ZB2-2-61 | 292  | 94.52  | 1.32 | 0.000191 | 56.48 | 92.63  | 900.81  | 42.36  | 858.45  | 0.05 | 0.000039 | 0.79 | 126.68  |
| ZB2-2-62 | 284  | 92.19  | 1.15 | 0.000163 | 33.11 | 185.46 | 561.84  | 38.83  | 523.01  | 0.07 | 0.000000 | 0.51 | -       |
| ZB2-2-63 | 290  | 94.77  | 0.68 | 0.000424 | 25.90 | 91.00  | 1570.49 | 34.76  | 1535.73 | 0.02 | 0.000000 | 0.15 | -       |
| ZB2-2-64 | 299  | 96.35  | 0.86 | 0.000237 | 48.19 | 87.69  | 1427.79 | 48.32  | 1379.47 | 0.04 | 0.004142 | 0.34 | 3.02    |
| ZB2-2-65 | 286  | 123.46 | 1.16 | 0.000563 | 24.50 | 72.50  | 1898.56 | 85.77  | 1812.79 | 0.05 | 0.000001 | 0.33 | 1429.38 |
| ZB2-2-66 | 370  | 602.98 | 0.56 | 0.000825 | 20.54 | 58.98  | 1527.74 | 58.37  | 1469.37 | 0.04 | 0.000019 | 0.54 | 555.10  |
| ZB2-2-67 | 282  | 107.79 | 1.31 | 0.000907 | 45.85 | 24.05  | 1607.22 | 69.39  | 1537.83 | 0.05 | 0.000012 | 0.11 | 375.01  |
| ZB2-2-68 | 305  | 59.37  | 2.55 | 0.000555 | 82.65 | 21.82  | 2150.83 | 148.83 | 2002.00 | 0.07 | 0.000094 | 0.57 | 90.90   |
| ZB2-2-69 | 292  | 111.13 | 1.17 | 0.000279 | 39.10 | 91.51  | 914.95  | 58.49  | 856.46  | 0.07 | 0.000025 | 0.35 | 329.61  |
| ZB2-2-70 | 292  | 116.12 | 0.97 | 0.000270 | 49.96 | 74.17  | 1335.04 | 41.40  | 1293.64 | 0.03 | 0.000001 | 0.55 | 860.09  |
| ZB2-2-71 | 294  | 83.13  | 1.17 | 0.000267 | 66.75 | 56.04  | 1674.86 | 57.57  | 1617.29 | 0.04 | 0.000043 | 0.34 | 71.25   |
| ZB2-2-72 | 1824 | 104.65 | 0.28 | 0.000120 | 32.70 | 254.89 | 177.53  | 6.66   | 170.87  | 0.04 | 0.000000 | 0.13 | -       |
| ZB2-2-73 | 295  | 116.39 | 1.58 | 0.000255 | 58.25 | 67.39  | 674.24  | 59.78  | 614.46  | 0.10 | 0.000007 | 0.43 | 863.30  |
| ZB2-2-74 | 290  | 214.09 | 0.74 | 0.000164 | 41.87 | 146.04 | 825.31  | 22.09  | 803.22  | 0.03 | 0.000000 | 0.27 | -       |
| ZB2-2-75 | 290  | 105.24 | 0.99 | 0.000782 | 29.75 | 42.99  | 1366.53 | 37.57  | 1328.96 | 0.03 | 0.000257 | 0.13 | 31.71   |
| ZB2-2-77 | 280  | 165.10 | 0.68 | 0.000226 | 33.82 | 130.94 | 995.76  | 20.97  | 974.79  | 0.02 | 0.000001 | 0.39 | 393.71  |
| ZB2-2-78 | 291  | 118.48 | 1.14 | 0.000304 | 35.95 | 91.52  | 1010.22 | 50.92  | 959.30  | 0.05 | 0.000011 | 0.69 | 343.66  |
| ZB2-2-79 | 286  | 127.36 | 1.04 | 0.000521 | 38.11 | 50.36  | 1307.98 | 59.29  | 1248.69 | 0.05 | 0.001685 | 0.19 | 14.41   |
| ZB2-2-80 | 283  | 163.96 | 0.98 | 0.000636 | 20.82 | 75.48  | 1548.90 | 77.60  | 1471.30 | 0.05 | 0.000028 | 0.27 | 333.00  |
| ZB2-2-81 | 288  | 63.48  | 1.48 | 0.000297 | 49.39 | 68.08  | 1171.58 | 62.12  | 1109.46 | 0.06 | 0.000089 | 0.78 | 78.34   |
| ZB2-2-82 | 294  | 260.72 | 0.34 | 0.000090 | 38.25 | 289.49 | 547.30  | 7.73   | 539.57  | 0.01 | 0.000011 | 0.22 | 124.98  |
| ZB2-2-83 | 292  | 131.00 | 0.92 | 0.000496 | 27.39 | 73.58  | 1600.48 | 47.70  | 1552.78 | 0.03 | 0.000192 | 0.33 | 46.96   |

|           |      |         |         |          |         |         |         |        |         |      |          |      |        |
|-----------|------|---------|---------|----------|---------|---------|---------|--------|---------|------|----------|------|--------|
| ZB2-2-84  | 290  | 82.99   | 2.13    | 0.000518 | 66.65   | 28.95   | 2721.40 | 162.40 | 2559.00 | 0.06 | 0.000068 | 0.56 | 131.92 |
| ZB2-2-85  | 290  | 149.49  | 0.71    | 0.001705 | 19.34   | 30.33   | 2252.44 | 49.66  | 2202.78 | 0.02 | 0.000030 | 0.02 | 132.11 |
| ZB2-2-86  | 285  | 44.23   | 1.32    | 0.000551 | 57.82   | 31.39   | 1523.21 | 250.04 | 1273.17 | 0.20 | 0.045061 | 0.15 | 1.61   |
| ZB2-2-87  | 291  | 22.67   | 1.33    | 0.000426 | 36.63   | 64.13   | 1750.87 | 500.30 | 1250.57 | 0.40 | 0.099168 | 0.29 | 1.55   |
| ZB2-2-88  | 290  | 140.55  | 0.61    | 0.000638 | 16.35   | 95.81   | 1208.13 | 45.24  | 1162.89 | 0.04 | 0.000000 | 0.06 | -      |
| ZB2-2-90  | 293  | 180.84  | 0.90    | 0.000921 | 13.46   | 80.71   | 1509.85 | 74.11  | 1435.74 | 0.05 | 0.000987 | 0.28 | 22.16  |
| ZB2-2-91  | 295  | 65.48   | 1.08    | 0.000623 | 40.83   | 39.29   | 1646.74 | 43.70  | 1603.04 | 0.03 | 0.000166 | 0.17 | 28.26  |
| ZB2-2-92  | 282  | 114.48  | 1.21    | 0.000370 | 62.04   | 43.53   | 935.80  | 26.31  | 909.49  | 0.03 | 0.000000 | 0.18 | -      |
| ZB2-2-93  | 282  | 296.73  | 0.72    | 0.000146 | 46.75   | 146.88  | 694.54  | 19.43  | 675.11  | 0.03 | 0.000000 | 0.32 | -      |
| ZB2-2-94  | 282  | 171.22  | 0.64    | 0.000242 | 21.55   | 191.93  | 806.74  | 20.71  | 786.03  | 0.03 | 0.000000 | 0.35 | -      |
| ZB2-2-95  | 282  | 117.12  | 1.05    | 0.000259 | 51.72   | 74.57   | 1290.80 | 32.33  | 1258.47 | 0.03 | 0.000024 | 0.48 | 84.56  |
| ZB2-2-96  | 290  | 115.81  | 0.79    | 0.000535 | 25.53   | 73.28   | 1089.03 | 41.50  | 1047.53 | 0.04 | 0.000079 | 0.12 | 113.31 |
| ZB2-2-97  | 285  | 96.94   | 1.73    | 0.000565 | 44.57   | 39.71   | 1964.02 | 117.87 | 1846.15 | 0.06 | 0.000010 | 0.53 | 400.13 |
| ZB2-2-98  | 289  | 151.39  | 0.34    | 0.000055 | 51.07   | 353.72  | 639.37  | 7.06   | 632.31  | 0.01 | 0.000000 | 0.20 | -      |
| ZB2-2-100 | 279  | 110.19  | 1.21    | 0.000220 | 51.42   | 88.35   | 717.84  | 58.39  | 659.45  | 0.09 | 0.000000 | 0.54 | -      |
| ZB2-2-101 | 291  | 97.44   | 1.34    | 0.000230 | 56.07   | 77.52   | 1564.56 | 75.95  | 1488.61 | 0.05 | 0.000048 | 0.45 | 134.02 |
| ZB2-2-102 | 2581 | 31.58   | 1.09    | 0.000067 | 97.21   | 153.43  | 435.97  | 33.38  | 402.59  | 0.08 | 0.000101 | 0.36 | 78.52  |
| ZB2-2-103 | 277  | 145.65  | 0.62    | 0.000074 | 41.09   | 328.32  | 663.26  | 8.36   | 654.90  | 0.01 | 0.000026 | 0.82 | 21.56  |
| ZB2-2-104 | 292  | 151.84  | 0.62    | 0.000510 | 21.46   | 91.38   | 968.99  | 28.53  | 940.46  | 0.03 | 0.000158 | 0.18 | 58.38  |
| ZB2-2-105 | 287  | 147.43  | 0.44    | 0.000232 | 11.80   | 364.57  | 716.99  | 13.94  | 703.05  | 0.02 | 0.000000 | 0.18 | -      |
| ZB2-2-106 | 285  | 298.66  | 0.62    | 0.000179 | 29.73   | 188.37  | 885.34  | 20.66  | 864.68  | 0.02 | 0.000000 | 0.25 | -      |
| ZB2-2-107 | 281  | 116.28  | 1.53    | 0.000432 | 43.79   | 52.83   | 1178.84 | 63.16  | 1115.68 | 0.06 | 0.000025 | 0.50 | 268.43 |
| ZB2-2-108 | 290  | 98.47   | 0.97    | 0.000308 | 50.32   | 64.55   | 1004.44 | 23.27  | 981.17  | 0.02 | 0.000000 | 0.19 | -      |
| ZB2-2-109 | 284  | 141.76  | 0.71    | 0.000541 | 18.35   | 100.70  | 1424.87 | 40.21  | 1384.66 | 0.03 | 0.000000 | 0.25 | -      |
| ZB2-2-110 | 288  | 74.32   | 0.83    | 0.000086 | 57.38   | 202.00  | 975.86  | 21.81  | 954.05  | 0.02 | 0.000039 | 0.51 | 25.94  |
| ZB3-1-1   | 309  | 349.118 | 0.48297 | 0.000301 | 41.6    | 79.9679 | 930.48  | 28.55  | 901.93  | 0.03 | 0.000000 | 0.57 | -      |
| ZB3-1-2   | 287  | 31.7756 | 1.66007 | 0.000194 | 223.926 | 23.0137 | 1181.29 | 57.17  | 1124.12 | 0.05 | 0.000155 | 0.35 | 25.46  |
| ZB3-1-3   | 2516 | 68.7728 | 0.71802 | 0.000137 | 16.085  | 453.474 | 227.03  | 14.84  | 212.19  | 0.07 | 0.000000 | 0.17 | -      |
| ZB3-1-4   | 1835 | 28.5802 | 0.26956 | 0.000306 | 18.4971 | 176.406 | 130.24  | 9.32   | 120.92  | 0.08 | 0.000000 | 0.08 | -      |

|          |      |         |         |          |         |         |         |        |         |      |          |      |        |
|----------|------|---------|---------|----------|---------|---------|---------|--------|---------|------|----------|------|--------|
| ZB3-1-5  | 308  | 388.719 | 0.47809 | 0.000306 | 71.4535 | 45.6876 | 743.50  | 29.29  | 714.21  | 0.04 | 0.000000 | 0.54 | -      |
| ZB3-1-6  | 312  | 343.952 | 0.57639 | 0.000416 | 31.4072 | 76.5784 | 855.00  | 32.44  | 822.56  | 0.04 | 0.000000 | 0.62 | -      |
| ZB3-1-7  | 315  | 182.957 | 0.98764 | 0.001045 | 29.719  | 32.2024 | 1371.78 | 96.23  | 1275.55 | 0.08 | 0.000000 | 0.24 | -      |
| ZB3-1-8  | 1826 | 26.8415 | 0.51244 | 0.000150 | 52.7907 | 126.138 | 460.65  | 21.54  | 439.11  | 0.05 | 0.000149 | 0.20 | 20.56  |
| ZB3-1-9  | 311  | 152.473 | 0.68879 | 0.000108 | 56.2222 | 164.427 | 538.05  | 16.31  | 521.74  | 0.03 | 0.000025 | 0.54 | 139.80 |
| ZB3-1-10 | 310  | 410.918 | 0.51627 | 0.000320 | 45.1744 | 69.2407 | 585.72  | 21.75  | 563.97  | 0.04 | 0.000077 | 0.54 | 155.72 |
| ZB3-1-11 | 288  | 145.725 | 0.86558 | 0.000279 | 86.8687 | 41.3178 | 667.50  | 50.96  | 616.54  | 0.08 | 0.000000 | 0.58 | -      |
| ZB3-1-12 | 303  | 236.762 | 1.24694 | 0.000414 | 63.9161 | 37.8191 | 794.68  | 51.57  | 743.11  | 0.07 | 0.000000 | 0.58 | -      |
| ZB3-1-13 | 1865 | 53.4084 | 0.41928 | 0.000155 | 66.0733 | 97.7813 | 460.22  | 17.37  | 442.85  | 0.04 | 0.000000 | 0.36 | -      |
| ZB3-1-14 | 1849 | 4.31922 | 0.74729 | 0.000097 | 237.652 | 43.226  | 142.72  | 14.59  | 128.13  | 0.11 | 0.002093 | 0.02 | 11.88  |
| ZB3-1-15 | 1827 | 43.0259 | 0.70637 | 0.000126 | 83.4426 | 95.0884 | 590.56  | 16.28  | 574.28  | 0.03 | 0.000017 | 0.13 | 66.38  |
| ZB3-1-16 | 1856 | 50.9468 | 0.07696 | 0.000072 | 62.9592 | 220.097 | 451.07  | 5.04   | 446.03  | 0.01 | 0.000008 | 0.03 | 34.89  |
| ZB3-1-17 | 306  | 457.32  | 0.5154  | 0.000467 | 41.0095 | 52.2062 | 899.62  | 31.33  | 868.29  | 0.04 | 0.000087 | 0.44 | 131.33 |
| ZB3-1-18 | 1870 | 33.0467 | 0.11825 | 0.000083 | 84.8515 | 141.424 | 1467.16 | 50.48  | 1416.68 | 0.04 | 0.000963 | 0.36 | 1.54   |
| ZB3-1-19 | 1840 | 3.95098 | 0.74586 | 0.000098 | 249.504 | 40.9738 | 109.34  | 12.98  | 96.36   | 0.13 | 0.000026 | 0.02 | 114.30 |
| ZB3-1-20 | 306  | 631.97  | 0.73328 | 0.000120 | 79.0083 | 105.544 | 470.79  | 18.19  | 452.60  | 0.04 | 0.000000 | 0.69 | -      |
| ZB3-1-21 | 311  | 305.866 | 1.11562 | 0.000620 | 43.35   | 37.2165 | 1210.46 | 59.82  | 1150.64 | 0.05 | 0.000000 | 0.55 | -      |
| ZB3-1-22 | 2532 | 119.71  | 0.51004 | 0.000140 | 49.7059 | 143.905 | 336.11  | 24.60  | 311.51  | 0.08 | 0.000000 | 0.23 | -      |
| ZB3-1-23 | 2521 | 112.731 | 1.12609 | 0.000220 | 74.17   | 61.2991 | 508.35  | 30.14  | 478.21  | 0.06 | 0.000000 | 0.25 | -      |
| ZB3-1-24 | 374  | 174.394 | 0.82565 | 0.000141 | 81.9178 | 86.7057 | 351.54  | 20.28  | 331.26  | 0.06 | 0.000000 | 0.37 | -      |
| ZB3-1-25 | 1855 | 4.991   | 0.30252 | 0.000070 | 94.1489 | 152.429 | 154.88  | 11.13  | 143.75  | 0.08 | 0.000000 | 0.03 | -      |
| ZB3-1-26 | 1899 | 218.356 | 0.13728 | 0.000142 | 47.381  | 148.116 | 962.22  | 5.06   | 957.16  | 0.01 | 0.000000 | 0.03 | -      |
| ZB3-1-27 | 314  | 89.3828 | 1.74775 | 0.000186 | 122.403 | 43.8196 | 679.67  | 72.69  | 606.98  | 0.12 | 0.000005 | 0.64 | 990.65 |
| ZB3-1-28 | 295  | 43.4515 | 1.06162 | 0.000623 | 49.6414 | 32.3417 | 1245.36 | 132.05 | 1113.31 | 0.12 | 0.000042 | 0.70 | 218.67 |
| ZB3-1-29 | 292  | 176.44  | 0.67172 | 0.000411 | 47.5055 | 51.1746 | 800.39  | 57.19  | 743.20  | 0.08 | 0.000000 | 0.55 | -      |
| ZB3-1-30 | 2498 | 96.2248 | 1.11132 | 0.000119 | 66.0156 | 127.101 | 468.27  | 28.14  | 440.13  | 0.06 | 0.000000 | 0.13 | -      |
| ZB3-1-31 | 321  | 50.218  | 1.48899 | 0.000132 | 119.469 | 63.4815 | 1000.91 | 65.70  | 935.21  | 0.07 | 0.000031 | 0.55 | 154.91 |
| ZB3-1-32 | 1864 | 3.71145 | 0.34172 | 0.000110 | 81.1409 | 112.159 | 179.17  | 18.03  | 161.14  | 0.11 | 0.000000 | 0.03 | -      |
| ZB3-1-33 | 2528 | 57.4252 | 0.68572 | 0.000172 | 133.333 | 43.5317 | 377.38  | 35.92  | 341.46  | 0.11 | 0.000000 | 0.27 | -      |
| ZB3-1-34 | 1870 | 27.0361 | 1.12911 | 0.000128 | 247.273 | 31.6176 | 706.94  | 52.02  | 654.92  | 0.08 | 0.000082 | 0.47 | 75.36  |

|          |      |         |         |          |         |         |         |       |         |      |          |      |        |
|----------|------|---------|---------|----------|---------|---------|---------|-------|---------|------|----------|------|--------|
| ZB3-1-35 | 2503 | 28.1102 | 0.96604 | 0.000148 | 92.1168 | 73.1379 | 252.03  | 35.34 | 216.69  | 0.16 | 0.000000 | 0.44 | -      |
| ZB3-1-36 | 313  | 295.957 | 1.0006  | 0.000318 | 100.92  | 31.2073 | 898.62  | 37.10 | 861.52  | 0.04 | 0.000000 | 0.77 | -      |
| ZB3-1-37 | 305  | 222.189 | 0.76436 | 0.000229 | 56.0435 | 78.045  | 586.58  | 31.83 | 554.75  | 0.06 | 0.000000 | 0.59 | -      |
| ZB3-1-38 | 323  | 863.914 | 0.40049 | 0.000115 | 75.7447 | 115.075 | 417.49  | 15.78 | 401.71  | 0.04 | 0.000000 | 0.78 | -      |
| ZB3-1-39 | 1859 | 35.8503 | 0.53227 | 0.000122 | 68.5714 | 119.643 | 206.99  | 6.58  | 200.41  | 0.03 | 0.000000 | 0.06 | -      |
| ZB3-1-40 | 1856 | 137.683 | 0.20959 | 0.000068 | 92.8916 | 159.403 | 1224.20 | 6.99  | 1217.21 | 0.01 | 0.000000 | 0.01 | -      |
| ZB3-1-41 | 1818 | 34.1849 | 0.48117 | 0.000147 | 54.4785 | 124.55  | 475.85  | 18.89 | 456.96  | 0.04 | 0.000079 | 0.05 | 42.30  |
| ZB3-1-42 | 1896 | 3.62869 | 0.13083 | 0.000040 | 97.8641 | 256.151 | 145.88  | 8.24  | 137.64  | 0.06 | 0.000000 | 0.02 | -      |
| ZB3-1-43 | 2535 | 89.891  | 0.61179 | 0.000140 | 81.1561 | 87.963  | 348.15  | 33.87 | 314.28  | 0.11 | 0.000000 | 0.37 | -      |
| ZB3-1-44 | 2008 | 21.4665 | 0.3987  | 0.000096 | 209.474 | 49.665  | 329.28  | 32.10 | 297.18  | 0.11 | 0.000119 | 0.50 | 50.56  |
| ZB3-1-45 | 314  | 224.086 | 1.05047 | 0.000439 | 44.5047 | 51.1394 | 1105.46 | 52.59 | 1052.87 | 0.05 | 0.000005 | 0.62 | 658.61 |
| ZB3-1-46 | 2530 | 73.2603 | 0.50092 | 0.000223 | 32.4    | 138.58  | 571.27  | 21.38 | 549.89  | 0.04 | 0.000000 | 0.26 | -      |
| ZB3-1-47 | 2502 | 133.159 | 0.51995 | 0.000069 | 94.75   | 151.979 | 160.35  | 21.73 | 138.62  | 0.16 | 0.000000 | 0.55 | -      |
| ZB3-1-48 | 1997 | 29.135  | 0.48716 | 0.000108 | 130.839 | 70.604  | 495.57  | 15.84 | 479.73  | 0.03 | 0.000143 | 0.12 | 15.75  |
| ZB3-1-49 | 303  | 642.141 | 1.03612 | 0.000274 | 117.668 | 31.0511 | 916.09  | 43.24 | 872.85  | 0.05 | 0.000000 | 0.72 | -      |
| ZB3-1-50 | 310  | 75.2273 | 1.05013 | 0.000818 | 52.0156 | 23.5    | 2333.52 | 97.92 | 2235.60 | 0.04 | 0.000009 | 0.51 | 334.48 |
| ZB3-1-51 | 2515 | 168.246 | 0.53905 | 0.000140 | 37.8857 | 188.989 | 422.39  | 29.16 | 393.23  | 0.07 | 0.000000 | 0.25 | -      |
| ZB3-1-52 | 2255 | 141.932 | 0.44006 | 0.000245 | 23.4926 | 173.552 | 442.83  | 16.20 | 426.63  | 0.04 | 0.000000 | 0.06 | -      |
| ZB3-1-53 | 378  | 173.846 | 0.67119 | 0.000112 | 76.8868 | 116.442 | 426.71  | 18.04 | 408.67  | 0.04 | 0.000000 | 0.35 | -      |
| ZB3-1-54 | 378  | 158.805 | 0.66795 | 0.000252 | 40.8824 | 97.1223 | 620.85  | 31.87 | 588.98  | 0.05 | 0.000000 | 0.33 | -      |
| ZB3-1-55 | 1850 | 229.79  | 0.16574 | 0.000105 | 48.0142 | 197.784 | 1404.14 | 5.40  | 1398.74 | 0.00 | 0.000000 | 0.00 | -      |
| ZB3-1-57 | 1857 | 67.7241 | 0.15519 | 0.000080 | 78.5047 | 158.929 | 604.87  | 7.51  | 597.36  | 0.01 | 0.000023 | 0.05 | 25.50  |
| ZB3-1-58 | 1848 | 7.45908 | 0.26746 | 0.000296 | 37.6722 | 89.7226 | 269.65  | 15.90 | 253.75  | 0.06 | 0.000000 | 0.02 | -      |
| ZB3-1-59 | 1862 | 3.70913 | 0.70843 | 0.000071 | 320.43  | 44.0604 | 134.96  | 16.76 | 118.20  | 0.14 | 0.000179 | 0.04 | 47.88  |
| ZB3-1-60 | 307  | 376.863 | 0.54016 | 0.000210 | 53.9583 | 88.1081 | 619.67  | 22.24 | 597.43  | 0.04 | 0.000000 | 0.59 | -      |
| ZB3-1-61 | 1879 | 96.4703 | 0.27571 | 0.000103 | 49.7458 | 194.378 | 511.87  | 7.65  | 504.22  | 0.02 | 0.000138 | 0.15 | 7.91   |
| ZB3-1-62 | 1848 | 62.0616 | 0.46096 | 0.000090 | 124.343 | 89.7644 | 1014.69 | 14.37 | 1000.32 | 0.01 | 0.000000 | 0.04 | -      |
| ZB3-1-63 | 1878 | 149.112 | 0.07832 | 0.000066 | 51.9048 | 291.972 | 987.75  | 4.89  | 982.86  | 0.00 | 0.000000 | 0.00 | -      |
| ZB3-1-64 | 2491 | 95.8816 | 2.77869 | 0.000276 | 69.106  | 52.4677 | 483.64  | 46.78 | 436.86  | 0.11 | 0.000000 | 0.37 | -      |
| ZB3-1-65 | 305  | 89.2569 | 0.99385 | 0.000232 | 116.942 | 36.8198 | 1155.50 | 65.18 | 1090.32 | 0.06 | 0.000025 | 0.56 | 186.75 |

|          |      |         |         |          |         |         |         |        |         |      |          |      |        |
|----------|------|---------|---------|----------|---------|---------|---------|--------|---------|------|----------|------|--------|
| ZB3-1-66 | 2484 | 93.7334 | 0.77198 | 0.000113 | 184.559 | 48.0876 | 331.20  | 37.88  | 293.32  | 0.13 | 0.000456 | 0.51 | 70.41  |
| ZB3-1-67 | 2594 | 85.0181 | 0.41434 | 0.000105 | 61.7757 | 154.614 | 516.87  | 18.29  | 498.58  | 0.04 | 0.000011 | 0.48 | 166.95 |
| ZB3-1-68 | 2521 | 108.129 | 0.48484 | 0.000044 | 73.0612 | 310.056 | 116.64  | 17.93  | 98.71   | 0.18 | 0.000000 | 0.42 | -      |
| ZB3-1-69 | 292  | 75.3392 | 0.80222 | 0.000102 | 90.2174 | 108.554 | 481.55  | 31.40  | 450.15  | 0.07 | 0.000017 | 0.56 | 270.47 |
| ZB3-1-70 | 1859 | 71.9654 | 0.41682 | 0.000226 | 23.5    | 187.943 | 465.94  | 13.50  | 452.44  | 0.03 | 0.000000 | 0.07 | -      |
| ZB3-1-71 | 1856 | 35.7414 | 0.64685 | 0.000364 | 31.7085 | 86.5293 | 575.41  | 21.86  | 553.55  | 0.04 | 0.000002 | 0.05 | 247.39 |
| ZB3-1-72 | 2585 | 84.1076 | 0.71793 | 0.000143 | 82.4096 | 84.9415 | 445.92  | 50.11  | 395.81  | 0.13 | 0.000000 | 0.40 | -      |
| ZB3-1-73 | 1840 | 14.6982 | 0.19295 | 0.000065 | 63.0488 | 245.648 | 211.23  | 8.58   | 202.65  | 0.04 | 0.000227 | 0.06 | 7.79   |
| ZB3-1-74 | 306  | 543.368 | 0.77831 | 0.000214 | 62.8509 | 74.4592 | 662.00  | 29.19  | 632.81  | 0.05 | 0.000000 | 0.52 | -      |
| ZB3-1-75 | 1847 | 35.1226 | 0.10605 | 0.000081 | 52.551  | 233.981 | 305.40  | 6.37   | 299.03  | 0.02 | 0.000000 | 0.02 | -      |
| ZB3-1-76 | 314  | 291.988 | 0.84735 | 0.000699 | 28.7744 | 49.7508 | 1138.71 | 48.38  | 1090.33 | 0.04 | 0.000000 | 0.53 | -      |
| ZB3-1-77 | 1891 | 171.198 | 0.34027 | 0.000282 | 45.1685 | 78.4826 | 643.60  | 6.37   | 637.23  | 0.01 | 0.000002 | 0.04 | 188.04 |
| ZB3-1-78 | 372  | 168.159 | 0.77191 | 0.000312 | 48.6631 | 65.8242 | 427.21  | 32.58  | 394.63  | 0.08 | 0.000000 | 0.32 | -      |
| ZB3-1-79 | 378  | 168.416 | 1.05852 | 0.000358 | 91.5068 | 30.509  | 692.57  | 40.34  | 652.23  | 0.06 | 0.000000 | 0.33 | -      |
| ZB3-1-80 | 1883 | 8.59621 | 0.17326 | 0.000059 | 59.8611 | 283.991 | 169.51  | 6.65   | 162.86  | 0.04 | 0.000016 | 0.01 | 50.10  |
| ZB3-1-81 | 2521 | 120.196 | 0.82344 | 0.000131 | 94.7368 | 80.8333 | 502.96  | 29.64  | 473.32  | 0.06 | 0.000000 | 0.32 | -      |
| ZB3-1-82 | 313  | 360.213 | 1.03206 | 0.000262 | 82.2179 | 46.4269 | 746.41  | 41.35  | 705.06  | 0.06 | 0.000087 | 0.63 | 209.27 |
| ZB3-1-83 | 1853 | 49.8606 | 0.4437  | 0.000075 | 92.4784 | 145.067 | 743.49  | 11.45  | 732.04  | 0.02 | 0.000004 | 0.03 | 26.47  |
| ZB3-1-84 | 2526 | 40.4413 | 0.8855  | 0.000112 | 125.042 | 71.5054 | 497.67  | 34.52  | 463.15  | 0.07 | 0.000041 | 0.33 | 123.14 |
| ZB3-1-85 | 1839 | 22.787  | 0.73736 | 0.000126 | 119.194 | 66.4411 | 803.25  | 33.07  | 770.18  | 0.04 | 0.000072 | 0.13 | 22.55  |
| ZB3-1-87 | 1893 | 91.3889 | 0.16261 | 0.000078 | 104.216 | 122.954 | 1078.32 | 8.39   | 1069.93 | 0.01 | 0.000008 | 0.02 | 18.88  |
| ZB3-1-88 | 1825 | 77.4163 | 0.2984  | 0.000118 | 86.4286 | 98.1635 | 235.61  | 8.87   | 226.74  | 0.04 | 0.000000 | 0.06 | -      |
| ZB3-1-89 | 1850 | 177.6   | 0.1092  | 0.000179 | 24.3636 | 229.478 | 499.37  | 8.47   | 490.90  | 0.02 | 0.000004 | 0.10 | 232.95 |
| ZB3-1-90 | 2601 | 44.0534 | 0.82487 | 0.000065 | 105.471 | 145.245 | 217.41  | 28.37  | 189.04  | 0.15 | 0.000000 | 0.34 | -      |
| ZB3-1-91 | 303  | 114.449 | 1.60785 | 0.000911 | 55.4348 | 19.8039 | 1388.35 | 137.88 | 1250.47 | 0.11 | 0.000000 | 0.33 | -      |
| ZB3-1-92 | 309  | 163.868 | 0.82549 | 0.000330 | 75.7225 | 39.9618 | 1091.75 | 46.70  | 1045.05 | 0.04 | 0.000000 | 0.49 | -      |
| ZB3-1-93 | 2522 | 143.65  | 0.25166 | 0.000106 | 76.7391 | 123.135 | 205.18  | 14.92  | 190.26  | 0.08 | 0.000000 | 0.26 | -      |
| ZB3-1-94 | 290  | 108.905 | 0.70964 | 0.000192 | 85.3234 | 60.9913 | 531.18  | 37.49  | 493.69  | 0.08 | 0.000004 | 0.63 | 650.86 |
| ZB3-1-95 | 1867 | 141.612 | 0.09043 | 0.000068 | 49.3976 | 299.512 | 795.79  | 4.22   | 791.57  | 0.01 | 0.000000 | 0.01 | -      |
| ZB3-1-96 | 1809 | 39.6235 | 1.54735 | 0.000747 | 14.6875 | 91.1462 | 637.59  | 42.89  | 594.70  | 0.07 | 0.000000 | 0.04 | -      |

|           |      |         |         |          |         |         |         |       |         |      |          |      |        |
|-----------|------|---------|---------|----------|---------|---------|---------|-------|---------|------|----------|------|--------|
| ZB3-1-97  | 369  | 124.129 | 1.04693 | 0.000323 | 105.505 | 29.3623 | 694.75  | 42.39 | 652.36  | 0.06 | 0.000007 | 0.26 | 459.55 |
| ZB3-1-98  | 1883 | 53.9575 | 0.39996 | 0.000135 | 70      | 105.976 | 717.09  | 15.64 | 701.45  | 0.02 | 0.000159 | 0.14 | 7.98   |
| ZB3-1-99  | 2497 | 148.537 | 1.01361 | 0.000141 | 92.3952 | 76.7336 | 477.70  | 27.43 | 450.27  | 0.06 | 0.000008 | 0.19 | 575.39 |
| ZB3-1-100 | 385  | 77.8964 | 1.06487 | 0.000102 | 147.474 | 66.3098 | 662.62  | 22.13 | 640.49  | 0.03 | 0.000000 | 0.31 | -      |
| ZB3-1-101 | 2507 | 115.522 | 0.58794 | 0.000076 | 21.3718 | 616.677 | 334.93  | 13.37 | 321.56  | 0.04 | 0.000000 | 0.27 | -      |
| ZB3-1-102 | 2643 | 14.634  | 0.30387 | 0.000088 | 71.2    | 160.112 | 322.83  | 32.89 | 289.94  | 0.11 | 0.000067 | 0.70 | 55.44  |
| ZB3-1-103 | 1873 | 22.0367 | 0.02546 | 0.000045 | 21.5517 | 1039.2  | 139.46  | 2.22  | 137.24  | 0.02 | 0.000000 | 0.02 | -      |
| ZB3-1-104 | 1843 | 110.317 | 0.23768 | 0.000086 | 83.1683 | 140.357 | 1412.91 | 10.55 | 1402.36 | 0.01 | 0.000000 | 0.02 | -      |
| ZB3-1-105 | 374  | 960.494 | 0.48466 | 0.000671 | 23.675  | 62.9561 | 1410.63 | 71.90 | 1338.73 | 0.05 | 0.000010 | 0.61 | 839.50 |
| ZB3-1-106 | 1848 | 3.7605  | 0.6945  | 0.000175 | 48.8596 | 116.786 | 321.87  | 27.09 | 294.78  | 0.09 | 0.000024 | 0.03 | 97.93  |
| ZB3-1-107 | 371  | 561.703 | 0.27859 | 0.000101 | 100.394 | 98.9804 | 273.67  | 17.67 | 256.00  | 0.07 | 0.000299 | 0.55 | 89.74  |
| ZB3-1-108 | 1967 | 129.556 | 0.27263 | 0.000151 | 29.9383 | 221.031 | 307.82  | 7.42  | 300.40  | 0.02 | 0.000000 | 0.08 | -      |
| ZB3-1-110 | 1867 | 108.26  | 0.07541 | 0.000058 | 47.2    | 363.559 | 681.74  | 4.47  | 677.27  | 0.01 | 0.000074 | 0.01 | 4.39   |
| ZB3-3-1   | 291  | 137.97  | 1.33    | 0.000358 | 36.77   | 76.03   | 1269.97 | 43.69 | 1226.28 | 0.04 | 0.000021 | 0.48 | 180.90 |
| ZB3-3-2   | 301  | 368.01  | 0.97    | 0.000624 | 31.25   | 51.30   | 1147.71 | 58.35 | 1089.36 | 0.05 | 0.000000 | 0.60 | -      |
| ZB3-3-3   | 170  | 281.62  | 0.59    | 0.000533 | 102.71  | 18.26   | 810.79  | 40.49 | 770.30  | 0.05 | 0.000171 | 0.73 | 120.48 |
| ZB3-3-4   | 294  | 113.03  | 1.17    | 0.000106 | 86.70   | 108.77  | 729.83  | 27.17 | 702.66  | 0.04 | 0.000000 | 0.48 | -      |
| ZB3-3-5   | 1868 | 106.56  | 0.30    | 0.000082 | 91.55   | 133.90  | 1529.14 | 11.16 | 1517.98 | 0.01 | 0.000001 | 0.02 | 40.78  |
| ZB3-3-6   | 287  | 231.88  | 0.40    | 0.000278 | 37.13   | 96.76   | 789.21  | 12.60 | 776.61  | 0.02 | 0.000000 | 0.07 | -      |
| ZB3-3-7   | 1859 | 119.39  | 0.26    | 0.000086 | 80.87   | 143.94  | 922.93  | 7.29  | 915.64  | 0.01 | 0.000000 | 0.01 | -      |
| ZB3-3-8   | 284  | 151.28  | 0.58    | 0.000204 | 34.20   | 143.48  | 612.01  | 13.79 | 598.22  | 0.02 | 0.000000 | 0.14 | -      |
| ZB3-3-9   | 282  | 228.62  | 0.66    | 0.000193 | 36.38   | 142.66  | 814.60  | 16.03 | 798.57  | 0.02 | 0.000000 | 0.48 | -      |
| ZB3-3-10  | 301  | 200.16  | 1.46    | 0.000494 | 72.70   | 27.85   | 921.47  | 61.66 | 859.81  | 0.07 | 0.000000 | 0.54 | -      |
| ZB3-3-11  | 1877 | 121.10  | 0.27    | 0.000061 | 78.05   | 210.48  | 701.32  | 6.04  | 695.28  | 0.01 | 0.000016 | 0.02 | 21.89  |
| ZB3-3-12  | 290  | 119.30  | 0.90    | 0.000163 | 82.57   | 74.50   | 694.57  | 26.35 | 668.22  | 0.04 | 0.000007 | 0.35 | 347.29 |
| ZB3-3-13  | 287  | 76.59   | 1.58    | 0.000903 | 77.16   | 14.35   | 1783.54 | 63.11 | 1720.43 | 0.04 | 0.000023 | 0.20 | 162.99 |
| ZB3-3-14  | 285  | 99.46   | 1.77    | 0.000803 | 93.17   | 13.37   | 1865.68 | 68.96 | 1796.72 | 0.04 | 0.000000 | 0.39 | -      |
| ZB3-3-15  | 290  | 162.71  | 0.69    | 0.000185 | 33.26   | 162.33  | 919.82  | 21.12 | 898.70  | 0.02 | 0.000056 | 0.26 | 68.48  |
| ZB3-3-16  | 287  | 181.37  | 1.17    | 0.000322 | 61.68   | 50.36   | 846.35  | 52.98 | 793.37  | 0.07 | 0.000091 | 0.38 | 123.74 |



|          |      |        |      |          |        |        |         |        |         |      |          |      |        |
|----------|------|--------|------|----------|--------|--------|---------|--------|---------|------|----------|------|--------|
| ZB3-3-17 | 294  | 193.95 | 0.63 | 0.000421 | 22.10  | 107.52 | 862.48  | 25.51  | 836.97  | 0.03 | 0.000178 | 0.07 | 54.43  |
| ZB3-3-18 | 294  | 307.40 | 0.44 | 0.000216 | 76.37  | 60.72  | 914.39  | 13.14  | 901.25  | 0.01 | 0.000075 | 0.15 | 51.80  |
| ZB3-3-19 | 288  | 170.25 | 0.68 | 0.000406 | 28.81  | 85.52  | 1215.82 | 25.96  | 1189.86 | 0.02 | 0.000004 | 0.29 | 308.34 |
| ZB3-3-20 | 283  | 131.92 | 0.81 | 0.000108 | 48.72  | 190.39 | 459.25  | 17.12  | 442.13  | 0.04 | 0.000000 | 0.34 | -      |
| ZB3-3-21 | 1846 | 69.41  | 0.49 | 0.000247 | 27.95  | 144.82 | 531.07  | 13.79  | 517.28  | 0.03 | 0.000000 | 0.04 | -      |
| ZB3-3-22 | 287  | 195.28 | 0.63 | 0.000377 | 26.71  | 99.19  | 1233.15 | 25.83  | 1207.32 | 0.02 | 0.000429 | 0.36 | 18.26  |
| ZB3-3-23 | 289  | 146.17 | 0.49 | 0.000183 | 38.47  | 142.29 | 808.36  | 11.36  | 797.00  | 0.01 | 0.000000 | 0.30 | -      |
| ZB3-3-24 | 291  | 68.54  | 1.22 | 0.000351 | 82.93  | 34.38  | 1835.29 | 42.28  | 1793.01 | 0.02 | 0.000675 | 0.35 | 6.50   |
| ZB3-3-25 | 1851 | 13.12  | 1.05 | 0.000367 | 79.71  | 34.20  | 257.84  | 27.59  | 230.25  | 0.12 | 0.000000 | 0.03 | -      |
| ZB3-3-26 | 282  | 93.79  | 0.86 | 0.000459 | 32.85  | 66.33  | 1599.85 | 29.69  | 1570.16 | 0.02 | 0.000020 | 0.26 | 56.85  |
| ZB3-3-27 | 291  | 204.01 | 0.95 | 0.000213 | 52.44  | 89.53  | 698.22  | 36.38  | 661.84  | 0.05 | 0.000000 | 0.39 | -      |
| ZB3-3-28 | 289  | 41.54  | 1.11 | 0.002869 | 25.00  | 13.94  | 4489.77 | 198.77 | 4291.00 | 0.05 | 0.000044 | 0.07 | 104.73 |
| ZB3-3-29 | 294  | 143.97 | 1.09 | 0.000222 | 48.29  | 93.14  | 1048.18 | 35.60  | 1012.58 | 0.04 | 0.000560 | 0.59 | 21.90  |
| ZB3-3-30 | 2516 | 157.08 | 0.58 | 0.000119 | 137.19 | 61.12  | 276.00  | 34.37  | 241.63  | 0.14 | 0.000000 | 0.60 | -      |
| ZB3-3-31 | 292  | 184.16 | 0.68 | 0.000126 | 37.83  | 210.22 | 584.78  | 15.30  | 569.48  | 0.03 | 0.000000 | 0.31 | -      |
| ZB3-3-32 | 289  | 108.19 | 0.69 | 0.000111 | 259.91 | 34.74  | 1656.18 | 25.14  | 1631.04 | 0.02 | 0.000013 | 0.28 | 49.18  |
| ZB3-3-33 | 280  | 56.27  | 1.90 | 0.001001 | 101.33 | 9.85   | 2336.63 | 81.93  | 2254.70 | 0.04 | 0.000023 | 0.20 | 124.76 |
| ZB3-3-34 | 288  | 147.88 | 0.71 | 0.000194 | 28.63  | 179.64 | 576.85  | 17.70  | 559.15  | 0.03 | 0.000000 | 0.24 | -      |
| ZB3-3-35 | 290  | 372.19 | 0.41 | 0.000597 | 27.62  | 60.63  | 2035.94 | 19.42  | 2016.52 | 0.01 | 0.000000 | 0.09 | -      |
| ZB3-3-36 | 291  | 74.17  | 1.69 | 0.000647 | 98.26  | 15.73  | 1537.98 | 52.14  | 1485.84 | 0.04 | 0.000005 | 0.21 | 278.41 |
| ZB3-3-37 | 320  | 292.92 | 0.82 | 0.000762 | 46.94  | 27.95  | 1223.86 | 57.92  | 1165.94 | 0.05 | 0.000000 | 0.57 | -      |
| ZB3-3-38 | 1850 | 164.27 | 0.22 | 0.000090 | 64.07  | 172.83 | 1599.21 | 7.97   | 1591.24 | 0.01 | 0.000000 | 0.02 | -      |
| ZB3-3-39 | 293  | 200.63 | 0.48 | 0.000193 | 45.51  | 113.95 | 898.22  | 11.70  | 886.52  | 0.01 | 0.000000 | 0.12 | -      |
| ZB3-3-40 | 291  | 121.29 | 0.71 | 0.000165 | 76.63  | 79.25  | 848.23  | 22.72  | 825.51  | 0.03 | 0.000067 | 0.22 | 72.73  |
| ZB3-3-41 | 314  | 273.50 | 0.88 | 0.000817 | 30.79  | 39.78  | 1326.75 | 49.46  | 1277.29 | 0.04 | 0.000000 | 0.60 | -      |
| ZB3-3-42 | 289  | 199.30 | 0.85 | 0.000262 | 103.86 | 36.69  | 1541.90 | 22.70  | 1519.20 | 0.01 | 0.000000 | 0.33 | -      |
| ZB3-3-43 | 288  | 187.68 | 0.59 | 0.000847 | 16.76  | 70.43  | 1301.17 | 27.43  | 1273.74 | 0.02 | 0.000000 | 0.12 | -      |
| ZB3-3-44 | 313  | 149.10 | 0.98 | 0.000261 | 69.46  | 55.20  | 1017.20 | 41.45  | 975.75  | 0.04 | 0.000055 | 0.55 | 92.75  |
| ZB3-3-45 | 290  | 58.37  | 1.81 | 0.000484 | 99.28  | 20.83  | 2954.39 | 143.59 | 2810.80 | 0.05 | 0.000067 | 0.39 | 81.21  |
| ZB3-3-47 | 2157 | 53.30  | 0.76 | 0.000296 | 58.64  | 57.54  | 592.29  | 30.12  | 562.17  | 0.05 | 0.000062 | 0.28 | 102.58 |

|          |      |        |      |          |        |        |         |       |         |      |          |      |         |
|----------|------|--------|------|----------|--------|--------|---------|-------|---------|------|----------|------|---------|
| ZB3-3-48 | 301  | 154.37 | 0.76 | 0.000261 | 40.13  | 95.57  | 872.44  | 20.24 | 852.20  | 0.02 | 0.000004 | 0.27 | 304.07  |
| ZB3-3-49 | 1830 | 102.12 | 0.07 | 0.000076 | 43.54  | 302.85 | 485.20  | 3.75  | 481.45  | 0.01 | 0.000000 | 0.01 | -       |
| ZB3-3-50 | 292  | 145.52 | 0.60 | 0.000089 | 202.22 | 55.59  | 725.96  | 21.58 | 704.38  | 0.03 | 0.001228 | 0.25 | 10.92   |
| ZB3-3-51 | 1880 | 110.32 | 0.03 | 0.000040 | 44.14  | 572.56 | 642.90  | 3.70  | 639.20  | 0.01 | 0.000000 | 0.00 | -       |
| ZB3-3-52 | 1923 | 64.46  | 0.43 | 0.000191 | 43.22  | 121.31 | 358.60  | 17.07 | 341.53  | 0.05 | 0.000000 | 0.19 | -       |
| ZB3-3-53 | 1854 | 167.02 | 0.21 | 0.000092 | 55.23  | 196.51 | 693.80  | 5.30  | 688.50  | 0.01 | 0.000000 | 0.02 | -       |
| ZB3-3-54 | 289  | 135.69 | 0.44 | 0.000073 | 54.46  | 251.61 | 470.58  | 8.85  | 461.73  | 0.02 | 0.000000 | 0.23 | -       |
| ZB3-3-55 | 287  | 81.89  | 1.23 | 0.000208 | 74.47  | 64.55  | 1395.49 | 50.19 | 1345.30 | 0.04 | 0.000181 | 0.43 | 38.66   |
| ZB3-3-56 | 298  | 153.57 | 0.79 | 0.000206 | 92.37  | 52.50  | 499.79  | 39.74 | 460.05  | 0.09 | 0.000253 | 0.68 | 96.61   |
| ZB3-3-58 | 286  | 138.98 | 0.55 | 0.000393 | 24.34  | 104.45 | 928.09  | 16.27 | 911.82  | 0.02 | 0.000000 | 0.10 | -       |
| ZB3-3-59 | 304  | 190.85 | 0.46 | 0.000057 | 106.54 | 165.61 | 322.76  | 5.44  | 317.32  | 0.02 | 0.000000 | 0.26 | -       |
| ZB3-3-60 | 2171 | 83.54  | 0.51 | 0.000186 | 75.85  | 70.80  | 687.33  | 22.56 | 664.77  | 0.03 | 0.000000 | 0.07 | -       |
| ZB3-3-61 | 310  | 250.77 | 0.64 | 0.000221 | 40.67  | 111.48 | 546.49  | 27.63 | 518.86  | 0.05 | 0.000058 | 0.52 | 195.10  |
| ZB3-3-62 | 294  | 134.44 | 0.62 | 0.000116 | 223.31 | 38.69  | 966.95  | 23.08 | 943.87  | 0.02 | 0.000004 | 0.21 | 260.25  |
| ZB3-3-63 | 288  | 95.87  | 0.66 | 0.000297 | 32.25  | 104.41 | 1487.35 | 29.84 | 1457.51 | 0.02 | 0.000001 | 0.13 | 416.79  |
| ZB3-3-64 | 301  | 34.20  | 1.25 | 0.000115 | 100.92 | 86.45  | 444.04  | 43.17 | 400.87  | 0.11 | 0.000151 | 0.68 | 83.58   |
| ZB3-3-65 | 292  | 171.83 | 0.69 | 0.000171 | 28.71  | 204.27 | 641.87  | 16.83 | 625.04  | 0.03 | 0.000000 | 0.29 | -       |
| ZB3-3-66 | 288  | 190.98 | 0.56 | 0.000062 | 205.15 | 78.28  | 526.36  | 11.76 | 514.60  | 0.02 | 0.000000 | 0.47 | -       |
| ZB3-3-67 | 297  | 85.75  | 0.65 | 0.000145 | 148.70 | 46.25  | 1250.70 | 23.36 | 1227.34 | 0.02 | 0.000000 | 0.22 | -       |
| ZB3-3-68 | 311  | 173.69 | 0.65 | 0.000435 | 28.17  | 81.60  | 689.64  | 37.62 | 652.02  | 0.06 | 0.000000 | 0.48 | -       |
| ZB3-3-69 | 308  | 270.61 | 0.91 | 0.000246 | 46.60  | 87.23  | 792.33  | 34.25 | 758.08  | 0.05 | 0.000001 | 0.69 | 1158.21 |
| ZB3-3-70 | 290  | 314.52 | 0.44 | 0.000187 | 78.87  | 67.91  | 635.57  | 15.67 | 619.90  | 0.03 | 0.000000 | 0.39 | -       |
| ZB3-3-71 | 283  | 216.05 | 0.41 | 0.000043 | 65.62  | 356.33 | 272.13  | 4.81  | 267.32  | 0.02 | 0.000000 | 0.64 | -       |
| ZB3-3-72 | 313  | 320.43 | 0.60 | 0.000833 | 27.42  | 43.76  | 1411.92 | 63.38 | 1348.54 | 0.05 | 0.000000 | 0.58 | -       |
| ZB3-3-73 | 288  | 126.72 | 0.90 | 0.000626 | 30.37  | 52.62  | 1901.76 | 49.77 | 1851.99 | 0.03 | 0.000055 | 0.39 | 76.22   |
| ZB3-3-74 | 1890 | 52.77  | 0.48 | 0.000143 | 196.32 | 35.59  | 1671.72 | 25.74 | 1645.98 | 0.02 | 0.000060 | 0.01 | 8.21    |
| ZB3-3-75 | 316  | 117.19 | 0.87 | 0.000742 | 55.25  | 24.38  | 880.82  | 63.29 | 817.53  | 0.08 | 0.000308 | 0.55 | 42.51   |
| ZB3-3-76 | 290  | 74.26  | 0.72 | 0.000426 | 31.72  | 73.91  | 1363.46 | 86.75 | 1276.71 | 0.07 | 0.009377 | 0.12 | 2.75    |
| ZB3-3-78 | 319  | 54.15  | 1.99 | 0.000425 | 106.15 | 22.18  | 770.95  | 99.59 | 671.36  | 0.15 | 0.000176 | 0.43 | 151.62  |
| ZB3-3-79 | 293  | 172.10 | 0.55 | 0.000121 | 32.61  | 254.00 | 292.81  | 7.96  | 284.85  | 0.03 | 0.000000 | 0.29 | -       |

|           |      |        |      |          |        |        |         |        |         |      |          |      |        |
|-----------|------|--------|------|----------|--------|--------|---------|--------|---------|------|----------|------|--------|
| ZB3-3-80  | 286  | 173.92 | 0.69 | 0.000443 | 63.30  | 35.66  | 960.53  | 38.79  | 921.74  | 0.04 | 0.000195 | 0.35 | 69.50  |
| ZB3-3-81  | 289  | 86.42  | 1.34 | 0.000610 | 42.57  | 38.49  | 1575.34 | 75.01  | 1500.33 | 0.05 | 0.000018 | 0.84 | 228.23 |
| ZB3-3-82  | 399  | 135.62 | 0.75 | 0.000198 | 50.16  | 100.72 | 388.48  | 31.50  | 356.98  | 0.09 | 0.000000 | 0.41 | -      |
| ZB3-3-83  | 300  | 157.91 | 0.80 | 0.000212 | 93.88  | 50.31  | 829.06  | 35.67  | 793.39  | 0.04 | 0.000000 | 0.61 | -      |
| ZB3-3-84  | 306  | 204.55 | 1.41 | 0.000395 | 64.91  | 38.96  | 810.49  | 47.00  | 763.49  | 0.06 | 0.000321 | 0.59 | 90.60  |
| ZB3-3-85  | 282  | 124.35 | 1.16 | 0.000406 | 34.38  | 71.71  | 1198.68 | 57.04  | 1141.64 | 0.05 | 0.000001 | 0.51 | 944.62 |
| ZB3-3-86  | 289  | 118.34 | 1.13 | 0.000387 | 39.05  | 66.25  | 1452.37 | 58.54  | 1393.83 | 0.04 | 0.000020 | 0.41 | 169.51 |
| ZB3-3-87  | 374  | 171.90 | 0.78 | 0.000154 | 64.61  | 100.50 | 392.81  | 24.37  | 368.44  | 0.07 | 0.000000 | 0.38 | -      |
| ZB3-3-88  | 1859 | 76.25  | 0.32 | 0.000077 | 100.74 | 129.57 | 728.91  | 8.52   | 720.39  | 0.01 | 0.000009 | 0.01 | 32.44  |
| ZB3-3-89  | 286  | 96.57  | 0.78 | 0.000648 | 30.78  | 50.17  | 1725.42 | 54.54  | 1670.88 | 0.03 | 0.000015 | 0.13 | 193.33 |
| ZB3-3-91  | 1875 | 131.77 | 0.25 | 0.000161 | 35.58  | 174.45 | 468.25  | 7.17   | 461.08  | 0.02 | 0.000006 | 0.04 | 162.00 |
| ZB3-3-92  | 312  | 204.89 | 0.65 | 0.000107 | 55.36  | 169.13 | 418.01  | 17.16  | 400.85  | 0.04 | 0.000000 | 0.56 | -      |
| ZB3-3-93  | 1841 | 39.12  | 0.67 | 0.000124 | 55.65  | 145.07 | 255.04  | 19.85  | 235.19  | 0.08 | 0.000058 | 0.27 | 111.55 |
| ZB3-3-94  | 381  | 151.59 | 0.86 | 0.000233 | 81.58  | 52.52  | 463.27  | 31.50  | 431.77  | 0.07 | 0.000000 | 0.28 | -      |
| ZB3-3-95  | 290  | 123.19 | 0.68 | 0.000318 | 38.87  | 80.98  | 588.66  | 24.98  | 563.68  | 0.04 | 0.000128 | 0.20 | 91.48  |
| ZB3-3-96  | 293  | 82.89  | 0.85 | 0.000118 | 63.18  | 134.53 | 360.35  | 26.58  | 333.77  | 0.08 | 0.000000 | 0.27 | -      |
| ZB3-3-97  | 290  | 114.69 | 0.99 | 0.000370 | 62.11  | 43.50  | 1421.16 | 29.01  | 1392.15 | 0.02 | 0.000000 | 0.22 | -      |
| ZB3-3-98  | 286  | 189.55 | 0.87 | 0.000324 | 25.97  | 118.98 | 1010.96 | 38.87  | 972.09  | 0.04 | 0.000003 | 0.38 | 515.38 |
| ZB3-3-99  | 285  | 182.81 | 0.65 | 0.000208 | 97.03  | 49.51  | 1281.78 | 14.51  | 1267.27 | 0.01 | 0.000000 | 0.44 | -      |
| ZB3-3-100 | 311  | 189.98 | 0.46 | 0.000145 | 93.77  | 73.66  | 654.35  | 15.82  | 638.53  | 0.02 | 0.000065 | 0.33 | 60.34  |
| ZB3-3-101 | 291  | 78.58  | 0.82 | 0.003691 | 11.67  | 23.22  | 2811.06 | 112.86 | 2698.20 | 0.04 | 0.000006 | 0.01 | 594.69 |
| ZB3-3-102 | 299  | 125.57 | 0.87 | 0.000418 | 31.06  | 77.01  | 1045.92 | 35.80  | 1010.12 | 0.04 | 0.000061 | 0.26 | 114.88 |
| ZB3-3-103 | 2516 | 68.00  | 0.58 | 0.000219 | 28.12  | 162.12 | 503.37  | 23.95  | 479.42  | 0.05 | 0.000000 | 0.08 | -      |
| ZB3-3-104 | 2041 | 43.47  | 0.48 | 0.000172 | 153.70 | 37.87  | 1538.04 | 29.71  | 1508.33 | 0.02 | 0.000091 | 0.07 | 6.82   |
| ZB3-3-105 | 2529 | 67.25  | 0.70 | 0.000118 | 141.04 | 60.11  | 369.30  | 19.44  | 349.86  | 0.06 | 0.000003 | 0.19 | 364.40 |
| ZB3-3-106 | 291  | 107.60 | 1.19 | 0.000231 | 60.44  | 71.61  | 1241.58 | 46.88  | 1194.70 | 0.04 | 0.000040 | 0.55 | 90.06  |
| ZB3-3-107 | 282  | 110.52 | 0.64 | 0.000294 | 29.69  | 114.67 | 753.37  | 23.45  | 729.92  | 0.03 | 0.000044 | 0.16 | 107.72 |
| ZB3-3-108 | 302  | 75.98  | 1.47 | 0.000798 | 46.20  | 27.13  | 1317.22 | 52.22  | 1265.00 | 0.04 | 0.000000 | 0.16 | -      |
| ZB3-3-110 | 286  | 218.30 | 0.50 | 0.000115 | 58.54  | 148.75 | 494.18  | 13.87  | 480.31  | 0.03 | 0.000014 | 0.24 | 278.91 |

|          |      |        |      |          |        |        |         |        |         |      |          |      |         |
|----------|------|--------|------|----------|--------|--------|---------|--------|---------|------|----------|------|---------|
| ZB4-2-1  | 304  | 238.55 | 0.94 | 0.000365 | 46.91  | 58.46  | 738.91  | 35.81  | 703.10  | 0.05 | 0.000000 | 0.58 | -       |
| ZB4-2-3  | 294  | 206.05 | 0.42 | 0.000131 | 73.58  | 103.43 | 416.89  | 10.17  | 406.72  | 0.02 | 0.000251 | 0.22 | 37.37   |
| ZB4-2-4  | 296  | 150.17 | 0.56 | 0.000137 | 105.00 | 69.59  | 556.17  | 16.47  | 539.70  | 0.03 | 0.000000 | 0.26 | -       |
| ZB4-2-5  | 290  | 223.23 | 0.77 | 0.000451 | 61.47  | 36.07  | 1353.32 | 36.69  | 1316.63 | 0.03 | 0.000000 | 0.46 | -       |
| ZB4-2-6  | 291  | 84.09  | 0.87 | 0.001756 | 24.79  | 22.97  | 1940.72 | 103.72 | 1837.00 | 0.06 | 0.000002 | 0.04 | 1135.74 |
| ZB4-2-7  | 296  | 126.78 | 1.77 | 0.000340 | 132.33 | 22.24  | 1011.32 | 63.77  | 947.55  | 0.07 | 0.000002 | 0.53 | 1178.86 |
| ZB4-2-8  | 297  | 672.75 | 0.84 | 0.000381 | 31.16  | 84.28  | 813.05  | 64.00  | 749.05  | 0.09 | 0.007551 | 0.68 | 7.71    |
| ZB4-2-9  | 298  | 179.05 | 1.03 | 0.000411 | 41.33  | 58.83  | 1242.29 | 36.48  | 1205.81 | 0.03 | 0.000000 | 0.73 | -       |
| ZB4-2-10 | 291  | 83.64  | 0.50 | 0.000108 | 61.33  | 151.09 | 422.73  | 9.07   | 413.66  | 0.02 | 0.000000 | 0.22 | -       |
| ZB4-2-11 | 1842 | 15.30  | 0.42 | 0.000235 | 69.54  | 61.16  | 151.07  | 11.79  | 139.28  | 0.08 | 0.001332 | 0.06 | 27.61   |
| ZB4-2-12 | 1867 | 56.56  | 0.17 | 0.000071 | 65.52  | 213.68 | 441.80  | 6.54   | 435.26  | 0.02 | 0.000172 | 0.03 | 9.51    |
| ZB4-2-13 | 291  | 140.48 | 0.53 | 0.000317 | 81.64  | 38.67  | 673.36  | 18.98  | 654.38  | 0.03 | 0.000000 | 0.15 | -       |
| ZB4-2-15 | 301  | 358.34 | 0.60 | 0.000844 | 23.08  | 51.34  | 1328.94 | 40.96  | 1287.98 | 0.03 | 0.000000 | 0.22 | -       |
| ZB4-2-17 | 294  | 65.06  | 1.16 | 0.001164 | 43.27  | 19.85  | 1780.63 | 58.64  | 1721.99 | 0.03 | 0.000433 | 0.18 | 25.80   |
| ZB4-2-19 | 294  | 134.61 | 0.67 | 0.000124 | 124.27 | 65.09  | 598.66  | 15.10  | 583.56  | 0.03 | 0.000000 | 0.21 | -       |
| ZB4-2-20 | 294  | 180.16 | 0.66 | 0.000140 | 49.43  | 144.94 | 707.90  | 16.96  | 690.94  | 0.02 | 0.000450 | 0.20 | 22.31   |
| ZB4-2-21 | 295  | 78.51  | 0.63 | 0.000058 | 141.19 | 122.31 | 810.43  | 14.80  | 795.63  | 0.02 | 0.000000 | 0.43 | -       |
| ZB4-2-22 | 1803 | 64.19  | 0.29 | 0.000430 | 23.24  | 100.19 | 273.28  | 16.52  | 256.76  | 0.06 | 0.000239 | 0.10 | 51.94   |
| ZB4-2-23 | 2477 | 114.48 | 0.20 | 0.000204 | 47.02  | 104.05 | 366.25  | 35.20  | 331.05  | 0.11 | 0.000000 | 0.19 | -       |
| ZB4-2-24 | 302  | 211.72 | 0.99 | 0.000573 | 37.58  | 46.45  | 1260.00 | 54.53  | 1205.47 | 0.05 | 0.000000 | 0.65 | -       |
| ZB4-2-25 | 315  | 180.33 | 0.85 | 0.000457 | 50.38  | 43.40  | 961.87  | 37.58  | 924.29  | 0.04 | 0.000017 | 0.57 | 290.58  |
| ZB4-2-26 | 288  | 43.16  | 1.01 | 0.000794 | 42.69  | 29.51  | 3487.17 | 100.87 | 3386.30 | 0.03 | 0.001465 | 0.17 | 4.88    |
| ZB4-2-27 | 308  | 195.00 | 0.58 | 0.000142 | 125.34 | 56.01  | 519.44  | 14.94  | 504.50  | 0.03 | 0.000000 | 0.22 | -       |
| ZB4-2-28 | 292  | 122.67 | 0.66 | 0.000251 | 146.93 | 27.10  | 901.21  | 23.42  | 877.79  | 0.03 | 0.000002 | 0.30 | 399.19  |
| ZB4-2-30 | 2549 | 91.38  | 0.45 | 0.000302 | 32.39  | 102.38 | 698.34  | 15.48  | 682.86  | 0.02 | 0.000000 | 0.15 | -       |
| ZB4-2-31 | 296  | 215.99 | 0.48 | 0.000268 | 80.15  | 46.61  | 692.81  | 17.64  | 675.17  | 0.03 | 0.000000 | 0.25 | -       |
| ZB4-2-34 | 1847 | 131.74 | 0.51 | 0.000152 | 49.34  | 133.20 | 1281.45 | 10.54  | 1270.91 | 0.01 | 0.000007 | 0.04 | 22.57   |
| ZB4-2-35 | 323  | 268.81 | 0.38 | 0.000654 | 26.11  | 58.58  | 1222.37 | 35.26  | 1187.11 | 0.03 | 0.000000 | 0.56 | -       |
| ZB4-2-36 | 288  | 113.06 | 1.02 | 0.000261 | 149.81 | 25.56  | 633.82  | 55.62  | 578.20  | 0.10 | 0.000372 | 0.72 | 84.49   |
| ZB4-2-37 | 1873 | 36.81  | 0.68 | 0.000122 | 172.70 | 47.51  | 1196.27 | 30.73  | 1165.54 | 0.03 | 0.000107 | 0.04 | 8.78    |

|          |      |        |      |          |        |        |         |       |         |      |          |      |        |
|----------|------|--------|------|----------|--------|--------|---------|-------|---------|------|----------|------|--------|
| ZB4-2-38 | 369  | 126.30 | 0.94 | 0.000155 | 104.88 | 61.40  | 412.46  | 27.50 | 384.96  | 0.07 | 0.000295 | 0.32 | 118.82 |
| ZB4-2-39 | 288  | 51.77  | 1.70 | 0.000242 | 237.56 | 17.39  | 895.55  | 50.75 | 844.80  | 0.06 | 0.000078 | 0.28 | 80.52  |
| ZB4-2-40 | 2674 | 119.82 | 0.76 | 0.000115 | 43.88  | 198.23 | 440.29  | 14.46 | 425.83  | 0.03 | 0.000000 | 0.30 | -      |
| ZB4-2-41 | 372  | 442.55 | 0.76 | 0.000704 | 40.47  | 35.07  | 1631.17 | 89.49 | 1541.68 | 0.06 | 0.000045 | 0.69 | 291.28 |
| ZB4-2-42 | 2503 | 377.73 | 0.07 | 0.000077 | 26.05  | 501.68 | 274.24  | 6.42  | 267.82  | 0.02 | 0.000000 | 0.64 | -      |
| ZB4-2-43 | 289  | 162.89 | 1.45 | 0.000751 | 46.04  | 28.93  | 1252.08 | 89.17 | 1162.91 | 0.08 | 0.000299 | 0.33 | 99.05  |
| ZB4-2-44 | 292  | 128.73 | 0.39 | 0.000362 | 69.25  | 39.85  | 1007.94 | 10.54 | 997.40  | 0.01 | 0.000000 | 0.05 | -      |
| ZB4-2-45 | 290  | 110.07 | 1.12 | 0.000429 | 31.04  | 75.15  | 1124.57 | 74.21 | 1050.36 | 0.07 | 0.000117 | 0.33 | 161.40 |
| ZB4-2-47 | 287  | 126.06 | 0.56 | 0.000257 | 72.64  | 53.49  | 1025.04 | 14.48 | 1010.56 | 0.01 | 0.000000 | 0.22 | -      |
| ZB4-2-48 | 2008 | 76.14  | 0.20 | 0.000096 | 66.51  | 156.17 | 1841.24 | 17.10 | 1824.14 | 0.01 | 0.000000 | 0.01 | -      |
| ZB4-2-49 | 307  | 117.86 | 0.73 | 0.000150 | 77.33  | 86.45  | 664.71  | 32.97 | 631.74  | 0.05 | 0.000031 | 0.44 | 156.26 |
| ZB4-2-50 | 300  | 197.96 | 0.72 | 0.000254 | 143.37 | 27.43  | 617.03  | 35.90 | 581.13  | 0.06 | 0.000066 | 0.44 | 164.23 |
| ZB4-2-52 | 287  | 99.99  | 0.92 | 0.000553 | 48.81  | 37.08  | 1541.41 | 65.38 | 1476.03 | 0.04 | 0.000021 | 0.28 | 193.34 |
| ZB4-2-53 | 2512 | 100.53 | 0.62 | 0.000125 | 149.62 | 53.37  | 308.55  | 42.19 | 266.36  | 0.16 | 0.000480 | 0.63 | 103.17 |
| ZB4-2-54 | 319  | 141.80 | 1.31 | 0.000337 | 65.37  | 45.38  | 701.89  | 44.76 | 657.13  | 0.07 | 0.000000 | 0.56 | -      |
| ZB4-2-55 | 322  | 225.99 | 1.12 | 0.000356 | 58.04  | 48.42  | 1003.93 | 47.07 | 956.86  | 0.05 | 0.000000 | 0.54 | -      |
| ZB4-2-56 | 2545 | 124.62 | 0.43 | 0.000163 | 30.24  | 203.01 | 617.64  | 21.29 | 596.35  | 0.04 | 0.000000 | 0.57 | -      |
| ZB4-2-57 | 2522 | 33.49  | 0.99 | 0.000165 | 151.65 | 40.00  | 317.13  | 45.79 | 271.34  | 0.17 | 0.000118 | 0.44 | 168.20 |
| ZB4-2-58 | 299  | 142.17 | 0.84 | 0.000260 | 115.25 | 33.42  | 1017.47 | 44.44 | 973.03  | 0.05 | 0.000487 | 0.59 | 36.70  |
| ZB4-2-59 | 291  | 132.13 | 0.67 | 0.000784 | 20.52  | 62.18  | 1530.72 | 33.40 | 1497.32 | 0.02 | 0.000019 | 0.08 | 125.63 |
| ZB4-2-60 | 292  | 151.42 | 0.62 | 0.000244 | 120.04 | 34.17  | 822.68  | 22.68 | 800.00  | 0.03 | 0.000040 | 0.31 | 81.41  |
| ZB4-2-61 | 1867 | 69.64  | 0.87 | 0.000386 | 122.34 | 21.18  | 931.10  | 34.58 | 896.52  | 0.04 | 0.000006 | 0.14 | 202.23 |
| ZB4-2-62 | 312  | 110.26 | 0.67 | 0.000135 | 66.42  | 111.69 | 579.19  | 27.65 | 551.54  | 0.05 | 0.000003 | 0.45 | 757.76 |
| ZB4-2-63 | 282  | 132.59 | 1.18 | 0.000313 | 44.92  | 71.02  | 1141.06 | 52.98 | 1088.08 | 0.05 | 0.000214 | 0.32 | 61.52  |
| ZB4-2-64 | 2515 | 81.53  | 0.71 | 0.000182 | 130.20 | 42.28  | 475.24  | 82.09 | 393.15  | 0.21 | 0.020075 | 0.45 | 4.47   |
| ZB4-2-65 | 312  | 229.95 | 0.77 | 0.000597 | 68.17  | 24.56  | 970.89  | 53.62 | 917.27  | 0.06 | 0.000000 | 0.64 | -      |
| ZB4-2-68 | 283  | 52.56  | 0.87 | 0.000397 | 117.65 | 21.42  | 2000.99 | 46.09 | 1954.90 | 0.02 | 0.000043 | 0.25 | 30.39  |
| ZB4-2-69 | 280  | 72.57  | 0.97 | 0.000150 | 201.79 | 33.01  | 1670.99 | 37.44 | 1633.55 | 0.02 | 0.000050 | 0.37 | 24.78  |
| ZB4-2-70 | 1883 | 162.72 | 0.46 | 0.000565 | 8.85   | 200.00 | 651.25  | 12.96 | 638.29  | 0.02 | 0.000000 | 0.10 | -      |
| ZB4-2-71 | 292  | 105.87 | 1.20 | 0.000493 | 31.73  | 63.95  | 993.97  | 79.87 | 914.10  | 0.09 | 0.000000 | 0.30 | -      |

|           |      |        |      |          |        |        |         |        |         |      |          |      |         |
|-----------|------|--------|------|----------|--------|--------|---------|--------|---------|------|----------|------|---------|
| ZB4-2-72  | 373  | 537.79 | 0.40 | 0.000178 | 52.17  | 107.50 | 827.94  | 25.14  | 802.80  | 0.03 | 0.000001 | 0.73 | 1073.66 |
| ZB4-2-73  | 288  | 126.48 | 1.19 | 0.000426 | 39.20  | 59.90  | 1007.90 | 75.71  | 932.19  | 0.08 | 0.000164 | 0.37 | 129.00  |
| ZB4-2-74  | 365  | 618.96 | 0.59 | 0.000468 | 63.23  | 33.79  | 1038.31 | 65.11  | 973.20  | 0.07 | 0.000050 | 0.68 | 412.98  |
| ZB4-2-75  | 296  | 60.68  | 2.05 | 0.000144 | 123.76 | 56.21  | 704.33  | 51.94  | 652.39  | 0.08 | 0.000039 | 0.81 | 181.45  |
| ZB4-2-76  | 2484 | 204.13 | 0.48 | 0.000167 | 67.54  | 88.69  | 386.53  | 28.71  | 357.82  | 0.08 | 0.000000 | 0.27 | -       |
| ZB4-2-77  | 1878 | 197.96 | 0.08 | 0.000114 | 27.96  | 314.35 | 635.96  | 6.78   | 629.18  | 0.01 | 0.000042 | 0.11 | 34.54   |
| ZB4-2-78  | 282  | 109.28 | 1.28 | 0.000320 | 49.08  | 63.73  | 888.54  | 65.22  | 823.32  | 0.08 | 0.000009 | 0.46 | 549.00  |
| ZB4-2-79  | 302  | 230.32 | 0.98 | 0.000890 | 25.39  | 44.24  | 1499.77 | 67.70  | 1432.07 | 0.05 | 0.000000 | 0.53 | -       |
| ZB4-2-80  | 1850 | 82.90  | 0.36 | 0.000080 | 236.41 | 53.17  | 106.95  | 11.47  | 95.49   | 0.12 | 0.000000 | 0.19 | -       |
| ZB4-2-81  | 309  | 206.28 | 1.08 | 0.000847 | 70.06  | 16.85  | 1359.74 | 80.88  | 1278.86 | 0.06 | 0.000013 | 0.58 | 567.47  |
| ZB4-2-82  | 289  | 107.27 | 0.84 | 0.000293 | 201.47 | 16.96  | 1192.48 | 26.71  | 1165.77 | 0.02 | 0.000007 | 0.26 | 152.85  |
| ZB4-2-83  | 1799 | 131.47 | 0.08 | 0.000082 | 30.09  | 405.69 | 575.59  | 4.17   | 571.42  | 0.01 | 0.000011 | 0.02 | 34.34   |
| ZB4-2-84  | 2510 | 46.10  | 0.55 | 0.000267 | 132.03 | 28.42  | 1137.84 | 61.08  | 1076.76 | 0.06 | 0.000399 | 0.54 | 16.61   |
| ZB4-2-85  | 2017 | 22.81  | 0.32 | 0.000089 | 137.86 | 81.90  | 336.86  | 35.80  | 301.06  | 0.12 | 0.000664 | 0.37 | 22.98   |
| ZB4-2-86  | 298  | 120.04 | 1.10 | 0.000389 | 216.53 | 11.86  | 1814.88 | 70.22  | 1744.66 | 0.04 | 0.000126 | 0.64 | 43.72   |
| ZB4-2-87  | 287  | 86.28  | 1.30 | 0.000651 | 39.68  | 38.70  | 1395.56 | 111.03 | 1284.53 | 0.09 | 0.000458 | 0.28 | 76.38   |
| ZB4-2-88  | 282  | 218.25 | 1.20 | 0.000416 | 58.37  | 41.16  | 748.11  | 64.60  | 683.51  | 0.09 | 0.001114 | 0.38 | 49.51   |
| ZB4-2-89  | 2081 | 27.74  | 0.68 | 0.000309 | 31.62  | 102.24 | 785.35  | 42.49  | 742.86  | 0.06 | 0.005217 | 0.18 | 2.90    |
| ZB4-2-90  | 1887 | 48.45  | 0.59 | 0.000321 | 154.21 | 20.22  | 2523.47 | 44.97  | 2478.50 | 0.02 | 0.000101 | 0.08 | 5.61    |
| ZB4-2-91  | 309  | 129.02 | 0.26 | 0.000464 | 36.48  | 59.04  | 907.13  | 28.02  | 879.11  | 0.03 | 0.000092 | 0.83 | 37.90   |
| ZB4-2-92  | 286  | 105.19 | 1.58 | 0.000522 | 97.88  | 19.57  | 1402.43 | 71.43  | 1331.00 | 0.05 | 0.000010 | 0.48 | 362.83  |
| ZB4-2-94  | 380  | 194.71 | 0.82 | 0.000294 | 64.92  | 52.37  | 477.62  | 33.11  | 444.51  | 0.07 | 0.000053 | 0.26 | 353.48  |
| ZB4-2-95  | 308  | 90.40  | 1.27 | 0.000228 | 67.55  | 64.95  | 1183.74 | 44.54  | 1139.20 | 0.04 | 0.000251 | 0.37 | 35.18   |
| ZB4-2-96  | 314  | 119.84 | 1.51 | 0.000241 | 71.78  | 57.89  | 835.37  | 56.64  | 778.73  | 0.07 | 0.000044 | 0.70 | 216.45  |
| ZB4-2-97  | 283  | 191.50 | 0.46 | 0.000250 | 73.31  | 54.57  | 554.75  | 15.76  | 538.99  | 0.03 | 0.000000 | 0.19 | -       |
| ZB4-2-98  | 285  | 44.88  | 1.14 | 0.000744 | 80.17  | 16.77  | 3084.96 | 95.96  | 2989.00 | 0.03 | 0.000038 | 0.36 | 39.09   |
| ZB4-2-99  | 1816 | 11.50  | 0.22 | 0.000083 | 221.27 | 54.15  | 419.70  | 31.09  | 388.61  | 0.08 | 0.001116 | 0.33 | 4.55    |
| ZB4-2-100 | 308  | 281.70 | 1.03 | 0.000563 | 40.18  | 44.24  | 1015.44 | 50.12  | 965.32  | 0.05 | 0.000000 | 0.60 | -       |
| ZB4-2-101 | 283  | 84.87  | 0.90 | 0.000152 | 76.80  | 85.81  | 914.10  | 32.60  | 881.50  | 0.04 | 0.000055 | 0.25 | 74.07   |
| ZB4-2-102 | 284  | 144.32 | 0.60 | 0.000102 | 39.89  | 246.76 | 603.04  | 12.20  | 590.84  | 0.02 | 0.000000 | 0.25 | -       |

|           |      |         |      |          |        |        |         |       |         |      |          |      |        |
|-----------|------|---------|------|----------|--------|--------|---------|-------|---------|------|----------|------|--------|
| ZB4-2-103 | 323  | 133.51  | 1.40 | 0.000229 | 73.19  | 59.79  | 835.69  | 42.71 | 792.98  | 0.05 | 0.000040 | 0.62 | 146.03 |
| ZB4-2-104 | 309  | 431.58  | 0.50 | 0.000231 | 47.20  | 91.79  | 524.46  | 25.02 | 499.44  | 0.05 | 0.000060 | 0.74 | 233.59 |
| ZB4-2-106 | 348  | 81.15   | 0.80 | 0.000657 | 32.29  | 47.11  | 1398.75 | 69.73 | 1329.02 | 0.05 | 0.005088 | 0.61 | 3.00   |
| ZB4-2-107 | 2507 | 137.41  | 0.34 | 0.000176 | 47.64  | 119.05 | 326.78  | 11.97 | 314.81  | 0.04 | 0.000000 | 0.07 | -      |
| ZB4-2-108 | 2546 | 74.97   | 0.54 | 0.000146 | 78.85  | 86.59  | 327.15  | 30.77 | 296.38  | 0.10 | 0.000000 | 0.30 | -      |
| ZB4-2-109 | 1858 | 4.45    | 0.45 | 0.000076 | 205.21 | 64.44  | 182.87  | 18.37 | 164.50  | 0.11 | 0.000692 | 0.06 | 15.03  |
| ZB4-2-110 | 292  | 190.09  | 0.47 | 0.000134 | 84.67  | 88.28  | 1181.98 | 17.15 | 1164.83 | 0.01 | 0.000081 | 0.37 | 35.51  |
| ZB4-4-1   | 2503 | 153.17  | 0.32 | 0.000344 | 48.90  | 59.38  | 1064.80 | 23.53 | 1041.27 | 0.02 | 0.000009 | 0.07 | 220.39 |
| ZB4-4-2   | 1854 | 57.07   | 0.12 | 0.000067 | 65.49  | 226.68 | 707.96  | 7.52  | 700.44  | 0.01 | 0.000002 | 0.01 | 33.99  |
| ZB4-4-3   | 2497 | 1078.23 | 0.12 | 0.000074 | 46.92  | 287.65 | 248.59  | 5.27  | 243.31  | 0.02 | 0.000000 | 0.47 | -      |
| ZB4-4-4   | 1830 | 2.59    | 0.60 | 0.000067 | 158.20 | 94.89  | 148.47  | 19.72 | 128.75  | 0.15 | 0.000000 | 0.03 | -      |
| ZB4-4-5   | 2529 | 96.90   | 0.63 | 0.000289 | 74.03  | 46.77  | 464.37  | 33.10 | 431.27  | 0.08 | 0.000000 | 0.17 | -      |
| ZB4-4-6   | 2489 | 42.06   | 0.69 | 0.000103 | 81.26  | 119.35 | 270.71  | 20.44 | 250.27  | 0.08 | 0.000006 | 0.34 | 380.36 |
| ZB4-4-7   | 2506 | 66.05   | 1.34 | 0.000201 | 113.16 | 43.88  | 540.11  | 41.69 | 498.42  | 0.08 | 0.000060 | 0.38 | 166.66 |
| ZB4-4-8   | 2594 | 50.43   | 0.39 | 0.000099 | 56.81  | 177.41 | 369.69  | 28.54 | 341.15  | 0.08 | 0.002559 | 0.68 | 4.85   |
| ZB4-4-9   | 2526 | 186.62  | 0.39 | 0.000084 | 50.98  | 234.12 | 335.67  | 17.66 | 318.01  | 0.06 | 0.000000 | 0.38 | -      |
| ZB4-4-10  | 1850 | 128.00  | 0.26 | 0.000066 | 93.29  | 162.55 | 1443.64 | 9.08  | 1434.56 | 0.01 | 0.000004 | 0.02 | 18.78  |
| ZB4-4-11  | 1860 | 179.43  | 0.17 | 0.000075 | 102.53 | 129.77 | 2634.15 | 9.90  | 2624.25 | 0.00 | 0.000000 | 0.01 | -      |
| ZB4-4-12  | 3195 | 120.73  | 0.32 | 0.000174 | 61.02  | 94.43  | 549.12  | 19.24 | 529.88  | 0.04 | 0.000458 | 0.39 | 19.23  |
| ZB4-4-13  | 1873 | 205.69  | 0.13 | 0.000057 | 58.93  | 296.38 | 1396.89 | 4.98  | 1391.91 | 0.00 | 0.000000 | 0.03 | -      |
| ZB4-4-14  | 2499 | 107.57  | 0.77 | 0.000096 | 70.88  | 147.32 | 307.24  | 23.91 | 283.33  | 0.08 | 0.000000 | 0.19 | -      |
| ZB4-4-15  | 1710 | 3.02    | 0.88 | 0.000085 | 16.58  | 709.89 | 334.03  | 26.41 | 307.62  | 0.09 | 0.000531 | 0.01 | 7.71   |
| ZB4-4-16  | 2515 | 89.11   | 0.71 | 0.000139 | 171.97 | 41.74  | 378.35  | 45.69 | 332.66  | 0.14 | 0.000000 | 0.40 | -      |
| ZB4-4-17  | 328  | 274.55  | 0.63 | 0.000134 | 52.40  | 142.38 | 555.35  | 22.16 | 533.19  | 0.04 | 0.000000 | 0.49 | -      |
| ZB4-4-18  | 323  | 167.13  | 0.59 | 0.000959 | 47.39  | 22.00  | 1130.69 | 39.40 | 1091.29 | 0.04 | 0.000300 | 0.39 | 48.94  |
| ZB4-4-19  | 1818 | 95.56   | 0.61 | 0.000160 | 52.63  | 119.11 | 366.69  | 15.88 | 350.81  | 0.05 | 0.000000 | 0.16 | -      |
| ZB4-4-20  | 289  | 129.79  | 1.11 | 0.000302 | 119.05 | 27.83  | 617.95  | 50.78 | 567.17  | 0.09 | 0.001311 | 0.48 | 37.86  |
| ZB4-4-21  | 1807 | 62.18   | 0.13 | 0.000572 | 7.02   | 249.02 | 284.89  | 9.23  | 275.66  | 0.03 | 0.000000 | 0.01 | -      |
| ZB4-4-22  | 340  | 42.14   | 1.25 | 0.000091 | 168.80 | 65.17  | 770.61  | 26.56 | 744.05  | 0.04 | 0.000027 | 0.32 | 60.34  |

|          |      |        |      |          |        |        |         |        |         |      |          |      |        |
|----------|------|--------|------|----------|--------|--------|---------|--------|---------|------|----------|------|--------|
| ZB4-4-23 | 1855 | 195.77 | 0.22 | 0.000134 | 58.43  | 127.26 | 720.63  | 6.97   | 713.66  | 0.01 | 0.000000 | 1.00 | -      |
| ZB4-4-24 | 1847 | 86.00  | 0.21 | 0.000053 | 97.73  | 191.94 | 619.52  | 5.71   | 613.81  | 0.01 | 0.000131 | 0.00 | 4.60   |
| ZB4-4-25 | 2104 | 36.83  | 0.68 | 0.000049 | 67.78  | 301.97 | 326.83  | 27.02  | 299.81  | 0.09 | 0.000128 | 0.33 | 124.19 |
| ZB4-4-26 | 1879 | 176.46 | 0.21 | 0.000089 | 55.00  | 204.29 | 1295.01 | 6.53   | 1288.48 | 0.01 | 0.000000 | 0.03 | -      |
| ZB4-4-27 | 1821 | 21.52  | 0.17 | 0.000108 | 47.59  | 194.28 | 135.82  | 5.36   | 130.46  | 0.04 | 0.000345 | 0.04 | 15.28  |
| ZB4-4-28 | 1860 | 28.26  | 0.67 | 0.000613 | 68.36  | 23.86  | 1342.55 | 55.34  | 1287.21 | 0.04 | 0.000140 | 0.13 | 21.67  |
| ZB4-4-29 | 1878 | 132.69 | 0.18 | 0.000062 | 74.53  | 215.56 | 1013.75 | 5.47   | 1008.28 | 0.01 | 0.000000 | 0.01 | -      |
| ZB4-4-30 | 1874 | 238.02 | 0.13 | 0.000076 | 45.63  | 288.36 | 1532.10 | 5.14   | 1526.96 | 0.00 | 0.000001 | 0.03 | 20.82  |
| ZB4-4-31 | 1855 | 73.70  | 0.48 | 0.000139 | 139.22 | 51.59  | 395.20  | 18.27  | 376.93  | 0.05 | 0.000000 | 0.12 | -      |
| ZB4-4-32 | 2504 | 95.77  | 0.50 | 0.000116 | 58.90  | 146.01 | 474.16  | 12.26  | 461.90  | 0.03 | 0.000000 | 0.18 | -      |
| ZB4-4-33 | 2526 | 22.44  | 2.09 | 0.000359 | 252.98 | 11.02  | 1441.63 | 137.63 | 1304.00 | 0.11 | 0.000251 | 0.55 | 46.18  |
| ZB4-4-34 | 343  | 167.32 | 0.76 | 0.000283 | 100.33 | 35.21  | 723.94  | 42.53  | 681.41  | 0.06 | 0.000000 | 0.44 | -      |
| ZB4-4-35 | 1807 | 2.04   | 0.35 | 0.000050 | 237.07 | 85.09  | 157.73  | 12.50  | 145.23  | 0.09 | 0.000000 | 0.02 | -      |
| ZB4-4-36 | 401  | 112.24 | 0.82 | 0.000182 | 81.94  | 67.22  | 503.68  | 22.66  | 481.02  | 0.05 | 0.000011 | 0.29 | 240.14 |
| ZB4-4-37 | 2491 | 159.56 | 1.17 | 0.000200 | 83.82  | 59.60  | 719.55  | 37.25  | 682.30  | 0.05 | 0.000019 | 0.22 | 320.45 |
| ZB4-4-38 | 1853 | 135.69 | 0.04 | 0.000065 | 29.22  | 529.03 | 451.13  | 3.95   | 447.18  | 0.01 | 0.000025 | 0.06 | 27.32  |
| ZB4-4-39 | 2016 | 44.04  | 0.15 | 0.000070 | 106.52 | 134.18 | 1319.79 | 33.48  | 1286.31 | 0.03 | 0.001733 | 0.29 | 0.69   |
| ZB4-4-40 | 2518 | 80.00  | 0.75 | 0.000110 | 94.54  | 96.07  | 470.25  | 25.43  | 444.82  | 0.06 | 0.000085 | 0.43 | 77.94  |
| ZB4-4-41 | 330  | 119.58 | 0.77 | 0.000164 | 77.15  | 79.15  | 429.89  | 32.42  | 397.47  | 0.08 | 0.000000 | 0.45 | -      |
| ZB4-4-42 | 2516 | 209.69 | 0.20 | 0.001833 | 1.95   | 279.81 | 660.88  | 9.99   | 650.89  | 0.02 | 0.000172 | 0.21 | 29.45  |
| ZB4-4-43 | 326  | 142.19 | 0.69 | 0.000093 | 104.04 | 103.78 | 368.55  | 25.21  | 343.34  | 0.07 | 0.000031 | 0.62 | 269.47 |
| ZB4-4-44 | 1903 | 75.45  | 0.34 | 0.000103 | 128.47 | 75.25  | 1269.75 | 15.27  | 1254.48 | 0.01 | 0.000041 | 0.03 | 11.60  |
| ZB4-4-45 | 311  | 132.61 | 0.95 | 0.000312 | 109.03 | 29.42  | 618.33  | 52.53  | 565.80  | 0.09 | 0.000007 | 0.62 | 689.16 |
| ZB4-4-46 | 1671 | 27.85  | 0.94 | 0.000212 | 13.22  | 357.61 | 861.93  | 29.48  | 832.45  | 0.04 | 0.000148 | 0.11 | 8.26   |
| ZB4-4-47 | 1805 | 271.06 | 0.35 | 0.000089 | 94.91  | 118.39 | 256.09  | 8.59   | 247.50  | 0.03 | 0.000000 | 0.09 | -      |
| ZB4-4-48 | 2559 | 160.96 | 0.86 | 0.000103 | 45.98  | 210.68 | 199.69  | 15.10  | 184.59  | 0.08 | 0.000000 | 0.17 | -      |
| ZB4-4-49 | 1845 | 91.68  | 0.43 | 0.000110 | 67.44  | 134.64 | 483.63  | 7.53   | 476.10  | 0.02 | 0.000000 | 0.01 | -      |
| ZB4-4-50 | 2483 | 61.99  | 1.36 | 0.000158 | 136.44 | 46.25  | 427.04  | 47.55  | 379.49  | 0.13 | 0.000000 | 0.45 | -      |
| ZB4-4-51 | 1871 | 146.24 | 0.21 | 0.000065 | 99.74  | 155.08 | 1208.19 | 7.06   | 1201.13 | 0.01 | 0.000000 | 0.02 | -      |
| ZB4-4-53 | 2548 | 138.73 | 0.45 | 0.000262 | 36.22  | 105.50 | 531.81  | 16.15  | 515.66  | 0.03 | 0.000000 | 0.03 | -      |



|          |      |        |      |          |        |        |         |       |         |      |          |      |        |
|----------|------|--------|------|----------|--------|--------|---------|-------|---------|------|----------|------|--------|
| ZB4-4-54 | 1876 | 70.13  | 0.32 | 0.000087 | 112.70 | 102.13 | 1636.33 | 15.23 | 1621.10 | 0.01 | 0.000013 | 0.02 | 7.85   |
| ZB4-4-55 | 1842 | 93.34  | 0.32 | 0.000088 | 73.48  | 154.14 | 676.96  | 6.66  | 670.30  | 0.01 | 0.000000 | 0.04 | -      |
| ZB4-4-56 | 2160 | 51.38  | 0.36 | 0.000121 | 121.52 | 67.89  | 771.30  | 14.35 | 756.95  | 0.02 | 0.000028 | 0.07 | 19.89  |
| ZB4-4-57 | 1854 | 108.99 | 0.12 | 0.000065 | 66.79  | 231.09 | 997.72  | 5.83  | 991.89  | 0.01 | 0.000000 | 0.01 | -      |
| ZB4-4-58 | 1839 | 114.78 | 0.18 | 0.000067 | 101.28 | 147.22 | 1587.80 | 8.77  | 1579.03 | 0.01 | 0.000014 | 0.02 | 8.68   |
| ZB4-4-59 | 2488 | 147.58 | 0.69 | 0.000433 | 66.47  | 34.75  | 844.08  | 16.54 | 827.54  | 0.02 | 0.000000 | 0.09 | -      |
| ZB4-4-60 | 1883 | 65.91  | 0.71 | 0.000196 | 127.79 | 39.82  | 2117.26 | 25.96 | 2091.30 | 0.01 | 0.000039 | 0.07 | 6.19   |
| ZB4-4-61 | 1877 | 59.07  | 0.32 | 0.000072 | 85.66  | 161.14 | 862.14  | 9.58  | 852.56  | 0.01 | 0.000000 | 0.04 | -      |
| ZB4-4-62 | 300  | 269.63 | 0.78 | 0.000890 | 38.78  | 28.96  | 1198.18 | 48.73 | 1149.45 | 0.04 | 0.000000 | 0.51 | -      |
| ZB4-4-63 | 374  | 294.16 | 0.56 | 0.000368 | 16.66  | 163.22 | 763.55  | 37.29 | 726.26  | 0.05 | 0.000006 | 0.64 | 803.89 |
| ZB4-4-64 | 1863 | 8.27   | 0.03 | 0.000051 | 32.77  | 602.82 | 128.39  | 3.68  | 124.71  | 0.03 | 0.000000 | 1.00 | -      |
| ZB4-4-65 | 1875 | 92.72  | 0.20 | 0.000044 | 142.52 | 158.53 | 876.95  | 6.90  | 870.05  | 0.01 | 0.000000 | 0.02 | -      |
| ZB4-4-66 | 1871 | 114.61 | 0.11 | 0.000057 | 84.71  | 205.56 | 839.82  | 4.98  | 834.84  | 0.01 | 0.000000 | 0.02 | -      |
| ZB4-4-67 | 1904 | 40.27  | 0.37 | 0.000133 | 98.15  | 76.88  | 705.30  | 23.71 | 681.59  | 0.03 | 0.000370 | 0.11 | 7.74   |
| ZB4-4-68 | 1827 | 74.76  | 0.12 | 0.000037 | 82.09  | 330.03 | 478.67  | 4.31  | 474.36  | 0.01 | 0.000000 | 0.01 | -      |
| ZB4-4-69 | 1860 | 217.31 | 0.20 | 0.000062 | 76.22  | 212.41 | 1346.59 | 5.76  | 1340.83 | 0.00 | 0.000000 | 0.05 | -      |
| ZB4-4-70 | 2457 | 100.82 | 1.55 | 0.000196 | 34.62  | 147.68 | 303.29  | 30.66 | 272.63  | 0.11 | 0.000000 | 0.16 | -      |
| ZB4-4-71 | 1988 | 62.75  | 0.42 | 0.000317 | 98.66  | 32.02  | 1573.03 | 48.43 | 1524.60 | 0.03 | 0.001180 | 0.26 | 8.47   |
| ZB4-4-72 | 1872 | 166.81 | 0.09 | 0.000130 | 31.62  | 242.93 | 679.04  | 9.30  | 669.74  | 0.01 | 0.000000 | 0.04 | -      |
| ZB4-4-73 | 2478 | 112.77 | 1.20 | 0.000309 | 34.11  | 94.95  | 579.85  | 38.48 | 541.37  | 0.07 | 0.000000 | 0.12 | -      |
| ZB4-4-74 | 2474 | 378.89 | 0.16 | 0.001303 | 7.95   | 96.52  | 939.86  | 13.80 | 926.06  | 0.01 | 0.000000 | 0.16 | -      |
| ZB4-4-75 | 1861 | 72.17  | 0.35 | 0.000100 | 120.56 | 82.87  | 1066.39 | 12.73 | 1053.66 | 0.01 | 0.000040 | 0.06 | 11.22  |
| ZB4-4-76 | 1827 | 93.98  | 0.28 | 0.000100 | 131.01 | 76.65  | 1337.43 | 11.24 | 1326.19 | 0.01 | 0.000044 | 0.00 | 8.80   |
| ZB4-4-77 | 1857 | 17.95  | 0.71 | 0.000067 | 85.45  | 174.62 | 159.40  | 5.16  | 154.24  | 0.03 | 0.000000 | 0.00 | -      |
| ZB4-4-78 | 3110 | 210.21 | 0.12 | 0.000166 | 24.10  | 249.36 | 296.40  | 6.08  | 290.32  | 0.02 | 0.000162 | 0.74 | 22.18  |
| ZB4-4-79 | 2538 | 225.89 | 0.64 | 0.000035 | 138.83 | 206.44 | 245.40  | 7.49  | 237.91  | 0.03 | 0.000115 | 0.71 | 61.05  |
| ZB4-4-80 | 1886 | 6.35   | 0.12 | 0.000091 | 80.70  | 136.31 | 133.12  | 7.56  | 125.56  | 0.06 | 0.000552 | 0.07 | 12.57  |
| ZB4-4-81 | 2490 | 149.30 | 0.99 | 0.000203 | 56.12  | 87.90  | 1161.22 | 14.60 | 1146.62 | 0.01 | 0.000001 | 0.02 | 337.08 |
| ZB4-4-82 | 324  | 88.73  | 1.14 | 0.000481 | 65.99  | 31.48  | 921.97  | 65.00 | 856.97  | 0.08 | 0.000033 | 0.50 | 217.27 |
| ZB4-4-83 | 300  | 287.18 | 0.92 | 0.000463 | 40.93  | 52.75  | 807.03  | 33.45 | 773.58  | 0.04 | 0.000000 | 0.61 | -      |

|           |      |        |      |          |        |        |         |       |         |      |          |      |        |
|-----------|------|--------|------|----------|--------|--------|---------|-------|---------|------|----------|------|--------|
| ZB4-4-84  | 1871 | 91.74  | 0.34 | 0.000282 | 12.84  | 275.96 | 324.44  | 11.44 | 313.00  | 0.04 | 0.000000 | 0.03 | -      |
| ZB4-4-85  | 304  | 200.17 | 1.19 | 0.000429 | 53.70  | 43.39  | 909.68  | 50.59 | 859.09  | 0.06 | 0.000077 | 0.48 | 157.89 |
| ZB4-4-86  | 1735 | 60.08  | 0.68 | 0.000483 | 7.90   | 262.02 | 512.00  | 18.15 | 493.85  | 0.04 | 0.000000 | 0.03 | -      |
| ZB4-4-87  | 2499 | 245.91 | 0.20 | 0.000138 | 51.33  | 141.67 | 428.52  | 4.39  | 424.13  | 0.01 | 0.000000 | 1.00 | -      |
| ZB4-4-88  | 317  | 99.55  | 0.54 | 0.000105 | 47.21  | 202.44 | 364.43  | 21.12 | 343.31  | 0.06 | 0.000000 | 0.42 | -      |
| ZB4-4-89  | 1849 | 31.68  | 0.13 | 0.000103 | 58.98  | 163.94 | 197.63  | 5.62  | 192.01  | 0.03 | 0.000000 | 0.02 | -      |
| ZB4-4-90  | 1854 | 72.43  | 0.46 | 0.000058 | 137.32 | 126.49 | 1202.86 | 12.35 | 1190.51 | 0.01 | 0.000001 | 0.04 | 48.58  |
| ZB4-4-91  | 1838 | 17.31  | 0.25 | 0.000097 | 100.56 | 102.47 | 320.27  | 12.54 | 307.73  | 0.04 | 0.000551 | 0.09 | 6.03   |
| ZB4-4-92  | 2647 | 145.37 | 0.38 | 0.000076 | 25.22  | 524.26 | 400.85  | 7.30  | 393.55  | 0.02 | 0.000000 | 0.30 | -      |
| ZB4-4-93  | 1831 | 4.34   | 0.49 | 0.000106 | 115.75 | 81.28  | 108.15  | 18.54 | 89.61   | 0.21 | 0.000256 | 0.08 | 80.71  |
| ZB4-4-94  | 1919 | 226.75 | 0.40 | 0.000326 | 37.04  | 82.88  | 749.56  | 25.76 | 723.80  | 0.04 | 0.000058 | 0.22 | 120.17 |
| ZB4-4-95  | 2505 | 47.42  | 1.25 | 0.000253 | 34.92  | 113.35 | 714.39  | 42.53 | 671.86  | 0.06 | 0.000213 | 0.47 | 34.04  |
| ZB4-4-96  | 2287 | 118.01 | 0.45 | 0.000226 | 29.19  | 151.83 | 358.37  | 12.09 | 346.28  | 0.03 | 0.000003 | 0.12 | 593.99 |
| ZB4-4-97  | 1882 | 69.58  | 0.09 | 0.000158 | 25.66  | 246.72 | 516.25  | 7.84  | 508.41  | 0.02 | 0.000156 | 0.27 | 6.93   |
| ZB4-4-98  | 2498 | 123.50 | 1.14 | 0.000242 | 42.20  | 97.96  | 460.39  | 32.46 | 427.93  | 0.08 | 0.000000 | 0.22 | -      |
| ZB4-4-99  | 1874 | 90.03  | 0.23 | 0.000124 | 85.90  | 93.72  | 872.19  | 9.65  | 862.54  | 0.01 | 0.000026 | 0.05 | 18.50  |
| ZB4-4-100 | 1895 | 79.25  | 0.47 | 0.000084 | 105.92 | 112.91 | 1310.89 | 13.73 | 1297.16 | 0.01 | 0.000020 | 0.03 | 9.36   |
| ZB4-4-101 | 2436 | 58.24  | 0.99 | 0.000581 | 58.00  | 29.68  | 1504.88 | 93.43 | 1411.45 | 0.07 | 0.000058 | 0.56 | 117.56 |
| ZB4-4-102 | 326  | 85.33  | 0.66 | 0.000092 | 48.09  | 226.11 | 320.99  | 18.95 | 302.04  | 0.06 | 0.000000 | 0.28 | -      |
| ZB4-4-103 | 1833 | 11.30  | 0.06 | 0.000049 | 53.88  | 376.45 | 141.48  | 3.70  | 137.78  | 0.03 | 0.000000 | 0.03 | -      |
| ZB4-4-104 | 2505 | 193.33 | 0.99 | 0.000165 | 36.15  | 167.38 | 328.35  | 16.91 | 311.44  | 0.05 | 0.000000 | 0.13 | -      |
| ZB4-4-105 | 1896 | 137.42 | 0.31 | 0.000083 | 73.90  | 162.65 | 1002.26 | 8.02  | 994.24  | 0.01 | 0.000201 | 0.03 | 5.70   |
| ZB4-4-106 | 1836 | 35.91  | 0.07 | 0.000081 | 47.59  | 260.12 | 381.57  | 9.59  | 371.98  | 0.03 | 0.000485 | 0.19 | 2.34   |
| ZB4-4-107 | 295  | 673.07 | 0.31 | 0.000084 | 48.87  | 244.73 | 193.72  | 9.27  | 184.45  | 0.05 | 0.000000 | 0.80 | -      |
| ZB4-4-108 | 327  | 113.72 | 0.79 | 0.000170 | 86.81  | 67.75  | 533.33  | 22.48 | 510.85  | 0.04 | 0.000000 | 0.30 | -      |
| ZB4-4-109 | 1896 | 112.35 | 0.09 | 0.000064 | 46.67  | 337.38 | 598.53  | 3.67  | 594.86  | 0.01 | 0.000000 | 0.02 | -      |
| ZB4-4-110 | 1868 | 48.59  | 0.52 | 0.000176 | 133.88 | 42.33  | 1404.42 | 26.31 | 1378.11 | 0.02 | 0.000045 | 0.04 | 11.89  |
