# Supplementary material
Source: publisher figshare collection journal article supplement (https://gsapubs.figshare.com/articles/dataset/_/24470773)
Supplement: Supplementary file 4 [file 1]

Supplementary Table S3. Hf isotope analyses of zircons from Zibo bauxite-clay in eastern North China Block

| Spots    | $^{176}\text{Yb}/^{178}\text{Hf}$ | $^{176}\text{Lu}/^{178}\text{Hf}$ | 2 $\sigma$ | $^{176}\text{Hf}/^{178}\text{Hf}$ | 2 $\sigma$ | Age(Ma) | I <sub>Hf</sub> | $\epsilon_{\text{Hf}}(0)$ | $\epsilon_{\text{Hf}}(t)$ | T <sub>DM</sub> <sup>Hf</sup> | T <sub>DM</sub> <sup>C</sup> | T <sub>CHUR</sub> | f <sub>Lu/Hf</sub> |
|----------|-----------------------------------|-----------------------------------|------------|-----------------------------------|------------|---------|-----------------|---------------------------|---------------------------|-------------------------------|------------------------------|-------------------|--------------------|
| ZB2-2-2  | 0.058192                          | 0.001589                          | 0.000022   | 0.28234                           | 0.000015   | 291.2   | 0.282331        | -15.28                    | -9.21                     | 1309                          | 1892                         | 728               | -0.95              |
| ZB2-2-5  | 0.047918                          | 0.001357                          | 0.000013   | 0.282214                          | 0.000013   | 296.8   | 0.282207        | -19.73                    | -13.47                    | 1479                          | 2168                         | 931               | -0.96              |
| ZB2-2-7  | 0.099898                          | 0.002952                          | 0.000032   | 0.282375                          | 0.00002    | 288     | 0.282359        | -14.04                    | -8.29                     | 1307                          | 1832                         | 699               | -0.91              |
| ZB2-2-8  | 0.070108                          | 0.001848                          | 0.00002    | 0.282392                          | 0.000018   | 285.8   | 0.282382        | -13.44                    | -7.52                     | 1244                          | 1783                         | 646               | -0.94              |
| ZB2-2-20 | 0.125509                          | 0.002983                          | 0.000094   | 0.282139                          | 0.000016   | 293     | 0.282123        | -22.39                    | -16.53                    | 1656                          | 2356                         | 1112              | -0.91              |
| ZB2-2-23 | 0.059454                          | 0.001558                          | 0.000018   | 0.282071                          | 0.000014   | 292.3   | 0.282063        | -24.79                    | -18.67                    | 1689                          | 2491                         | 1175              | -0.95              |
| ZB2-2-26 | 0.062157                          | 0.00179                           | 0.000005   | 0.282311                          | 0.00002    | 291.4   | 0.282301        | -16.3                     | -10.27                    | 1358                          | 1960                         | 781               | -0.95              |
| ZB2-2-27 | 0.079283                          | 0.002167                          | 0.000028   | 0.282164                          | 0.000019   | 292.2   | 0.282152        | -21.5                     | -15.52                    | 1584                          | 2292                         | 1040              | -0.93              |
| ZB2-2-30 | 0.111849                          | 0.002948                          | 0.00009    | 0.282438                          | 0.000024   | 292.2   | 0.282422        | -11.81                    | -5.97                     | 1214                          | 1689                         | 589               | -0.91              |
| ZB2-2-38 | 0.079737                          | 0.001922                          | 0.000023   | 0.282095                          | 0.000015   | 280     | 0.282085        | -23.94                    | -18.16                    | 1671                          | 2448                         | 1148              | -0.94              |
| ZB2-2-39 | 0.031105                          | 0.000912                          | 0.000031   | 0.281949                          | 0.000027   | 377.9   | 0.281943        | -29.1                     | -21.03                    | 1829                          | 2703                         | 1350              | -0.97              |
| ZB2-2-42 | 0.081022                          | 0.002061                          | 0.000025   | 0.282055                          | 0.000014   | 293.2   | 0.282044        | -25.36                    | -19.32                    | 1735                          | 2532                         | 1221              | -0.94              |
| ZB2-2-44 | 0.07011                           | 0.001967                          | 0.000018   | 0.282369                          | 0.000027   | 298.7   | 0.282358        | -14.25                    | -8.09                     | 1281                          | 1828                         | 687               | -0.94              |
| ZB2-2-48 | 0.150968                          | 0.003646                          | 0.00004    | 0.282143                          | 0.000018   | 291     | 0.282123        | -22.24                    | -16.57                    | 1681                          | 2355                         | 1129              | -0.89              |
| ZB2-2-50 | 0.045723                          | 0.001141                          | 0.00001    | 0.282375                          | 0.000016   | 288.9   | 0.282369        | -14.04                    | -7.91                     | 1245                          | 1811                         | 660               | -0.97              |
| ZB2-2-53 | 0.072273                          | 0.001781                          | 0.000006   | 0.282407                          | 0.000014   | 282.9   | 0.282398        | -12.91                    | -7.02                     | 1220                          | 1749                         | 619               | -0.95              |
| ZB2-2-57 | 0.052271                          | 0.001214                          | 0.000017   | 0.28236                           | 0.000014   | 291.5   | 0.282353        | -14.57                    | -8.42                     | 1268                          | 1843                         | 686               | -0.96              |
| ZB2-2-58 | 0.043268                          | 0.001058                          | 0.000016   | 0.282072                          | 0.000017   | 301     | 0.282066        | -24.75                    | -18.37                    | 1665                          | 2478                         | 1155              | -0.97              |
| ZB2-2-64 | 0.110913                          | 0.002672                          | 0.000039   | 0.282133                          | 0.000019   | 298.9   | 0.282118        | -22.6                     | -16.58                    | 1651                          | 2363                         | 1111              | -0.92              |
| ZB2-2-65 | 0.072648                          | 0.001722                          | 0.000008   | 0.282094                          | 0.000018   | 285.6   | 0.282085        | -23.98                    | -18.04                    | 1664                          | 2446                         | 1143              | -0.95              |
| ZB2-2-66 | 0.082831                          | 0.002352                          | 0.000027   | 0.281942                          | 0.000015   | 370.4   | 0.281926        | -29.35                    | -21.8                     | 1911                          | 2744                         | 1424              | -0.93              |
| ZB2-2-67 | 0.09616                           | 0.002226                          | 0.000044   | 0.282188                          | 0.000016   | 282     | 0.282176        | -20.65                    | -14.9                     | 1551                          | 2244                         | 1002              | -0.93              |
| ZB2-2-71 | 0.072325                          | 0.001761                          | 0.000015   | 0.282179                          | 0.000019   | 294.1   | 0.282169        | -20.97                    | -14.88                    | 1545                          | 2253                         | 1002              | -0.95              |
| ZB2-2-77 | 0.039086                          | 0.001001                          | 0.00001    | 0.282359                          | 0.000018   | 280.3   | 0.282354        | -14.61                    | -8.63                     | 1262                          | 1849                         | 683               | -0.97              |
| ZB2-2-80 | 0.074645                          | 0.001783                          | 0.000024   | 0.282117                          | 0.000017   | 282.8   | 0.282108        | -23.16                    | -17.28                    | 1634                          | 2397                         | 1106              | -0.95              |

|           |          |          |          |          |          |       |          |        |        |      |      |      |       |
|-----------|----------|----------|----------|----------|----------|-------|----------|--------|--------|------|------|------|-------|
| ZB2-2-95  | 0.07513  | 0.001925 | 0.00007  | 0.282176 | 0.00002  | 282   | 0.282166 | -21.08 | -15.25 | 1556 | 2268 | 1012 | -0.94 |
| ZB2-2-102 | 0.023513 | 0.000527 | 0.000012 | 0.281333 | 0.000016 | 2545  | 0.281307 | -50.89 | 5.29   | 2648 | 2712 | 2311 | -0.98 |
| ZB2-2-108 | 0.076645 | 0.001752 | 0.00004  | 0.282316 | 0.000022 | 289.5 | 0.282307 | -16.13 | -10.09 | 1349 | 1949 | 772  | -0.95 |
| ZB2-2-109 | 0.070749 | 0.001683 | 0.000019 | 0.282217 | 0.000017 | 284.1 | 0.282208 | -19.63 | -13.72 | 1488 | 2173 | 936  | -0.95 |
| ZB3-1-1   | 0.053898 | 0.001486 | 0.00001  | 0.282234 | 0.000015 | 308.6 | 0.282225 | -19.03 | -12.58 | 1456 | 2119 | 902  | -0.96 |
| ZB3-1-2   | 0.043047 | 0.000963 | 0.000015 | 0.282362 | 0.000016 | 287   | 0.282357 | -14.5  | -8.38  | 1257 | 1839 | 678  | -0.97 |
| ZB3-1-3   | 0.013368 | 0.000319 | 0.000002 | 0.281285 | 0.000015 | 2516  | 0.28127  | -52.59 | 3.31   | 2698 | 2812 | 2372 | -0.99 |
| ZB3-1-5   | 0.047325 | 0.001347 | 0.000021 | 0.282212 | 0.000017 | 308.2 | 0.282204 | -19.8  | -13.33 | 1481 | 2165 | 934  | -0.96 |
| ZB3-1-7   | 0.062108 | 0.001471 | 0.000024 | 0.282211 | 0.000017 | 315.1 | 0.282202 | -19.84 | -13.25 | 1488 | 2166 | 940  | -0.96 |
| ZB3-1-9   | 0.019488 | 0.00052  | 0.000009 | 0.282196 | 0.000016 | 310.7 | 0.282193 | -20.37 | -13.66 | 1472 | 2191 | 937  | -0.98 |
| ZB3-1-10  | 0.030396 | 0.000753 | 0.00001  | 0.282169 | 0.000016 | 310   | 0.282165 | -21.32 | -14.67 | 1518 | 2253 | 987  | -0.98 |
| ZB3-1-11  | 0.036248 | 0.000926 | 0.000007 | 0.282268 | 0.000018 | 287.8 | 0.282263 | -17.82 | -11.69 | 1387 | 2048 | 831  | -0.97 |
| ZB3-1-12  | 0.033829 | 0.000933 | 0.000026 | 0.282139 | 0.000014 | 303.4 | 0.282134 | -22.39 | -15.91 | 1567 | 2327 | 1042 | -0.97 |
| ZB3-1-13  | 0.019357 | 0.000441 | 0.000002 | 0.281561 | 0.000016 | 1865  | 0.281545 | -42.83 | -1.84  | 2334 | 2626 | 1946 | -0.99 |
| ZB3-1-14  | 0.030249 | 0.000665 | 0.000024 | 0.281663 | 0.000014 | 1849  | 0.28164  | -39.22 | 1.17   | 2209 | 2430 | 1797 | -0.98 |
| ZB3-1-15  | 0.020423 | 0.00046  | 0.000014 | 0.281662 | 0.000017 | 1827  | 0.281646 | -39.25 | 0.88   | 2199 | 2430 | 1788 | -0.99 |
| ZB3-1-17  | 0.052158 | 0.001454 | 0.000017 | 0.28222  | 0.000016 | 306.2 | 0.282212 | -19.52 | -13.09 | 1474 | 2150 | 924  | -0.96 |
| ZB3-1-19  | 0.011211 | 0.000383 | 0.000014 | 0.282205 | 0.000037 | 1840  | 0.282192 | -20.05 | 20.56  | 1454 | 1213 | 919  | -0.99 |
| ZB3-1-20  | 0.033846 | 0.001009 | 0.000015 | 0.282217 | 0.000015 | 306.2 | 0.282211 | -19.63 | -13.12 | 1461 | 2151 | 917  | -0.97 |
| ZB3-1-21  | 0.066775 | 0.001838 | 0.000006 | 0.282307 | 0.000017 | 310.5 | 0.282296 | -16.44 | -10.02 | 1365 | 1958 | 789  | -0.94 |
| ZB3-1-22  | 0.014884 | 0.000388 | 0.000002 | 0.281339 | 0.000015 | 2532  | 0.28132  | -50.68 | 5.45   | 2630 | 2691 | 2292 | -0.99 |
| ZB3-1-23  | 0.038781 | 0.000915 | 0.000001 | 0.281345 | 0.000015 | 2521  | 0.281301 | -50.46 | 4.52   | 2658 | 2740 | 2319 | -0.97 |
| ZB3-1-25  | 0.003308 | 0.000073 | 0.000006 | 0.281631 | 0.000014 | 1855  | 0.281628 | -40.35 | 0.88   | 2218 | 2450 | 1816 | -1    |
| ZB3-1-27  | 0.071443 | 0.001802 | 0.000022 | 0.282241 | 0.000017 | 314.4 | 0.28223  | -18.78 | -12.27 | 1458 | 2103 | 899  | -0.95 |
| ZB3-1-28  | 0.074851 | 0.001753 | 0.000033 | 0.282219 | 0.000019 | 295.4 | 0.282209 | -19.56 | -13.43 | 1488 | 2163 | 935  | -0.95 |
| ZB3-1-29  | 0.031711 | 0.000813 | 0.000006 | 0.28224  | 0.000017 | 291.6 | 0.282236 | -18.81 | -12.56 | 1422 | 2107 | 874  | -0.98 |
| ZB3-1-31  | 0.100087 | 0.002358 | 0.000045 | 0.282286 | 0.00002  | 320.6 | 0.282272 | -17.19 | -10.65 | 1415 | 2006 | 838  | -0.93 |
| ZB3-1-32  | 0.004328 | 0.000089 | 0.000008 | 0.28164  | 0.000013 | 1864  | 0.281637 | -40.03 | 1.4    | 2207 | 2426 | 1802 | -1    |

|          |          |          |          |          |          |       |          |        |        |      |      |      |       |
|----------|----------|----------|----------|----------|----------|-------|----------|--------|--------|------|------|------|-------|
| ZB3-1-33 | 0.029725 | 0.000691 | 0.000008 | 0.281341 | 0.000017 | 2528  | 0.281308 | -50.61 | 4.94   | 2648 | 2721 | 2310 | -0.98 |
| ZB3-1-35 | 0.011099 | 0.000262 | 0.000002 | 0.281317 | 0.000016 | 2503  | 0.281305 | -51.45 | 4.25   | 2651 | 2744 | 2318 | -0.99 |
| ZB3-1-36 | 0.07185  | 0.001839 | 0.000019 | 0.282218 | 0.000019 | 313.3 | 0.282207 | -19.59 | -13.11 | 1493 | 2157 | 939  | -0.94 |
| ZB3-1-37 | 0.045075 | 0.001204 | 0.000008 | 0.282144 | 0.000017 | 304.6 | 0.282137 | -22.21 | -15.78 | 1571 | 2318 | 1042 | -0.96 |
| ZB3-1-38 | 0.030177 | 0.000917 | 0.000006 | 0.282096 | 0.000016 | 322.8 | 0.282091 | -23.91 | -17.01 | 1626 | 2410 | 1111 | -0.97 |
| ZB3-1-39 | 0.00766  | 0.000179 | 0.000003 | 0.281549 | 0.000017 | 1859  | 0.281543 | -43.25 | -2.05  | 2335 | 2636 | 1950 | -0.99 |
| ZB3-1-40 | 0.06225  | 0.001393 | 0.000009 | 0.281697 | 0.000015 | 1856  | 0.281648 | -38.02 | 1.61   | 2204 | 2406 | 1782 | -0.96 |
| ZB3-1-41 | 0.015873 | 0.000339 | 0.000006 | 0.281643 | 0.000013 | 1818  | 0.281631 | -39.93 | 0.14   | 2217 | 2467 | 1811 | -0.99 |
| ZB3-1-42 | 0.016272 | 0.000351 | 0.000002 | 0.281616 | 0.000014 | 1896  | 0.281603 | -40.88 | 0.92   | 2255 | 2480 | 1854 | -0.99 |
| ZB3-1-43 | 0.014341 | 0.000358 | 0.000024 | 0.281362 | 0.000017 | 2535  | 0.281345 | -49.86 | 6.41   | 2597 | 2636 | 2254 | -0.99 |
| ZB3-1-45 | 0.04776  | 0.001316 | 0.000028 | 0.28226  | 0.000017 | 313.7 | 0.282252 | -18.11 | -11.51 | 1413 | 2056 | 854  | -0.96 |
| ZB3-1-46 | 0.039137 | 0.000875 | 0.000013 | 0.281376 | 0.000018 | 2530  | 0.281334 | -49.37 | 5.91   | 2613 | 2663 | 2267 | -0.97 |
| ZB3-1-47 | 0.020051 | 0.000513 | 0.000008 | 0.281365 | 0.000016 | 2502  | 0.281341 | -49.76 | 5.51   | 2603 | 2666 | 2260 | -0.98 |
| ZB3-1-49 | 0.030307 | 0.000892 | 0.000027 | 0.282186 | 0.000016 | 303.3 | 0.282181 | -20.72 | -14.25 | 1500 | 2221 | 964  | -0.97 |
| ZB3-1-50 | 0.037349 | 0.000891 | 0.000005 | 0.282084 | 0.000015 | 310   | 0.282079 | -24.33 | -17.71 | 1641 | 2444 | 1130 | -0.97 |
| ZB3-1-55 | 0.042871 | 0.000991 | 0.000015 | 0.281679 | 0.000016 | 1850  | 0.281644 | -38.65 | 1.33   | 2206 | 2419 | 1789 | -0.97 |
| ZB3-1-59 | 0.003402 | 0.000066 | 0.000005 | 0.281631 | 0.000014 | 1862  | 0.281629 | -40.35 | 1.07   | 2218 | 2445 | 1815 | -1    |
| ZB3-1-60 | 0.04406  | 0.001165 | 0.000009 | 0.282186 | 0.000018 | 306.8 | 0.282179 | -20.72 | -14.24 | 1511 | 2223 | 972  | -0.96 |
| ZB3-1-62 | 0.039386 | 0.000832 | 0.000005 | 0.281658 | 0.000018 | 1848  | 0.281629 | -39.4  | 0.75   | 2225 | 2453 | 1814 | -0.97 |
| ZB3-1-64 | 0.031776 | 0.00077  | 0.000006 | 0.281349 | 0.000015 | 2491  | 0.281312 | -50.32 | 4.22   | 2643 | 2735 | 2303 | -0.98 |
| ZB3-1-65 | 0.036639 | 0.000937 | 0.000025 | 0.282274 | 0.000015 | 304.6 | 0.282269 | -17.61 | -11.11 | 1379 | 2025 | 821  | -0.97 |
| ZB3-1-66 | 0.0162   | 0.000432 | 0.000008 | 0.281353 | 0.000014 | 2484  | 0.281333 | -50.18 | 4.81   | 2614 | 2695 | 2273 | -0.99 |
| ZB3-1-67 | 0.033083 | 0.000777 | 0.000022 | 0.281329 | 0.000013 | 2594  | 0.281291 | -51.03 | 5.86   | 2670 | 2716 | 2335 | -0.98 |
| ZB3-1-68 | 0.007644 | 0.000189 | 0.000004 | 0.281312 | 0.000013 | 2521  | 0.281303 | -51.63 | 4.6    | 2653 | 2737 | 2321 | -0.99 |
| ZB3-1-69 | 0.039942 | 0.000936 | 0.000012 | 0.282262 | 0.000013 | 292   | 0.282257 | -18.04 | -11.81 | 1396 | 2060 | 841  | -0.97 |
| ZB3-1-70 | 0.024176 | 0.000543 | 0.000001 | 0.281582 | 0.000015 | 1859  | 0.281563 | -42.08 | -1.34  | 2312 | 2592 | 1919 | -0.98 |
| ZB3-1-71 | 0.020344 | 0.000431 | 0.000004 | 0.281638 | 0.000013 | 1856  | 0.281623 | -40.1  | 0.72   | 2229 | 2461 | 1824 | -0.99 |
| ZB3-1-72 | 0.014167 | 0.000353 | 0.000001 | 0.281278 | 0.000013 | 2585  | 0.281261 | -52.83 | 4.58   | 2709 | 2787 | 2385 | -0.99 |

|           |          |          |          |          |          |       |          |        |        |      |      |      |       |
|-----------|----------|----------|----------|----------|----------|-------|----------|--------|--------|------|------|------|-------|
| ZB3-1-74  | 0.062646 | 0.00166  | 0.000022 | 0.282203 | 0.000015 | 305.7 | 0.282194 | -20.12 | -13.74 | 1507 | 2192 | 959  | -0.95 |
| ZB3-1-75  | 0.020879 | 0.000405 | 0.000003 | 0.281574 | 0.000013 | 1847  | 0.28156  | -42.37 | -1.72  | 2315 | 2607 | 1924 | -0.99 |
| ZB3-1-76  | 0.052379 | 0.001367 | 0.000018 | 0.282197 | 0.000013 | 313.8 | 0.282189 | -20.33 | -13.74 | 1503 | 2196 | 960  | -0.96 |
| ZB3-1-81  | 0.02209  | 0.000501 | 0.000011 | 0.28133  | 0.000013 | 2521  | 0.281306 | -51    | 4.7    | 2650 | 2730 | 2314 | -0.98 |
| ZB3-1-82  | 0.039722 | 0.001113 | 0.000014 | 0.282138 | 0.000016 | 312.8 | 0.282132 | -22.42 | -15.77 | 1576 | 2326 | 1049 | -0.97 |
| ZB3-1-84  | 0.019519 | 0.000466 | 0.000018 | 0.281339 | 0.000013 | 2526  | 0.281317 | -50.68 | 5.21   | 2635 | 2703 | 2297 | -0.99 |
| ZB3-1-85  | 0.031547 | 0.000668 | 0.000011 | 0.28164  | 0.000013 | 1839  | 0.281617 | -40.03 | 0.12   | 2240 | 2486 | 1834 | -0.98 |
| ZB3-1-89  | 0.006642 | 0.000146 | 0.000002 | 0.2816   | 0.000013 | 1850  | 0.281595 | -41.45 | -0.41  | 2264 | 2527 | 1868 | -1    |
| ZB3-1-90  | 0.011063 | 0.000251 | 0        | 0.281332 | 0.000015 | 2601  | 0.28132  | -50.92 | 7.05   | 2630 | 2648 | 2294 | -0.99 |
| ZB3-1-91  | 0.024721 | 0.000602 | 0.000011 | 0.282228 | 0.000015 | 302.8 | 0.282225 | -19.24 | -12.7  | 1431 | 2125 | 887  | -0.98 |
| ZB3-1-92  | 0.066503 | 0.001647 | 0.000051 | 0.282141 | 0.000013 | 309.2 | 0.282132 | -22.31 | -15.85 | 1594 | 2327 | 1062 | -0.95 |
| ZB3-1-93  | 0.014107 | 0.000339 | 0.000006 | 0.281294 | 0.000013 | 2522  | 0.281278 | -52.27 | 3.73   | 2687 | 2790 | 2359 | -0.99 |
| ZB3-1-94  | 0.026739 | 0.000689 | 0.000008 | 0.282246 | 0.000011 | 289.6 | 0.282242 | -18.6  | -12.39 | 1409 | 2094 | 861  | -0.98 |
| ZB3-1-95  | 0.036395 | 0.000777 | 0.000009 | 0.281644 | 0.000012 | 1867  | 0.281617 | -39.89 | 0.76   | 2241 | 2468 | 1834 | -0.98 |
| ZB3-1-99  | 0.019598 | 0.000459 | 0.000003 | 0.281301 | 0.000013 | 2497  | 0.281279 | -52.02 | 3.19   | 2686 | 2803 | 2356 | -0.99 |
| ZB3-1-101 | 0.024296 | 0.000541 | 0.000013 | 0.28138  | 0.000015 | 2507  | 0.281354 | -49.23 | 6.09   | 2585 | 2633 | 2238 | -0.98 |
| ZB3-1-102 | 0.011449 | 0.000291 | 0.000008 | 0.281285 | 0.000013 | 2643  | 0.28127  | -52.59 | 6.24   | 2696 | 2729 | 2370 | -0.99 |
| ZB3-1-110 | 0.017154 | 0.000351 | 0.000008 | 0.281593 | 0.000012 | 1867  | 0.281581 | -41.69 | -0.52  | 2286 | 2548 | 1891 | -0.99 |
| ZB4-1-1   | 0.083356 | 0.001622 | 0.000045 | 0.281376 | 0.000014 | 2503  | 0.281299 | -49.37 | 4.04   | 2665 | 2758 | 2320 | -0.95 |
| ZB4-1-2   | 0.018101 | 0.000384 | 0.000002 | 0.281601 | 0.000011 | 1854  | 0.281588 | -41.41 | -0.57  | 2277 | 2541 | 1880 | -0.99 |
| ZB4-1-3   | 0.016274 | 0.000529 | 0.000003 | 0.281323 | 0.000013 | 2497  | 0.281298 | -51.24 | 3.86   | 2661 | 2762 | 2327 | -0.98 |
| ZB4-1-5   | 0.020682 | 0.000477 | 0.000014 | 0.281139 | 0.000014 | 2529  | 0.281116 | -57.75 | -1.87  | 2905 | 3138 | 2611 | -0.99 |
| ZB4-1-9   | 0.035182 | 0.000821 | 0.000012 | 0.281345 | 0.000016 | 2526  | 0.281305 | -50.46 | 4.78   | 2651 | 2727 | 2313 | -0.98 |
| ZB4-1-11  | 0.11632  | 0.002773 | 0.000056 | 0.281676 | 0.000015 | 1860  | 0.281578 | -38.76 | -0.79  | 2318 | 2557 | 1897 | -0.92 |
| ZB4-1-13  | 0.059812 | 0.001345 | 0.000019 | 0.281669 | 0.000014 | 1873  | 0.281621 | -39.01 | 1.04   | 2240 | 2454 | 1825 | -0.96 |
| ZB4-1-14  | 0.029149 | 0.00056  | 0.000047 | 0.281353 | 0.000015 | 2499  | 0.281326 | -50.18 | 4.91   | 2623 | 2700 | 2282 | -0.98 |
| ZB4-1-16  | 0.071779 | 0.001468 | 0.000061 | 0.28134  | 0.000018 | 2515  | 0.28127  | -50.64 | 3.28   | 2704 | 2813 | 2367 | -0.96 |
| ZB4-1-17  | 0.032954 | 0.000917 | 0.000031 | 0.282098 | 0.000014 | 327.6 | 0.282092 | -23.84 | -16.86 | 1623 | 2403 | 1108 | -0.97 |

|          |          |          |          |          |          |       |          |        |        |      |      |      |       |
|----------|----------|----------|----------|----------|----------|-------|----------|--------|--------|------|------|------|-------|
| ZB4-1-18 | 0.065505 | 0.001603 | 0.000022 | 0.282255 | 0.000013 | 322.6 | 0.282245 | -18.28 | -11.56 | 1431 | 2066 | 870  | -0.95 |
| ZB4-1-20 | 0.080456 | 0.001751 | 0.000055 | 0.282347 | 0.000016 | 289   | 0.282338 | -15.03 | -9.01  | 1305 | 1880 | 720  | -0.95 |
| ZB4-1-22 | 0.072735 | 0.001361 | 0.000071 | 0.282292 | 0.000018 | 339.6 | 0.282283 | -16.97 | -9.84  | 1369 | 1969 | 802  | -0.96 |
| ZB4-1-23 | 0.028636 | 0.000681 | 0.000005 | 0.281633 | 0.000012 | 1855  | 0.281609 | -40.28 | 0.2    | 2251 | 2493 | 1846 | -0.98 |
| ZB4-1-26 | 0.041    | 0.001087 | 0.000016 | 0.281651 | 0.000015 | 1879  | 0.281612 | -39.64 | 0.85   | 2250 | 2471 | 1840 | -0.97 |
| ZB4-1-28 | 0.041166 | 0.000906 | 0.000025 | 0.281632 | 0.000014 | 1860  | 0.2816   | -40.32 | 0      | 2265 | 2509 | 1860 | -0.97 |
| ZB4-1-31 | 0.017324 | 0.000401 | 0.000001 | 0.281569 | 0.000012 | 1855  | 0.281555 | -42.54 | -1.72  | 2321 | 2612 | 1931 | -0.99 |
| ZB4-1-32 | 0.035188 | 0.000867 | 0.000024 | 0.28127  | 0.000017 | 2504  | 0.281229 | -53.12 | 1.57   | 2757 | 2910 | 2435 | -0.97 |
| ZB4-1-33 | 0.066297 | 0.001456 | 0.000006 | 0.281408 | 0.000017 | 2526  | 0.281338 | -48.24 | 5.96   | 2609 | 2657 | 2256 | -0.96 |
| ZB4-1-34 | 0.054654 | 0.001336 | 0.000009 | 0.282343 | 0.000015 | 342.6 | 0.282334 | -15.17 | -7.97  | 1296 | 1853 | 717  | -0.96 |
| ZB4-1-36 | 0.02492  | 0.000641 | 0.000011 | 0.282131 | 0.000013 | 400.8 | 0.282126 | -22.67 | -14.05 | 1566 | 2281 | 1045 | -0.98 |
| ZB4-1-40 | 0.051761 | 0.001055 | 0.000044 | 0.281336 | 0.000013 | 2518  | 0.281285 | -50.78 | 3.89   | 2680 | 2777 | 2343 | -0.97 |
| ZB4-1-41 | 0.034082 | 0.000828 | 0.000004 | 0.282249 | 0.000014 | 329.6 | 0.282244 | -18.5  | -11.44 | 1410 | 2064 | 859  | -0.98 |
| ZB4-1-43 | 0.031764 | 0.000883 | 0.000006 | 0.28221  | 0.000014 | 326.3 | 0.282205 | -19.87 | -12.89 | 1466 | 2154 | 924  | -0.97 |
| ZB4-1-45 | 0.031534 | 0.00079  | 0.00002  | 0.282141 | 0.000011 | 310.7 | 0.282136 | -22.31 | -15.68 | 1558 | 2315 | 1034 | -0.98 |
| ZB4-1-48 | 0.026915 | 0.000648 | 0.000031 | 0.281337 | 0.000016 | 2559  | 0.281305 | -50.75 | 5.55   | 2650 | 2706 | 2313 | -0.98 |
| ZB4-1-50 | 0.064048 | 0.001318 | 0.000059 | 0.281344 | 0.000015 | 2483  | 0.281282 | -50.5  | 2.97   | 2688 | 2808 | 2349 | -0.96 |
| ZB4-1-51 | 0.086396 | 0.001642 | 0.000013 | 0.281694 | 0.000015 | 1871  | 0.281636 | -38.12 | 1.52   | 2223 | 2424 | 1801 | -0.95 |
| ZB4-1-57 | 0.037939 | 0.000845 | 0.000041 | 0.281598 | 0.000014 | 1854  | 0.281568 | -41.52 | -1.28  | 2308 | 2583 | 1911 | -0.97 |
| ZB4-1-60 | 0.109549 | 0.002172 | 0.000111 | 0.281678 | 0.000019 | 1883  | 0.2816   | -38.69 | 0.52   | 2278 | 2495 | 1858 | -0.93 |
| ZB4-1-61 | 0.032405 | 0.000695 | 0.000019 | 0.281503 | 0.000012 | 1877  | 0.281478 | -44.88 | -3.95  | 2429 | 2766 | 2053 | -0.98 |
| ZB4-1-62 | 0.067186 | 0.001692 | 0.000026 | 0.28212  | 0.000017 | 299.6 | 0.282111 | -23.06 | -16.81 | 1626 | 2380 | 1098 | -0.95 |
| ZB4-1-63 | 0.055625 | 0.001328 | 0.000016 | 0.282005 | 0.000014 | 373.7 | 0.281996 | -27.12 | -19.25 | 1771 | 2587 | 1275 | -0.96 |
| ZB4-1-64 | 0.007114 | 0.000127 | 0.000009 | 0.28155  | 0.000011 | 1863  | 0.281546 | -43.22 | -1.85  | 2330 | 2627 | 1945 | -1    |
| ZB4-1-65 | 0.017081 | 0.000365 | 0.000022 | 0.281575 | 0.000013 | 1875  | 0.281562 | -42.33 | -1.01  | 2311 | 2584 | 1920 | -0.99 |
| ZB4-1-66 | 0.050105 | 0.000988 | 0.000041 | 0.281632 | 0.000013 | 1871  | 0.281597 | -40.32 | 0.14   | 2270 | 2509 | 1865 | -0.97 |
| ZB4-1-70 | 0.016801 | 0.000385 | 0.000002 | 0.281299 | 0.000012 | 2457  | 0.281281 | -52.09 | 2.34   | 2684 | 2826 | 2354 | -0.99 |
| ZB4-1-72 | 0.01244  | 0.000295 | 0.000014 | 0.281579 | 0.000011 | 1872  | 0.281569 | -42.19 | -0.83  | 2301 | 2571 | 1910 | -0.99 |

|           |          |          |          |          |          |       |          |        |        |      |      |      |       |
|-----------|----------|----------|----------|----------|----------|-------|----------|--------|--------|------|------|------|-------|
| ZB4-1-73  | 0.031972 | 0.000752 | 0.000005 | 0.28131  | 0.000013 | 2478  | 0.281274 | -51.7  | 2.57   | 2694 | 2826 | 2363 | -0.98 |
| ZB4-1-74  | 0.023378 | 0.000502 | 0.000007 | 0.28145  | 0.000013 | 2474  | 0.281426 | -46.75 | 7.89   | 2488 | 2497 | 2125 | -0.98 |
| ZB4-1-75  | 0.053577 | 0.001194 | 0.000025 | 0.281578 | 0.000015 | 1861  | 0.281536 | -42.22 | -2.25  | 2357 | 2650 | 1964 | -0.96 |
| ZB4-1-77  | 0.0059   | 0.000109 | 0.000002 | 0.281574 | 0.000013 | 1857  | 0.28157  | -42.37 | -1.14  | 2297 | 2577 | 1907 | -1    |
| ZB4-1-80  | 0.005051 | 0.000078 | 0.000001 | 0.281554 | 0.000012 | 1886  | 0.281551 | -43.07 | -1.15  | 2322 | 2600 | 1936 | -1    |
| ZB4-1-81  | 0.050774 | 0.001158 | 0.00001  | 0.28131  | 0.000012 | 2490  | 0.281255 | -51.7  | 2.17   | 2723 | 2861 | 2392 | -0.97 |
| ZB4-1-82  | 0.088255 | 0.002158 | 0.000039 | 0.282381 | 0.000022 | 323.6 | 0.282368 | -13.83 | -7.19  | 1270 | 1789 | 671  | -0.94 |
| ZB4-1-83  | 0.084973 | 0.001954 | 0.000071 | 0.282282 | 0.000014 | 299.6 | 0.282271 | -17.33 | -11.15 | 1406 | 2023 | 834  | -0.94 |
| ZB4-1-85  | 0.047748 | 0.00125  | 0.000015 | 0.282101 | 0.000013 | 304.1 | 0.282094 | -23.73 | -17.31 | 1633 | 2414 | 1114 | -0.96 |
| ZB4-1-87  | 0.046623 | 0.000936 | 0.00001  | 0.281296 | 0.000012 | 2499  | 0.281251 | -52.2  | 2.24   | 2726 | 2862 | 2399 | -0.97 |
| ZB4-1-88  | 0.016051 | 0.000455 | 0.000012 | 0.282185 | 0.000015 | 316.7 | 0.282182 | -20.76 | -13.92 | 1484 | 2210 | 953  | -0.99 |
| ZB4-1-90  | 0.061535 | 0.001338 | 0.00001  | 0.281662 | 0.000013 | 1854  | 0.281615 | -39.25 | 0.39   | 2250 | 2481 | 1836 | -0.96 |
| ZB4-1-95  | 0.036428 | 0.000824 | 0.000023 | 0.281324 | 0.000015 | 2505  | 0.281285 | -51.21 | 3.59   | 2680 | 2786 | 2346 | -0.98 |
| ZB4-1-98  | 0.021083 | 0.000494 | 0.000002 | 0.281296 | 0.000012 | 2498  | 0.281272 | -52.2  | 2.96   | 2695 | 2817 | 2367 | -0.99 |
| ZB4-1-99  | 0.043825 | 0.00109  | 0.000004 | 0.281518 | 0.000015 | 1874  | 0.281479 | -44.35 | -3.98  | 2433 | 2765 | 2054 | -0.97 |
| ZB4-1-100 | 0.148188 | 0.002324 | 0.000057 | 0.28171  | 0.000015 | 1895  | 0.281626 | -37.56 | 1.72   | 2241 | 2428 | 1813 | -0.93 |
| ZB4-1-101 | 0.083738 | 0.001969 | 0.000022 | 0.281418 | 0.000018 | 2436  | 0.281327 | -47.88 | 3.49   | 2631 | 2740 | 2276 | -0.94 |
| ZB4-1-102 | 0.019108 | 0.000417 | 0.000005 | 0.282252 | 0.000013 | 325.5 | 0.28225  | -18.39 | -11.32 | 1391 | 2055 | 844  | -0.99 |
| ZB4-1-104 | 0.015085 | 0.000374 | 0.000004 | 0.281312 | 0.000013 | 2505  | 0.281294 | -51.63 | 3.91   | 2665 | 2765 | 2333 | -0.99 |
| ZB4-1-107 | 0.026864 | 0.000755 | 0.000023 | 0.282096 | 0.000017 | 294.6 | 0.282092 | -23.91 | -17.59 | 1619 | 2425 | 1106 | -0.98 |
| ZB4-1-108 | 0.049016 | 0.001184 | 0.000044 | 0.282227 | 0.000015 | 327.4 | 0.28222  | -19.27 | -12.34 | 1454 | 2119 | 905  | -0.96 |

Notes:  $\varepsilon_{\text{Hf}}(t) = 1000 \{ [({}^{176}\text{Hf}/{}^{177}\text{Hf})_s - ({}^{176}\text{Lu}/{}^{177}\text{Hf})_s \times (e^{\lambda t} - 1)] / [({}^{176}\text{Hf}/{}^{177}\text{Hf})_{\text{CHUR},0} - ({}^{176}\text{Lu}/{}^{177}\text{Hf})_{\text{CHUR}} \times (e^{\lambda t} - 1)] - 1 \}$ .  
 $T_{\text{DM}}^{\text{Hf}} = 1/\lambda \times \ln \{ 1 + [({}^{176}\text{Hf}/{}^{177}\text{Hf})_s - ({}^{176}\text{Hf}/{}^{177}\text{Hf})_{\text{DM}}] / [(({}^{176}\text{Lu}/{}^{177}\text{Hf})_s - ({}^{176}\text{Lu}/{}^{177}\text{Hf})_{\text{DM}})] \}$   
 $T_{\text{DM}}^{\text{C}} = 1/\lambda \times \ln \{ 1 + [({}^{176}\text{Hf}/{}^{177}\text{Hf})_{s,t} - ({}^{176}\text{Hf}/{}^{177}\text{Hf})_{\text{DM},t}] / [(({}^{176}\text{Lu}/{}^{177}\text{Hf})_s - ({}^{176}\text{Lu}/{}^{177}\text{Hf})_{\text{DM}})] \} + t$   
The  ${}^{176}\text{Hf}/{}^{177}\text{Hf}$  and  ${}^{176}\text{Lu}/{}^{177}\text{Hf}$  ratios of chondrite and depleted mantle at the present day are 0.282772 and 0.0332, and 0.28325 and 0.0384, respectively (Blichert-Toft and Albarede, 1997).  $\lambda_{\text{Lu}} = 1.867 \times 10^{-11} \text{ year}^{-1}$  (Söderlund et al., 2004).  $({}^{176}\text{Lu}/{}^{177}\text{Hf})_{\text{C}} = 0.015$  (Griffin et al., 2002).  $t$  is the crystallization age of zircon.

Blichert-Toft, J. and Albarède, F., 1997. The Lu-Hf isotope geochemistry of chondrites and the evolution of the mantle-crust system. *Earth and Planetary Science Letters*, 148(1-2), pp.243-258.

Söderlund, U., Patchett, P.J., Vervoort, J.D. and Isachsen, C.E., 2004. The  $^{176}\text{Lu}$  decay constant determined by Lu–Hf and U–Pb isotope systematics of Precambrian mafic intrusions. *Earth and Planetary Science Letters*, 219(3-4), pp.311-324.

Griffin, W.L., Wang, X., Jackson, S.E., Pearson, N.J., O'Reilly, S.Y., Xu, X. and Zhou, X., 2002. Zircon chemistry and magma mixing, SE China: in-situ analysis of Hf isotopes, Tonglu and Pingtan igneous complexes. *Lithos*, 61(3-4), pp.237-269.
